# Supplementary material for: Deletion of the Capn1 Gene Results in Alterations in Signaling Pathways Related to Alzheimer’s Disease, Protein Quality Control and Synaptic Plasticity in Mouse Brain
Source: Front Genet. 2020 Apr 9;11:334. doi: 10.3389/fgene.2020.00334 (PMC7161415; doi:10.3389/fgene.2020.00334)
Supplement: Supplementary file 2 [file Data_Sheet_1.xlsx]

## Sheet: Table S1
Table S1. Primers for RT-qPCR
RT-qPCR Primers	Sequence
Mouse Hspa1b	F: AGGGCATCGACTTCTACACA
	R: GGTTGATGCTCTTGTTCAGG
Mouse Dnajb1	F: TTGCACTGTGAATGTCCCTA
	R: CAGGATGGTTCTGGATGAGA
Mouse Ide	F: GGAGCTGTTTTGCCAGATTA
	R: TAGTGGGGTGGTTTTTCTGA
Mouse Arc	F: GAGAACAACTTGGACGGCTA
	R: CACCTCTCCAGACGGTAGAA
Mouse Pla2g4e	F: CACACAGGAATGACCCTGTC
	R: CTGCACAAACTCCACCTCTT
Mouse Nr4a1	F: TGCTTCGTGTCAGCACTATG
	R: TGCTTGGGTTTTGAAGGTAG
Mouse Per2	F: TCGTGGAATCTTCCAACACT
	R: GCTCCTTCAGGGTCCTTATC
Mouse Gapdh	F: AGGTCGGTGTGAACGGATTTG
	R: TGTAGACCATGTAGTTGAGGTCA

## Sheet: Table S2
Table S2. All expressed gene in WT and KO
ensembl_id	gene_symbol	gene_id	WT1-expression level	WT2-expression level	WT3-expression level	KO1-expression level	KO2-expression level	KO3-expression level	baseMean	log2FoldChange(KO/WT)	lfcSE	stat	pvalue	padj
ENSMUSG00000096780	Tmem181b-ps	ENSMUSG00000096780.7	600	595	595	1744	1552	1667	1125.48	1.46999	0.0700206	20.9936	7.5027e-98	4.84524e-94
ENSMUSG00000000560	Gabra2	ENSMUSG00000000560.9	626	629	622	1375	1439	1443	1022.35	1.18205	0.0678221	17.4287	4.99585e-68	1.61316e-64
ENSMUSG00000073643	Wdfy1	ENSMUSG00000073643.11	200	194	193	580	673	684	420.722	1.72535	0.108899	15.8435	1.55798e-56	3.35381e-53
ENSMUSG00000090015	Gm15446	ENSMUSG00000090015.8	212	193	224	3	5	4	106.78	-5.72086	0.447798	-12.7755	2.24579e-37	NA
ENSMUSG00000056999	Ide	ENSMUSG00000056999.14	1036	1063	974	478	411	543	750.801	-1.10158	0.0913604	-12.0575	1.77111e-33	2.85945e-30
ENSMUSG00000038418	Egr1	ENSMUSG00000038418.7	2191	2594	2514	1542	1524	1675	2006.61	-0.622646	0.0660098	-9.43262	3.99977e-21	5.1661e-18
ENSMUSG00000033585	Ndn	ENSMUSG00000033585.5	1756	1563	1695	2443	2331	2558	2057.5	0.549163	0.0587997	9.33955	9.67428e-21	1.04127e-17
ENSMUSG00000062933	Gm10123	ENSMUSG00000062933.7	724	816	789	1744	2510	2242	1470.65	1.4801	0.16375	9.03877	1.58449e-19	1.43411e-16
ENSMUSG00000040565	Btaf1	ENSMUSG00000040565.7	763	763	765	446	474	445	609.163	-0.74635	0.0826866	-9.02625	1.77653e-19	1.43411e-16
ENSMUSG00000091971	Hspa1a	ENSMUSG00000091971.3	147	171	137	46	41	41	97.139	-1.83682	0.214809	-8.55096	1.22072e-17	NA
ENSMUSG00000026864	Hspa5	ENSMUSG00000026864.13	2895	3484	3149	2185	2102	2352	2694.4	-0.521458	0.0644095	-8.09597	5.68083e-16	4.07631e-13
ENSMUSG00000101939	Gm28438	ENSMUSG00000101939.1	297	347	392	749	688	536	501.689	0.926273	0.121576	7.61889	2.55868e-14	1.6524e-11
ENSMUSG00000005483	Dnajb1	ENSMUSG00000005483.10	857	916	883	597	581	611	740.835	-0.570588	0.0764268	-7.46582	8.27853e-14	4.86025e-11
ENSMUSG00000023034	Nr4a1	ENSMUSG00000023034.7	1046	980	966	633	593	727	824.141	-0.61339	0.0829011	-7.39906	1.37149e-13	7.38092e-11
ENSMUSG00000052727	Map1b	ENSMUSG00000052727.6	12029	11884	10910	9215	8420	9701	10359.6	-0.349311	0.0515351	-6.77812	1.21751e-11	6.04822e-09
ENSMUSG00000027951	Adar	ENSMUSG00000027951.16	2146	2224	2046	1693	1582	1678	1894.8	-0.374217	0.0563208	-6.64439	3.04476e-11	1.4045e-08
ENSMUSG00000064367	mt-Nd5	ENSMUSG00000064367.1	38339	36336	40412	46747	50174	44863	42811.7	0.301005	0.0462668	6.50586	7.7249e-11	3.32583e-08
ENSMUSG00000003814	Calr	ENSMUSG00000003814.8	3252	3580	3050	2578	2342	2602	2900.73	-0.394227	0.0611268	-6.44934	1.12342e-10	4.53439e-08
ENSMUSG00000064368	mt-Nd6	ENSMUSG00000064368.1	10752	11492	11794	13737	14689	13273	12623.1	0.292788	0.0458002	6.39271	1.62966e-10	6.1908e-08
ENSMUSG00000096255	Dynlt1	ENSMUSG00000096255.2	29	34	45	100	132	93	72.4748	1.57907	0.253728	6.22349	4.8621e-10	NA
ENSMUSG00000029135	Fosl2	ENSMUSG00000029135.10	657	685	565	417	415	433	528.588	-0.592832	0.0954033	-6.21395	5.16687e-10	1.85376e-07
ENSMUSG00000022454	Nell2	ENSMUSG00000022454.17	4094	4174	4167	3362	3486	3510	3799	-0.263002	0.0427976	-6.14526	7.98323e-10	2.71346e-07
ENSMUSG00000039485	Tspyl4	ENSMUSG00000039485.8	7516	7283	7362	6219	6284	6403	6844.26	-0.228808	0.0374199	-6.11461	9.6793e-10	3.12545e-07
ENSMUSG00000029657	Hsph1	ENSMUSG00000029657.15	3388	3467	3276	2796	2743	2810	3079.95	-0.279568	0.0460155	-6.07551	1.23596e-09	3.80087e-07
ENSMUSG00000056602	Fry	ENSMUSG00000056602.11	2096	2080	1907	1610	1499	1638	1804.83	-0.358086	0.0596239	-6.00574	1.90465e-09	5.591e-07
ENSMUSG00000069601	Ank3	ENSMUSG00000069601.14	5432	5386	5008	4373	4263	4482	4824.08	-0.270758	0.045195	-5.99087	2.08716e-09	5.86039e-07
ENSMUSG00000105703	Gm43305	ENSMUSG00000105703.2	24	34	67	1	2	1	21.649	-4.98706	0.833636	-5.9823	2.20011e-09	NA
ENSMUSG00000093954	Gm16867	ENSMUSG00000093954.8	31	33	30	0	0	0	15.7037	-7.41787	1.24911	-5.93851	2.87626e-09	NA
ENSMUSG00000023944	Hsp90ab1	ENSMUSG00000023944.14	15186	15464	14971	13520	12256	12867	14044.1	-0.239872	0.0404021	-5.93711	2.90089e-09	7.80581e-07
ENSMUSG00000027254	Map1a	ENSMUSG00000027254.13	13234	13209	11501	10684	9842	10310	11463.2	-0.299465	0.0515791	-5.80594	6.40065e-09	1.65342e-06
ENSMUSG00000030209	Grin2b	ENSMUSG00000030209.14	4796	4738	4551	3462	3627	4124	4216.32	-0.328011	0.056785	-5.77636	7.63338e-09	1.89601e-06
ENSMUSG00000023805	Synj2	ENSMUSG00000023805.17	1008	1123	975	693	768	803	895.15	-0.454221	0.079742	-5.69613	1.22561e-08	2.93148e-06
ENSMUSG00000007594	Hapln4	ENSMUSG00000007594.10	1194	1371	1270	1013	914	974	1122.35	-0.405116	0.0712981	-5.682	1.33129e-08	3.07053e-06
ENSMUSG00000028341	Nr4a3	ENSMUSG00000028341.9	445	549	508	323	327	342	415.607	-0.597038	0.105209	-5.67477	1.38873e-08	3.09255e-06
ENSMUSG00000019874	Fabp7	ENSMUSG00000019874.11	450	421	431	589	673	600	527.42	0.518102	0.0917512	5.64682	1.63444e-08	3.51754e-06
ENSMUSG00000042834	Nrep	ENSMUSG00000042834.14	2215	2239	2418	3201	3108	2619	2633.32	0.376664	0.0667699	5.64122	1.68851e-08	3.51754e-06
ENSMUSG00000040035	Disp2	ENSMUSG00000040035.14	4486	4473	3833	3401	3049	3541	3797.21	-0.356809	0.0638953	-5.58428	2.34668e-08	4.73589e-06
ENSMUSG00000063524	Eno1	ENSMUSG00000063524.13	7059	7441	6458	6068	5423	5473	6320.35	-0.305848	0.0548841	-5.57262	2.50937e-08	4.91075e-06
ENSMUSG00000032589	Bsn	ENSMUSG00000032589.14	4364	4440	4149	3574	3351	3761	3939.69	-0.27768	0.0504343	-5.50577	3.67548e-08	6.98125e-06
ENSMUSG00000022892	App	ENSMUSG00000022892.11	18880	19069	18250	16300	16079	16791	17561.5	-0.192737	0.0351317	-5.48611	4.10873e-08	7.58119e-06
ENSMUSG00000019916	P4ha1	ENSMUSG00000019916.14	665	763	648	461	452	533	586.841	-0.522277	0.0953489	-5.47753	4.31293e-08	7.73692e-06
ENSMUSG00000058153	Sez6l	ENSMUSG00000058153.15	2351	2420	2141	1824	1674	1943	2058.97	-0.345327	0.0640067	-5.39517	6.84573e-08	1.19486e-05
ENSMUSG00000090877	Hspa1b	ENSMUSG00000090877.3	134	199	146	28	54	22	97.1235	-2.21012	0.409931	-5.39145	6.989e-08	NA
ENSMUSG00000021282	Eif5	ENSMUSG00000021282.17	2140	2159	2242	2607	2660	2585	2398.87	0.263885	0.0489559	5.39026	7.03559e-08	1.19568e-05
ENSMUSG00000022602	Arc	ENSMUSG00000022602.14	1638	1796	1939	999	1051	1275	1449.64	-0.691755	0.12851	-5.38291	7.32923e-08	1.20466e-05
ENSMUSG00000004951	Hspb1	ENSMUSG00000004951.10	117	155	129	74	52	58	97.3592	-1.13943	0.211708	-5.38206	7.36388e-08	NA
ENSMUSG00000000787	Ddx3x	ENSMUSG00000000787.12	2681	2607	2666	3106	3157	3152	2894.94	0.243895	0.0453362	5.37969	7.4615e-08	1.20466e-05
ENSMUSG00000030302	Atp2b2	ENSMUSG00000030302.16	7407	8001	6929	6307	5943	6293	6813.31	-0.268909	0.0504585	-5.32931	9.85841e-08	1.55282e-05
ENSMUSG00000001383	Zmat2	ENSMUSG00000001383.8	1387	1490	1528	1824	1857	1779	1644.23	0.309383	0.0581883	5.31693	1.0553e-07	1.62266e-05
ENSMUSG00000026131	Dst	ENSMUSG00000026131.18	6669	6207	5908	5149	4946	5467	5724.39	-0.271203	0.0510997	-5.30733	1.11241e-07	1.67069e-05
ENSMUSG00000029467	Atp2a2	ENSMUSG00000029467.15	11126	11385	10813	9683	9115	9887	10334.9	-0.216394	0.0408369	-5.29897	1.16457e-07	1.70927e-05
ENSMUSG00000048978	Nrsn1	ENSMUSG00000048978.14	2964	2973	2979	3448	3722	3440	3254.23	0.251331	0.0475911	5.28105	1.28446e-07	1.84334e-05
ENSMUSG00000051359	Ncald	ENSMUSG00000051359.15	3707	3979	3937	3193	3309	3334	3576.26	-0.240583	0.0463301	-5.1928	2.07154e-07	2.90827e-05
ENSMUSG00000040249	Lrp1	ENSMUSG00000040249.15	6508	6431	5699	5268	4740	5282	5654.48	-0.285898	0.0554689	-5.15421	2.54702e-07	3.4961e-05
ENSMUSG00000001774	Chordc1	ENSMUSG00000001774.8	1115	1211	1106	857	955	803	1007.79	-0.392313	0.0761705	-5.15046	2.59852e-07	3.4961e-05
ENSMUSG00000047187	Rab2a	ENSMUSG00000047187.9	2341	2337	2484	2880	2858	2788	2614.73	0.251361	0.0489355	5.13658	2.79788e-07	3.6875e-05
ENSMUSG00000035781	R3hdm4	ENSMUSG00000035781.14	1302	1430	1397	1740	1699	1663	1538.38	0.303975	0.0592598	5.12954	2.90456e-07	3.75153e-05
ENSMUSG00000031996	Aplp2	ENSMUSG00000031996.17	7839	7657	7611	6934	6344	6655	7173.33	-0.213617	0.0417119	-5.12126	3.03505e-07	3.84321e-05
ENSMUSG00000032060	Cryab	ENSMUSG00000032060.10	995	979	968	809	739	732	870.492	-0.369741	0.07247	-5.10199	3.36109e-07	4.17421e-05
ENSMUSG00000032826	Ank2	ENSMUSG00000032826.17	9156	8800	8304	7536	7405	7664	8144.05	-0.21614	0.0424329	-5.09368	3.51177e-07	4.27906e-05
ENSMUSG00000092609	Gm20481	ENSMUSG00000092609.1	69	76	72	31	28	20	49.5947	-1.46515	0.288088	-5.08575	3.66178e-07	NA
ENSMUSG00000030451	Herc2	ENSMUSG00000030451.16	3797	3764	3467	2991	2948	3236	3367.18	-0.26512	0.052506	-5.04932	4.43378e-07	5.30248e-05
ENSMUSG00000021313	Ryr2	ENSMUSG00000021313.16	2548	2474	2352	2059	1943	2117	2248.85	-0.269019	0.0544287	-4.9426	7.70888e-07	9.05162e-05
ENSMUSG00000038664	Herc1	ENSMUSG00000038664.16	3149	3084	3058	2562	2356	2754	2827.34	-0.275973	0.0560219	-4.92616	8.38622e-07	9.67111e-05
ENSMUSG00000097451	Rian	ENSMUSG00000097451.10	4609	4562	4759	5427	5160	5593	5018.21	0.216091	0.0439445	4.91735	8.77226e-07	9.93882e-05
ENSMUSG00000066036	Ubr4	ENSMUSG00000066036.14	2860	2726	2462	2144	1955	2323	2411.87	-0.325218	0.0666382	-4.88035	1.05897e-06	0.000117911
ENSMUSG00000031708	Tecr	ENSMUSG00000031708.16	3565	3595	3310	3067	2624	2928	3181.56	-0.281787	0.0578349	-4.87226	1.10327e-06	0.000120762
ENSMUSG00000015656	Hspa8	ENSMUSG00000015656.17	16240	16327	16502	14873	14334	14671	15491.1	-0.161481	0.0332506	-4.85648	1.19494e-06	0.000128615
ENSMUSG00000064372	mt-Tp	ENSMUSG00000064372.1	738	810	912	1114	1088	1018	946.863	0.387077	0.079861	4.84689	1.25413e-06	0.000132773
ENSMUSG00000019947	Arid5b	ENSMUSG00000019947.10	533	515	529	321	406	390	448.967	-0.491929	0.102035	-4.82117	1.42715e-06	0.000148654
ENSMUSG00000024966	Stip1	ENSMUSG00000024966.8	2310	2248	2212	1910	1862	1939	2080.07	-0.245224	0.0512966	-4.7805	1.74859e-06	0.000179245
ENSMUSG00000096596	Gm10591	ENSMUSG00000096596.1	16	9	20	0	0	0	7.52547	-6.35322	1.33383	-4.76313	1.90617e-06	NA
ENSMUSG00000042744	Hectd4	ENSMUSG00000042744.16	3578	3432	3113	2829	2621	2914	3081.25	-0.275371	0.057869	-4.75854	1.95003e-06	0.00019677
ENSMUSG00000069072	Slc7a14	ENSMUSG00000069072.9	1581	1742	1551	1350	1265	1347	1472.57	-0.29988	0.0635563	-4.71833	2.37786e-06	0.000236249
ENSMUSG00000020964	Sel1l	ENSMUSG00000020964.14	2123	2067	1996	1651	1680	1813	1888.33	-0.264919	0.0566936	-4.67283	2.97079e-06	0.000290688
ENSMUSG00000021939	Ctsb	ENSMUSG00000021939.8	5786	5931	5777	5354	4925	4882	5442.51	-0.207437	0.0446208	-4.64889	3.33733e-06	0.000321678
ENSMUSG00000029020	Mfn2	ENSMUSG00000029020.13	2116	2319	2035	1826	1768	1776	1973.12	-0.269921	0.0584605	-4.61715	3.89053e-06	0.000368198
ENSMUSG00000025264	Tsr2	ENSMUSG00000025264.12	635	566	577	722	828	774	683.575	0.388947	0.0842818	4.61484	3.93399e-06	0.000368198
ENSMUSG00000053192	Mllt11	ENSMUSG00000053192.9	2485	2512	2713	3023	3011	2998	2790.31	0.228259	0.0495512	4.60653	4.09447e-06	0.000377744
ENSMUSG00000053580	Tanc2	ENSMUSG00000053580.16	1887	1827	1673	1339	1353	1593	1612.08	-0.328523	0.0713741	-4.60283	4.16788e-06	0.000379101
ENSMUSG00000039953	Clstn1	ENSMUSG00000039953.13	10583	11300	10168	9639	8970	9163	9970.64	-0.207116	0.0450297	-4.59954	4.23428e-06	0.000379792
ENSMUSG00000083929	Gm10600	ENSMUSG00000083929.3	13	8	19	0	0	0	6.67824	-6.18143	1.35299	-4.56871	4.9074e-06	NA
ENSMUSG00000020484	Xbp1	ENSMUSG00000020484.18	775	915	827	657	637	653	744.123	-0.371566	0.0813287	-4.56869	4.9078e-06	0.000434172
ENSMUSG00000101671	Gm28221	ENSMUSG00000101671.1	923	1061	962	763	787	774	878.414	-0.34233	0.0749868	-4.56521	4.99006e-06	0.000435484
ENSMUSG00000051391	Ywhag	ENSMUSG00000051391.9	11856	12128	11830	10702	10581	10860	11326.2	-0.156112	0.0342896	-4.55276	5.29477e-06	0.000450752
ENSMUSG00000050071	Bex1	ENSMUSG00000050071.8	600	607	640	455	493	450	540.966	-0.401349	0.0881627	-4.55237	5.3046e-06	0.000450752
ENSMUSG00000069833	Ahnak	ENSMUSG00000069833.12	436	485	438	354	292	327	388.883	-0.486466	0.107039	-4.54474	5.5004e-06	0.000461319
ENSMUSG00000046876	Atxn1	ENSMUSG00000046876.16	884	875	784	678	651	664	756.075	-0.353037	0.0783706	-4.50472	6.64618e-06	0.000550269
ENSMUSG00000049044	Rapgef4	ENSMUSG00000049044.16	3435	3674	3897	3137	3154	3110	3401.31	-0.22744	0.05074	-4.48247	7.37837e-06	0.000603158
ENSMUSG00000096054	Syne1	ENSMUSG00000096054.3	8533	7975	7770	7165	6597	7213	7542.09	-0.211024	0.0471558	-4.47503	7.64012e-06	0.000616749
ENSMUSG00000028410	Dnaja1	ENSMUSG00000028410.13	3751	3848	3869	3202	3389	3388	3574.54	-0.200038	0.0448723	-4.45795	8.27469e-06	0.000659727
ENSMUSG00000034825	Nrip3	ENSMUSG00000034825.14	1536	1435	1545	1783	1795	1794	1648.04	0.251242	0.0564055	4.45422	8.41992e-06	0.00066312
ENSMUSG00000033004	Mycbp2	ENSMUSG00000033004.15	4635	4510	4524	3755	3747	4207	4229.89	-0.222422	0.0499963	-4.44876	8.6367e-06	0.000671998
ENSMUSG00000045193	Cirbp	ENSMUSG00000045193.13	481	436	451	614	600	583	527.58	0.392756	0.0886234	4.43174	9.34751e-06	0.000717889
ENSMUSG00000004110	Cacna1e	ENSMUSG00000004110.16	3039	3173	3036	2581	2349	2794	2828.58	-0.259815	0.0586566	-4.42942	9.44883e-06	0.000717889
ENSMUSG00000022255	Mtdh	ENSMUSG00000022255.16	896	939	1011	1109	1194	1223	1061.74	0.309862	0.0707967	4.37678	1.20447e-05	0.000904473
ENSMUSG00000024335	Brd2	ENSMUSG00000024335.19	1660	1737	1603	2022	1934	1962	1819.69	0.24178	0.0553419	4.36884	1.24906e-05	0.000927178
ENSMUSG00000056222	Spock1	ENSMUSG00000056222.15	2187	2173	2129	1966	1719	1766	1990.02	-0.253305	0.0582658	-4.3474	1.37762e-05	0.000998669
ENSMUSG00000048154	Kmt2d	ENSMUSG00000048154.17	1571	1511	1333	1304	1043	1123	1314	-0.350122	0.080568	-4.34567	1.38851e-05	0.000998669
ENSMUSG00000032115	Hyou1	ENSMUSG00000032115.14	1224	1298	1117	969	892	1036	1089.29	-0.329631	0.0758618	-4.34516	1.39177e-05	0.000998669
ENSMUSG00000030695	Aldoa	ENSMUSG00000030695.16	11463	11977	11125	10585	9711	10122	10830.5	-0.184728	0.0425525	-4.34117	1.41723e-05	0.00100577
ENSMUSG00000061601	Pclo	ENSMUSG00000061601.15	3355	3401	3224	2734	2453	3050	3036.32	-0.276784	0.0638071	-4.33782	1.43904e-05	0.00101014
ENSMUSG00000025153	Fasn	ENSMUSG00000025153.9	2899	3138	2679	2462	2290	2531	2666.61	-0.259813	0.0605304	-4.29227	1.76859e-05	0.00122647
ENSMUSG00000035885	Cox8a	ENSMUSG00000035885.4	2741	2859	2997	3423	3466	3160	3107.43	0.224428	0.0523214	4.28941	1.79145e-05	0.00122647
ENSMUSG00000039542	Ncam1	ENSMUSG00000039542.16	2774	2719	2492	2282	2128	2341	2456.03	-0.242669	0.0565946	-4.28784	1.80419e-05	0.00122647
ENSMUSG00000025261	Huwe1	ENSMUSG00000025261.17	4372	4142	3922	3556	3330	3728	3841.72	-0.228349	0.05329	-4.28503	1.82713e-05	0.00122912
ENSMUSG00000002028	Kmt2a	ENSMUSG00000002028.13	2277	2224	2183	1664	1859	2009	2036.03	-0.270578	0.0631951	-4.28163	1.85532e-05	0.00123522
ENSMUSG00000049313	Sorl1	ENSMUSG00000049313.8	5043	5387	4816	4538	4020	4451	4709.17	-0.229663	0.053824	-4.26692	1.98187e-05	0.00130601
ENSMUSG00000053536	Cstf2t	ENSMUSG00000053536.6	920	915	899	734	754	727	825.031	-0.302927	0.0714945	-4.23707	2.26452e-05	0.00146981
ENSMUSG00000018411	Mapt	ENSMUSG00000018411.17	5369	5391	5094	4696	4581	4740	4978.61	-0.177825	0.0419801	-4.23594	2.27595e-05	0.00146981
ENSMUSG00000015837	Sqstm1	ENSMUSG00000015837.15	4062	4113	3882	3641	3443	3484	3770.83	-0.191088	0.0453787	-4.21097	2.54277e-05	0.00162586
ENSMUSG00000020850	Prpf8	ENSMUSG00000020850.14	2422	2459	2370	2102	1959	2152	2243.99	-0.223282	0.0530802	-4.2065	2.59355e-05	0.00164207
ENSMUSG00000060681	Slc9a6	ENSMUSG00000060681.15	1325	1320	1264	1462	1589	1615	1428.93	0.257093	0.061579	4.175	2.97984e-05	0.0018538
ENSMUSG00000025190	Got1	ENSMUSG00000025190.13	3706	3805	3527	3345	3058	3165	3434.4	-0.20709	0.0496074	-4.17458	2.98537e-05	0.0018538
ENSMUSG00000071659	Hnrnpul2	ENSMUSG00000071659.3	3710	3611	3535	3069	3222	3223	3394.96	-0.189387	0.0455511	-4.15768	3.21497e-05	0.00197736
ENSMUSG00000031391	L1cam	ENSMUSG00000031391.18	1460	1444	1260	1142	1001	1195	1250.26	-0.319001	0.076789	-4.15426	3.26344e-05	0.00198586
ENSMUSG00000102543	Pcdhgc5	ENSMUSG00000102543.5	759	835	725	533	599	655	684.488	-0.373578	0.089967	-4.15238	3.2903e-05	0.00198586
ENSMUSG00000022228	Zscan26	ENSMUSG00000022228.14	907	932	886	663	720	788	816.026	-0.325431	0.0785985	-4.14042	3.46669e-05	0.00207295
ENSMUSG00000074505	Fat3	ENSMUSG00000074505.5	1103	1102	1027	808	892	922	975.857	-0.299408	0.0725117	-4.1291	3.64181e-05	0.00215769
ENSMUSG00000024942	Capn1	ENSMUSG00000024942.16	294	246	240	343	386	362	311.788	0.487588	0.118159	4.12655	3.68253e-05	NA
ENSMUSG00000002100	Mybpc3	ENSMUSG00000002100.15	64	51	64	163	98	96	89.4145	0.984777	0.238897	4.12219	3.75289e-05	NA
ENSMUSG00000066392	Nrxn3	ENSMUSG00000066392.11	2604	2667	2565	2177	2250	2352	2435.82	-0.208329	0.0505505	-4.12121	3.76892e-05	0.0022127
ENSMUSG00000031770	Herpud1	ENSMUSG00000031770.16	563	582	547	417	436	455	499.901	-0.371002	0.0903962	-4.10417	4.05768e-05	0.00236077
ENSMUSG00000043940	Wdfy3	ENSMUSG00000043940.15	3509	3446	3044	2690	2814	2967	3078.29	-0.238375	0.0581893	-4.09655	4.1936e-05	0.00241806
ENSMUSG00000036766	Dner	ENSMUSG00000036766.12	2270	2251	2193	2051	1795	1867	2070.98	-0.234636	0.0573794	-4.08921	4.32838e-05	0.00247369
ENSMUSG00000074657	Kif5a	ENSMUSG00000074657.5	23740	23759	22987	21667	21549	20954	22442.7	-0.135566	0.0332791	-4.0736	4.62921e-05	0.0026224
ENSMUSG00000052698	Tln2	ENSMUSG00000052698.15	1650	1710	1530	1398	1323	1391	1500.3	-0.250801	0.0616711	-4.06675	4.76741e-05	0.00264868
ENSMUSG00000004207	Psap	ENSMUSG00000004207.14	14010	14533	13849	12900	12594	12893	13463.4	-0.143311	0.0352494	-4.06562	4.79044e-05	0.00264868
ENSMUSG00000034135	Sik3	ENSMUSG00000034135.15	1758	1798	1579	1366	1362	1524	1564.59	-0.271682	0.0668308	-4.06522	4.79862e-05	0.00264868
ENSMUSG00000020048	Hsp90b1	ENSMUSG00000020048.13	2461	2450	2407	2173	2100	2102	2282.21	-0.199482	0.0491096	-4.06197	4.866e-05	0.0026631
ENSMUSG00000085830	Grin1os	ENSMUSG00000085830.1	1987	2052	1783	1660	1443	1691	1769.43	-0.280741	0.0693788	-4.0465	5.19902e-05	0.00282145
ENSMUSG00000022769	Sdf2l1	ENSMUSG00000022769.9	120	184	139	70	99	79	115.138	-0.833379	0.206115	-4.04327	5.27112e-05	NA
ENSMUSG00000024073	Birc6	ENSMUSG00000024073.15	2039	1830	1858	1675	1526	1627	1759.28	-0.246413	0.0610213	-4.03814	5.38757e-05	0.00289941
ENSMUSG00000028634	Hivep3	ENSMUSG00000028634.17	724	807	810	528	591	682	690.178	-0.375403	0.0930569	-4.03413	5.4806e-05	0.0029251
ENSMUSG00000003316	Glg1	ENSMUSG00000003316.14	3216	3221	2894	2610	2575	2808	2887.38	-0.223072	0.0553655	-4.02908	5.59967e-05	0.00296415
ENSMUSG00000034892	Rps29	ENSMUSG00000034892.8	1168	1254	1394	1516	1578	1511	1403.58	0.270954	0.0676387	4.00591	6.17803e-05	0.00324372
ENSMUSG00000045482	Trrap	ENSMUSG00000045482.16	1753	1786	1653	1445	1362	1553	1591.9	-0.251802	0.0628897	-4.00386	6.23166e-05	0.00324549
ENSMUSG00000059003	Grin2a	ENSMUSG00000059003.12	1459	1492	1332	1252	1170	1156	1310.07	-0.261407	0.0656715	-3.98053	6.87631e-05	0.00355258
ENSMUSG00000045983	Eif4g1	ENSMUSG00000045983.16	3329	3199	3162	2881	2697	2896	3027.39	-0.193536	0.0486537	-3.97783	6.95476e-05	0.00356459
ENSMUSG00000029328	Hnrnpdl	ENSMUSG00000029328.15	1651	1358	1543	1897	1771	1818	1672.98	0.269692	0.0678566	3.97444	7.05446e-05	0.00358722
ENSMUSG00000040225	Prrc2c	ENSMUSG00000040225.15	2473	2494	2230	1971	1947	2173	2214.72	-0.240116	0.0604602	-3.97147	7.14298e-05	0.00360386
ENSMUSG00000095675	Ccl21b	ENSMUSG00000095675.1	9	18	2	0	0	0	4.8576	-5.73	1.46131	-3.92114	8.81311e-05	NA
ENSMUSG00000028804	Csmd2	ENSMUSG00000028804.20	727	722	629	478	490	611	609.587	-0.392885	0.10024	-3.91945	8.87504e-05	0.00443297
ENSMUSG00000020571	Pdia6	ENSMUSG00000020571.12	1201	1471	1298	1048	1069	1124	1201.93	-0.293048	0.0748191	-3.91675	8.97503e-05	0.00443297
ENSMUSG00000020893	Per1	ENSMUSG00000020893.17	962	996	991	781	782	861	895.464	-0.282496	0.0721532	-3.91523	9.03182e-05	0.00443297
ENSMUSG00000038128	Camk4	ENSMUSG00000038128.6	3331	3253	3365	3836	3756	3636	3529.58	0.174117	0.0444806	3.91445	9.06088e-05	0.00443297
ENSMUSG00000019082	Slc25a22	ENSMUSG00000019082.18	1717	1853	1642	1555	1392	1438	1599.73	-0.250851	0.064127	-3.91178	9.16178e-05	0.00444863
ENSMUSG00000031778	Cx3cl1	ENSMUSG00000031778.13	4839	5396	4817	4360	4121	4562	4682.58	-0.206928	0.0530871	-3.89789	9.70345e-05	0.0046268
ENSMUSG00000025823	Pdia4	ENSMUSG00000025823.9	415	443	399	329	321	299	367.772	-0.409133	0.104971	-3.89757	9.71633e-05	0.0046268
ENSMUSG00000034336	Ina	ENSMUSG00000034336.3	2728	2827	2419	2269	2294	2252	2464.85	-0.227002	0.0582522	-3.89689	9.74365e-05	0.0046268
ENSMUSG00000026959	Grin1	ENSMUSG00000026959.13	4034	4394	3887	3775	3105	3508	3784.01	-0.246615	0.063357	-3.89246	9.92326e-05	0.0046777
ENSMUSG00000028790	Khdrbs1	ENSMUSG00000028790.13	1232	1315	1347	1126	1098	1051	1195.02	-0.251178	0.06498	-3.86547	0.000110877	0.00518872
ENSMUSG00000036452	Arhgap26	ENSMUSG00000036452.17	1290	1329	1341	1152	1125	1078	1219.21	-0.240534	0.0623823	-3.8558	0.00011535	0.00535922
ENSMUSG00000107756	Gm44164	ENSMUSG00000107756.1	24	35	16	6	5	6	15.4154	-2.16609	0.561987	-3.85434	0.000116042	NA
ENSMUSG00000026442	Nfasc	ENSMUSG00000026442.14	4304	3958	3692	3617	3103	3428	3683.53	-0.237024	0.061511	-3.85337	0.000116504	0.00537416
ENSMUSG00000038894	Irs2	ENSMUSG00000038894.7	961	1065	839	764	713	799	856.94	-0.333166	0.0869034	-3.83375	0.000126204	0.00578031
ENSMUSG00000040383	Aqr	ENSMUSG00000040383.16	527	512	461	383	386	391	443.315	-0.371012	0.0968555	-3.83057	0.000127847	0.00581434
ENSMUSG00000018648	Dusp14	ENSMUSG00000018648.15	281	349	326	252	214	219	273.416	-0.487715	0.127406	-3.82803	0.000129175	NA
ENSMUSG00000024427	Spry4	ENSMUSG00000024427.6	227	222	192	134	122	166	176.903	-0.601537	0.157511	-3.81901	0.000133987	NA
ENSMUSG00000039671	Zmynd8	ENSMUSG00000039671.18	1200	1374	1305	1082	1101	1067	1188.1	-0.255968	0.0671761	-3.8104	0.000138745	0.00622433
ENSMUSG00000026193	Fn1	ENSMUSG00000026193.15	725	710	747	577	608	582	658.135	-0.302711	0.0794467	-3.81023	0.000138836	0.00622433
ENSMUSG00000042406	Atf4	ENSMUSG00000042406.8	1041	1098	1095	936	914	838	987.074	-0.267863	0.0703613	-3.80697	0.000140682	0.00622433
ENSMUSG00000030103	Bhlhe40	ENSMUSG00000030103.11	905	1151	980	767	748	879	905.031	-0.343269	0.0901702	-3.8069	0.000140717	0.00622433
ENSMUSG00000008348	Ubc	ENSMUSG00000008348.9	941	844	873	732	673	756	803.049	-0.297686	0.0782445	-3.80456	0.000142054	0.00624073
ENSMUSG00000030020	Prickle2	ENSMUSG00000030020.13	1792	1866	1769	1413	1549	1640	1671.55	-0.236172	0.0622182	-3.79586	0.00014713	0.00642005
ENSMUSG00000020142	Slc1a4	ENSMUSG00000020142.12	672	685	612	514	513	544	590.199	-0.325866	0.0860392	-3.78742	0.000152222	0.0065617
ENSMUSG00000026112	Coa5	ENSMUSG00000026112.7	839	752	790	932	1014	944	878.733	0.281071	0.0742178	3.78711	0.000152409	0.0065617
ENSMUSG00000078816	Prkcg	ENSMUSG00000078816.9	2204	2391	2163	2048	1700	1938	2074.03	-0.250717	0.0663569	-3.77831	0.000157899	0.00675307
ENSMUSG00000021750	Fam107a	ENSMUSG00000021750.15	2768	2643	2729	3196	3383	2880	2933.18	0.216358	0.0573401	3.77325	0.000161134	0.00684607
ENSMUSG00000050211	Pla2g4e	ENSMUSG00000050211.14	43	37	43	87	73	79	60.2294	0.94509	0.250731	3.76934	0.000163682	NA
ENSMUSG00000020737	Hn1	ENSMUSG00000020737.12	391	352	328	457	498	447	412.1	0.38939	0.103597	3.75871	0.000170794	0.00720905
ENSMUSG00000027894	Slc6a17	ENSMUSG00000027894.14	5295	5511	5159	4658	4564	4956	5023.93	-0.171196	0.045647	-3.75043	0.000176529	0.00740276
ENSMUSG00000027763	Mbnl1	ENSMUSG00000027763.13	1159	1105	1137	912	972	975	1043.53	-0.248476	0.0665	-3.73648	0.000186613	0.00777512
ENSMUSG00000030683	Sez6l2	ENSMUSG00000030683.11	3087	3192	2669	2719	2332	2472	2745.31	-0.251198	0.0672791	-3.73368	0.000188703	0.00781183
ENSMUSG00000038170	Pde4dip	ENSMUSG00000038170.15	2119	2251	2044	1849	1776	1916	1992.42	-0.211312	0.0566708	-3.72877	0.000192418	0.00789537
ENSMUSG00000115469	CT010505.2	ENSMUSG00000115469.1	2079	2029	1902	1708	1684	1797	1866.51	-0.211537	0.0567461	-3.72779	0.000193166	0.00789537
ENSMUSG00000095562	Gm21887	ENSMUSG00000095562.7	37	27	17	79	69	43	45.1932	1.23257	0.331418	3.71908	0.000199952	NA
ENSMUSG00000022416	Cacna1i	ENSMUSG00000022416.15	1226	1258	1096	991	1015	986	1095.45	-0.258852	0.069735	-3.71194	0.000205674	0.00835373
ENSMUSG00000001924	Uba1	ENSMUSG00000001924.15	3839	4196	3470	3349	3045	3399	3549.68	-0.232916	0.062788	-3.70957	0.000207611	0.00837972
ENSMUSG00000005533	Igf1r	ENSMUSG00000005533.10	885	927	783	709	680	721	784.142	-0.299334	0.0807514	-3.70685	0.000209851	0.00841748
ENSMUSG00000035864	Syt1	ENSMUSG00000035864.14	10629	11394	11076	9462	9784	10380	10454.3	-0.159705	0.0431057	-3.70497	0.000211413	0.0084278
ENSMUSG00000037152	Ndufc1	ENSMUSG00000037152.11	381	378	374	540	486	445	434.071	0.374178	0.10109	3.70144	0.000214383	0.00849378
ENSMUSG00000039568	Ubald1	ENSMUSG00000039568.6	772	823	781	699	624	619	719.613	-0.295061	0.080168	-3.68054	0.000232743	0.00916496
ENSMUSG00000039501	Znfx1	ENSMUSG00000039501.14	731	731	691	610	507	605	645.759	-0.324064	0.0881338	-3.67695	0.000236037	0.00923835
ENSMUSG00000079564	Gm11149	ENSMUSG00000079564.3	666	672	569	521	456	522	567.839	-0.348435	0.0948433	-3.67379	0.000238976	0.00929704
ENSMUSG00000041444	Arhgap32	ENSMUSG00000041444.14	3186	3242	2964	2652	2661	2888	2932.13	-0.194839	0.0530579	-3.6722	0.000240473	0.00929924
ENSMUSG00000030268	Bcat1	ENSMUSG00000030268.17	1242	1226	1109	980	976	1042	1095.79	-0.253651	0.0691316	-3.6691	0.000243407	0.00935667
ENSMUSG00000054423	Cadps	ENSMUSG00000054423.14	3379	3390	3253	2996	2888	3033	3156.39	-0.168723	0.0460326	-3.6653	0.00024705	0.00944052
ENSMUSG00000055866	Per2	ENSMUSG00000055866.9	324	418	296	210	222	285	292.51	-0.530946	0.145073	-3.65986	0.000252355	NA
ENSMUSG00000032301	Psma4	ENSMUSG00000032301.13	614	571	586	740	716	712	656.373	0.291787	0.0797409	3.65919	0.000253011	0.00961145
ENSMUSG00000027296	Itpka	ENSMUSG00000027296.7	818	954	885	715	762	697	805.044	-0.290164	0.0795494	-3.6476	0.0002647	0.00999667
ENSMUSG00000042182	Bend6	ENSMUSG00000042182.16	1513	1492	1585	1829	1800	1688	1651.15	0.211452	0.0580756	3.64098	0.000271604	0.0101978
ENSMUSG00000062591	Tubb4a	ENSMUSG00000062591.5	7900	8072	7227	7242	6358	6751	7258.46	-0.18952	0.0521848	-3.6317	0.000281559	0.0105104
ENSMUSG00000089774	Slc5a3	ENSMUSG00000089774.2	549	573	485	404	398	449	476.196	-0.35916	0.0990059	-3.62766	0.000286001	0.0106149
ENSMUSG00000023033	Scn8a	ENSMUSG00000023033.14	3693	3869	3458	3220	2990	3381	3435.36	-0.20044	0.0554532	-3.61458	0.000300835	0.0111017
ENSMUSG00000016150	Tenm1	ENSMUSG00000016150.15	1076	996	1035	828	766	946	941.139	-0.289592	0.0802726	-3.6076	0.000309038	0.0113396
ENSMUSG00000058006	Mdn1	ENSMUSG00000058006.12	1003	997	855	792	678	826	858.495	-0.314719	0.0873092	-3.60465	0.000312577	0.0114046
ENSMUSG00000070003	Ssbp4	ENSMUSG00000070003.7	624	648	681	820	821	744	722.969	0.286985	0.0797271	3.5996	0.000318712	0.0115632
ENSMUSG00000027499	Pkia	ENSMUSG00000027499.12	1901	1759	1976	2141	2297	2093	2027.74	0.213099	0.0592514	3.59652	0.000322501	0.0116353
ENSMUSG00000047976	Kcna1	ENSMUSG00000047976.4	1568	1587	1421	1260	1327	1323	1414.49	-0.226236	0.0630749	-3.58679	0.00033478	0.0120112
ENSMUSG00000094800	Gm9780	ENSMUSG00000094800.8	1	1	3	22	29	2	9.66521	3.40726	0.950429	3.58497	0.000337115	NA
ENSMUSG00000026944	Abca2	ENSMUSG00000026944.18	3739	3430	3150	3088	2821	2996	3203.89	-0.213016	0.0595	-3.58011	0.000343452	0.0122111
ENSMUSG00000024030	Abcg1	ENSMUSG00000024030.6	702	693	617	577	492	542	603.843	-0.32273	0.0901584	-3.57959	0.000344135	0.0122111
ENSMUSG00000022658	Tagln3	ENSMUSG00000022658.10	2159	2096	2153	2536	2410	2339	2282.12	0.183973	0.0516028	3.56517	0.000363627	0.0127657
ENSMUSG00000040459	Arglu1	ENSMUSG00000040459.11	1199	1152	1259	1389	1412	1399	1301.68	0.219376	0.0615344	3.5651	0.000363717	0.0127657
ENSMUSG00000031983	2310022B05Rik	ENSMUSG00000031983.7	742	666	666	842	879	798	765.224	0.281407	0.0790567	3.55955	0.000371488	0.0129449
ENSMUSG00000025020	Slit1	ENSMUSG00000025020.11	666	622	587	499	424	545	557.287	-0.352533	0.0990649	-3.5586	0.000372832	0.0129449
ENSMUSG00000036158	Prickle1	ENSMUSG00000036158.12	769	845	797	647	664	682	733.802	-0.275036	0.07738	-3.55436	0.000378903	0.0130853
ENSMUSG00000006711	D130043K22Rik	ENSMUSG00000006711.15	393	446	428	303	328	345	373.881	-0.376108	0.105964	-3.54939	0.000386128	0.0132639
ENSMUSG00000064370	mt-Cytb	ENSMUSG00000064370.1	56711	56754	61720	64557	69371	61930	61840.6	0.160931	0.0453927	3.54531	0.000392149	0.0133994
ENSMUSG00000059970	Hspa2	ENSMUSG00000059970.7	335	379	348	269	287	244	310.241	-0.409954	0.116012	-3.53372	0.000409756	NA
ENSMUSG00000048078	Tenm4	ENSMUSG00000048078.16	1309	1385	1281	1095	1065	1207	1223.6	-0.238903	0.0677009	-3.5288	0.000417451	0.0141889
ENSMUSG00000020716	Nf1	ENSMUSG00000020716.16	1176	1211	1086	1009	834	1016	1055.26	-0.281593	0.0798482	-3.52661	0.000420922	0.014232
ENSMUSG00000002052	Supt6	ENSMUSG00000002052.6	1989	2137	1924	1734	1641	1840	1877.69	-0.214312	0.0608255	-3.52339	0.000426066	0.0143108
ENSMUSG00000024213	Nudt3	ENSMUSG00000024213.14	2811	2987	3016	2768	2506	2422	2751.59	-0.197373	0.056034	-3.52238	0.000427683	0.0143108
ENSMUSG00000022565	Plec	ENSMUSG00000022565.15	1892	1942	1689	1611	1474	1631	1706.32	-0.228835	0.0650523	-3.5177	0.000435298	0.0144905
ENSMUSG00000041313	Slc7a1	ENSMUSG00000041313.14	658	678	638	538	561	510	597.125	-0.29593	0.0842079	-3.51428	0.00044095	0.0146034
ENSMUSG00000106375	Gm43361	ENSMUSG00000106375.1	724	697	666	542	574	588	631.66	-0.289655	0.0824811	-3.51177	0.000445136	0.0146668
ENSMUSG00000071172	Srsf3	ENSMUSG00000071172.12	1456	1419	1532	1255	1299	1248	1368.29	-0.212474	0.0605956	-3.50643	0.000454164	0.0148883
ENSMUSG00000039804	Ncoa5	ENSMUSG00000039804.15	637	600	563	473	446	517	539.298	-0.324029	0.0925366	-3.50163	0.000462423	0.0150825
ENSMUSG00000037266	Rsrp1	ENSMUSG00000037266.18	2411	2173	2268	2608	2517	2670	2441.33	0.186751	0.0534549	3.49361	0.000476536	0.0154647
ENSMUSG00000022311	Csmd3	ENSMUSG00000022311.15	439	408	413	305	318	352	372.573	-0.367538	0.105273	-3.49127	0.000480724	0.0155226
ENSMUSG00000036098	Myrf	ENSMUSG00000036098.15	766	680	661	550	565	595	636.032	-0.299811	0.0860146	-3.48558	0.000491062	0.0157775
ENSMUSG00000029777	Gars	ENSMUSG00000029777.10	1164	1091	1203	1028	932	968	1064.4	-0.240999	0.069359	-3.47466	0.0005115	0.0163528
ENSMUSG00000027963	Extl2	ENSMUSG00000027963.14	1012	948	1021	836	853	830	916.804	-0.242477	0.0699371	-3.46708	0.00052615	0.0167383
ENSMUSG00000021250	Fos	ENSMUSG00000021250.13	404	306	411	253	270	300	324.008	-0.442337	0.127868	-3.45934	0.000541509	NA
ENSMUSG00000024042	Sik1	ENSMUSG00000024042.6	241	196	198	125	160	150	178.32	-0.538383	0.155702	-3.45778	0.000544649	NA
ENSMUSG00000020428	Gabra6	ENSMUSG00000020428.13	956	938	1051	1382	1241	1027	1098.91	0.307843	0.0890348	3.45756	0.000545098	0.0171658
ENSMUSG00000030284	Creld1	ENSMUSG00000030284.11	663	704	689	597	508	570	621.804	-0.297818	0.0861633	-3.45644	0.000547369	0.0171658
ENSMUSG00000017740	Slc12a5	ENSMUSG00000017740.17	6698	6834	6363	6129	5592	6091	6284.36	-0.160001	0.046292	-3.45634	0.000547561	0.0171658
ENSMUSG00000022443	Myh9	ENSMUSG00000022443.17	1062	1196	931	915	815	872	964.889	-0.295587	0.0855976	-3.45322	0.000553941	0.0172819
ENSMUSG00000063077	Kif1b	ENSMUSG00000063077.14	10668	10713	9933	9399	9182	9760	9942.43	-0.143863	0.0417209	-3.44822	0.000564291	0.0175045
ENSMUSG00000005871	Apc	ENSMUSG00000005871.14	4133	4025	3926	3345	3747	3634	3801.65	-0.170752	0.0495341	-3.44717	0.000566496	0.0175045
ENSMUSG00000004455	Ppp1cc	ENSMUSG00000004455.16	1347	1466	1448	1707	1825	1508	1550.03	0.241477	0.0701023	3.44464	0.000571826	0.017585
ENSMUSG00000024413	Npc1	ENSMUSG00000024413.13	910	908	834	774	639	762	804.662	-0.28815	0.0838646	-3.4359	0.000590596	0.0180762
ENSMUSG00000021373	Cap2	ENSMUSG00000021373.16	2113	2192	2146	1822	1944	1923	2023.45	-0.180422	0.0526264	-3.42835	0.000607254	0.0184983
ENSMUSG00000031765	Mt1	ENSMUSG00000031765.8	1558	1455	1549	1764	1894	1643	1643.74	0.217035	0.0633841	3.42412	0.000616783	0.0187004
ENSMUSG00000097545	Mir124a-1hg	ENSMUSG00000097545.7	1277	1353	1335	1608	1413	1613	1433.29	0.224203	0.0655763	3.41897	0.000628597	0.0189349
ENSMUSG00000025217	Btrc	ENSMUSG00000025217.15	998	1037	1017	804	875	899	938.251	-0.242261	0.0708741	-3.41819	0.000630381	0.0189349
ENSMUSG00000028833	Ncdn	ENSMUSG00000028833.13	11044	11711	10588	10298	9743	10090	10578.9	-0.146484	0.042967	-3.40922	0.00065148	0.0194374
ENSMUSG00000097274	Gm47512	ENSMUSG00000097274.2	2850	3027	2991	2536	2612	2732	2791.32	-0.169689	0.0497836	-3.40853	0.000653132	0.0194374
ENSMUSG00000020604	Arsg	ENSMUSG00000020604.13	338	369	364	286	267	272	315.901	-0.378297	0.111056	-3.40637	0.000658319	NA
ENSMUSG00000033419	Snap91	ENSMUSG00000033419.15	3503	3591	3255	3051	3147	3011	3259.8	-0.16857	0.0494969	-3.40566	0.00066004	0.019515
ENSMUSG00000030884	Uqcrc2	ENSMUSG00000030884.12	1715	1733	1750	1964	1996	1925	1847.27	0.178889	0.0525381	3.40494	0.000661783	0.019515
ENSMUSG00000085001	Rapgef4os2	ENSMUSG00000085001.1	555	605	581	461	463	490	525.745	-0.301003	0.0886691	-3.39468	0.000687084	0.020169
ENSMUSG00000044676	Zfp612	ENSMUSG00000044676.10	618	569	591	716	712	716	653.539	0.270371	0.0797762	3.38911	0.000701196	0.0204901
ENSMUSG00000017677	Wsb1	ENSMUSG00000017677.11	956	901	963	1052	1094	1169	1022.37	0.23574	0.0696469	3.38479	0.000712339	0.020722
ENSMUSG00000034891	Sncb	ENSMUSG00000034891.13	2682	2971	2849	3230	3149	3175	3009.29	0.167455	0.0495478	3.37966	0.000725766	0.0210179
ENSMUSG00000021451	Sema4d	ENSMUSG00000021451.16	941	997	926	792	799	832	881.261	-0.2409	0.0713659	-3.37557	0.000736638	0.0211731
ENSMUSG00000046658	Zfp316	ENSMUSG00000046658.16	256	261	281	315	385	349	307.784	0.396443	0.117522	3.37335	0.000742583	NA
ENSMUSG00000002957	Ap2a2	ENSMUSG00000002957.11	1936	2054	1860	1790	1611	1692	1823.76	-0.201501	0.0597858	-3.37038	0.000750642	0.0211731
ENSMUSG00000056258	Kcnq3	ENSMUSG00000056258.9	1771	1803	1887	1546	1558	1667	1705.38	-0.193671	0.0574649	-3.37025	0.000750993	0.0211731
ENSMUSG00000090327	Gm17111	ENSMUSG00000090327.1	492	519	423	440	292	336	416.989	-0.431103	0.127928	-3.36988	0.000752009	0.0211731
ENSMUSG00000026356	Dars	ENSMUSG00000026356.15	545	531	515	642	643	645	586.849	0.279028	0.0828081	3.36957	0.000752855	0.0211731
ENSMUSG00000010376	Nedd8	ENSMUSG00000010376.15	840	859	859	998	1053	962	928.305	0.236115	0.070079	3.36927	0.000753688	0.0211731
ENSMUSG00000073702	Rpl31	ENSMUSG00000073702.11	1756	1830	1897	2248	2124	1951	1967.68	0.20413	0.0605885	3.36912	0.000754073	0.0211731
ENSMUSG00000038056	Kmt2c	ENSMUSG00000038056.15	1523	1450	1377	1247	1255	1266	1353.11	-0.206691	0.0615579	-3.35766	0.000786048	0.0219753
ENSMUSG00000038690	Atp5j2	ENSMUSG00000038690.15	863	845	859	1095	1030	932	937.028	0.249721	0.0744957	3.35216	0.000801837	0.0223201
ENSMUSG00000029765	Plxna4	ENSMUSG00000029765.12	1212	1172	1147	1022	992	1026	1094.94	-0.215891	0.0644468	-3.34991	0.00080838	0.0224056
ENSMUSG00000022452	Smdt1	ENSMUSG00000022452.15	842	1010	961	1117	1135	1092	1026.04	0.247853	0.0740735	3.34604	0.000819735	0.0226233
ENSMUSG00000070733	Fryl	ENSMUSG00000070733.13	999	996	915	822	802	840	895.726	-0.239722	0.0717245	-3.34226	0.000830995	0.0228365
ENSMUSG00000097971	Gm26917	ENSMUSG00000097971.3	242	192	213	156	143	159	184.28	-0.496262	0.148797	-3.33516	0.000852492	NA
ENSMUSG00000070436	Serpinh1	ENSMUSG00000070436.12	304	321	314	231	236	249	275.778	-0.391355	0.117357	-3.33474	0.000853805	NA
ENSMUSG00000038244	Mical2	ENSMUSG00000038244.13	1767	1972	1865	1624	1549	1702	1746.54	-0.201876	0.0605586	-3.33357	0.000857387	0.0234619
ENSMUSG00000034275	Igsf9b	ENSMUSG00000034275.18	1585	1601	1393	1344	1178	1361	1410.4	-0.238642	0.0719753	-3.31561	0.000914448	0.0249177
ENSMUSG00000001930	Vwf	ENSMUSG00000001930.17	209	261	187	144	140	171	185.245	-0.528791	0.159639	-3.31241	0.000924965	NA
ENSMUSG00000037625	Cldn11	ENSMUSG00000037625.7	2375	2603	2502	2386	1958	2104	2321.23	-0.216333	0.065344	-3.31069	0.000930672	0.0252533
ENSMUSG00000018707	Dync1h1	ENSMUSG00000018707.13	7268	7644	6309	5433	4641	5847	6190.45	-0.414602	0.125312	-3.30855	0.000937797	0.0253401
ENSMUSG00000085438	1700020I14Rik	ENSMUSG00000085438.1	6393	6173	6327	6671	7406	6846	6636.13	0.147788	0.0447575	3.30197	0.000960082	0.0258039
ENSMUSG00000022197	Pdzd2	ENSMUSG00000022197.16	644	712	694	505	580	589	620.486	-0.289548	0.0877188	-3.30086	0.000963877	0.0258039
ENSMUSG00000078887	Gm6710	ENSMUSG00000078887.10	83	13	63	12	8	6	30.7886	-2.6502	0.80291	-3.30075	0.00096428	NA
ENSMUSG00000041697	Cox6a1	ENSMUSG00000041697.8	3444	3987	3665	4367	4352	3935	3958.25	0.188599	0.0571516	3.29997	0.000966948	0.0258039
ENSMUSG00000026933	Camsap1	ENSMUSG00000026933.17	1252	1247	1114	1023	1044	1027	1117.78	-0.224031	0.0679448	-3.29726	0.000976346	0.0259475
ENSMUSG00000046785	Epm2aip1	ENSMUSG00000046785.8	2204	2200	2143	1802	1884	2053	2047.72	-0.188394	0.057165	-3.29562	0.000982032	0.0259917
ENSMUSG00000091542	Gm17167	ENSMUSG00000091542.1	9	14	4	0	0	1	4.72435	-4.67942	1.42177	-3.29128	0.00099734	NA
ENSMUSG00000021794	Glud1	ENSMUSG00000021794.16	2456	2263	2438	2664	2734	2636	2531.77	0.167522	0.0509139	3.2903	0.0010008	0.0263804
ENSMUSG00000034187	Nsf	ENSMUSG00000034187.18	7924	8235	7784	7211	7257	7452	7643.82	-0.127204	0.0387009	-3.28685	0.00101314	0.0265969
ENSMUSG00000036427	Gpi1	ENSMUSG00000036427.5	5642	5885	5470	5286	4890	5168	5390.25	-0.148145	0.0450887	-3.28563	0.00101753	0.0266041
ENSMUSG00000004961	Syt5	ENSMUSG00000004961.7	1034	1149	1159	970	927	958	1032.89	-0.228811	0.0697215	-3.28178	0.00103153	0.0268614
ENSMUSG00000058135	Gstm1	ENSMUSG00000058135.12	875	872	804	1015	1053	945	927.341	0.239847	0.0731243	3.27999	0.00103811	0.0269241
ENSMUSG00000098975	Gm27177	ENSMUSG00000098975.7	208	69	102	12	4	33	71.0664	-2.9653	0.904076	-3.27992	0.00103836	NA
ENSMUSG00000026426	Arl8a	ENSMUSG00000026426.10	1497	1589	1561	1704	1785	1791	1654.43	0.184628	0.0563349	3.27733	0.00104795	0.0270705
ENSMUSG00000025777	Gdap1	ENSMUSG00000025777.8	1225	1230	1304	1404	1491	1421	1345.99	0.20011	0.061144	3.27277	0.001065	0.0274014
ENSMUSG00000063316	Rpl27	ENSMUSG00000063316.13	1191	1134	1198	1356	1384	1312	1262.49	0.201939	0.0617707	3.26918	0.0010786	0.0276412
ENSMUSG00000035383	Pmch	ENSMUSG00000035383.7	138	140	124	173	181	220	162.606	0.51728	0.158776	3.25792	0.00112232	NA
ENSMUSG00000030357	Fkbp4	ENSMUSG00000030357.10	1676	1712	1785	1567	1490	1496	1620.99	-0.185423	0.056922	-3.2575	0.00112399	0.0285785
ENSMUSG00000075706	Gpx4	ENSMUSG00000075706.10	1715	1740	1851	2122	2083	1875	1897.55	0.195457	0.0600263	3.25619	0.00112918	0.0285785
ENSMUSG00000031197	Vbp1	ENSMUSG00000031197.11	715	680	715	834	851	811	767.623	0.242611	0.0745262	3.25538	0.0011324	0.0285785
ENSMUSG00000020577	Tspan13	ENSMUSG00000020577.17	1674	1604	1710	1505	1401	1468	1560.18	-0.190181	0.0584226	-3.25526	0.00113288	0.0285785
ENSMUSG00000051586	Mical3	ENSMUSG00000051586.16	1421	1488	1271	1175	1228	1182	1294.4	-0.221206	0.0680797	-3.24923	0.0011572	0.0290785
ENSMUSG00000045095	Magi1	ENSMUSG00000045095.16	1274	1262	1208	1038	1055	1137	1162.53	-0.211832	0.0654097	-3.23854	0.00120144	0.0300733
ENSMUSG00000045038	Prkce	ENSMUSG00000045038.14	3702	4033	3698	3319	3426	3503	3613.36	-0.157767	0.0487505	-3.23622	0.00121123	0.0302013
ENSMUSG00000020814	Mxra7	ENSMUSG00000020814.13	131	142	137	199	189	187	164.184	0.483868	0.150093	3.22379	0.00126506	NA
ENSMUSG00000032777	Gtf3c1	ENSMUSG00000032777.9	1322	1350	1252	1156	1080	1164	1220.64	-0.207268	0.0644358	-3.21665	0.00129695	0.0322143
ENSMUSG00000051853	Arf3	ENSMUSG00000051853.10	9406	10219	9252	8554	8893	8776	9183.35	-0.139063	0.0432559	-3.21489	0.00130496	0.032289
ENSMUSG00000023915	Tnfrsf21	ENSMUSG00000023915.4	1052	1068	986	891	884	891	962.247	-0.220365	0.0685707	-3.21369	0.00131043	0.0323006
ENSMUSG00000022285	Ywhaz	ENSMUSG00000022285.17	7489	7885	7394	7109	6693	6964	7255.73	-0.133322	0.0415012	-3.21248	0.00131594	0.032313
ENSMUSG00000023169	Slc38a1	ENSMUSG00000023169.15	3337	3301	3239	2941	3023	2979	3136.53	-0.142857	0.0445085	-3.20966	0.00132893	0.0325085
ENSMUSG00000043079	Synpo	ENSMUSG00000043079.17	1251	1503	1210	1120	1120	1105	1218.39	-0.246274	0.0768549	-3.2044	0.00135343	0.032971
ENSMUSG00000030058	Copg1	ENSMUSG00000030058.17	2975	3098	2853	2672	2546	2750	2815.57	-0.163945	0.051178	-3.20342	0.00135805	0.032971
ENSMUSG00000020482	Ccdc117	ENSMUSG00000020482.4	273	291	295	240	186	220	250.714	-0.416387	0.129993	-3.20315	0.00135935	NA
ENSMUSG00000068739	Sars	ENSMUSG00000068739.13	1756	1809	1805	1645	1524	1578	1685.92	-0.179079	0.0560323	-3.19599	0.00139354	0.033706
ENSMUSG00000055407	Map6	ENSMUSG00000055407.14	1229	1259	1132	1016	1011	1086	1122.23	-0.217406	0.0680989	-3.1925	0.00141048	0.0339884
ENSMUSG00000025151	Maged1	ENSMUSG00000025151.16	4854	4696	4509	4317	3901	4359	4439.46	-0.160816	0.0504414	-3.18818	0.00143173	0.0343721
ENSMUSG00000038248	Sobp	ENSMUSG00000038248.8	797	812	814	644	651	737	742.661	-0.25216	0.079295	-3.18003	0.00147261	0.0352227
ENSMUSG00000030655	Smg1	ENSMUSG00000030655.15	3115	2977	2757	2679	2557	2635	2786.71	-0.169228	0.0532722	-3.17666	0.00148982	0.0355028
ENSMUSG00000040761	Spen	ENSMUSG00000040761.16	1047	1039	947	886	846	864	938.047	-0.225823	0.0711242	-3.17505	0.00149811	0.0355692
ENSMUSG00000013089	Etv5	ENSMUSG00000013089.15	986	1153	1012	858	853	946	968.099	-0.245999	0.0776411	-3.16841	0.00153276	0.0361907
ENSMUSG00000004032	Gstm5	ENSMUSG00000004032.10	872	898	902	1069	1074	975	964.95	0.222128	0.0701224	3.16772	0.00153641	0.0361907
ENSMUSG00000039318	Rab3gap2	ENSMUSG00000039318.12	999	1194	1068	895	878	976	1001.52	-0.246366	0.0777958	-3.16683	0.0015411	0.0361907
ENSMUSG00000025855	Prkar1b	ENSMUSG00000025855.13	6155	6500	6179	5785	5658	5809	6014.1	-0.126865	0.0401664	-3.15848	0.00158593	0.0371085
ENSMUSG00000059248	Sept9	ENSMUSG00000059248.13	567	648	577	488	488	499	544.699	-0.281853	0.0894959	-3.14934	0.00163639	0.0381508
ENSMUSG00000031561	Tenm3	ENSMUSG00000031561.16	1110	990	1034	815	883	952	964.073	-0.238886	0.0759479	-3.1454	0.00165862	0.0385302
ENSMUSG00000086360	Gm16214	ENSMUSG00000086360.1	298	291	312	217	196	264	262.958	-0.410692	0.130806	-3.13971	0.00169115	NA
ENSMUSG00000006920	Ezh1	ENSMUSG00000006920.14	778	772	715	611	651	642	694.963	-0.248786	0.0792472	-3.13936	0.00169317	0.0390544
ENSMUSG00000022973	Synj1	ENSMUSG00000022973.18	4027	4009	3856	3262	3457	3828	3739.87	-0.172134	0.0548311	-3.13934	0.00169329	0.0390544
ENSMUSG00000027350	Chgb	ENSMUSG00000027350.8	4446	4555	4729	4145	4068	4272	4369.36	-0.137007	0.0436599	-3.13805	0.00170074	0.0390868
ENSMUSG00000086040	Wipf3	ENSMUSG00000086040.8	984	1081	902	800	818	879	910.797	-0.247815	0.0791486	-3.131	0.0017421	0.0398953
ENSMUSG00000006575	Rundc3a	ENSMUSG00000006575.14	2333	2292	2420	2701	2581	2568	2482.38	0.155577	0.0497069	3.12989	0.00174869	0.0399048
ENSMUSG00000032265	Fam46a	ENSMUSG00000032265.14	142	115	136	90	82	90	109.094	-0.584753	0.187194	-3.12378	0.00178543	NA
ENSMUSG00000074923	Pak6	ENSMUSG00000074923.10	453	547	487	575	636	608	550.897	0.291033	0.0931774	3.12343	0.00178759	0.0406382
ENSMUSG00000031530	Dusp4	ENSMUSG00000031530.6	162	217	163	139	104	130	152.265	-0.546828	0.175108	-3.1228	0.00179138	NA
ENSMUSG00000022263	Trio	ENSMUSG00000022263.10	2268	2382	2181	1935	2070	2061	2149.64	-0.170723	0.054691	-3.12159	0.00179876	0.0406382
ENSMUSG00000022463	Srebf2	ENSMUSG00000022463.8	2293	2280	2109	1980	1968	2005	2105.93	-0.166435	0.05332	-3.12144	0.00179971	0.0406382
ENSMUSG00000034088	Hdlbp	ENSMUSG00000034088.15	2192	2247	2112	1933	1849	2033	2061.1	-0.172055	0.0551925	-3.11736	0.0018248	0.0410612
ENSMUSG00000042750	Bex2	ENSMUSG00000042750.7	1613	1693	1784	1543	1528	1366	1587.97	-0.199655	0.0642057	-3.10962	0.00187329	0.041806
ENSMUSG00000032572	Col6a4	ENSMUSG00000032572.9	22	22	21	7	8	5	14.3989	-1.64917	0.530518	-3.1086	0.00187979	NA
ENSMUSG00000042453	Reln	ENSMUSG00000042453.14	1455	1552	1463	1364	1203	1327	1393.77	-0.200567	0.0645278	-3.10823	0.00188214	0.041806
ENSMUSG00000020074	Ccar1	ENSMUSG00000020074.7	694	697	749	606	577	615	656.343	-0.251264	0.0808393	-3.10819	0.00188236	0.041806
ENSMUSG00000001229	Dpp9	ENSMUSG00000001229.8	719	736	681	619	538	621	652.232	-0.264845	0.0852148	-3.10797	0.0018838	0.041806
ENSMUSG00000037851	Iars	ENSMUSG00000037851.13	694	677	678	583	536	597	627.532	-0.255982	0.0824838	-3.10342	0.00191298	0.0423084
ENSMUSG00000056749	Nfil3	ENSMUSG00000056749.7	142	160	170	114	100	113	133.233	-0.527914	0.170157	-3.10251	0.00191885	NA
ENSMUSG00000030224	Strap	ENSMUSG00000030224.10	1260	1354	1294	1098	1192	1111	1218.06	-0.200236	0.0645723	-3.10097	0.0019289	0.0425148
ENSMUSG00000048644	Ctxn1	ENSMUSG00000048644.8	2129	2433	2315	2532	2720	2530	2443.38	0.17787	0.0574035	3.0986	0.00194439	0.0427105
ENSMUSG00000055430	Nap1l5	ENSMUSG00000055430.4	4249	4089	4285	4477	4651	4704	4409.15	0.13266	0.0428689	3.09456	0.00197105	0.0429896
ENSMUSG00000003363	Pld3	ENSMUSG00000003363.15	4008	4368	3941	3710	3541	3808	3895.86	-0.155822	0.0503548	-3.09448	0.0019716	0.0429896
ENSMUSG00000003199	Mpnd	ENSMUSG00000003199.16	497	507	480	674	580	561	549.737	0.287533	0.0929428	3.09366	0.00197707	0.0429896
ENSMUSG00000034593	Myo5a	ENSMUSG00000034593.16	5912	5812	5870	5200	5173	5640	5601.15	-0.135317	0.0437724	-3.09138	0.00199229	0.0431753
ENSMUSG00000047215	Rpl9	ENSMUSG00000047215.14	1693	1642	1830	1947	2005	1892	1834.82	0.178682	0.0579306	3.0844	0.0020396	0.0440526
ENSMUSG00000019726	Lyst	ENSMUSG00000019726.12	828	896	782	700	688	731	770.789	-0.24206	0.0785826	-3.08032	0.00206776	0.0444236
ENSMUSG00000039474	Wfs1	ENSMUSG00000039474.13	846	901	740	692	717	671	761.133	-0.258609	0.083966	-3.07992	0.00207053	0.0444236
ENSMUSG00000027651	Rprd1b	ENSMUSG00000027651.16	381	346	354	284	282	289	322.695	-0.337218	0.109516	-3.07916	0.00207587	NA
ENSMUSG00000110631	Gm42047	ENSMUSG00000110631.1	71	34	76	32	22	34	44.8548	-1.04311	0.339139	-3.07575	0.00209974	NA
ENSMUSG00000022054	Nefm	ENSMUSG00000022054.11	7016	6768	5893	5983	5767	5766	6198.71	-0.168096	0.054674	-3.07452	0.00210844	0.0450871
ENSMUSG00000034994	Eef2	ENSMUSG00000034994.10	11565	11777	10921	10980	10203	10035	10913.4	-0.134791	0.0438889	-3.07119	0.00213204	0.0454413
ENSMUSG00000064345	mt-Nd2	ENSMUSG00000064345.1	32492	33445	35459	37945	38862	34781	35497.3	0.138113	0.0451055	3.06199	0.00219868	0.0467076
ENSMUSG00000009863	Sdhb	ENSMUSG00000009863.14	857	938	889	1083	1079	972	969.641	0.222134	0.0726524	3.05749	0.00223197	0.0472593
ENSMUSG00000005667	Mthfd2	ENSMUSG00000005667.8	128	116	118	88	85	67	100.234	-0.600794	0.196577	-3.05628	0.00224099	NA
ENSMUSG00000017485	Top2b	ENSMUSG00000017485.11	1331	1288	1391	1466	1620	1491	1431.2	0.191735	0.0627516	3.05545	0.0022472	0.0474263
ENSMUSG00000085925	Rtl1	ENSMUSG00000085925.3	83	93	72	48	37	60	65.6726	-0.769775	0.25246	-3.0491	0.00229526	NA
ENSMUSG00000055945	Prr18	ENSMUSG00000055945.8	906	930	829	784	728	761	823.2	-0.23137	0.0759309	-3.04711	0.00231053	0.048604
ENSMUSG00000038013	Wipf2	ENSMUSG00000038013.14	906	962	891	776	809	785	854.829	-0.219307	0.0720793	-3.04259	0.00234555	0.0491804
ENSMUSG00000035954	Dock4	ENSMUSG00000035954.10	1339	1361	1331	1164	1127	1240	1260.26	-0.190932	0.0628885	-3.03603	0.00239712	0.0499507
ENSMUSG00000025487	Psmd13	ENSMUSG00000025487.15	497	465	538	625	592	593	551.575	0.270748	0.0891805	3.03595	0.00239776	0.0499507
ENSMUSG00000090053	Palm2	ENSMUSG00000090053.9	129	141	116	76	72	104	106.238	-0.607527	0.200255	-3.03376	0.00241525	NA
ENSMUSG00000040044	Orc3	ENSMUSG00000040044.11	378	370	383	450	486	449	419.252	0.294218	0.0971944	3.02711	0.00246907	0.0509973
ENSMUSG00000102869	2900097C17Rik	ENSMUSG00000102869.2	11561	11751	11184	12071	12617	12587	11961.9	0.111954	0.0369867	3.02687	0.00247097	0.0509973
ENSMUSG00000023236	Scg5	ENSMUSG00000023236.7	1425	1476	1661	1675	1845	1718	1633.4	0.199903	0.0660462	3.02672	0.00247224	0.0509973
ENSMUSG00000046607	Hrk	ENSMUSG00000046607.6	346	384	392	432	462	492	418.004	0.306463	0.101299	3.02533	0.00248362	0.0509973
ENSMUSG00000025583	Rptor	ENSMUSG00000025583.15	924	936	879	824	732	789	847.252	-0.225842	0.0746618	-3.02486	0.00248748	0.0509973
ENSMUSG00000031728	Zfp821	ENSMUSG00000031728.10	191	183	180	262	224	249	214.952	0.40597	0.13425	3.024	0.00249459	NA
ENSMUSG00000061859	Patj	ENSMUSG00000061859.16	572	543	492	710	658	588	593.796	0.282376	0.0934487	3.02172	0.00251343	0.0513663
ENSMUSG00000021708	Rasgrf2	ENSMUSG00000021708.17	1394	1284	1316	1080	1202	1191	1244.55	-0.199247	0.0661944	-3.01003	0.00261222	0.0532169
ENSMUSG00000005696	Sh2d1a	ENSMUSG00000005696.11	158	172	173	132	119	110	143.97	-0.488433	0.16246	-3.00649	0.00264286	NA
ENSMUSG00000070461	9230112E08Rik	ENSMUSG00000070461.3	129	123	144	91	83	95	110.843	-0.554577	0.184482	-3.00613	0.00264593	NA
ENSMUSG00000037996	Slc24a2	ENSMUSG00000037996.17	6242	6405	6095	5300	5728	5963	5955.45	-0.140799	0.0468621	-3.00454	0.00265985	0.0540168
ENSMUSG00000062098	Btbd3	ENSMUSG00000062098.11	1980	2064	2054	2409	2278	2158	2157.02	0.165011	0.0549578	3.00251	0.00267763	0.0542072
ENSMUSG00000028937	Acot7	ENSMUSG00000028937.14	2491	2443	2334	2282	2060	2156	2294.3	-0.162837	0.0542693	-3.00053	0.00269509	0.0543903
ENSMUSG00000003545	Fosb	ENSMUSG00000003545.3	197	216	216	144	138	178	181.484	-0.451625	0.150614	-2.99855	0.00271266	NA
ENSMUSG00000047789	Slc38a9	ENSMUSG00000047789.5	312	317	283	219	241	247	269.912	-0.362582	0.121057	-2.99513	0.00274327	NA
ENSMUSG00000061751	Kalrn	ENSMUSG00000061751.16	4186	4222	4089	3630	3824	3924	3979.07	-0.134469	0.0448967	-2.99508	0.00274375	0.0551997
ENSMUSG00000029106	Add1	ENSMUSG00000029106.14	4064	4149	3929	3735	3679	3694	3874.9	-0.128616	0.0430662	-2.98648	0.00282208	0.0565994
ENSMUSG00000027248	Pdia3	ENSMUSG00000027248.13	2012	2051	2024	1700	1944	1740	1911.58	-0.176127	0.0590656	-2.98188	0.00286483	0.0571999
ENSMUSG00000032452	Clstn2	ENSMUSG00000032452.12	883	954	828	777	646	802	814.952	-0.262208	0.0879716	-2.9806	0.00287685	0.0571999
ENSMUSG00000036298	Slc2a13	ENSMUSG00000036298.10	1295	1436	1346	1142	1084	1287	1265.06	-0.214853	0.0720953	-2.98012	0.00288131	0.0571999
ENSMUSG00000013698	Pea15a	ENSMUSG00000013698.12	5394	5224	5530	6082	5951	5637	5636.12	0.129611	0.0435022	2.97942	0.0028879	0.0571999
ENSMUSG00000038612	Mcl1	ENSMUSG00000038612.16	843	789	856	727	684	716	769.19	-0.22581	0.0758125	-2.97853	0.00289631	0.0571999
ENSMUSG00000097023	Mir9-3hg	ENSMUSG00000097023.8	180	162	169	216	211	258	199.418	0.4255	0.143006	2.9754	0.00292611	NA
ENSMUSG00000026116	Tmem131	ENSMUSG00000026116.11	839	805	794	689	692	708	754.595	-0.221691	0.0746545	-2.96956	0.00298229	0.0587183
ENSMUSG00000025374	Nabp2	ENSMUSG00000025374.13	508	530	471	445	414	376	457.266	-0.29327	0.0990038	-2.96221	0.00305437	0.0596868
ENSMUSG00000005198	Polr2a	ENSMUSG00000005198.15	902	929	848	764	709	813	827.655	-0.229586	0.0775075	-2.96212	0.00305533	0.0596868
ENSMUSG00000009569	Mkl2	ENSMUSG00000009569.14	1608	1783	1456	1270	1353	1511	1496.66	-0.228405	0.0771188	-2.96173	0.0030592	0.0596868
ENSMUSG00000067786	Nnat	ENSMUSG00000067786.16	1693	1590	1783	1928	1868	1905	1794.54	0.170583	0.0576414	2.95938	0.00308261	0.0599624
ENSMUSG00000005142	Man2b1	ENSMUSG00000005142.10	410	400	412	341	337	315	369.124	-0.302897	0.102535	-2.9541	0.00313583	0.0608143
ENSMUSG00000017404	Rpl19	ENSMUSG00000017404.12	403	367	420	507	517	442	442.576	0.300093	0.101678	2.95142	0.00316319	0.0611614
ENSMUSG00000039952	Dag1	ENSMUSG00000039952.15	1237	1322	1226	1130	1021	1146	1180.3	-0.200077	0.0679228	-2.94565	0.00322273	0.0621265
ENSMUSG00000030678	Maz	ENSMUSG00000030678.7	1329	1431	1339	1574	1492	1570	1455.99	0.176565	0.0600298	2.9413	0.00326841	0.0626702
ENSMUSG00000026781	Acbd5	ENSMUSG00000026781.17	998	997	1001	1118	1196	1111	1070.21	0.193454	0.0657929	2.94034	0.00327847	0.0626702
ENSMUSG00000023026	Dip2b	ENSMUSG00000023026.16	960	976	970	866	783	864	903.194	-0.210456	0.0715788	-2.9402	0.00328005	0.0626702
ENSMUSG00000020361	Hspa4	ENSMUSG00000020361.13	2846	2862	2834	2536	2652	2579	2717.99	-0.136819	0.0466017	-2.93592	0.00332563	0.0632411
ENSMUSG00000025104	Hdgfl3	ENSMUSG00000025104.13	1222	1141	1211	1286	1370	1408	1273.11	0.187434	0.0638578	2.93517	0.00333361	0.0632411
ENSMUSG00000018830	Myh11	ENSMUSG00000018830.10	207	236	211	154	172	164	190.387	-0.417246	0.142178	-2.93468	0.00333894	NA
ENSMUSG00000049775	Tmsb4x	ENSMUSG00000049775.16	3577	3593	4150	4322	4392	4020	4008.99	0.169701	0.0578347	2.93424	0.00334365	0.0632411
ENSMUSG00000062963	Ufc1	ENSMUSG00000062963.10	506	446	485	565	582	574	526.051	0.261943	0.0893032	2.93319	0.00335501	0.0632411
ENSMUSG00000024160	Spsb3	ENSMUSG00000024160.16	408	424	433	547	538	461	468.649	0.287652	0.0980801	2.93283	0.00335889	0.0632411
ENSMUSG00000024501	Dpysl3	ENSMUSG00000024501.19	704	750	704	605	586	640	664.721	-0.236561	0.0807086	-2.93105	0.00337814	0.0634186
ENSMUSG00000100113	Gm28592	ENSMUSG00000100113.1	192	205	209	162	143	146	176.218	-0.428544	0.146249	-2.93025	0.00338693	NA
ENSMUSG00000097404	Gm10814	ENSMUSG00000097404.1	55	55	35	18	21	32	35.9866	-1.01113	0.345085	-2.93009	0.00338861	NA
ENSMUSG00000024750	Zfand5	ENSMUSG00000024750.10	1401	1394	1350	1523	1624	1523	1469.29	0.172333	0.0588675	2.92748	0.00341726	0.0639672
ENSMUSG00000031960	Aars	ENSMUSG00000031960.14	1851	1843	1745	1634	1507	1682	1710.32	-0.174046	0.0595072	-2.92478	0.00344697	0.0642118
ENSMUSG00000057230	Aak1	ENSMUSG00000057230.13	4933	5271	4982	4680	4488	4729	4847.19	-0.128462	0.0439314	-2.92414	0.00345405	0.0642118
ENSMUSG00000020340	Cyfip2	ENSMUSG00000020340.16	7780	8064	7491	7098	7137	7286	7475.98	-0.116814	0.0399558	-2.92359	0.00346016	0.0642118
ENSMUSG00000020780	Srp68	ENSMUSG00000020780.15	727	694	700	591	613	601	654.268	-0.23117	0.0791381	-2.92109	0.00348808	0.0644227
ENSMUSG00000005580	Adcy9	ENSMUSG00000005580.11	646	678	561	509	550	504	574.689	-0.270316	0.0925491	-2.92079	0.00349147	0.0644227
ENSMUSG00000023106	Denr	ENSMUSG00000023106.15	498	458	500	558	581	600	532.469	0.258204	0.0885822	2.91485	0.0035586	0.0654742
ENSMUSG00000043542	Zc2hc1a	ENSMUSG00000043542.12	550	660	651	695	791	740	681.293	0.258577	0.088769	2.91292	0.00358063	0.0656112
ENSMUSG00000071866	Ppia	ENSMUSG00000071866.12	4176	4114	4682	3693	2706	2525	3649.17	-0.540123	0.185455	-2.91242	0.00358637	0.0656112
ENSMUSG00000026797	Stxbp1	ENSMUSG00000026797.16	9862	10403	9286	8937	8929	9192	9434.78	-0.127176	0.0436902	-2.91087	0.00360429	0.0657529
ENSMUSG00000040111	Gramd1b	ENSMUSG00000040111.16	2574	2563	2355	2225	2212	2299	2371.31	-0.153446	0.0527414	-2.9094	0.00362117	0.0658056
ENSMUSG00000015176	Nolc1	ENSMUSG00000015176.10	653	590	581	538	457	520	556.679	-0.269671	0.0927069	-2.90885	0.00362756	0.0658056
ENSMUSG00000092354	Gm20548	ENSMUSG00000092354.7	258	233	229	166	178	199	210.669	-0.400162	0.137572	-2.90874	0.00362883	NA
ENSMUSG00000047459	Dynlrb1	ENSMUSG00000047459.14	1223	1136	1268	1411	1487	1278	1300.51	0.203466	0.0700895	2.90294	0.00369677	0.0667816
ENSMUSG00000057522	Spop	ENSMUSG00000057522.15	1941	1888	2054	2189	2249	2121	2073.66	0.157491	0.0542605	2.90249	0.00370205	0.0667816
ENSMUSG00000026688	Mgst3	ENSMUSG00000026688.5	441	454	446	530	536	537	490.671	0.258576	0.0891511	2.90042	0.00372659	0.067037
ENSMUSG00000022051	Bnip3l	ENSMUSG00000022051.15	1140	1209	1176	1276	1380	1341	1253.81	0.182109	0.0628304	2.89843	0.0037504	0.0672779
ENSMUSG00000026278	Bok	ENSMUSG00000026278.14	327	351	345	309	258	239	304.965	-0.349332	0.120601	-2.89659	0.00377237	NA
ENSMUSG00000021660	Btf3	ENSMUSG00000021660.14	819	794	898	925	1025	966	904.558	0.217165	0.0750445	2.89382	0.00380582	0.068083
ENSMUSG00000033883	D3Ertd254e	ENSMUSG00000033883.11	232	220	231	281	298	290	258.566	0.348871	0.120588	2.89309	0.0038147	NA
ENSMUSG00000018593	Sparc	ENSMUSG00000018593.13	6167	5700	5645	6630	6390	6174	6117.69	0.13214	0.0457406	2.8889	0.00386592	0.0688792
ENSMUSG00000027347	Rasgrp1	ENSMUSG00000027347.18	3371	3540	3621	2977	3186	3332	3337.73	-0.14877	0.0515053	-2.88843	0.00387166	0.0688792
ENSMUSG00000021680	Crhbp	ENSMUSG00000021680.8	154	158	133	96	119	97	126.14	-0.512547	0.177515	-2.88734	0.00388518	NA
ENSMUSG00000097059	Fam120aos	ENSMUSG00000097059.1	148	117	140	199	174	182	160.016	0.45519	0.157723	2.88601	0.0039016	NA
ENSMUSG00000036751	Cox6b1	ENSMUSG00000036751.7	1164	1168	1267	1357	1325	1402	1280.34	0.182471	0.0632513	2.88486	0.00391583	0.0694736
ENSMUSG00000046062	Ppp1r15b	ENSMUSG00000046062.5	685	790	724	567	612	666	673.914	-0.251406	0.0872495	-2.88147	0.00395831	0.070035
ENSMUSG00000032537	Ephb1	ENSMUSG00000032537.15	595	617	562	525	486	478	543.633	-0.255077	0.0886072	-2.87874	0.00399267	0.0704498
ENSMUSG00000019852	Arfgef3	ENSMUSG00000019852.7	1998	1943	1957	1709	1655	1880	1856.88	-0.168975	0.0587414	-2.87659	0.00401993	0.0707377
ENSMUSG00000063430	Wscd2	ENSMUSG00000063430.9	705	755	682	630	585	608	660.723	-0.234759	0.0816806	-2.87411	0.00405168	0.0711025
ENSMUSG00000079427	Mthfsl	ENSMUSG00000079427.10	57	53	53	90	74	95	70.2959	0.666518	0.232243	2.86991	0.00410583	NA
ENSMUSG00000022797	Tfrc	ENSMUSG00000022797.16	1059	1005	1048	1225	1212	1117	1111.11	0.191372	0.0666966	2.86929	0.00411399	0.0720005
ENSMUSG00000005045	Chd5	ENSMUSG00000005045.16	2730	2761	2501	2296	2323	2526	2522.82	-0.161281	0.0562569	-2.86687	0.00414558	0.0723571
ENSMUSG00000032402	Smad3	ENSMUSG00000032402.12	577	673	572	507	492	521	556.993	-0.263206	0.0918903	-2.86435	0.00417868	0.072687
ENSMUSG00000038416	Cdc16	ENSMUSG00000038416.15	387	423	433	480	526	496	457.588	0.273732	0.095595	2.86346	0.00419042	0.072687
ENSMUSG00000022191	Drosha	ENSMUSG00000022191.16	1062	1023	936	909	824	877	938.228	-0.211957	0.0740366	-2.86287	0.00419824	0.072687
ENSMUSG00000079179	Rab10os	ENSMUSG00000079179.9	715	753	776	612	681	619	692.688	-0.231325	0.0808979	-2.85947	0.00424348	0.0732737
ENSMUSG00000033487	Fndc3a	ENSMUSG00000033487.14	721	766	711	582	608	672	676.587	-0.237712	0.0832123	-2.85669	0.00428084	0.0736597
ENSMUSG00000025224	Gbf1	ENSMUSG00000025224.15	1138	1113	1024	1005	882	953	1019.16	-0.207573	0.0726957	-2.85537	0.00429872	0.0736597
ENSMUSG00000041014	Nrg3	ENSMUSG00000041014.17	304	335	303	334	438	414	354.626	0.335134	0.117374	2.85527	0.00430005	0.0736597
ENSMUSG00000038970	Lmtk2	ENSMUSG00000038970.7	1907	2006	1962	1746	1808	1731	1860.12	-0.152822	0.053578	-2.85233	0.00434007	0.07394
ENSMUSG00000037270	4932438A13Rik	ENSMUSG00000037270.18	1887	1788	1776	1538	1524	1746	1709.99	-0.179675	0.0630025	-2.85187	0.00434628	0.07394
ENSMUSG00000009418	Nav1	ENSMUSG00000009418.15	1290	1211	1184	1063	955	1159	1143.83	-0.213111	0.0747352	-2.85154	0.00435076	0.07394
ENSMUSG00000051695	Pcbp1	ENSMUSG00000051695.6	1421	1493	1487	1314	1329	1275	1386.51	-0.168337	0.0592029	-2.84339	0.00446364	0.0756593
ENSMUSG00000068747	Sort1	ENSMUSG00000068747.14	4818	4975	4861	4309	4515	4633	4685.09	-0.122269	0.0430553	-2.83982	0.00451388	0.0763105
ENSMUSG00000031198	Fundc2	ENSMUSG00000031198.4	445	418	489	523	632	502	501.429	0.295731	0.10423	2.8373	0.00454975	0.0767162
ENSMUSG00000026773	Pfkfb3	ENSMUSG00000026773.19	499	568	497	435	418	445	476.948	-0.270617	0.0954094	-2.83638	0.00456282	0.0767362
ENSMUSG00000026021	Sumo1	ENSMUSG00000026021.15	579	659	645	761	819	670	688.967	0.254728	0.0899076	2.83322	0.00460817	0.0772975
ENSMUSG00000086239	Gm14329	ENSMUSG00000086239.1	74	73	71	52	30	48	58.1866	-0.749223	0.264449	-2.83315	0.00460919	NA
ENSMUSG00000071033	Gm10308	ENSMUSG00000071033.1	301	241	265	176	214	223	236.741	-0.391405	0.138172	-2.83273	0.00461529	NA
ENSMUSG00000052684	Jun	ENSMUSG00000052684.4	653	624	645	591	531	500	590.743	-0.248788	0.0878553	-2.83179	0.00462884	0.0774432
ENSMUSG00000038843	Gcnt1	ENSMUSG00000038843.17	45	53	34	60	97	69	59.6911	0.772757	0.273013	2.83048	0.00464781	NA
ENSMUSG00000003429	Rps11	ENSMUSG00000003429.11	1547	1564	1629	1782	1885	1668	1678.97	0.170392	0.0602591	2.82765	0.00468907	0.0782481
ENSMUSG00000024587	Nars	ENSMUSG00000024587.9	2602	2331	2511	2268	2295	2095	2350.45	-0.161122	0.0569979	-2.8268	0.00470151	0.0782534
ENSMUSG00000032773	Chrm1	ENSMUSG00000032773.9	873	1019	858	760	776	813	849.555	-0.22762	0.0805826	-2.82468	0.00473282	0.0785721
ENSMUSG00000027099	Mtx2	ENSMUSG00000027099.9	298	294	293	338	378	377	329.685	0.308107	0.109112	2.82377	0.00474622	NA
ENSMUSG00000035863	Palm	ENSMUSG00000035863.14	1352	1556	1300	1582	1631	1594	1502.51	0.191184	0.0677678	2.82117	0.00478493	0.0792335
ENSMUSG00000090207	4930524O07Rik	ENSMUSG00000090207.2	747	839	741	662	668	662	719.749	-0.225381	0.079951	-2.81899	0.00481749	0.0795686
ENSMUSG00000026158	Ogfrl1	ENSMUSG00000026158.11	1506	1468	1464	1642	1759	1583	1570.32	0.167856	0.0595717	2.81772	0.00483663	0.0796809
ENSMUSG00000051495	Irf2bp2	ENSMUSG00000051495.7	527	539	490	432	460	399	474.376	-0.269689	0.0958114	-2.81479	0.0048809	0.0800374
ENSMUSG00000026640	Plxna2	ENSMUSG00000026640.12	1436	1451	1372	1200	1241	1325	1337.43	-0.17648	0.0627104	-2.8142	0.00488984	0.0800374
ENSMUSG00000021314	Amph	ENSMUSG00000021314.12	1931	1962	1867	1729	1762	1698	1824.85	-0.150885	0.053624	-2.81375	0.00489668	0.0800374
ENSMUSG00000029648	Flt1	ENSMUSG00000029648.13	891	897	799	783	689	746	800.736	-0.223774	0.0795494	-2.81302	0.00490784	0.0800374
ENSMUSG00000073433	Arhgdig	ENSMUSG00000073433.10	353	355	434	462	469	469	423.591	0.292629	0.104133	2.81014	0.00495193	0.0804561
ENSMUSG00000022799	Arhgap31	ENSMUSG00000022799.4	403	427	374	307	345	325	363.546	-0.300313	0.106884	-2.80972	0.00495843	0.0804561
ENSMUSG00000015501	Hivep2	ENSMUSG00000015501.10	2422	2599	2318	2068	2150	2322	2313.4	-0.165481	0.0589806	-2.80569	0.00502094	0.0812662
ENSMUSG00000034403	Pja1	ENSMUSG00000034403.16	2484	2469	2473	2304	2183	2267	2363.24	-0.137391	0.0489944	-2.80422	0.00504389	0.0814336
ENSMUSG00000020173	Cobl	ENSMUSG00000020173.17	700	855	704	605	668	620	692.028	-0.2543	0.0907461	-2.80232	0.00507365	0.0817098
ENSMUSG00000045009	Prrt3	ENSMUSG00000045009.9	439	475	444	380	369	377	414.055	-0.272973	0.0975192	-2.79917	0.00512345	0.0823065
ENSMUSG00000034799	Unc13a	ENSMUSG00000034799.16	3480	3636	3322	3229	2966	3248	3313.28	-0.145215	0.0518979	-2.79809	0.0051406	0.0823574
ENSMUSG00000027602	Map1lc3a	ENSMUSG00000027602.9	1192	1245	1235	1398	1401	1333	1300.63	0.169867	0.0607238	2.79737	0.00515212	0.0823574
ENSMUSG00000020644	Id2	ENSMUSG00000020644.9	802	789	894	943	1050	903	896.958	0.221849	0.079427	2.79311	0.00522035	0.0832421
ENSMUSG00000023868	Pde10a	ENSMUSG00000023868.16	2046	2288	2158	1980	1851	1984	2051.31	-0.160182	0.057414	-2.78995	0.00527156	0.0838515
ENSMUSG00000041420	Meis3	ENSMUSG00000041420.18	192	161	192	257	225	231	209.749	0.387533	0.138964	2.78873	0.00529144	NA
ENSMUSG00000041571	Selenow	ENSMUSG00000041571.9	4736	5207	5211	5977	5627	5213	5328.58	0.149324	0.0535906	2.78638	0.00533005	0.0845737
ENSMUSG00000055204	Ankrd17	ENSMUSG00000055204.15	1867	1792	1738	1495	1558	1723	1695.64	-0.17437	0.0626087	-2.78508	0.00535151	0.0847061
ENSMUSG00000055447	Cd47	ENSMUSG00000055447.19	1763	1733	1676	1625	1498	1507	1633.67	-0.161233	0.0579207	-2.78368	0.0053746	0.0848365
ENSMUSG00000038530	Rgs4	ENSMUSG00000038530.11	3125	3314	3407	2968	3007	3005	3137.56	-0.132772	0.0477082	-2.78299	0.00538602	0.0848365
ENSMUSG00000031833	Mast3	ENSMUSG00000031833.10	1832	2092	1819	1659	1649	1772	1803.75	-0.177218	0.0637199	-2.78121	0.00541569	0.0850962
ENSMUSG00000079523	Tmsb10	ENSMUSG00000079523.8	1030	1036	1010	1159	1182	1137	1092.49	0.177457	0.063848	2.77937	0.00544637	0.0853706
ENSMUSG00000074582	Arfgef2	ENSMUSG00000074582.10	1112	1115	1018	901	921	1003	1011.61	-0.198804	0.0715501	-2.77853	0.00546048	0.0853844
ENSMUSG00000029632	Ndufa4	ENSMUSG00000029632.7	1738	1663	1899	2050	1968	1930	1874.72	0.16594	0.0597407	2.77768	0.00547489	0.0854031
ENSMUSG00000021033	Gstz1	ENSMUSG00000021033.11	299	251	263	315	343	359	305.148	0.325841	0.117372	2.77614	0.00550078	NA
ENSMUSG00000028649	Macf1	ENSMUSG00000028649.18	5899	5465	5327	4943	4727	5392	5292.31	-0.147677	0.0532243	-2.77461	0.00552678	0.0859573
ENSMUSG00000022858	Tra2b	ENSMUSG00000022858.16	736	706	694	572	633	620	660.085	-0.224883	0.081068	-2.77401	0.00553704	0.0859573
ENSMUSG00000028991	Mtor	ENSMUSG00000028991.15	1286	1320	1169	1081	1061	1164	1180.03	-0.191199	0.0690112	-2.77055	0.00559623	0.086534
ENSMUSG00000015709	Arnt2	ENSMUSG00000015709.9	2701	2759	2676	2432	2519	2477	2593.92	-0.131007	0.0472991	-2.76976	0.00560981	0.086534
ENSMUSG00000033671	Cep350	ENSMUSG00000033671.18	821	802	752	634	644	743	732.665	-0.23084	0.0833627	-2.7691	0.00562115	0.086534
ENSMUSG00000018415	Gid4	ENSMUSG00000018415.14	781	747	687	841	899	830	797.492	0.2151	0.0776895	2.76871	0.0056278	0.086534
ENSMUSG00000103694	Gm37530	ENSMUSG00000103694.1	12	24	11	6	6	1	9.85924	-1.95653	0.708433	-2.76178	0.00574881	NA
ENSMUSG00000001729	Akt1	ENSMUSG00000001729.14	1207	1309	1183	1365	1381	1430	1312.7	0.17455	0.0632172	2.76112	0.00576038	0.0881666
ENSMUSG00000031865	Dctn1	ENSMUSG00000031865.16	3773	3764	3403	3443	3158	3296	3472.98	-0.145213	0.0525932	-2.76107	0.00576127	0.0881666
ENSMUSG00000032187	Smarca4	ENSMUSG00000032187.16	1399	1496	1277	1281	1196	1184	1305.45	-0.190186	0.0689463	-2.75846	0.00580739	0.0883812
ENSMUSG00000057637	Prdm2	ENSMUSG00000057637.13	756	818	753	637	685	679	721.448	-0.216353	0.0784447	-2.75804	0.00581499	0.0883812
ENSMUSG00000108219	Gm44101	ENSMUSG00000108219.1	752	731	709	681	540	630	673.973	-0.245754	0.0891073	-2.75796	0.00581636	0.0883812
ENSMUSG00000103001	A930005N03Rik	ENSMUSG00000103001.1	232	243	208	181	158	183	200.944	-0.387828	0.140715	-2.75613	0.00584906	NA
ENSMUSG00000030738	Eif3c	ENSMUSG00000030738.11	1632	1618	1510	1383	1412	1453	1501.41	-0.163156	0.0592089	-2.7556	0.00585839	0.088811
ENSMUSG00000041977	Arhgef11	ENSMUSG00000041977.18	979	1057	948	845	825	919	928.758	-0.204589	0.0742809	-2.75427	0.00588235	0.0889654
ENSMUSG00000030376	Slc8a2	ENSMUSG00000030376.8	2306	2389	2290	2128	2084	2139	2222.73	-0.137298	0.0499057	-2.75115	0.00593864	0.0895527
ENSMUSG00000015829	Tnr	ENSMUSG00000015829.13	2279	2244	2187	1953	1905	2157	2120.83	-0.157054	0.0570985	-2.75058	0.00594892	0.0895527
ENSMUSG00000042688	Mapk6	ENSMUSG00000042688.16	867	864	849	963	1016	963	920.525	0.189213	0.0689585	2.74386	0.00607207	0.0911941
ENSMUSG00000104346	Pcdhga3	ENSMUSG00000104346.1	125	131	111	90	83	83	103.836	-0.520003	0.189594	-2.74272	0.00609332	NA
ENSMUSG00000033730	Egr3	ENSMUSG00000033730.4	1130	1430	1188	927	859	1077	1101.77	-0.388413	0.141685	-2.7414	0.00611788	0.0916688
ENSMUSG00000022205	Sub1	ENSMUSG00000022205.15	1423	1397	1595	1723	1671	1595	1567.35	0.175304	0.0639785	2.74004	0.0061432	0.0918352
ENSMUSG00000073409	H2-Q6	ENSMUSG00000073409.12	14	29	23	8	6	10	14.9056	-1.46727	0.535771	-2.73862	0.00616978	NA
ENSMUSG00000038390	Gpr162	ENSMUSG00000038390.11	2006	1929	1856	2197	2082	2134	2033.83	0.146976	0.05367	2.73851	0.00617188	0.0919476
ENSMUSG00000033316	Galnt9	ENSMUSG00000033316.14	730	826	712	591	669	664	698.795	-0.235209	0.0859142	-2.73771	0.00618679	0.0919476
ENSMUSG00000060924	Csmd1	ENSMUSG00000060924.15	667	710	701	502	540	675	632.546	-0.271044	0.0990166	-2.73736	0.00619343	0.0919476
ENSMUSG00000021037	Ahsa1	ENSMUSG00000021037.7	754	737	792	641	671	658	708.841	-0.211584	0.0774071	-2.73339	0.00626856	0.0928495
ENSMUSG00000042032	Mat2b	ENSMUSG00000042032.13	877	934	975	1047	1134	1014	996.914	0.19758	0.0723048	2.7326	0.00628368	0.0928505
ENSMUSG00000029478	Ncor2	ENSMUSG00000029478.16	1731	1907	1574	1465	1543	1571	1632.02	-0.18642	0.0682387	-2.73188	0.00629739	0.0928505
ENSMUSG00000022841	Ap2m1	ENSMUSG00000022841.15	4000	3952	3843	3511	3658	3682	3774.32	-0.119525	0.0438079	-2.72838	0.00636454	0.0935959
ENSMUSG00000023809	Rps6ka2	ENSMUSG00000023809.10	623	657	670	525	573	564	602.059	-0.228931	0.0839267	-2.72774	0.00637692	0.0935959
ENSMUSG00000033732	Sf3b3	ENSMUSG00000033732.10	922	942	846	812	721	810	842.135	-0.211331	0.0777671	-2.71748	0.00657811	0.0961293
ENSMUSG00000021819	Zswim8	ENSMUSG00000021819.11	1238	1319	1248	1126	1036	1186	1191.98	-0.184761	0.0679913	-2.71742	0.0065793	0.0961293
ENSMUSG00000044681	Cnpy1	ENSMUSG00000044681.19	663	583	741	939	727	748	733.345	0.278396	0.102508	2.71584	0.00661088	0.0962603
ENSMUSG00000066189	Cacng3	ENSMUSG00000066189.9	562	665	661	500	528	559	579.282	-0.25028	0.0921702	-2.71541	0.00661941	0.0962603
ENSMUSG00000025465	Echs1	ENSMUSG00000025465.13	365	346	352	442	430	412	391.209	0.271242	0.0999151	2.71473	0.00663299	0.0962603
ENSMUSG00000041773	Enc1	ENSMUSG00000041773.8	5867	6948	5750	4953	4911	5469	5649.52	-0.275942	0.101703	-2.71322	0.00666323	0.0964823
ENSMUSG00000022377	Asap1	ENSMUSG00000022377.16	1226	1182	1260	1045	1096	1106	1152.57	-0.173917	0.0641598	-2.71069	0.00671437	0.0970053
ENSMUSG00000100801	Gm15459	ENSMUSG00000100801.1	374	480	429	334	355	355	387.921	-0.298077	0.11003	-2.70904	0.00674779	0.0972706
ENSMUSG00000038349	Plcl1	ENSMUSG00000038349.10	469	544	458	368	429	414	447.013	-0.279368	0.103167	-2.70792	0.00677059	0.0973819
ENSMUSG00000024622	Hmgxb3	ENSMUSG00000024622.7	516	492	469	403	393	436	451.647	-0.259912	0.0960303	-2.70656	0.00679833	0.0975636
ENSMUSG00000028967	Errfi1	ENSMUSG00000028967.10	450	447	416	342	371	374	399.961	-0.271178	0.100273	-2.70441	0.00684267	0.0979822
ENSMUSG00000029598	Plbd2	ENSMUSG00000029598.12	703	706	681	611	599	593	648.624	-0.21381	0.0791485	-2.70138	0.00690531	0.0986604
ENSMUSG00000014294	Ndufa2	ENSMUSG00000014294.4	434	481	436	528	546	532	492.874	0.24688	0.0914424	2.69984	0.00693723	0.0988976
ENSMUSG00000079481	Nhsl2	ENSMUSG00000079481.11	812	756	742	615	696	672	715.477	-0.217582	0.0806644	-2.69737	0.00698901	0.0993785
ENSMUSG00000082229	Nap1l2	ENSMUSG00000082229.1	1429	1406	1411	1266	1287	1253	1341.91	-0.158128	0.0586364	-2.69676	0.00700173	0.0993785
ENSMUSG00000049553	Polr1a	ENSMUSG00000049553.11	412	422	431	382	335	329	385.129	-0.279399	0.103642	-2.69581	0.00702188	0.0994458
ENSMUSG00000043872	Zmym1	ENSMUSG00000043872.14	313	344	343	260	283	264	301.021	-0.307418	0.114087	-2.69459	0.00704743	NA
ENSMUSG00000070802	Pnmal2	ENSMUSG00000070802.5	3815	3693	3592	3367	3243	3535	3540.76	-0.129405	0.0480268	-2.69443	0.00705089	0.099561
ENSMUSG00000031299	Pdha1	ENSMUSG00000031299.10	2121	2145	2246	2381	2443	2335	2278.41	0.136717	0.0507495	2.69396	0.00706085	0.099561
ENSMUSG00000034889	Cactin	ENSMUSG00000034889.8	306	324	315	274	238	250	284.348	-0.315962	0.117341	-2.69269	0.00708782	NA
ENSMUSG00000031691	Tnpo2	ENSMUSG00000031691.14	1934	1856	1815	1717	1652	1693	1777.75	-0.147298	0.0547216	-2.69178	0.00710728	0.0997286
ENSMUSG00000030704	Rab6a	ENSMUSG00000030704.14	5419	5564	5512	5022	5312	4882	5285.08	-0.116401	0.0432473	-2.69153	0.00711254	0.0997286
ENSMUSG00000027035	Cers6	ENSMUSG00000027035.10	556	617	516	500	432	479	516.727	-0.262076	0.0973817	-2.69122	0.00711906	0.0997286
ENSMUSG00000001089	Luzp1	ENSMUSG00000001089.14	1359	1419	1343	1171	1182	1300	1295.86	-0.173092	0.0644	-2.68777	0.00719316	0.100549
ENSMUSG00000016356	Col20a1	ENSMUSG00000016356.18	63	46	56	42	26	26	43.0757	-0.829275	0.308564	-2.68753	0.00719818	NA
ENSMUSG00000034297	Med13	ENSMUSG00000034297.14	1166	1159	1092	955	1070	976	1069.67	-0.185837	0.0692444	-2.68378	0.00727946	0.101485
ENSMUSG00000024608	Rps14	ENSMUSG00000024608.10	2058	2211	2356	2516	2379	2469	2331.47	0.15169	0.0565484	2.68248	0.00730789	0.101485
ENSMUSG00000038473	Nos1ap	ENSMUSG00000038473.14	792	776	793	621	678	730	731.698	-0.21532	0.0802787	-2.68216	0.00731485	0.101485
ENSMUSG00000037012	Hk1	ENSMUSG00000037012.18	3371	3591	3248	3127	2886	3223	3241.01	-0.145221	0.0541508	-2.68179	0.00732298	0.101485
ENSMUSG00000022946	Dopey2	ENSMUSG00000022946.10	1024	968	960	873	853	869	924.483	-0.185261	0.0691091	-2.68071	0.00734671	0.101595
ENSMUSG00000057359	Gm17494	ENSMUSG00000057359.7	46	40	33	83	53	65	53.3793	0.74505	0.278167	2.67843	0.00739681	NA
ENSMUSG00000030659	Nucb2	ENSMUSG00000030659.14	79	98	104	127	125	144	112.679	0.499932	0.186665	2.67824	0.00740109	NA
ENSMUSG00000024140	Epas1	ENSMUSG00000024140.9	1457	1467	1231	1255	1192	1194	1299.37	-0.191617	0.0716359	-2.67488	0.00747568	0.103079
ENSMUSG00000035152	Ap2b1	ENSMUSG00000035152.14	3124	3241	3030	2871	2605	3000	2978.42	-0.148767	0.0556259	-2.67442	0.0074859	0.103079
ENSMUSG00000021720	Rnf180	ENSMUSG00000021720.11	124	131	133	176	166	177	150.972	0.416767	0.155911	2.6731	0.00751528	NA
ENSMUSG00000018196	Glrx2	ENSMUSG00000018196.18	615	592	590	671	701	709	646.426	0.213427	0.0798565	2.67263	0.00752592	0.103409
ENSMUSG00000022354	Ndufb9	ENSMUSG00000022354.4	155	130	156	206	206	175	171.371	0.410534	0.153633	2.67217	0.00753624	NA
ENSMUSG00000054715	Zscan22	ENSMUSG00000054715.11	100	113	101	65	77	71	87.7016	-0.549832	0.205886	-2.67057	0.00757224	NA
ENSMUSG00000021127	Zfp36l1	ENSMUSG00000021127.7	345	332	352	322	254	249	308.859	-0.324372	0.121482	-2.67012	0.0075824	NA
ENSMUSG00000001380	Hars	ENSMUSG00000001380.6	719	725	772	835	831	877	793.02	0.198609	0.074422	2.66869	0.00761475	0.104342
ENSMUSG00000064373	Selenop	ENSMUSG00000064373.12	2311	2306	2225	2548	2564	2403	2392.85	0.135086	0.0506282	2.66819	0.00762614	0.104342
ENSMUSG00000053279	Aldh1a1	ENSMUSG00000053279.7	1066	1062	1006	1287	1200	1093	1119.14	0.19042	0.0714178	2.66628	0.00766955	0.104714
ENSMUSG00000042700	Sipa1l1	ENSMUSG00000042700.16	2965	3038	2790	2483	2776	2689	2790.22	-0.144701	0.0543249	-2.66362	0.00773055	0.105325
ENSMUSG00000052911	Lamb2	ENSMUSG00000052911.9	362	326	322	282	257	278	304.472	-0.305016	0.114519	-2.66346	0.00773413	NA
ENSMUSG00000033880	Lgals3bp	ENSMUSG00000033880.11	157	144	148	113	112	104	129.856	-0.447926	0.168222	-2.6627	0.00775154	NA
ENSMUSG00000055493	Epm2a	ENSMUSG00000055493.4	359	312	357	387	425	435	379.044	0.282551	0.106158	2.6616	0.00777713	0.105693
ENSMUSG00000045284	Dcaf12l1	ENSMUSG00000045284.9	538	509	482	424	422	440	469.223	-0.248518	0.0933975	-2.66087	0.00779402	0.105693
ENSMUSG00000068740	Celsr2	ENSMUSG00000068740.13	2329	2488	2266	2021	2075	2265	2240.43	-0.154329	0.0580115	-2.66032	0.00780665	0.105693
ENSMUSG00000061046	Haghl	ENSMUSG00000061046.9	486	504	499	626	521	624	543.23	0.249574	0.093901	2.65784	0.00786423	0.105788
ENSMUSG00000019478	Rab4a	ENSMUSG00000019478.16	374	372	368	434	448	449	407.545	0.257916	0.0970419	2.65778	0.00786577	0.105788
ENSMUSG00000042216	Sgsm1	ENSMUSG00000042216.13	1130	1319	1138	1030	970	1115	1116.84	-0.20404	0.0767728	-2.65771	0.00786725	0.105788
ENSMUSG00000021360	Gcnt2	ENSMUSG00000021360.16	303	296	292	224	255	233	267.279	-0.319305	0.120145	-2.65767	0.00786831	NA
ENSMUSG00000031065	Cdk16	ENSMUSG00000031065.14	2410	2629	2486	2905	2763	2644	2639.61	0.141944	0.053427	2.65679	0.00788889	0.105788
ENSMUSG00000029208	Guf1	ENSMUSG00000029208.16	423	363	460	523	484	498	458.477	0.271923	0.102361	2.6565	0.0078956	0.105788
ENSMUSG00000029104	Htt	ENSMUSG00000029104.15	1858	1935	1790	1710	1532	1744	1761.59	-0.163948	0.0617766	-2.65389	0.00795698	0.106207
ENSMUSG00000000743	Chmp1a	ENSMUSG00000000743.9	683	623	652	776	750	736	703.406	0.207938	0.0783558	2.65377	0.00795975	0.106207
ENSMUSG00000030516	Tjp1	ENSMUSG00000030516.14	1252	1326	1155	1068	1138	1085	1170.83	-0.181831	0.0685554	-2.65232	0.0079941	0.106246
ENSMUSG00000037972	Snn	ENSMUSG00000037972.7	1515	1535	1613	1686	1805	1692	1640.86	0.153416	0.0578435	2.65225	0.00799563	0.106246
ENSMUSG00000007036	Abhd16a	ENSMUSG00000007036.15	755	761	809	932	862	872	831.825	0.195548	0.0737935	2.64993	0.00805087	0.106761
ENSMUSG00000051344	Plekhm3	ENSMUSG00000051344.13	635	568	575	514	490	508	548.277	-0.233344	0.0881079	-2.64839	0.00808757	0.106931
ENSMUSG00000064343	mt-Tq	ENSMUSG00000064343.1	756	805	560	573	447	388	588.076	-0.593011	0.223946	-2.64801	0.0080968	0.106931
ENSMUSG00000048537	Phldb1	ENSMUSG00000048537.16	1871	1753	1807	1678	1514	1676	1716.46	-0.157975	0.0596865	-2.64675	0.00812701	0.107053
ENSMUSG00000028416	Bag1	ENSMUSG00000028416.12	743	777	798	873	913	864	827.82	0.192973	0.0729234	2.64624	0.00813922	0.107053
ENSMUSG00000049387	Cox7b2	ENSMUSG00000049387.10	3	3	6	0	0	0	1.99541	-4.43982	1.67827	-2.64548	0.00815752	NA
ENSMUSG00000021917	Spcs1	ENSMUSG00000021917.16	522	565	579	672	706	591	606.002	0.239126	0.0904318	2.64427	0.00818676	0.10746
ENSMUSG00000059291	Rpl11	ENSMUSG00000059291.15	1625	1630	1926	2038	1941	1881	1840.21	0.177257	0.0670864	2.64222	0.00823652	0.107893
ENSMUSG00000022577	Ly6h	ENSMUSG00000022577.17	1143	1214	1199	1348	1284	1356	1257.46	0.164092	0.0621468	2.64039	0.00828115	0.108258
ENSMUSG00000041453	Rpl21	ENSMUSG00000041453.12	214	268	273	330	267	381	288.891	0.370462	0.140308	2.64035	0.00828193	NA
ENSMUSG00000037331	Larp1	ENSMUSG00000037331.15	1645	1554	1523	1384	1382	1464	1492.13	-0.15755	0.0596941	-2.63929	0.00830796	0.108389
ENSMUSG00000061576	Dpp6	ENSMUSG00000061576.15	2662	2642	2582	2469	2301	2435	2515.15	-0.130853	0.0496586	-2.63506	0.0084122	0.109528
ENSMUSG00000028195	Cyr61	ENSMUSG00000028195.4	65	48	59	33	35	34	45.8332	-0.753635	0.286131	-2.63389	0.00844137	NA
ENSMUSG00000027091	Zc3h15	ENSMUSG00000027091.14	1246	1319	1337	1126	1160	1191	1229.79	-0.165812	0.0629565	-2.63376	0.00844444	0.109727
ENSMUSG00000021910	Nisch	ENSMUSG00000021910.15	4459	4382	3924	3760	3839	4002	4060.92	-0.137445	0.0522223	-2.63191	0.00849052	0.110104
ENSMUSG00000020220	Vps13d	ENSMUSG00000020220.16	1599	1603	1471	1408	1308	1449	1472.79	-0.166175	0.0631917	-2.6297	0.00854606	0.11049
ENSMUSG00000037805	Rpl10a	ENSMUSG00000037805.14	784	779	841	910	1000	859	862.317	0.204129	0.0776463	2.62896	0.00856476	0.11049
ENSMUSG00000029634	Rnf6	ENSMUSG00000029634.15	758	761	806	650	666	702	723.839	-0.203561	0.0774385	-2.62868	0.00857165	0.11049
ENSMUSG00000043448	Gjc2	ENSMUSG00000043448.13	388	356	277	308	249	242	303.349	-0.358913	0.136628	-2.62694	0.00861575	NA
ENSMUSG00000026313	Hdac4	ENSMUSG00000026313.16	619	636	574	510	524	529	565.405	-0.225898	0.0860682	-2.62464	0.00867403	0.111587
ENSMUSG00000058966	Fam57b	ENSMUSG00000058966.13	3323	3443	3137	3128	2939	2981	3158.42	-0.131154	0.0500291	-2.62155	0.00875312	0.112381
ENSMUSG00000078636	Gm7336	ENSMUSG00000078636.4	1106	1129	1004	993	897	954	1013.77	-0.189004	0.0721395	-2.61998	0.0087935	0.112675
ENSMUSG00000107134	Gm42528	ENSMUSG00000107134.1	70	68	77	114	91	109	88.3878	0.54281	0.207211	2.6196	0.00880339	NA
ENSMUSG00000070493	Chchd2	ENSMUSG00000070493.3	1806	1765	1908	2135	2045	1913	1928.74	0.15229	0.0581851	2.61733	0.00886212	0.11333
ENSMUSG00000029580	Actb	ENSMUSG00000029580.14	5374	5872	5253	5330	4928	4749	5250.88	-0.137654	0.052628	-2.61561	0.00890674	0.113675
ENSMUSG00000075054	Yae1d1	ENSMUSG00000075054.5	263	251	287	330	350	309	298.424	0.304527	0.116465	2.61476	0.00892908	NA
ENSMUSG00000054723	Vmac	ENSMUSG00000054723.5	61	61	62	99	86	90	76.5673	0.570529	0.218265	2.61393	0.00895087	NA
ENSMUSG00000091617	Gm3752	ENSMUSG00000091617.8	1	2	4	13	8	11	6.51668	2.20679	0.844943	2.61176	0.00900764	NA
ENSMUSG00000024826	Dpf2	ENSMUSG00000024826.14	613	651	606	514	544	545	578.823	-0.221081	0.0847144	-2.60972	0.00906154	0.115341
ENSMUSG00000038156	Spon1	ENSMUSG00000038156.16	921	953	900	851	748	827	866.543	-0.194975	0.0747232	-2.60929	0.00907295	0.115341
ENSMUSG00000036199	Ndufa13	ENSMUSG00000036199.9	867	899	939	1078	1046	960	964.996	0.18779	0.0720142	2.60769	0.00911567	0.115558
ENSMUSG00000035171	1110059E24Rik	ENSMUSG00000035171.9	184	199	201	247	242	250	220.521	0.339361	0.130183	2.60679	0.00913947	NA
ENSMUSG00000007817	Zmiz1	ENSMUSG00000007817.15	1539	1608	1523	1409	1421	1380	1479.92	-0.150431	0.0577103	-2.60665	0.00914321	0.115558
ENSMUSG00000086968	4933431E20Rik	ENSMUSG00000086968.8	1423	1462	1458	1578	1646	1586	1525.59	0.147551	0.0566059	2.60663	0.00914369	0.115558
ENSMUSG00000019809	Pex3	ENSMUSG00000019809.16	171	154	161	181	234	217	186.242	0.385948	0.148471	2.59948	0.00933646	NA
ENSMUSG00000024392	Bag6	ENSMUSG00000024392.17	1975	2082	1875	1920	1667	1712	1871.92	-0.164959	0.0634627	-2.59931	0.0093412	0.117823
ENSMUSG00000022517	Mgrn1	ENSMUSG00000022517.17	1909	1856	1770	1663	1674	1675	1758.01	-0.142876	0.0549895	-2.59824	0.00937023	0.117959
ENSMUSG00000027255	Arfgap2	ENSMUSG00000027255.14	605	590	616	716	683	693	650.517	0.206206	0.0794029	2.59696	0.00940533	0.118171
ENSMUSG00000080058	Gm11175	ENSMUSG00000080058.2	980	1116	1008	1170	1145	1201	1103.24	0.178875	0.0689087	2.59583	0.00943637	0.118195
ENSMUSG00000018451	6330403K07Rik	ENSMUSG00000018451.6	1830	1796	1856	2009	1977	2032	1916.86	0.134726	0.0519063	2.59555	0.00944386	0.118195
ENSMUSG00000045968	Teddm2	ENSMUSG00000045968.7	1357	1268	1277	1175	1128	1180	1230.99	-0.162919	0.0628249	-2.59322	0.00950808	0.118762
ENSMUSG00000114003	Gm9616	ENSMUSG00000114003.1	70	85	75	96	112	124	93.6644	0.52752	0.203442	2.59298	0.00951483	NA
ENSMUSG00000096617	Gm5559	ENSMUSG00000096617.3	1680	1791	1546	1619	1398	1413	1574.55	-0.182031	0.0702125	-2.59258	0.00952598	0.118762
ENSMUSG00000096256	Gm21093	ENSMUSG00000096256.1	13	13	10	5	2	3	7.48797	-1.97875	0.763303	-2.59235	0.00953222	NA
ENSMUSG00000025860	Xiap	ENSMUSG00000025860.15	1247	1227	1227	1319	1462	1358	1306.67	0.162457	0.0627109	2.59057	0.00958176	0.119227
ENSMUSG00000089782	Gm3531	ENSMUSG00000089782.1	15	34	22	37	63	38	34.968	0.9542	0.36836	2.5904	0.00958645	NA
ENSMUSG00000107969	Gm44085	ENSMUSG00000107969.1	37	26	39	14	19	17	25.3489	-1.01445	0.391729	-2.58968	0.00960664	NA
ENSMUSG00000097839	Gm26909	ENSMUSG00000097839.1	58	66	51	87	93	83	73.0484	0.58616	0.226375	2.58933	0.00961626	NA
ENSMUSG00000097287	D130017N08Rik	ENSMUSG00000097287.3	261	246	253	204	186	212	227.13	-0.335788	0.129839	-2.58618	0.00970454	NA
ENSMUSG00000016427	Ndufa1	ENSMUSG00000016427.7	445	518	581	583	688	586	566.765	0.266985	0.103242	2.586	0.00970962	0.120293
ENSMUSG00000031822	Gse1	ENSMUSG00000031822.20	709	792	710	582	594	704	681.669	-0.23237	0.0898657	-2.58575	0.00971675	0.120293
ENSMUSG00000049517	Rps23	ENSMUSG00000049517.8	1479	1367	1638	1649	1756	1649	1589.66	0.1737	0.0671835	2.58545	0.00972515	0.120293
ENSMUSG00000018401	Mtmr4	ENSMUSG00000018401.17	1019	1127	975	851	886	977	972.503	-0.200111	0.0774167	-2.58486	0.00974187	0.120293
ENSMUSG00000031144	Syp	ENSMUSG00000031144.15	13108	13974	13398	12982	12230	12564	13042.8	-0.100083	0.0387787	-2.58087	0.00985509	0.12142
ENSMUSG00000105255	Gm42413	ENSMUSG00000105255.1	1462	1411	1453	1341	1282	1269	1369.62	-0.153246	0.0593901	-2.58032	0.00987075	0.12142
ENSMUSG00000027663	Zmat3	ENSMUSG00000027663.12	1235	1223	1171	1075	1079	1087	1145.02	-0.162499	0.0630078	-2.57903	0.00990769	0.121642
ENSMUSG00000024002	Brd4	ENSMUSG00000024002.17	957	912	867	754	768	857	852.452	-0.198669	0.0771007	-2.57675	0.00997351	0.122218
ENSMUSG00000051331	Cacna1c	ENSMUSG00000051331.15	1128	1082	1049	1001	935	953	1024.69	-0.174112	0.0676144	-2.57507	0.0100219	0.122578
ENSMUSG00000062931	Zfp938	ENSMUSG00000062931.15	181	182	204	253	278	204	217.033	0.37279	0.144786	2.57477	0.0100306	NA
ENSMUSG00000036052	Dnajb5	ENSMUSG00000036052.14	1226	1523	1312	1129	1166	1245	1266.95	-0.197778	0.0768408	-2.57386	0.010057	0.122745
ENSMUSG00000029420	Rimbp2	ENSMUSG00000029420.12	1162	1205	1101	1003	984	1081	1089.41	-0.176292	0.068511	-2.57319	0.0100766	0.122745
ENSMUSG00000004040	Stat3	ENSMUSG00000004040.16	671	642	560	537	530	529	578.101	-0.231295	0.0899056	-2.57264	0.0100926	0.122745
ENSMUSG00000001313	Rnd2	ENSMUSG00000001313.12	1322	1330	1340	1450	1527	1452	1403.57	0.15066	0.0585899	2.57143	0.010128	0.122842
ENSMUSG00000019055	Plod1	ENSMUSG00000019055.15	358	358	313	309	255	270	310.474	-0.304276	0.11834	-2.57121	0.0101345	NA
ENSMUSG00000052337	Immt	ENSMUSG00000052337.15	1029	939	976	1054	1116	1153	1044.56	0.177151	0.0689085	2.57082	0.0101459	0.122842
ENSMUSG00000079598	Clec2l	ENSMUSG00000079598.3	349	415	380	476	466	434	419.976	0.261694	0.101828	2.56997	0.0101707	0.122842
ENSMUSG00000042401	Crtac1	ENSMUSG00000042401.6	665	605	548	508	535	498	559.934	-0.237586	0.0924704	-2.56932	0.0101899	0.122842
ENSMUSG00000032330	Cox7a2	ENSMUSG00000032330.7	785	753	787	939	953	796	835.529	0.208028	0.0809723	2.56912	0.0101957	0.122842
ENSMUSG00000006362	Cbfa2t3	ENSMUSG00000006362.16	301	331	277	230	224	271	272.356	-0.325198	0.126632	-2.56806	0.0102269	NA
ENSMUSG00000078875	Gm14419	ENSMUSG00000078875.10	28	12	2	2	6	1	8.55324	-2.24651	0.875138	-2.56704	0.0102572	NA
ENSMUSG00000063681	Crb1	ENSMUSG00000063681.14	31	25	20	8	10	15	18.3022	-1.19643	0.467512	-2.55915	0.010493	NA
ENSMUSG00000097596	Gm26673	ENSMUSG00000097596.1	569	600	545	494	461	507	529.219	-0.229415	0.0896551	-2.55886	0.0105016	0.126293
ENSMUSG00000086774	Gm11915	ENSMUSG00000086774.1	2	2	2	17	8	5	6.05401	2.32833	0.909942	2.55877	0.0105043	NA
ENSMUSG00000038665	Dgki	ENSMUSG00000038665.15	434	406	432	335	353	373	388.897	-0.259724	0.101561	-2.55733	0.0105478	0.126613
ENSMUSG00000047888	Tnrc6b	ENSMUSG00000047888.10	1502	1503	1361	1316	1295	1301	1379.88	-0.158567	0.0620488	-2.55552	0.010603	0.127039
ENSMUSG00000039826	Trub2	ENSMUSG00000039826.13	240	236	233	266	333	285	265.488	0.320993	0.125661	2.55443	0.0106362	NA
ENSMUSG00000037242	Clic4	ENSMUSG00000037242.8	1536	1522	1481	1412	1337	1347	1439.03	-0.148922	0.0583852	-2.55068	0.0107514	0.128407
ENSMUSG00000048379	Socs4	ENSMUSG00000048379.9	267	225	253	204	188	198	222.638	-0.339527	0.133157	-2.54983	0.0107776	NA
ENSMUSG00000059995	Atxn7l3	ENSMUSG00000059995.12	1907	2110	2010	2145	2264	2231	2111.13	0.139778	0.0548238	2.54959	0.0107851	0.128407
ENSMUSG00000005125	Ndrg1	ENSMUSG00000005125.13	1461	1352	1408	1285	1282	1220	1334.82	-0.156829	0.0615178	-2.54933	0.0107929	0.128407
ENSMUSG00000003949	Hlf	ENSMUSG00000003949.16	1440	1590	1658	1276	1456	1417	1472.77	-0.174827	0.068581	-2.54921	0.0107967	0.128407
ENSMUSG00000021241	Isca2	ENSMUSG00000021241.7	232	245	238	330	279	282	267.69	0.313343	0.12298	2.54792	0.0108369	NA
ENSMUSG00000023484	Prph	ENSMUSG00000023484.14	80	62	66	42	52	38	56.5673	-0.667634	0.26214	-2.54686	0.0108697	NA
ENSMUSG00000029686	Cul1	ENSMUSG00000029686.15	1121	1152	1126	1320	1206	1281	1200.99	0.162027	0.0637197	2.54281	0.0109966	0.130544
ENSMUSG00000020522	Mfap3	ENSMUSG00000020522.13	355	368	335	289	295	288	321.528	-0.278077	0.109456	-2.54054	0.0110681	NA
ENSMUSG00000032575	Manf	ENSMUSG00000032575.16	526	698	575	461	512	523	549.025	-0.265062	0.104337	-2.54043	0.0110716	0.131193
ENSMUSG00000091478	Gm10039	ENSMUSG00000091478.2	322	279	212	396	357	296	310.41	0.364274	0.143507	2.53838	0.0111367	NA
ENSMUSG00000024807	Syvn1	ENSMUSG00000024807.17	442	435	421	410	340	329	396.083	-0.271501	0.10697	-2.53811	0.0111454	0.131825
ENSMUSG00000064329	Scn1a	ENSMUSG00000064329.13	2685	2665	2647	2315	2383	2588	2547.31	-0.133209	0.0525254	-2.53608	0.0112101	0.132118
ENSMUSG00000029309	Sparcl1	ENSMUSG00000029309.7	17311	17134	17149	18208	18687	17832	17720.4	0.0850565	0.033539	2.53605	0.011211	0.132118
ENSMUSG00000106847	Peg13	ENSMUSG00000106847.1	3963	3850	3626	3354	3429	3678	3649.97	-0.128179	0.0506026	-2.53305	0.0113074	0.133012
ENSMUSG00000097554	Gm26825	ENSMUSG00000097554.1	564	656	554	529	512	463	546.279	-0.241523	0.0953797	-2.53222	0.0113342	0.133084
ENSMUSG00000052302	Tbc1d30	ENSMUSG00000052302.6	968	1063	925	827	846	914	923.703	-0.191877	0.0758882	-2.52842	0.0114577	0.134163
ENSMUSG00000035735	Dagla	ENSMUSG00000035735.10	1046	1163	1045	965	896	1004	1019.71	-0.184478	0.0729705	-2.52812	0.0114677	0.134163
ENSMUSG00000039166	Akap7	ENSMUSG00000039166.16	378	361	417	453	526	418	425.507	0.273787	0.108345	2.527	0.0115042	0.134347
ENSMUSG00000037428	Vgf	ENSMUSG00000037428.14	2363	2871	2038	1858	1558	1958	2107.78	-0.436447	0.172773	-2.52613	0.0115325	0.134435
ENSMUSG00000026127	Imp4	ENSMUSG00000026127.13	301	310	292	261	219	252	272.338	-0.306511	0.121409	-2.52463	0.0115821	NA
ENSMUSG00000028394	Pole3	ENSMUSG00000028394.9	210	210	213	269	274	247	237.306	0.318586	0.126283	2.52279	0.011643	NA
ENSMUSG00000038068	Rnf144b	ENSMUSG00000038068.15	255	237	241	195	195	194	219.655	-0.327819	0.129967	-2.52233	0.0116581	NA
ENSMUSG00000024176	Sox8	ENSMUSG00000024176.10	483	426	397	356	382	346	398.094	-0.267573	0.106115	-2.52153	0.0116845	0.135777
ENSMUSG00000038984	Tspyl5	ENSMUSG00000038984.4	452	522	439	418	382	385	432.999	-0.257104	0.10197	-2.52138	0.0116897	0.135777
ENSMUSG00000023992	Trem2	ENSMUSG00000023992.14	81	98	90	59	66	58	75.2605	-0.560385	0.222309	-2.52075	0.0117105	NA
ENSMUSG00000022889	Mrpl39	ENSMUSG00000022889.7	244	227	245	306	295	283	266.794	0.301328	0.119617	2.51909	0.0117657	NA
ENSMUSG00000036353	P2ry12	ENSMUSG00000036353.13	209	204	251	309	275	254	250.525	0.334811	0.13297	2.51795	0.011804	NA
ENSMUSG00000090862	Rps13	ENSMUSG00000090862.3	542	494	585	640	663	595	586.371	0.227507	0.0903874	2.51702	0.0118353	0.137222
ENSMUSG00000043424	Eif3j2	ENSMUSG00000043424.10	14	25	23	52	51	22	31.1226	0.998734	0.396943	2.51606	0.0118674	NA
ENSMUSG00000030835	Nomo1	ENSMUSG00000030835.6	1375	1544	1393	1353	1257	1240	1360.42	-0.165969	0.066008	-2.51438	0.0119243	0.138006
ENSMUSG00000027316	Gfra4	ENSMUSG00000027316.15	235	261	228	314	293	288	269.908	0.303706	0.12082	2.5137	0.0119472	NA
ENSMUSG00000009549	Srp14	ENSMUSG00000009549.14	683	674	628	761	744	768	709.658	0.194759	0.0775425	2.51165	0.0120169	0.138829
ENSMUSG00000039001	Rps21	ENSMUSG00000039001.12	1139	1318	964	1453	1502	1363	1289.66	0.335128	0.133468	2.51093	0.0120414	0.138863
ENSMUSG00000037172	E330009J07Rik	ENSMUSG00000037172.14	1567	1535	1567	1397	1440	1392	1482.96	-0.142587	0.0568157	-2.50964	0.0120853	0.139121
ENSMUSG00000100130	Gm28379	ENSMUSG00000100130.1	273	259	233	177	202	223	227.758	-0.341108	0.13605	-2.50722	0.0121686	NA
ENSMUSG00000007617	Homer1	ENSMUSG00000007617.18	2222	2573	2323	1684	1943	2158	2150.39	-0.29879	0.119283	-2.50488	0.0122493	0.140757
ENSMUSG00000037239	Spred3	ENSMUSG00000037239.8	458	487	469	432	374	391	435.299	-0.244995	0.0979393	-2.5015	0.0123667	0.141855
ENSMUSG00000039221	Rpl22l1	ENSMUSG00000039221.10	514	548	567	707	597	608	589.936	0.227223	0.0908988	2.49973	0.0124286	0.141946
ENSMUSG00000032437	Stt3b	ENSMUSG00000032437.10	986	1037	1000	814	922	925	947.336	-0.18165	0.0726845	-2.49916	0.0124487	0.141946
ENSMUSG00000091537	Tma7	ENSMUSG00000091537.2	756	791	831	837	956	920	848.515	0.191582	0.0766668	2.49889	0.0124582	0.141946
ENSMUSG00000007097	Atp1a2	ENSMUSG00000007097.14	15892	15462	14559	15067	13881	13409	14711.7	-0.116628	0.0466846	-2.49822	0.0124819	0.141946
ENSMUSG00000023911	Flywch2	ENSMUSG00000023911.12	63	50	52	74	93	81	68.8769	0.587966	0.235355	2.49821	0.0124823	NA
ENSMUSG00000061578	Ksr2	ENSMUSG00000061578.8	789	767	738	600	651	727	712.088	-0.210418	0.0842298	-2.49814	0.0124845	0.141946
ENSMUSG00000020657	Dnajc27	ENSMUSG00000020657.16	1564	1497	1535	1619	1743	1707	1610.71	0.142777	0.0571698	2.49743	0.0125099	0.141984
ENSMUSG00000097039	Pvt1	ENSMUSG00000097039.8	30	44	30	60	41	77	47.1234	0.769858	0.308404	2.49626	0.0125509	NA
ENSMUSG00000021748	Pdhb	ENSMUSG00000021748.9	1495	1451	1643	1732	1705	1661	1614.45	0.151895	0.0608797	2.49501	0.0125954	0.142584
ENSMUSG00000031224	Magee2	ENSMUSG00000031224.6	63	61	70	91	95	95	79.3965	0.533504	0.21389	2.4943	0.0126207	NA
ENSMUSG00000023272	Creld2	ENSMUSG00000023272.4	149	170	173	113	107	145	142.912	-0.428305	0.171743	-2.49387	0.012636	NA
ENSMUSG00000037843	Vstm2l	ENSMUSG00000037843.6	592	671	579	708	702	718	661.616	0.208032	0.0834254	2.49363	0.0126445	0.142584
ENSMUSG00000001052	Sec24b	ENSMUSG00000001052.15	628	620	575	510	509	549	565.348	-0.216348	0.0867782	-2.49312	0.0126627	0.142584
ENSMUSG00000006403	Adamts4	ENSMUSG00000006403.13	645	585	659	566	503	553	585.226	-0.220713	0.0885434	-2.49271	0.0126771	0.142584
ENSMUSG00000020205	Phlda1	ENSMUSG00000020205.8	256	284	256	208	181	241	237.642	-0.339058	0.136085	-2.49152	0.0127198	NA
ENSMUSG00000029608	Rph3a	ENSMUSG00000029608.10	3793	3938	3549	3421	3436	3519	3609.53	-0.120392	0.0483289	-2.4911	0.0127349	0.142584
ENSMUSG00000078578	Ube2d3	ENSMUSG00000078578.9	2860	2776	2852	2466	2752	2536	2707.11	-0.12958	0.0520179	-2.49106	0.0127362	0.142584
ENSMUSG00000010755	Cars	ENSMUSG00000010755.17	385	375	416	323	328	330	359.7	-0.26016	0.104471	-2.49026	0.0127649	0.142584
ENSMUSG00000026235	Epha4	ENSMUSG00000026235.14	1587	1682	1673	1436	1423	1584	1564.14	-0.152849	0.0613861	-2.48995	0.0127759	0.142584
ENSMUSG00000056755	Grm7	ENSMUSG00000056755.13	558	577	616	471	531	497	541.742	-0.223246	0.0896616	-2.48987	0.012779	0.142584
ENSMUSG00000062444	Ap3b2	ENSMUSG00000062444.14	1186	1211	1113	1063	931	1099	1100.48	-0.18319	0.0735778	-2.48974	0.0127835	0.142584
ENSMUSG00000096929	A330023F24Rik	ENSMUSG00000096929.7	679	642	577	529	498	587	585.244	-0.232149	0.0932893	-2.48849	0.0128288	0.142842
ENSMUSG00000020079	Supv3l1	ENSMUSG00000020079.15	169	175	196	208	237	241	204.189	0.346494	0.139252	2.48825	0.0128373	NA
ENSMUSG00000014077	Chp1	ENSMUSG00000014077.13	1589	1527	1582	1364	1445	1438	1491.04	-0.144266	0.0580181	-2.48657	0.012898	0.143194
ENSMUSG00000002396	Ocel1	ENSMUSG00000002396.8	305	335	330	387	387	389	355.417	0.259638	0.104424	2.48639	0.0129047	0.143194
ENSMUSG00000022708	Zbtb20	ENSMUSG00000022708.16	1615	1456	1461	1303	1269	1454	1426.19	-0.169429	0.0681744	-2.48523	0.0129468	0.143414
ENSMUSG00000038880	Mrps34	ENSMUSG00000038880.13	262	316	282	375	330	348	318.9	0.2873	0.115634	2.48455	0.0129714	NA
ENSMUSG00000063434	Sorcs3	ENSMUSG00000063434.5	460	455	437	398	308	411	411.784	-0.277631	0.111758	-2.48421	0.0129841	0.14356
ENSMUSG00000028465	Tln1	ENSMUSG00000028465.16	706	718	723	629	617	632	670.826	-0.19309	0.0777446	-2.48365	0.0130045	0.14356
ENSMUSG00000096862	Gm13301	ENSMUSG00000096862.1	2	4	10	1	0	0	2.83846	-3.88696	1.56543	-2.483	0.0130281	NA
ENSMUSG00000041729	Coro2b	ENSMUSG00000041729.15	1693	1743	1732	1604	1546	1556	1645.68	-0.136252	0.054903	-2.48169	0.0130763	0.144107
ENSMUSG00000025905	Oprk1	ENSMUSG00000025905.13	93	99	102	147	112	145	116.323	0.458722	0.184848	2.48161	0.013079	NA
ENSMUSG00000022043	Trim35	ENSMUSG00000022043.19	1751	1671	1622	1552	1507	1514	1602.64	-0.14141	0.0570474	-2.47882	0.0131818	0.144933
ENSMUSG00000062296	Trank1	ENSMUSG00000062296.8	2649	2596	2593	2412	2253	2501	2500.5	-0.129004	0.0520595	-2.47801	0.0132116	0.144933
ENSMUSG00000002265	Peg3	ENSMUSG00000002265.16	6493	6379	6090	5610	5255	6334	6026.82	-0.140564	0.0567288	-2.47783	0.0132186	0.144933
ENSMUSG00000021273	Fdft1	ENSMUSG00000021273.10	920	955	913	830	839	803	876.517	-0.174049	0.0703019	-2.47574	0.0132961	0.145536
ENSMUSG00000027884	Clcc1	ENSMUSG00000027884.16	184	183	197	239	225	244	212.122	0.329159	0.133025	2.47441	0.0133457	NA
ENSMUSG00000037750	Fam222b	ENSMUSG00000037750.16	336	347	277	267	253	261	290.114	-0.301444	0.121913	-2.4726	0.0134132	NA
ENSMUSG00000090589	Gm17180	ENSMUSG00000090589.1	298	323	295	267	219	258	276.519	-0.3037	0.122828	-2.47255	0.0134151	NA
ENSMUSG00000025464	Paox	ENSMUSG00000025464.15	58	74	65	111	81	97	80.9223	0.547902	0.221599	2.47249	0.0134174	NA
ENSMUSG00000045039	Megf8	ENSMUSG00000045039.9	2154	2293	2016	2000	1807	2011	2046.92	-0.152426	0.0616691	-2.47168	0.0134479	0.146949
ENSMUSG00000083773	Gm13394	ENSMUSG00000083773.4	102	124	98	97	74	46	89.901	-0.593277	0.240063	-2.47134	0.0134608	NA
ENSMUSG00000061787	Rps17	ENSMUSG00000061787.15	1140	1124	1279	1387	1410	1220	1259.99	0.180407	0.073023	2.47054	0.0134908	0.147168
ENSMUSG00000051451	Crebzf	ENSMUSG00000051451.6	646	694	782	872	834	757	764.163	0.212915	0.0862142	2.46961	0.0135261	0.147304
ENSMUSG00000044864	Ankrd50	ENSMUSG00000044864.16	846	805	804	666	722	758	766.909	-0.191448	0.077593	-2.46734	0.0136122	0.147992
ENSMUSG00000067889	Sptbn2	ENSMUSG00000067889.4	7761	8204	7351	7395	7092	7120	7487.13	-0.110235	0.0446893	-2.46669	0.0136368	0.148009
ENSMUSG00000031386	Hcfc1	ENSMUSG00000031386.14	1230	1261	1180	1082	1066	1139	1159.84	-0.159158	0.0645386	-2.46609	0.0136596	0.148009
ENSMUSG00000021486	Prelid1	ENSMUSG00000021486.7	1239	1259	1161	1361	1372	1334	1287.72	0.152185	0.0617447	2.46474	0.0137112	0.148319
ENSMUSG00000054942	Miga1	ENSMUSG00000054942.13	1173	1212	1191	1241	1341	1409	1261.12	0.160222	0.0650326	2.46371	0.0137507	0.148498
ENSMUSG00000026811	St6galnac6	ENSMUSG00000026811.18	872	931	935	1063	1013	1006	970.081	0.169471	0.0688444	2.46165	0.0138298	0.149104
ENSMUSG00000030898	Cckbr	ENSMUSG00000030898.15	366	418	332	282	299	331	337.972	-0.290063	0.117859	-2.46109	0.0138516	NA
ENSMUSG00000072421	Gm10357	ENSMUSG00000072421.4	3	2	1	15	12	3	6.00448	2.3136	0.94015	2.46089	0.0138594	NA
ENSMUSG00000044349	Snhg11	ENSMUSG00000044349.15	10703	10201	11131	12702	11173	13858	11627.8	0.236197	0.0959893	2.46066	0.0138681	0.149267
ENSMUSG00000009681	Bcr	ENSMUSG00000009681.10	1228	1409	1249	1155	1118	1187	1224.26	-0.16854	0.0685589	-2.45833	0.0139587	0.149657
ENSMUSG00000022507	1810013L24Rik	ENSMUSG00000022507.6	817	745	798	635	705	715	735.883	-0.196734	0.0800361	-2.45806	0.013969	0.149657
ENSMUSG00000029823	Luc7l2	ENSMUSG00000029823.16	2085	1953	2165	2171	2322	2323	2169.97	0.137267	0.0558464	2.45794	0.0139738	0.149657
ENSMUSG00000020444	Guk1	ENSMUSG00000020444.19	512	558	595	609	695	634	600.391	0.219738	0.0894993	2.4552	0.0140808	0.150284
ENSMUSG00000039278	Pcsk1n	ENSMUSG00000039278.10	4432	4891	4487	5021	5069	4868	4794.59	0.114708	0.0467256	2.45493	0.0140913	0.150284
ENSMUSG00000016252	Atp5e	ENSMUSG00000016252.7	794	746	789	938	917	808	832.015	0.191957	0.0782013	2.45465	0.0141022	0.150284
ENSMUSG00000086604	Gm15510	ENSMUSG00000086604.2	27	25	37	54	44	53	40.2113	0.758672	0.309085	2.45458	0.0141051	NA
ENSMUSG00000026895	Ndufa8	ENSMUSG00000026895.7	893	912	968	1038	1004	1076	981.785	0.16966	0.0692089	2.45142	0.0142293	0.151388
ENSMUSG00000025810	Nrp1	ENSMUSG00000025810.9	277	327	287	237	222	261	268.385	-0.306964	0.125266	-2.4505	0.0142658	NA
ENSMUSG00000017418	Arl5b	ENSMUSG00000017418.13	361	397	432	313	334	342	363.123	-0.265532	0.108403	-2.4495	0.0143055	0.151607
ENSMUSG00000018909	Arrb1	ENSMUSG00000018909.15	3105	3328	3004	2785	2912	2952	3014.41	-0.125479	0.0512645	-2.44767	0.0143783	0.151607
ENSMUSG00000028949	Smarcd3	ENSMUSG00000028949.13	805	762	743	916	831	878	822.174	0.183316	0.0749047	2.44732	0.0143921	0.151607
ENSMUSG00000021114	Atp6v1d	ENSMUSG00000021114.9	2092	2114	2097	2156	2400	2345	2200.68	0.132224	0.0540377	2.44688	0.0144098	0.151607
ENSMUSG00000035805	Mlc1	ENSMUSG00000035805.13	1786	1755	1859	2061	1964	1908	1888.75	0.134936	0.0551524	2.4466	0.0144211	0.151607
ENSMUSG00000030428	Ttyh1	ENSMUSG00000030428.16	4411	4227	4059	4623	4653	4435	4401.58	0.110854	0.0453116	2.44649	0.0144255	0.151607
ENSMUSG00000028383	Hsdl2	ENSMUSG00000028383.17	405	435	410	487	477	501	452.623	0.229188	0.0936895	2.44625	0.0144349	0.151607
ENSMUSG00000013662	Atad1	ENSMUSG00000013662.5	1052	1044	1079	1126	1260	1167	1121.14	0.163374	0.0667874	2.44619	0.0144377	0.151607
ENSMUSG00000054499	Dedd2	ENSMUSG00000054499.9	276	314	314	246	250	242	273.607	-0.292301	0.119539	-2.44523	0.014476	NA
ENSMUSG00000038324	Trpc4ap	ENSMUSG00000038324.13	1659	1610	1562	1495	1388	1490	1534.11	-0.144468	0.0590964	-2.44461	0.014501	0.152025
ENSMUSG00000079436	Kcnj13	ENSMUSG00000079436.3	55	54	65	33	40	35	46.9598	-0.685992	0.280716	-2.44372	0.0145367	NA
ENSMUSG00000078812	Eif5a	ENSMUSG00000078812.10	2259	2257	2257	2466	2545	2364	2358.05	0.122802	0.0502791	2.44241	0.0145896	0.152645
ENSMUSG00000033161	Atp1a1	ENSMUSG00000033161.10	9596	10163	10015	9525	8809	9421	9588.24	-0.101608	0.0416178	-2.44145	0.0146284	0.152645
ENSMUSG00000062101	Zfp119b	ENSMUSG00000062101.12	15	20	10	21	50	26	23.5999	1.09378	0.448048	2.44122	0.0146378	NA
ENSMUSG00000027340	Slc23a2	ENSMUSG00000027340.15	1762	1780	1755	1615	1591	1630	1688.95	-0.131348	0.053807	-2.4411	0.0146426	0.152645
ENSMUSG00000026618	Iars2	ENSMUSG00000026618.11	724	689	713	651	582	622	663.476	-0.197656	0.0809996	-2.44021	0.0146788	0.152645
ENSMUSG00000005514	Por	ENSMUSG00000005514.14	708	665	641	562	585	601	627.224	-0.202004	0.0827827	-2.44017	0.0146802	0.152645
ENSMUSG00000037860	Aim2	ENSMUSG00000037860.15	31	30	32	21	15	12	23.5339	-0.983561	0.403125	-2.43984	0.0146938	NA
ENSMUSG00000029661	Col1a2	ENSMUSG00000029661.16	290	265	312	241	249	210	261.056	-0.309231	0.126792	-2.43888	0.0147327	NA
ENSMUSG00000031647	Mfap3l	ENSMUSG00000031647.10	540	591	567	647	667	641	608.864	0.201855	0.0827668	2.43884	0.0147343	0.152645
ENSMUSG00000028106	Rprd2	ENSMUSG00000028106.13	542	572	457	423	447	456	482.786	-0.245224	0.100552	-2.43879	0.0147366	0.152645
ENSMUSG00000028988	Ctnnbip1	ENSMUSG00000028988.13	374	366	354	438	435	421	397.918	0.240401	0.0985872	2.43846	0.01475	0.152645
ENSMUSG00000074829	2010315B03Rik	ENSMUSG00000074829.10	124	121	134	167	150	180	146.024	0.395037	0.162007	2.43839	0.0147528	NA
ENSMUSG00000054263	Lifr	ENSMUSG00000054263.12	493	535	469	443	435	395	461.882	-0.237084	0.0972641	-2.43753	0.0147882	0.152645
ENSMUSG00000029613	Eif2ak1	ENSMUSG00000029613.15	882	843	804	769	739	721	793.073	-0.183112	0.0751284	-2.43732	0.0147965	0.152645
ENSMUSG00000007944	Ttc9b	ENSMUSG00000007944.8	755	922	886	977	966	986	915.269	0.191163	0.0784503	2.43674	0.0148205	0.152649
ENSMUSG00000030257	Srgap3	ENSMUSG00000030257.16	3801	3897	3623	3492	3450	3547	3635.01	-0.110475	0.0453618	-2.43542	0.0148746	0.152731
ENSMUSG00000021134	Srsf5	ENSMUSG00000021134.17	2333	2089	2382	2560	2388	2554	2384.2	0.141306	0.058022	2.43539	0.0148758	0.152731
ENSMUSG00000014602	Kif1a	ENSMUSG00000014602.15	12819	13102	11642	11510	11126	12059	12043	-0.114642	0.0471103	-2.43349	0.0149541	0.153291
ENSMUSG00000040990	Sh3kbp1	ENSMUSG00000040990.17	451	440	392	365	318	386	391.905	-0.263592	0.108362	-2.43252	0.0149941	0.153458
ENSMUSG00000034390	Cmip	ENSMUSG00000034390.16	1367	1469	1319	1117	1236	1328	1305.78	-0.173068	0.0712043	-2.43058	0.0150746	0.153747
ENSMUSG00000045962	Wnk1	ENSMUSG00000045962.16	3099	3091	2947	2826	2763	2856	2930.12	-0.113599	0.0467431	-2.43028	0.0150871	0.153747
ENSMUSG00000045636	Mtus1	ENSMUSG00000045636.16	712	753	798	670	693	609	705.837	-0.200914	0.0826851	-2.42987	0.0151041	0.153747
ENSMUSG00000038608	Dock10	ENSMUSG00000038608.15	780	701	672	630	585	649	669.652	-0.207071	0.0852347	-2.42942	0.015123	0.153747
ENSMUSG00000100252	Mir124-2hg	ENSMUSG00000100252.6	509	510	479	538	585	617	539.493	0.218186	0.089826	2.42898	0.0151414	0.153747
ENSMUSG00000026425	Srgap2	ENSMUSG00000026425.15	1264	1266	1122	1096	1024	1126	1149.6	-0.170116	0.0701993	-2.42332	0.0153793	0.155917
ENSMUSG00000025404	R3hdm2	ENSMUSG00000025404.15	1991	2223	2068	1881	1891	1946	2000.05	-0.135848	0.0560747	-2.42264	0.0154084	0.155968
ENSMUSG00000097417	Gm26669	ENSMUSG00000097417.1	229	232	202	171	174	179	197.881	-0.336154	0.13878	-2.4222	0.015427	NA
ENSMUSG00000021877	Arf4	ENSMUSG00000021877.12	814	850	826	729	734	740	782.319	-0.176915	0.0730627	-2.42141	0.0154603	0.156202
ENSMUSG00000024654	Asrgl1	ENSMUSG00000024654.8	1951	1926	1816	2283	2096	1945	2002.75	0.150171	0.0620367	2.42068	0.0154914	0.156202
ENSMUSG00000052512	Nav2	ENSMUSG00000052512.17	702	725	589	618	506	588	621.3	-0.237372	0.098072	-2.42038	0.0155041	0.156202
ENSMUSG00000031938	4931406C07Rik	ENSMUSG00000031938.15	212	209	230	262	261	279	242.177	0.303477	0.125422	2.41964	0.0155357	NA
ENSMUSG00000069272	Hist1h2ae	ENSMUSG00000069272.6	5	6	8	1	0	1	3.49076	-3.23462	1.33762	-2.41819	0.0155979	NA
ENSMUSG00000022619	Mapk8ip2	ENSMUSG00000022619.5	3727	3726	3528	3466	3352	3367	3527.5	-0.109076	0.0451092	-2.41805	0.0156037	0.156961
ENSMUSG00000060206	Zfp462	ENSMUSG00000060206.11	628	683	613	498	547	604	595.434	-0.220721	0.0913565	-2.41604	0.0156902	0.157585
ENSMUSG00000040724	Kcna2	ENSMUSG00000040724.5	4497	4305	4113	3926	4028	4013	4146.96	-0.109545	0.0453846	-2.41371	0.0157911	0.158352
ENSMUSG00000038065	Mturn	ENSMUSG00000038065.13	1630	1533	1495	1707	1701	1715	1630.01	0.137543	0.0569984	2.41311	0.0158173	0.158369
ENSMUSG00000003402	Prkcsh	ENSMUSG00000003402.14	755	706	682	682	582	595	666.941	-0.207725	0.086104	-2.41249	0.0158438	0.158389
ENSMUSG00000021703	Serinc5	ENSMUSG00000021703.9	1168	1132	1037	992	962	1018	1051.58	-0.16716	0.0693369	-2.41083	0.0159161	0.158866
ENSMUSG00000036273	Lrrk2	ENSMUSG00000036273.15	634	690	621	525	537	611	603.157	-0.214985	0.0892252	-2.40947	0.0159759	0.159137
ENSMUSG00000028811	Yars	ENSMUSG00000028811.11	1065	1015	1045	976	873	934	984.547	-0.168024	0.0697459	-2.40908	0.0159926	0.159137
ENSMUSG00000087341	0610040F04Rik	ENSMUSG00000087341.4	137	134	146	84	109	113	120.734	-0.434486	0.180451	-2.40778	0.0160501	NA
ENSMUSG00000025555	Farp1	ENSMUSG00000025555.14	738	722	646	614	626	594	656.796	-0.200056	0.0831724	-2.40531	0.0161586	0.16009
ENSMUSG00000006476	Nsmf	ENSMUSG00000006476.19	2618	2694	2635	3069	2800	2794	2768.36	0.122971	0.0511252	2.40528	0.01616	0.16009
ENSMUSG00000037685	Atp8a1	ENSMUSG00000037685.15	2574	2582	2510	2185	2257	2523	2438.39	-0.137173	0.0570315	-2.40522	0.0161627	0.16009
ENSMUSG00000007721	Ccdc124	ENSMUSG00000007721.6	566	646	668	734	724	706	674.034	0.201179	0.0836766	2.40425	0.0162059	0.16011
ENSMUSG00000020532	Acaca	ENSMUSG00000020532.18	938	896	857	789	752	833	843.976	-0.179963	0.074858	-2.40406	0.0162143	0.16011
ENSMUSG00000044921	Rassf9	ENSMUSG00000044921.5	18	13	22	37	29	35	25.6558	0.931577	0.38753	2.40388	0.0162219	NA
ENSMUSG00000039105	Atp6v1g1	ENSMUSG00000039105.6	688	670	713	790	808	754	737.039	0.183751	0.0764825	2.40253	0.0162823	0.160536
ENSMUSG00000063550	Nup98	ENSMUSG00000063550.8	410	454	376	348	328	362	379.766	-0.258244	0.107606	-2.39989	0.0163999	0.161449
ENSMUSG00000103670	Gm37622	ENSMUSG00000103670.1	5	7	2	0	1	0	2.60806	-3.78002	1.57552	-2.39922	0.0164301	NA
ENSMUSG00000027950	Chrnb2	ENSMUSG00000027950.7	1424	1484	1334	1319	1240	1264	1344.02	-0.151757	0.0632573	-2.39905	0.0164378	0.161575
ENSMUSG00000038486	Sv2a	ENSMUSG00000038486.9	5730	5692	5419	5387	4878	5321	5404.43	-0.112175	0.0468227	-2.39573	0.0165872	0.162797
ENSMUSG00000037400	Atp11b	ENSMUSG00000037400.17	1056	1022	1038	1110	1130	1244	1100	0.162404	0.0678376	2.39402	0.016665	0.163232
ENSMUSG00000030847	Bag3	ENSMUSG00000030847.8	153	152	125	126	86	105	124.415	-0.446115	0.18636	-2.39383	0.0166734	NA
ENSMUSG00000087006	Gm13889	ENSMUSG00000087006.3	162	160	159	219	204	189	182.015	0.344846	0.144063	2.39371	0.016679	NA
ENSMUSG00000029319	Coq2	ENSMUSG00000029319.8	450	561	519	617	559	620	554.241	0.229539	0.0958955	2.39364	0.0166821	0.163232
ENSMUSG00000005968	Tuft1	ENSMUSG00000005968.14	49	44	43	24	30	26	36.0562	-0.763127	0.319014	-2.39214	0.0167504	NA
ENSMUSG00000025220	Mgea5	ENSMUSG00000025220.7	2384	2302	2393	2133	2187	2197	2266	-0.118562	0.0495734	-2.39164	0.0167732	0.163629
ENSMUSG00000047824	Pygo2	ENSMUSG00000047824.13	457	488	480	393	408	416	440.338	-0.226564	0.0947318	-2.39164	0.0167733	0.163629
ENSMUSG00000092203	1110038B12Rik	ENSMUSG00000092203.7	44	34	36	62	71	49	49.5297	0.671022	0.280617	2.39123	0.0167919	NA
ENSMUSG00000043557	Mdga1	ENSMUSG00000043557.15	407	397	366	312	316	350	357.952	-0.256059	0.107092	-2.39101	0.0168022	0.163663
ENSMUSG00000107155	Gm43793	ENSMUSG00000107155.1	4	3	3	0	0	0	1.66758	-4.17981	1.74885	-2.39003	0.0168471	NA
ENSMUSG00000042063	Zfp386	ENSMUSG00000042063.11	144	142	139	194	204	156	163.018	0.378289	0.158282	2.38996	0.01685	NA
ENSMUSG00000052712	BC004004	ENSMUSG00000052712.16	402	432	407	508	487	460	449.46	0.227722	0.0953087	2.38931	0.0168801	0.164175
ENSMUSG00000019828	Grm1	ENSMUSG00000019828.13	1341	1197	1290	1221	1076	1118	1206.91	-0.165699	0.0694699	-2.38519	0.0170702	0.165525
ENSMUSG00000029446	Psph	ENSMUSG00000029446.14	305	323	360	283	246	284	300.155	-0.283895	0.119033	-2.385	0.0170789	NA
ENSMUSG00000041187	Prkd2	ENSMUSG00000041187.16	78	63	63	55	41	37	56.1416	-0.633547	0.26566	-2.38481	0.0170881	NA
ENSMUSG00000038630	Zkscan16	ENSMUSG00000038630.8	391	326	346	367	440	472	390.444	0.27292	0.114445	2.38472	0.0170921	0.165525
ENSMUSG00000109336	Samd4b	ENSMUSG00000109336.1	752	795	700	624	641	695	701.041	-0.196794	0.082529	-2.38455	0.0171002	0.165525
ENSMUSG00000052229	Gpr17	ENSMUSG00000052229.5	692	725	599	592	551	597	625.926	-0.213859	0.0897025	-2.38409	0.0171215	0.165525
ENSMUSG00000024026	Glo1	ENSMUSG00000024026.12	831	833	835	931	970	905	884.087	0.167207	0.0702367	2.38063	0.0172831	0.166838
ENSMUSG00000025739	Gng13	ENSMUSG00000025739.13	353	309	395	483	432	373	390.926	0.281757	0.118385	2.38001	0.0173123	0.16687
ENSMUSG00000032280	Tle3	ENSMUSG00000032280.16	555	573	555	505	469	484	523.454	-0.208211	0.0875677	-2.37771	0.0174206	0.167663
ENSMUSG00000061898	Rbak	ENSMUSG00000061898.10	113	92	78	120	139	129	111.932	0.453646	0.190884	2.37656	0.0174749	NA
ENSMUSG00000030554	Synm	ENSMUSG00000030554.16	604	556	542	531	454	477	527.391	-0.221343	0.0931487	-2.37624	0.0174902	0.167944
ENSMUSG00000024621	Csf1r	ENSMUSG00000024621.15	754	791	656	680	629	598	684.631	-0.210142	0.0884438	-2.37599	0.0175017	0.167944
ENSMUSG00000020654	Adcy3	ENSMUSG00000020654.15	669	578	553	501	498	542	556.85	-0.222906	0.0938561	-2.37498	0.0175501	0.168158
ENSMUSG00000046480	Scn4b	ENSMUSG00000046480.6	2421	2460	2288	2293	2133	2147	2290.17	-0.126491	0.0532939	-2.37346	0.0176224	0.1686
ENSMUSG00000040703	Cyp2s1	ENSMUSG00000040703.11	71	88	79	52	52	59	66.9328	-0.558877	0.235607	-2.37207	0.0176888	NA
ENSMUSG00000072640	Lyrm9	ENSMUSG00000072640.11	506	524	497	579	576	603	547.347	0.203423	0.0857979	2.37095	0.0177423	0.169452
ENSMUSG00000046364	Rpl27a	ENSMUSG00000046364.14	1445	1338	1513	1592	1605	1554	1507.89	0.145379	0.0613283	2.3705	0.0177638	0.169452
ENSMUSG00000051726	Kcnf1	ENSMUSG00000051726.6	1156	1362	1162	983	1166	1080	1151.37	-0.187801	0.0792533	-2.36963	0.017806	0.169603
ENSMUSG00000037196	Pacrg	ENSMUSG00000037196.6	99	102	96	135	141	122	115.794	0.423724	0.178853	2.36912	0.0178304	NA
ENSMUSG00000038462	Uqcrfs1	ENSMUSG00000038462.3	936	963	1052	1067	1141	1098	1042.65	0.164944	0.0696284	2.36892	0.0178402	0.169679
ENSMUSG00000022372	Sla	ENSMUSG00000022372.14	85	66	102	120	118	113	100.67	0.478312	0.201975	2.36818	0.0178761	NA
ENSMUSG00000102602	A930004J17Rik	ENSMUSG00000102602.1	77	77	69	59	42	48	62.1746	-0.58337	0.24641	-2.36747	0.0179101	NA
ENSMUSG00000044447	Dock5	ENSMUSG00000044447.5	291	295	307	246	230	258	271.071	-0.281799	0.119058	-2.3669	0.0179377	NA
ENSMUSG00000040811	Eml2	ENSMUSG00000040811.15	1483	1579	1419	1634	1594	1728	1572.83	0.145067	0.0613157	2.36591	0.0179858	0.170622
ENSMUSG00000025221	Kcnip2	ENSMUSG00000025221.15	757	796	838	932	897	873	848.898	0.174041	0.0735689	2.36568	0.0179968	0.170622
ENSMUSG00000078435	AU041133	ENSMUSG00000078435.5	30	32	35	61	53	45	42.6834	0.701477	0.296526	2.36565	0.0179984	NA
ENSMUSG00000027366	Sppl2a	ENSMUSG00000027366.12	494	504	462	544	577	566	524.596	0.209145	0.0884247	2.36524	0.0180186	0.170622
ENSMUSG00000049556	Lingo1	ENSMUSG00000049556.5	2008	2468	2152	1963	2029	1956	2096.03	-0.156848	0.0663355	-2.36446	0.0180565	0.17073
ENSMUSG00000033565	Rbfox2	ENSMUSG00000033565.18	3039	3021	2891	2761	2725	2806	2873.69	-0.110455	0.0467258	-2.36389	0.0180841	0.170742
ENSMUSG00000004947	Dtx2	ENSMUSG00000004947.15	93	91	77	59	64	59	73.9319	-0.528411	0.223625	-2.36294	0.0181306	NA
ENSMUSG00000024065	Ehd3	ENSMUSG00000024065.7	944	956	920	865	851	797	888.922	-0.167748	0.0710007	-2.36263	0.018146	0.171075
ENSMUSG00000064061	Dzip3	ENSMUSG00000064061.13	1154	1059	1167	1212	1280	1265	1189.53	0.154374	0.0653582	2.36197	0.0181779	0.171127
ENSMUSG00000019889	Ptprk	ENSMUSG00000019889.10	552	589	579	499	496	499	535.467	-0.203889	0.086413	-2.35947	0.0183009	0.172034
ENSMUSG00000102531	1110002O04Rik	ENSMUSG00000102531.1	0	0	0	2	4	4	1.62345	4.15716	1.76392	2.35678	0.0184341	NA
ENSMUSG00000060780	Lrrtm1	ENSMUSG00000060780.2	549	592	542	486	483	489	523.37	-0.208156	0.0883254	-2.35669	0.0184385	0.17276
ENSMUSG00000047747	Rnf150	ENSMUSG00000047747.10	828	820	834	703	745	750	780.137	-0.17379	0.073744	-2.35667	0.0184398	0.17276
ENSMUSG00000006800	Sulf2	ENSMUSG00000006800.14	898	930	846	748	792	824	839.891	-0.176423	0.0748863	-2.35588	0.0184787	0.17276
ENSMUSG00000103310	Pcdha12	ENSMUSG00000103310.1	78	87	76	46	58	59	67.3016	-0.554762	0.235484	-2.35584	0.0184808	NA
ENSMUSG00000036941	Elac1	ENSMUSG00000036941.2	389	375	385	453	454	438	415.811	0.226983	0.0963527	2.35575	0.0184851	0.17276
ENSMUSG00000030329	Pianp	ENSMUSG00000030329.11	1157	1299	1160	1073	1066	1100	1142.52	-0.159669	0.0678097	-2.35466	0.0185395	0.173018
ENSMUSG00000022245	Skor1	ENSMUSG00000022245.15	22	25	24	36	51	38	32.587	0.803205	0.34114	2.35448	0.0185488	NA
ENSMUSG00000024190	Dusp1	ENSMUSG00000024190.6	393	437	489	364	388	357	404.621	-0.250026	0.106274	-2.35265	0.0186403	0.173707
ENSMUSG00000029752	Asns	ENSMUSG00000029752.12	793	783	817	693	702	723	751.933	-0.175451	0.0746326	-2.35087	0.0187297	0.174289
ENSMUSG00000029016	Clcn6	ENSMUSG00000029016.13	1304	1263	1190	1189	1078	1107	1188.51	-0.156519	0.066606	-2.34993	0.0187771	0.174478
ENSMUSG00000000631	Myo18a	ENSMUSG00000000631.20	1874	2036	1916	1779	1706	1830	1857.05	-0.132819	0.0565505	-2.34868	0.0188402	0.174502
ENSMUSG00000039461	Tcta	ENSMUSG00000039461.12	267	237	232	313	291	293	272.373	0.282704	0.120373	2.34856	0.0188461	NA
ENSMUSG00000038564	Ift172	ENSMUSG00000038564.11	708	679	628	626	541	585	627.829	-0.204175	0.08694	-2.34846	0.0188511	0.174502
ENSMUSG00000032340	Neo1	ENSMUSG00000032340.8	1125	1100	1049	1008	933	992	1034.53	-0.159241	0.0678118	-2.34827	0.0188607	0.174502
ENSMUSG00000024097	Srsf7	ENSMUSG00000024097.10	961	980	1011	866	906	867	931.743	-0.161536	0.0688152	-2.34739	0.0189055	0.174666
ENSMUSG00000040370	Etfrf1	ENSMUSG00000040370.13	283	252	277	298	341	341	298.928	0.274417	0.116992	2.34561	0.0189959	NA
ENSMUSG00000074476	Spc24	ENSMUSG00000074476.6	14	19	8	31	25	27	20.5742	1.03447	0.441184	2.34477	0.019039	NA
ENSMUSG00000040022	Rab11fip2	ENSMUSG00000040022.14	680	637	576	675	733	766	677.78	0.20216	0.0862354	2.34428	0.0190637	0.175877
ENSMUSG00000000957	Mmp14	ENSMUSG00000000957.11	205	178	220	271	253	229	225.893	0.319832	0.136454	2.34388	0.0190841	NA
ENSMUSG00000105975	Gm42609	ENSMUSG00000105975.4	171	204	181	135	150	148	164.854	-0.358742	0.153066	-2.34371	0.0190931	NA
ENSMUSG00000018287	Spag7	ENSMUSG00000018287.12	256	291	280	348	336	315	304.159	0.26816	0.114446	2.34312	0.0191233	NA
ENSMUSG00000029822	Osbpl3	ENSMUSG00000029822.15	313	342	280	217	256	283	281.852	-0.301844	0.128889	-2.3419	0.019186	NA
ENSMUSG00000071654	Uqcc3	ENSMUSG00000071654.5	130	117	113	174	151	147	138.755	0.38954	0.16644	2.34042	0.0192622	NA
ENSMUSG00000037868	Egr2	ENSMUSG00000037868.15	84	119	126	73	81	80	93.7028	-0.493986	0.211151	-2.33949	0.0193099	NA
ENSMUSG00000028370	Pappa	ENSMUSG00000028370.7	60	68	72	48	39	45	55.3573	-0.605903	0.259108	-2.33842	0.0193653	NA
ENSMUSG00000002274	Metrn	ENSMUSG00000002274.12	720	635	634	838	790	677	715.758	0.211411	0.0904105	2.33834	0.0193696	0.17839
ENSMUSG00000061603	Akap6	ENSMUSG00000061603.8	2782	2724	2585	2445	2433	2572	2590.07	-0.11847	0.0506733	-2.33792	0.0193914	0.17839
ENSMUSG00000066687	Zbtb16	ENSMUSG00000066687.5	224	254	227	148	185	219	209.533	-0.350673	0.150055	-2.33697	0.0194407	NA
ENSMUSG00000026452	Syt2	ENSMUSG00000026452.15	2516	2357	2143	2140	2111	2128	2232.47	-0.137594	0.0589326	-2.33477	0.0195552	0.179348
ENSMUSG00000022000	Zc3h13	ENSMUSG00000022000.11	913	958	904	827	815	835	875.238	-0.164309	0.0703761	-2.33472	0.0195579	0.179348
ENSMUSG00000025658	Ksr2	ENSMUSG00000025658.16	1831	1756	1965	1966	2077	2042	1939.68	0.133402	0.0571481	2.33432	0.0195789	0.179348
ENSMUSG00000037395	Rcor3	ENSMUSG00000037395.15	189	177	213	231	248	240	216.252	0.314163	0.134723	2.33192	0.0197051	NA
ENSMUSG00000017631	Abr	ENSMUSG00000017631.18	4144	4215	4012	3683	3916	3902	3978.85	-0.104563	0.0448512	-2.33132	0.0197363	0.180534
ENSMUSG00000109327	Gm44995	ENSMUSG00000109327.1	40	35	44	24	23	22	31.3864	-0.797057	0.341926	-2.33108	0.0197491	NA
ENSMUSG00000071074	Yipf3	ENSMUSG00000071074.9	544	563	530	468	454	494	508.815	-0.208572	0.08955	-2.32912	0.0198529	0.181343
ENSMUSG00000057738	Sptan1	ENSMUSG00000057738.13	10836	11129	10103	10223	9359	10183	10305.5	-0.107837	0.0463438	-2.3269	0.0199708	0.181982
ENSMUSG00000105139	Gm19391	ENSMUSG00000105139.1	9	2	7	20	16	14	11.2871	1.44169	0.619605	2.32679	0.0199765	NA
ENSMUSG00000063146	Clip2	ENSMUSG00000063146.11	1572	1646	1547	1484	1357	1483	1514.81	-0.141241	0.0607035	-2.32674	0.0199791	0.181982
ENSMUSG00000017778	Cox7c	ENSMUSG00000017778.14	1761	1737	2129	2170	2115	2016	1987.9	0.162646	0.0699265	2.32595	0.020021	0.182107
ENSMUSG00000013846	St3gal1	ENSMUSG00000013846.10	284	368	348	244	290	282	302.635	-0.292014	0.125638	-2.32425	0.0201123	NA
ENSMUSG00000059486	Kbtbd2	ENSMUSG00000059486.11	704	655	626	592	571	572	620.071	-0.19392	0.0834448	-2.32394	0.0201289	0.182488
ENSMUSG00000015806	Qdpr	ENSMUSG00000015806.12	2521	2317	2444	2322	2218	2138	2326.74	-0.125171	0.0538642	-2.32383	0.0201345	0.182488
ENSMUSG00000035049	Rrp12	ENSMUSG00000035049.3	376	386	378	292	295	361	348.112	-0.26212	0.11282	-2.32334	0.0201607	0.182488
ENSMUSG00000031523	Dlc1	ENSMUSG00000031523.16	815	839	774	721	678	747	762.211	-0.179253	0.0771623	-2.32306	0.020176	0.182488
ENSMUSG00000104661	Gm42768	ENSMUSG00000104661.1	10	4	4	1	0	1	3.38423	-3.17688	1.36763	-2.3229	0.0201843	NA
ENSMUSG00000003660	Snrnp200	ENSMUSG00000003660.10	1446	1500	1383	1361	1126	1363	1363.28	-0.170975	0.0736737	-2.3207	0.020303	0.18338
ENSMUSG00000043015	Nemp2	ENSMUSG00000043015.15	50	43	39	75	54	74	55.8847	0.61464	0.265229	2.3174	0.020482	NA
ENSMUSG00000024130	Abca3	ENSMUSG00000024130.15	1048	1054	943	945	779	946	952.42	-0.191274	0.0826227	-2.31503	0.0206115	0.185808
ENSMUSG00000020122	Egfr	ENSMUSG00000020122.16	184	208	192	149	139	170	173.5	-0.349252	0.150879	-2.31478	0.0206248	NA
ENSMUSG00000025582	Nptx1	ENSMUSG00000025582.4	3387	3984	3609	3421	3274	3352	3504.6	-0.128926	0.055701	-2.31461	0.0206341	0.185808
ENSMUSG00000037419	Endod1	ENSMUSG00000037419.9	1415	1374	1338	1272	1232	1244	1312.49	-0.139173	0.0601394	-2.31417	0.0206582	0.185808
ENSMUSG00000027288	Zfp106	ENSMUSG00000027288.16	2870	2691	2609	2491	2513	2526	2616.62	-0.116925	0.0506324	-2.3093	0.0209268	0.187963
ENSMUSG00000050556	Kcnb1	ENSMUSG00000050556.9	2272	2393	2402	1921	2186	2287	2243.43	-0.142467	0.0617136	-2.30852	0.0209701	0.18809
ENSMUSG00000004933	Matk	ENSMUSG00000004933.17	692	692	656	815	727	775	726.309	0.181583	0.0786855	2.30771	0.0210155	0.188151
ENSMUSG00000001424	Snd1	ENSMUSG00000001424.14	743	752	694	660	587	670	684.252	-0.191192	0.0828622	-2.30735	0.0210352	0.188151
ENSMUSG00000020900	Myh10	ENSMUSG00000020900.15	4061	4236	3801	3899	3484	3736	3869.84	-0.122593	0.0532009	-2.30434	0.0212037	0.189397
ENSMUSG00000037971	1110032A03Rik	ENSMUSG00000037971.10	318	250	289	344	338	348	314.368	0.269831	0.1171	2.30429	0.0212066	NA
ENSMUSG00000091003	Gm7244	ENSMUSG00000091003.2	1	10	3	1	0	0	2.57731	-3.74841	1.62686	-2.30408	0.021218	NA
ENSMUSG00000001134	Uxt	ENSMUSG00000001134.9	37	29	18	45	42	54	37.5207	0.761406	0.330896	2.30105	0.0213891	NA
ENSMUSG00000026826	Nr4a2	ENSMUSG00000026826.13	529	499	538	435	465	452	486.303	-0.209695	0.0911635	-2.3002	0.0214366	0.191212
ENSMUSG00000054728	Phactr1	ENSMUSG00000054728.16	2869	3127	2980	2687	2828	2777	2878.05	-0.114131	0.0497025	-2.29627	0.0216602	0.192895
ENSMUSG00000042155	Klhl23	ENSMUSG00000042155.3	571	594	624	649	720	672	638.324	0.19104	0.0832114	2.29584	0.0216851	0.192895
ENSMUSG00000056427	Slit3	ENSMUSG00000056427.10	314	336	269	252	253	253	279.365	-0.281129	0.122489	-2.29514	0.021725	NA
ENSMUSG00000078490	Cfap74	ENSMUSG00000078490.9	129	131	139	171	166	174	151.624	0.355725	0.155176	2.2924	0.0218824	NA
ENSMUSG00000034708	Grn	ENSMUSG00000034708.11	415	452	445	371	376	376	405.886	-0.225329	0.0983013	-2.29223	0.0218924	0.194472
ENSMUSG00000032501	Trib1	ENSMUSG00000032501.9	226	224	254	182	185	199	211.68	-0.309771	0.135155	-2.29196	0.0219077	NA
ENSMUSG00000024914	Drap1	ENSMUSG00000024914.16	1047	1133	1227	1285	1311	1213	1202.94	0.160186	0.0699308	2.29063	0.0219848	0.195024
ENSMUSG00000070427	Il18bp	ENSMUSG00000070427.4	69	91	82	66	54	48	68.3449	-0.550002	0.24016	-2.29014	0.0220129	NA
ENSMUSG00000059742	Kcnh7	ENSMUSG00000059742.10	1095	1020	1161	932	976	1014	1032.91	-0.163258	0.0713054	-2.28955	0.0220472	0.195037
ENSMUSG00000021087	Rtn1	ENSMUSG00000021087.18	8508	8800	8509	8000	8148	8215	8363.34	-0.0834875	0.0364699	-2.28921	0.0220669	0.195037
ENSMUSG00000027993	Trim2	ENSMUSG00000027993.16	3594	3557	3477	3255	3310	3349	3423.64	-0.0998324	0.0436131	-2.28904	0.0220768	0.195037
ENSMUSG00000049538	Adamts16	ENSMUSG00000049538.14	51	34	42	85	69	48	54.9885	0.651946	0.284879	2.2885	0.0221085	NA
ENSMUSG00000031967	Afg3l1	ENSMUSG00000031967.15	366	343	370	440	424	403	390.926	0.231028	0.100977	2.28792	0.0221421	0.195347
ENSMUSG00000024843	Chka	ENSMUSG00000024843.15	851	871	831	786	717	768	804.059	-0.169864	0.0742854	-2.28664	0.0222167	0.195737
ENSMUSG00000086695	Gm15247	ENSMUSG00000086695.1	4	4	10	0	2	0	3.3099	-3.19348	1.39762	-2.28494	0.0223166	NA
ENSMUSG00000047181	Samd14	ENSMUSG00000047181.12	594	560	537	675	647	613	604.26	0.194174	0.0850133	2.28404	0.0223691	0.196636
ENSMUSG00000032368	Zic1	ENSMUSG00000032368.14	2159	2025	2089	2660	2217	2133	2213.86	0.158954	0.0695989	2.28386	0.0223797	0.196636
ENSMUSG00000109394	A230057D06Rik	ENSMUSG00000109394.2	235	193	227	268	226	330	246.571	0.335093	0.146826	2.28225	0.0224748	NA
ENSMUSG00000064115	Cadm2	ENSMUSG00000064115.13	2341	2318	2421	2110	2153	2260	2267.18	-0.117234	0.0513805	-2.28168	0.0225085	0.1975
ENSMUSG00000032397	Tipin	ENSMUSG00000032397.7	78	67	97	112	112	108	95.5592	0.463438	0.203171	2.28102	0.0225473	NA
ENSMUSG00000022961	Son	ENSMUSG00000022961.18	3922	3744	3754	3499	3231	3754	3650.61	-0.123027	0.0539372	-2.28092	0.0225531	0.197622
ENSMUSG00000064337	mt-Rnr1	ENSMUSG00000064337.1	28354	28820	31385	28007	28366	26233	28527.7	-0.100466	0.0440584	-2.28029	0.0225902	0.19768
ENSMUSG00000032456	Nmnat3	ENSMUSG00000032456.13	12	9	16	33	26	17	19.0343	1.05839	0.464419	2.27896	0.0226694	NA
ENSMUSG00000042444	Mindy2	ENSMUSG00000042444.10	1287	1213	1230	1386	1349	1368	1305.47	0.137512	0.0603425	2.27885	0.0226757	0.198159
ENSMUSG00000031290	Lrch2	ENSMUSG00000031290.14	221	264	300	305	336	318	290.564	0.286699	0.125847	2.27815	0.0227175	NA
ENSMUSG00000023961	Enpp4	ENSMUSG00000023961.16	419	370	424	360	315	349	372.712	-0.244661	0.107438	-2.27724	0.0227719	0.198731
ENSMUSG00000024830	Rps6kb2	ENSMUSG00000024830.16	146	131	165	199	176	189	167.565	0.349778	0.153645	2.27653	0.0228145	NA
ENSMUSG00000007682	Dio2	ENSMUSG00000007682.6	724	685	721	566	638	658	665.174	-0.189891	0.0835186	-2.27364	0.0229877	0.199511
ENSMUSG00000020121	Srgap1	ENSMUSG00000020121.15	432	371	383	324	281	376	361.223	-0.270931	0.119184	-2.27321	0.0230136	0.199511
ENSMUSG00000035851	Ythdc1	ENSMUSG00000035851.14	770	796	812	687	692	731	748.104	-0.171937	0.0756446	-2.27296	0.0230284	0.199511
ENSMUSG00000041997	Tlk1	ENSMUSG00000041997.16	735	789	808	844	875	901	825.446	0.168526	0.0741445	2.27294	0.0230297	0.199511
ENSMUSG00000020396	Nefh	ENSMUSG00000020396.8	1777	1695	1429	1502	1413	1458	1545.59	-0.164687	0.0724605	-2.27279	0.023039	0.199511
ENSMUSG00000026192	Atic	ENSMUSG00000026192.13	304	305	346	262	276	256	291.674	-0.265665	0.11691	-2.2724	0.0230625	NA
ENSMUSG00000031565	Fgfr1	ENSMUSG00000031565.18	1008	1122	977	930	941	904	980.313	-0.164629	0.0724497	-2.27232	0.0230674	0.199511
ENSMUSG00000031231	Cox7b	ENSMUSG00000031231.4	1090	1170	1229	1322	1359	1211	1230.21	0.156756	0.06899	2.27215	0.0230775	0.199511
ENSMUSG00000049184	Purg	ENSMUSG00000049184.6	244	210	242	188	163	205	208.751	-0.322285	0.14187	-2.27169	0.0231054	NA
ENSMUSG00000097976	Gm26918	ENSMUSG00000097976.1	121	104	112	73	63	103	95.9722	-0.486026	0.214094	-2.27016	0.023198	NA
ENSMUSG00000097467	Gm26737	ENSMUSG00000097467.2	52	57	48	69	83	77	64.4367	0.542463	0.239003	2.26969	0.0232266	NA
ENSMUSG00000037541	Shank2	ENSMUSG00000037541.21	1712	1900	1698	1600	1557	1667	1689.13	-0.138533	0.0610444	-2.26938	0.0232449	0.20069
ENSMUSG00000071424	Grid2	ENSMUSG00000071424.10	687	616	680	599	561	576	619.823	-0.190921	0.0841856	-2.26786	0.0233377	0.201131
ENSMUSG00000028691	Prdx1	ENSMUSG00000028691.12	884	880	960	970	1101	987	963.805	0.168133	0.0741486	2.26752	0.0233584	0.201131
ENSMUSG00000022323	Rida	ENSMUSG00000022323.11	330	321	336	402	392	370	358.532	0.235837	0.104076	2.26601	0.023451	0.20166
ENSMUSG00000024810	Il33	ENSMUSG00000024810.16	453	417	466	387	384	374	413.601	-0.223433	0.09863	-2.26536	0.0234903	0.201729
ENSMUSG00000020448	Rnf185	ENSMUSG00000020448.16	348	340	377	334	288	270	326.058	-0.261502	0.115488	-2.26432	0.0235546	NA
ENSMUSG00000039716	Dock3	ENSMUSG00000039716.12	2740	2768	2584	2453	2452	2572	2594.7	-0.113591	0.0502365	-2.26112	0.0237517	0.203703
ENSMUSG00000022099	Dmtn	ENSMUSG00000022099.17	2563	2894	2691	2440	2369	2634	2598.46	-0.130456	0.0577118	-2.26047	0.0237919	0.203777
ENSMUSG00000043243	Fam129c	ENSMUSG00000043243.15	23	23	15	3	8	14	14.5189	-1.22872	0.543767	-2.25965	0.0238429	NA
ENSMUSG00000026553	Copa	ENSMUSG00000026553.17	2429	2515	2436	2253	2229	2346	2368.05	-0.112224	0.0496669	-2.25953	0.0238504	0.204008
ENSMUSG00000037990	Sh3rf3	ENSMUSG00000037990.18	227	283	249	204	194	217	229.076	-0.304028	0.13458	-2.25909	0.0238775	NA
ENSMUSG00000040560	Wdr7	ENSMUSG00000040560.9	2002	2135	1922	1860	1779	1902	1933.45	-0.129321	0.0572748	-2.2579	0.0239518	0.204604
ENSMUSG00000062797	Hikeshi	ENSMUSG00000062797.13	255	287	302	337	381	303	310.709	0.274708	0.121674	2.25774	0.023962	NA
ENSMUSG00000003762	Coq8b	ENSMUSG00000003762.13	178	168	139	121	110	139	142.553	-0.385471	0.170764	-2.25733	0.0239875	NA
ENSMUSG00000094910	D430019H16Rik	ENSMUSG00000094910.1	1015	1052	997	1082	1178	1138	1077.29	0.150029	0.0664658	2.25724	0.0239929	0.204685
ENSMUSG00000029093	Sorcs2	ENSMUSG00000029093.14	473	511	433	415	361	430	437.221	-0.235096	0.104176	-2.25672	0.0240256	0.204693
ENSMUSG00000006395	Hyi	ENSMUSG00000006395.16	84	63	71	92	107	102	86.8261	0.47377	0.209946	2.25663	0.0240314	NA
ENSMUSG00000001260	Gabrg1	ENSMUSG00000001260.10	341	315	320	396	379	374	354.113	0.236327	0.104762	2.25584	0.0240805	0.20489
ENSMUSG00000023830	Igf2r	ENSMUSG00000023830.13	558	517	471	461	416	453	479.304	-0.218784	0.0971452	-2.25213	0.0243139	0.206604
ENSMUSG00000067787	Blcap	ENSMUSG00000067787.10	1027	962	988	926	874	873	941.687	-0.156267	0.0694101	-2.25136	0.0243626	0.206633
ENSMUSG00000027162	Lin7c	ENSMUSG00000027162.7	972	900	991	1024	1151	1029	1011.33	0.164146	0.0729197	2.25106	0.024382	0.206633
ENSMUSG00000038517	Tbkbp1	ENSMUSG00000038517.15	604	644	659	730	694	738	678.369	0.179499	0.0797573	2.25056	0.0244132	0.206633
ENSMUSG00000034216	Vps18	ENSMUSG00000034216.12	556	584	528	502	468	482	519.963	-0.20152	0.0895744	-2.24975	0.024465	0.206798
ENSMUSG00000034687	Fras1	ENSMUSG00000034687.8	343	365	290	277	229	307	301.879	-0.294797	0.131048	-2.24953	0.024479	NA
ENSMUSG00000059981	Taok2	ENSMUSG00000059981.12	1458	1421	1408	1343	1260	1306	1366.13	-0.134017	0.0595831	-2.24925	0.0244968	0.206798
ENSMUSG00000021840	Mapk1ip1l	ENSMUSG00000021840.17	416	369	378	318	297	361	356.529	-0.250939	0.111642	-2.24771	0.0245949	0.207241
ENSMUSG00000051747	Ttn	ENSMUSG00000051747.14	37	42	39	27	11	28	30.6776	-0.838559	0.373077	-2.24768	0.0245964	NA
ENSMUSG00000024870	Rab1b	ENSMUSG00000024870.5	1143	1131	1047	1285	1267	1147	1169.88	0.154414	0.0687075	2.24742	0.0246135	0.207241
ENSMUSG00000022237	Ankrd33b	ENSMUSG00000022237.17	641	807	729	544	681	641	673.554	-0.220969	0.0983497	-2.24677	0.0246549	0.20732
ENSMUSG00000042772	Smg7	ENSMUSG00000042772.15	922	948	917	798	829	867	880.009	-0.159486	0.071004	-2.24616	0.024694	0.207379
ENSMUSG00000025551	Fgf14	ENSMUSG00000025551.13	513	492	483	538	604	564	532.212	0.200072	0.0891063	2.24532	0.0247474	0.207557
ENSMUSG00000024234	Mtpap	ENSMUSG00000024234.6	216	202	207	244	258	259	231.031	0.28549	0.127183	2.24472	0.024786	NA
ENSMUSG00000044763	Trmt10c	ENSMUSG00000044763.8	109	100	96	148	147	112	118.459	0.4153	0.185027	2.24454	0.0247976	NA
ENSMUSG00000068566	Myadm	ENSMUSG00000068566.12	488	523	457	433	399	433	455.53	-0.217273	0.0968376	-2.24369	0.0248525	0.207788
ENSMUSG00000033436	Armcx2	ENSMUSG00000033436.13	912	814	857	726	809	750	811.256	-0.173754	0.0774456	-2.24356	0.0248609	0.207788
ENSMUSG00000038178	Slc43a2	ENSMUSG00000038178.16	971	955	920	867	838	850	900.187	-0.155778	0.0694569	-2.24279	0.0249101	0.207788
ENSMUSG00000051111	Sv2c	ENSMUSG00000051111.16	1388	1281	1136	1171	1097	1126	1199.98	-0.165154	0.0736391	-2.24275	0.0249128	0.207788
ENSMUSG00000030654	Arl6ip1	ENSMUSG00000030654.9	3132	3080	3135	3210	3408	3414	3229.78	0.103118	0.045995	2.24194	0.0249651	0.207788
ENSMUSG00000028759	Hp1bp3	ENSMUSG00000028759.13	2502	2534	2483	2331	2358	2291	2416.56	-0.107388	0.0479005	-2.2419	0.024968	0.207788
ENSMUSG00000022987	Zfp641	ENSMUSG00000022987.12	97	88	87	136	116	113	106.045	0.422631	0.188561	2.24135	0.0250036	NA
ENSMUSG00000024921	Smarca2	ENSMUSG00000024921.17	2855	2961	2680	2655	2545	2648	2723.88	-0.115095	0.0513534	-2.24123	0.0250109	0.207877
ENSMUSG00000075033	Nxpe3	ENSMUSG00000075033.4	341	352	366	300	319	272	324.918	-0.250612	0.111824	-2.24113	0.0250175	NA
ENSMUSG00000102234	Gm37885	ENSMUSG00000102234.1	301	317	267	233	234	263	269.128	-0.277421	0.123836	-2.24024	0.0250754	NA
ENSMUSG00000026277	Stk25	ENSMUSG00000026277.14	1851	1766	1896	1972	2036	1981	1917.13	0.120301	0.0537049	2.24003	0.0250887	0.208256
ENSMUSG00000049252	Lrp1b	ENSMUSG00000049252.17	743	620	680	566	570	637	635.921	-0.20125	0.0898981	-2.23865	0.0251787	0.208734
ENSMUSG00000041020	Map7d2	ENSMUSG00000041020.14	2429	2443	2286	2180	2117	2292	2291.32	-0.119165	0.0532682	-2.23708	0.0252808	0.209312
ENSMUSG00000026037	Orc2	ENSMUSG00000026037.14	267	246	269	318	316	303	286.502	0.258605	0.115617	2.23673	0.025304	NA
ENSMUSG00000040666	Sh3bgr	ENSMUSG00000040666.18	76	46	46	90	77	79	68.9114	0.557999	0.249519	2.2363	0.0253321	NA
ENSMUSG00000012848	Rps5	ENSMUSG00000012848.15	969	924	949	1114	1124	956	1006.06	0.167493	0.0749125	2.23585	0.0253616	0.209708
ENSMUSG00000021816	Ppp3cb	ENSMUSG00000021816.11	2844	2856	3090	3111	3387	3054	3057.14	0.120308	0.0538202	2.23536	0.0253936	0.209708
ENSMUSG00000110471	Gm45823	ENSMUSG00000110471.1	3	3	7	0	0	1	2.31547	-3.59406	1.60825	-2.23476	0.025433	NA
ENSMUSG00000050359	Sprr1a	ENSMUSG00000050359.7	0	0	0	8	1	1	1.65679	4.15056	1.85738	2.23464	0.0254413	NA
ENSMUSG00000025092	Hspa12a	ENSMUSG00000025092.6	2792	2656	2555	2390	2322	2617	2555.52	-0.126259	0.0565386	-2.23314	0.0255397	0.210645
ENSMUSG00000021764	Ndufs4	ENSMUSG00000021764.8	505	503	547	640	583	565	556.874	0.198952	0.0891109	2.23263	0.0255731	0.210652
ENSMUSG00000084883	Ccdc85c	ENSMUSG00000084883.2	752	777	797	897	848	859	821.82	0.162117	0.0726343	2.23195	0.025618	0.210753
ENSMUSG00000095648	Gm2004	ENSMUSG00000095648.7	3	10	13	5	70	76	29.4656	2.5063	1.12354	2.23072	0.0256995	NA
ENSMUSG00000028753	Vwa5b1	ENSMUSG00000028753.12	83	79	66	110	94	110	90.3593	0.457112	0.204931	2.23056	0.02571	NA
ENSMUSG00000029513	Prkab1	ENSMUSG00000029513.14	115	115	110	139	147	154	129.812	0.374075	0.167778	2.22958	0.0257752	NA
ENSMUSG00000091177	Gm15494	ENSMUSG00000091177.2	23	14	17	5	7	11	12.7225	-1.26072	0.565476	-2.22948	0.0257822	NA
ENSMUSG00000047935	Sox1ot	ENSMUSG00000047935.17	159	156	175	218	215	183	184.503	0.326085	0.146261	2.22947	0.0257824	NA
ENSMUSG00000028455	Stoml2	ENSMUSG00000028455.15	381	397	411	495	488	412	430.693	0.228832	0.102664	2.22893	0.0258184	0.212054
ENSMUSG00000063253	Scoc	ENSMUSG00000063253.11	1106	1152	1112	1278	1254	1189	1181.71	0.141707	0.0635862	2.22858	0.0258418	0.212054
ENSMUSG00000033943	Mga	ENSMUSG00000033943.15	960	947	972	849	866	874	911.335	-0.152429	0.0684191	-2.22787	0.0258894	0.212174
ENSMUSG00000022450	Ndufa6	ENSMUSG00000022450.6	640	618	639	718	783	660	676.503	0.187887	0.0843716	2.2269	0.025954	0.212435
ENSMUSG00000085891	Gm14634	ENSMUSG00000085891.7	19	14	24	9	8	7	13.67	-1.18918	0.534152	-2.2263	0.0259941	NA
ENSMUSG00000025203	Scd2	ENSMUSG00000025203.5	16378	16585	15724	16083	15004	14566	15723.2	-0.0931749	0.0418788	-2.22487	0.0260898	0.213219
ENSMUSG00000031626	Sorbs2	ENSMUSG00000031626.17	1339	1422	1377	1162	1281	1301	1313.82	-0.143061	0.0643119	-2.22448	0.0261159	0.213219
ENSMUSG00000063142	Kcnma1	ENSMUSG00000063142.15	2456	2466	2423	2187	2245	2359	2355.86	-0.112172	0.0504466	-2.22358	0.0261768	0.213447
ENSMUSG00000052981	Ube2ql1	ENSMUSG00000052981.6	1540	1581	1498	1338	1435	1438	1471.79	-0.132087	0.0594315	-2.22251	0.0262488	0.213712
ENSMUSG00000014498	Ankrd52	ENSMUSG00000014498.9	1146	1183	1067	999	999	1059	1075.45	-0.151355	0.068118	-2.22196	0.0262863	0.213712
ENSMUSG00000041329	Atp1b2	ENSMUSG00000041329.13	5712	5407	5077	5372	4818	4697	5180.58	-0.122333	0.055073	-2.22129	0.0263316	0.213712
ENSMUSG00000040380	Cbln3	ENSMUSG00000040380.14	2178	1969	2297	3092	2661	2270	2411.24	0.31613	0.142328	2.22114	0.0263418	0.213712
ENSMUSG00000038291	Snx25	ENSMUSG00000038291.16	455	471	479	543	516	555	502.987	0.198669	0.0894784	2.2203	0.0263986	0.213905
ENSMUSG00000028218	Fam92a	ENSMUSG00000028218.19	291	252	283	354	305	330	302.786	0.260131	0.117166	2.22019	0.0264061	NA
ENSMUSG00000032637	Atxn2l	ENSMUSG00000032637.15	1369	1281	1401	1272	1117	1259	1283.26	-0.151301	0.0681717	-2.21941	0.0264591	0.213983
ENSMUSG00000085560	C230038L03Rik	ENSMUSG00000085560.2	177	169	184	136	138	145	158.047	-0.338552	0.152548	-2.21932	0.0264648	NA
ENSMUSG00000042751	Nmnat2	ENSMUSG00000042751.14	1722	1796	1700	1607	1531	1643	1666.61	-0.126334	0.0569339	-2.21896	0.0264897	0.213983
ENSMUSG00000061518	Cox5b	ENSMUSG00000061518.11	1413	1557	1490	1650	1854	1489	1575.53	0.162423	0.0732064	2.21869	0.0265077	0.213983
ENSMUSG00000037740	Mrps26	ENSMUSG00000037740.8	364	358	351	473	394	398	389.667	0.235099	0.106028	2.21733	0.0266006	0.214465
ENSMUSG00000061207	Stk19	ENSMUSG00000061207.11	258	230	271	209	209	203	230.156	-0.288628	0.130209	-2.21665	0.0266472	NA
ENSMUSG00000071757	Zhx2	ENSMUSG00000071757.10	176	184	178	120	140	161	159.871	-0.350744	0.15829	-2.21583	0.026703	NA
ENSMUSG00000103552	Gm38217	ENSMUSG00000103552.1	3	4	2	0	0	0	1.48043	-4.01231	1.81163	-2.21475	0.0267769	NA
ENSMUSG00000024560	Cxxc1	ENSMUSG00000024560.6	457	487	418	411	351	402	421.017	-0.230374	0.104022	-2.21466	0.0267831	0.215667
ENSMUSG00000097863	1010001B22Rik	ENSMUSG00000097863.1	4	1	4	0	0	0	1.5247	-4.04617	1.82826	-2.21313	0.0268889	NA
ENSMUSG00000020018	Snrpf	ENSMUSG00000020018.6	168	191	180	196	241	231	201.156	0.313488	0.141656	2.21303	0.0268958	NA
ENSMUSG00000001552	Jup	ENSMUSG00000001552.14	681	669	660	573	573	625	630.138	-0.181214	0.0818853	-2.21302	0.0268964	0.21631
ENSMUSG00000023025	Larp4	ENSMUSG00000023025.16	753	734	751	628	674	682	703.651	-0.171718	0.0776316	-2.21196	0.0269696	0.216629
ENSMUSG00000005312	Ubqln1	ENSMUSG00000005312.15	1956	2142	1864	1790	1841	1814	1901.12	-0.131298	0.0593833	-2.21103	0.0270336	0.216873
ENSMUSG00000024997	Prdx3	ENSMUSG00000024997.7	508	514	565	665	585	576	568.965	0.200722	0.0908146	2.21024	0.0270882	0.217042
ENSMUSG00000041771	Slc24a4	ENSMUSG00000041771.13	238	246	267	206	205	207	228.05	-0.284525	0.128736	-2.21014	0.0270952	NA
ENSMUSG00000086484	Nron	ENSMUSG00000086484.1	2	4	3	0	0	0	1.47316	-4.00685	1.81317	-2.20986	0.0271146	NA
ENSMUSG00000043388	Tmem130	ENSMUSG00000043388.8	2738	2542	2233	2066	1790	2289	2276.41	-0.289755	0.131145	-2.20941	0.0271458	0.217234
ENSMUSG00000067736	Gm10222	ENSMUSG00000067736.2	88	88	99	118	127	120	106.671	0.408865	0.185082	2.2091	0.0271676	NA
ENSMUSG00000018583	G3bp1	ENSMUSG00000018583.5	843	845	818	748	723	769	791.056	-0.162079	0.0733815	-2.20872	0.0271943	0.217353
ENSMUSG00000033781	Asb13	ENSMUSG00000033781.7	634	652	588	694	731	695	665.604	0.178373	0.0808242	2.20693	0.0273193	0.218082
ENSMUSG00000027940	Tpm3	ENSMUSG00000027940.18	1452	1351	1408	1276	1263	1299	1341.68	-0.133011	0.0602973	-2.20592	0.0273896	0.218152
ENSMUSG00000007670	Khsrp	ENSMUSG00000007670.9	747	879	729	714	684	673	737.574	-0.187889	0.0851783	-2.20583	0.0273957	0.218152
ENSMUSG00000027581	Stmn3	ENSMUSG00000027581.12	4152	4263	4472	4852	4477	4526	4456.82	0.10385	0.0470938	2.20518	0.0274417	0.218249
ENSMUSG00000028053	Ash1l	ENSMUSG00000028053.13	1905	1868	1952	1716	1726	1823	1831.7	-0.120051	0.0544765	-2.20372	0.0275439	0.218793
ENSMUSG00000007880	Arid1a	ENSMUSG00000007880.16	1491	1533	1386	1388	1272	1347	1402.74	-0.139546	0.0633494	-2.20279	0.0276093	0.218881
ENSMUSG00000079508	Apoo	ENSMUSG00000079508.8	241	250	272	296	323	296	279.636	0.261551	0.118738	2.20276	0.0276117	NA
ENSMUSG00000000325	Arvcf	ENSMUSG00000000325.16	359	308	307	376	377	393	353.437	0.2385	0.108297	2.20228	0.0276457	0.218881
ENSMUSG00000030237	Slco1a4	ENSMUSG00000030237.14	474	489	469	528	566	545	511.876	0.194763	0.0884747	2.20134	0.0277118	0.218881
ENSMUSG00000002129	Sf3a1	ENSMUSG00000002129.11	694	717	688	651	588	619	659.691	-0.177264	0.0805291	-2.20124	0.0277192	0.218881
ENSMUSG00000032101	Ddx25	ENSMUSG00000032101.6	546	504	487	585	604	567	548.995	0.193723	0.0880096	2.20116	0.0277245	0.218881
ENSMUSG00000035365	Parpbp	ENSMUSG00000035365.15	108	110	94	136	124	149	120.381	0.391599	0.178047	2.19941	0.0278488	NA
ENSMUSG00000020607	Fam84a	ENSMUSG00000020607.7	646	664	683	547	602	604	624.408	-0.182253	0.0828754	-2.19912	0.0278691	0.219676
ENSMUSG00000086017	Gm11872	ENSMUSG00000086017.1	1	0	0	3	2	7	2.28651	3.57445	1.62555	2.19892	0.0278838	NA
ENSMUSG00000008658	Rbfox1	ENSMUSG00000008658.16	2437	2706	2515	2341	2411	2314	2453.95	-0.116768	0.0531055	-2.19878	0.0278932	0.219676
ENSMUSG00000029131	Dnajb6	ENSMUSG00000029131.14	1266	1200	1316	1366	1441	1352	1323.42	0.138077	0.0628751	2.19605	0.0280887	0.220647
ENSMUSG00000030088	Aldh1l1	ENSMUSG00000030088.15	566	598	557	559	502	419	533.462	-0.22287	0.101495	-2.19587	0.0281011	0.220647
ENSMUSG00000019832	Rab32	ENSMUSG00000019832.5	13	20	19	7	8	7	12.1727	-1.23463	0.5623	-2.19568	0.0281145	NA
ENSMUSG00000020823	Sec14l1	ENSMUSG00000020823.16	1924	2085	2060	1845	1892	1852	1943.03	-0.118984	0.0541969	-2.1954	0.028135	0.220647
ENSMUSG00000013921	Clip3	ENSMUSG00000013921.15	4525	4872	4478	4427	4072	4387	4460	-0.107314	0.0488872	-2.19515	0.0281532	0.220647
ENSMUSG00000107335	Gm43372	ENSMUSG00000107335.1	58	79	58	97	100	80	78.6162	0.496625	0.226312	2.19443	0.0282048	NA
ENSMUSG00000036634	Mag	ENSMUSG00000036634.15	2746	2654	2451	2522	2036	2094	2417.18	-0.239891	0.10934	-2.19398	0.0282367	0.221034
ENSMUSG00000023010	Tmbim6	ENSMUSG00000023010.15	3137	3221	2935	2993	2832	2776	2982.59	-0.112839	0.0514857	-2.19166	0.0284041	0.222075
ENSMUSG00000068130	Zfp442	ENSMUSG00000068130.11	12	29	15	31	39	33	26.3767	0.879865	0.401624	2.19077	0.0284684	NA
ENSMUSG00000106743	Gm42847	ENSMUSG00000106743.1	50	45	52	61	83	70	60.3247	0.549025	0.250682	2.19013	0.028515	NA
ENSMUSG00000030811	Fbxl19	ENSMUSG00000030811.14	680	677	630	752	760	726	704.05	0.170604	0.0779193	2.18949	0.0285612	0.222877
ENSMUSG00000030102	Itpr1	ENSMUSG00000030102.11	10799	10083	10196	10335	9454	9152	10003	-0.103203	0.0471401	-2.18928	0.0285767	0.222877
ENSMUSG00000079084	Ccdc82	ENSMUSG00000079084.10	402	379	404	423	506	450	427.334	0.221868	0.101364	2.18882	0.0286103	0.222877
ENSMUSG00000036760	Kcnk9	ENSMUSG00000036760.7	1483	1383	1412	1199	1305	1367	1358.18	-0.142205	0.0650061	-2.18756	0.0287016	0.223319
ENSMUSG00000036249	Rbm43	ENSMUSG00000036249.16	133	139	108	164	186	143	145.331	0.374302	0.171255	2.18564	0.0288417	NA
ENSMUSG00000024146	Cript	ENSMUSG00000024146.9	341	346	413	446	441	407	399.109	0.232793	0.10652	2.18544	0.0288563	0.224246
ENSMUSG00000043909	Trp53bp1	ENSMUSG00000043909.16	1560	1442	1409	1320	1242	1422	1399.05	-0.14625	0.0669343	-2.18498	0.0288901	0.224246
ENSMUSG00000024781	Lipa	ENSMUSG00000024781.15	256	285	269	214	254	196	245.564	-0.289746	0.132639	-2.18447	0.0289275	NA
ENSMUSG00000009090	Ap1b1	ENSMUSG00000009090.17	1555	1532	1517	1413	1379	1430	1471.06	-0.124469	0.0569819	-2.18436	0.0289357	0.22433
ENSMUSG00000042111	Ccdc115	ENSMUSG00000042111.9	125	132	130	156	173	162	146.345	0.346227	0.158535	2.18392	0.0289683	NA
ENSMUSG00000114951	Gm20784	ENSMUSG00000114951.1	3	7	7	13	14	16	10.0029	1.37097	0.627869	2.18353	0.0289968	NA
ENSMUSG00000031216	Stard8	ENSMUSG00000031216.13	263	305	221	222	210	210	238.412	-0.301484	0.138106	-2.18298	0.0290371	NA
ENSMUSG00000036550	Cnot1	ENSMUSG00000036550.16	1472	1496	1428	1318	1266	1415	1398.86	-0.136047	0.0623374	-2.18243	0.0290777	0.22516
ENSMUSG00000059796	Eif4a1	ENSMUSG00000059796.16	1545	1514	1665	1655	1750	1757	1647.58	0.128911	0.0590991	2.18127	0.0291632	0.225505
ENSMUSG00000024949	Sf1	ENSMUSG00000024949.17	1423	1473	1400	1342	1196	1360	1365.83	-0.141581	0.0649501	-2.17984	0.0292696	0.225505
ENSMUSG00000029121	Crmp1	ENSMUSG00000029121.16	1577	1697	1726	1535	1452	1578	1594.07	-0.131668	0.0604035	-2.17981	0.0292713	0.225505
ENSMUSG00000087115	Pcsk2os2	ENSMUSG00000087115.7	578	627	568	463	539	538	552.178	-0.200205	0.0918664	-2.17931	0.0293085	0.225505
ENSMUSG00000044068	Zrsr1	ENSMUSG00000044068.7	775	776	790	851	865	890	824.653	0.155896	0.0715432	2.17904	0.0293286	0.225505
ENSMUSG00000079641	Rpl39	ENSMUSG00000079641.3	736	684	844	880	881	812	806.076	0.183792	0.0843468	2.179	0.0293317	0.225505
ENSMUSG00000032531	Amotl2	ENSMUSG00000032531.15	338	332	341	312	242	293	309.651	-0.258753	0.118791	-2.17823	0.029389	NA
ENSMUSG00000029623	Pdap1	ENSMUSG00000029623.14	887	896	904	1003	1029	951	944.967	0.150088	0.068916	2.17785	0.0294175	0.225896
ENSMUSG00000000732	Icosl	ENSMUSG00000000732.9	56	67	78	53	40	43	56.13	-0.575443	0.264283	-2.17737	0.0294528	NA
ENSMUSG00000043259	Fam13c	ENSMUSG00000043259.15	754	754	775	684	653	698	719.788	-0.166289	0.076397	-2.17664	0.0295076	0.226318
ENSMUSG00000040260	Daam2	ENSMUSG00000040260.8	1200	1164	1134	1074	1016	1082	1111.64	-0.141459	0.0650155	-2.17577	0.0295721	0.226442
ENSMUSG00000017314	Mpp2	ENSMUSG00000017314.12	1431	1516	1489	1262	1375	1399	1411.92	-0.134951	0.0620413	-2.17517	0.0296172	0.226442
ENSMUSG00000039202	Abhd2	ENSMUSG00000039202.12	1049	1107	1068	1021	981	904	1021.69	-0.151872	0.0698257	-2.17502	0.0296289	0.226442
ENSMUSG00000025646	Atrip	ENSMUSG00000025646.9	147	163	171	221	188	194	180.48	0.320616	0.14744	2.17455	0.0296641	NA
ENSMUSG00000020069	Hnrnph3	ENSMUSG00000020069.16	703	645	671	537	628	604	631.244	-0.187162	0.0860798	-2.17429	0.0296836	0.226592
ENSMUSG00000061762	Tac1	ENSMUSG00000061762.12	278	346	313	375	364	371	340.985	0.242953	0.111781	2.17347	0.0297447	0.2266
ENSMUSG00000019894	Slc6a15	ENSMUSG00000019894.14	502	515	531	561	556	661	554.389	0.20146	0.0926962	2.17334	0.0297548	0.2266
ENSMUSG00000002341	Ncan	ENSMUSG00000002341.8	1671	1737	1408	1430	1421	1475	1523.6	-0.15523	0.071455	-2.17242	0.0298242	0.226861
ENSMUSG00000027273	Snap25	ENSMUSG00000027273.13	19193	20038	20280	20410	21905	20739	20427.6	0.0835201	0.0384562	2.17182	0.0298689	0.226934
ENSMUSG00000004099	Dnmt1	ENSMUSG00000004099.16	698	733	678	621	609	640	662.987	-0.173256	0.0798178	-2.17065	0.0299578	0.227342
ENSMUSG00000069094	Pde7a	ENSMUSG00000069094.12	271	286	301	358	327	331	312.244	0.243438	0.112211	2.16946	0.0300478	NA
ENSMUSG00000083458	Gm5510	ENSMUSG00000083458.1	0	2	0	8	5	4	3.05326	3.06395	1.4126	2.16901	0.0300816	NA
ENSMUSG00000085440	Sorbs2os	ENSMUSG00000085440.1	90	112	88	68	72	71	83.597	-0.460887	0.212538	-2.16849	0.0301212	NA
ENSMUSG00000034265	Zdhhc14	ENSMUSG00000034265.8	398	461	382	356	321	375	382.143	-0.238954	0.1102	-2.16837	0.0301308	0.228357
ENSMUSG00000049323	Smcr8	ENSMUSG00000049323.8	573	594	566	509	502	513	542.831	-0.185616	0.0856225	-2.16784	0.0301706	0.228357
ENSMUSG00000028059	Arhgef2	ENSMUSG00000028059.15	1259	1349	1339	1239	1148	1205	1256.61	-0.137322	0.0633555	-2.16749	0.0301977	0.228357
ENSMUSG00000041769	Ppp2r2d	ENSMUSG00000041769.13	490	543	595	617	619	627	581.793	0.194053	0.0895619	2.16669	0.0302585	0.228533
ENSMUSG00000020948	Klhl28	ENSMUSG00000020948.9	436	420	450	339	416	359	403.448	-0.22726	0.104909	-2.16625	0.0302917	0.228533
ENSMUSG00000113216	Gm40841	ENSMUSG00000113216.1	181	128	160	130	109	120	138.102	-0.382538	0.176734	-2.16449	0.0304266	NA
ENSMUSG00000088609	Gm24187	ENSMUSG00000088609.1	13	10	15	8	3	3	8.59454	-1.51471	0.699845	-2.16436	0.030437	NA
ENSMUSG00000032733	Snx33	ENSMUSG00000032733.6	165	162	165	136	106	142	145.879	-0.359263	0.166075	-2.16325	0.030522	NA
ENSMUSG00000044350	Lacc1	ENSMUSG00000044350.14	26	39	47	53	63	58	47.7529	0.626867	0.289785	2.16322	0.0305246	NA
ENSMUSG00000056895	Hist3h2ba	ENSMUSG00000056895.4	147	115	147	180	183	158	155.073	0.350861	0.162196	2.16319	0.0305269	NA
ENSMUSG00000021115	Vrk1	ENSMUSG00000021115.15	129	119	125	142	156	178	141.488	0.357298	0.165185	2.16302	0.0305396	NA
ENSMUSG00000026878	Rab14	ENSMUSG00000026878.17	2443	2501	2445	2220	2292	2347	2374.64	-0.106522	0.0492482	-2.16296	0.030544	0.230167
ENSMUSG00000063887	Nlgn1	ENSMUSG00000063887.13	609	537	600	620	705	662	622.3	0.188571	0.0872168	2.1621	0.0306107	0.230401
ENSMUSG00000092216	Gm19345	ENSMUSG00000092216.3	16	29	18	53	29	31	29.3589	0.836308	0.387188	2.15995	0.0307763	NA
ENSMUSG00000071076	Jund	ENSMUSG00000071076.6	1186	1321	1178	1346	1355	1359	1290.85	0.138988	0.0643583	2.1596	0.0308037	0.231584
ENSMUSG00000024601	Isoc1	ENSMUSG00000024601.8	283	245	253	276	332	328	286.149	0.264453	0.122512	2.15859	0.0308821	NA
ENSMUSG00000033007	Asic4	ENSMUSG00000033007.15	177	199	197	239	217	247	212.755	0.291742	0.135177	2.15821	0.0309112	NA
ENSMUSG00000022521	Crebbp	ENSMUSG00000022521.10	726	795	715	708	616	655	702.432	-0.179393	0.0831439	-2.15762	0.0309572	0.231829
ENSMUSG00000021756	Il6st	ENSMUSG00000021756.12	1274	1294	1324	1197	1136	1214	1239.96	-0.133944	0.0620826	-2.15751	0.0309663	0.231829
ENSMUSG00000028851	Nudc	ENSMUSG00000028851.6	1053	1084	1031	1239	1133	1133	1112.27	0.143543	0.0665346	2.15743	0.0309725	0.231829
ENSMUSG00000030802	Bckdk	ENSMUSG00000030802.14	265	257	264	315	319	300	286.806	0.24722	0.114593	2.15737	0.0309771	NA
ENSMUSG00000035150	Eif2s3x	ENSMUSG00000035150.15	734	690	750	818	826	790	767.897	0.162551	0.075348	2.15733	0.03098	0.231829
ENSMUSG00000031104	Rab33a	ENSMUSG00000031104.2	136	129	145	194	173	155	155.446	0.343167	0.159072	2.1573	0.030982	NA
ENSMUSG00000079477	Rab7	ENSMUSG00000079477.9	3327	3287	3248	3033	3185	2986	3177.78	-0.0995409	0.0461671	-2.1561	0.0310757	0.232129
ENSMUSG00000044636	Csrnp2	ENSMUSG00000044636.6	259	293	248	219	242	196	243.043	-0.286181	0.132739	-2.15597	0.0310857	NA
ENSMUSG00000026103	Gls	ENSMUSG00000026103.14	3845	3617	3656	3843	3961	4097	3836.49	0.0988663	0.0458586	2.15589	0.0310919	0.232129
ENSMUSG00000040339	Fam102b	ENSMUSG00000040339.10	650	581	606	688	723	666	652.521	0.178001	0.0826253	2.15432	0.0312153	0.232541
ENSMUSG00000039126	Prune2	ENSMUSG00000039126.10	1472	1531	1473	1359	1412	1328	1429.09	-0.127023	0.0589633	-2.15427	0.0312191	0.232541
ENSMUSG00000050963	Kcns2	ENSMUSG00000050963.7	277	264	240	305	316	308	284.964	0.251726	0.116901	2.15332	0.0312935	NA
ENSMUSG00000027804	Ppid	ENSMUSG00000027804.13	854	852	824	723	787	754	799.062	-0.159063	0.0738718	-2.15323	0.0313007	0.23288
ENSMUSG00000110162	Gm45356	ENSMUSG00000110162.1	2	8	2	0	0	1	2.2342	-3.55079	1.64963	-2.15248	0.0313597	NA
ENSMUSG00000020099	Unc5b	ENSMUSG00000020099.8	758	741	661	644	647	621	678.927	-0.176879	0.0821775	-2.1524	0.0313657	0.233095
ENSMUSG00000032324	Tspan3	ENSMUSG00000032324.11	2538	2703	2973	3047	2977	2915	2858.93	0.121684	0.0565494	2.15182	0.0314114	0.233167
ENSMUSG00000086765	Gm11827	ENSMUSG00000086765.7	0	0	0	1	5	3	1.43562	3.98543	1.85222	2.15171	0.0314206	NA
ENSMUSG00000104148	Pcdha2	ENSMUSG00000104148.5	47	38	35	27	27	18	32.1283	-0.74406	0.345815	-2.15161	0.0314278	NA
ENSMUSG00000106086	Gm43352	ENSMUSG00000106086.1	41	59	37	31	30	23	36.833	-0.709025	0.329619	-2.15104	0.0314727	NA
ENSMUSG00000074738	Fndc10	ENSMUSG00000074738.2	297	308	320	367	373	346	335.202	0.231417	0.107611	2.15051	0.0315152	NA
ENSMUSG00000037443	Cep85	ENSMUSG00000037443.13	147	153	170	126	124	118	139.638	-0.351334	0.163391	-2.15027	0.0315338	NA
ENSMUSG00000022231	Sema5a	ENSMUSG00000022231.10	768	731	623	576	618	656	661.996	-0.196067	0.0912	-2.14985	0.0315667	0.233985
ENSMUSG00000086889	Phf2os1	ENSMUSG00000086889.1	16	18	25	39	28	36	26.9652	0.813358	0.378394	2.1495	0.0315947	NA
ENSMUSG00000043866	Taf10	ENSMUSG00000043866.11	630	689	660	775	712	745	701.916	0.170377	0.0792702	2.14931	0.0316095	0.233985
ENSMUSG00000045031	Cetn4	ENSMUSG00000045031.18	57	66	71	80	107	84	77.5793	0.485099	0.225705	2.14926	0.0316139	NA
ENSMUSG00000029076	Sdf4	ENSMUSG00000029076.14	2378	2192	2260	2469	2429	2467	2365.74	0.109064	0.0507498	2.14905	0.0316304	0.233985
ENSMUSG00000000628	Hk2	ENSMUSG00000000628.10	57	66	48	94	68	84	69.4357	0.515443	0.239865	2.14889	0.0316433	NA
ENSMUSG00000040794	C1qtnf4	ENSMUSG00000040794.5	865	955	912	1051	1030	962	962.293	0.153201	0.0713325	2.1477	0.0317378	0.234511
ENSMUSG00000027998	Plrg1	ENSMUSG00000027998.11	285	319	312	238	252	275	280.079	-0.257105	0.119715	-2.14765	0.0317416	NA
ENSMUSG00000060591	Ifitm2	ENSMUSG00000060591.9	8	7	11	20	22	16	13.8064	1.1332	0.527663	2.14759	0.0317463	NA
ENSMUSG00000025260	Hsd17b10	ENSMUSG00000025260.10	195	177	171	248	229	196	202.687	0.307176	0.143098	2.1466	0.0318249	NA
ENSMUSG00000020091	Eif4ebp2	ENSMUSG00000020091.15	830	841	844	678	815	738	790.835	-0.171248	0.079788	-2.14629	0.0318497	0.234767
ENSMUSG00000014776	Nol3	ENSMUSG00000014776.7	286	264	268	336	313	320	297.936	0.243706	0.11355	2.14624	0.0318535	NA
ENSMUSG00000029804	Herc3	ENSMUSG00000029804.17	1982	1890	2018	1746	1821	1857	1885.62	-0.117513	0.054765	-2.14576	0.031892	0.234767
ENSMUSG00000031431	Tsc22d3	ENSMUSG00000031431.13	824	758	804	672	735	716	751.776	-0.165959	0.0773452	-2.1457	0.0318972	0.234767
ENSMUSG00000028843	Sh3bgrl3	ENSMUSG00000028843.8	338	363	355	397	427	404	380.61	0.217909	0.101568	2.14544	0.0319178	0.234767
ENSMUSG00000028367	Txn1	ENSMUSG00000028367.5	477	503	448	542	569	525	510.793	0.195223	0.0910513	2.1441	0.0320251	0.235063
ENSMUSG00000026409	Pfkfb2	ENSMUSG00000026409.14	237	237	217	289	278	264	253.821	0.263324	0.122827	2.14386	0.0320438	NA
ENSMUSG00000085818	Gm13267	ENSMUSG00000085818.7	2	1	4	7	7	13	5.56479	1.92042	0.896229	2.14278	0.0321311	NA
ENSMUSG00000049225	Pdp1	ENSMUSG00000049225.14	1506	1674	1649	1393	1501	1507	1538.33	-0.133482	0.0622949	-2.14274	0.032134	0.235063
ENSMUSG00000052397	Ezr	ENSMUSG00000052397.8	410	479	412	397	335	380	402.107	-0.230433	0.107562	-2.14233	0.032167	0.235063
ENSMUSG00000020372	Rack1	ENSMUSG00000020372.15	1029	1017	1114	1170	1189	1129	1107.93	0.142383	0.0664695	2.14208	0.0321869	0.235063
ENSMUSG00000054455	Vapb	ENSMUSG00000054455.4	2030	2115	1969	2187	2219	2196	2119.41	0.110647	0.0516687	2.14148	0.0322356	0.235063
ENSMUSG00000020277	Pfkl	ENSMUSG00000020277.10	1500	1711	1522	1468	1349	1477	1504.4	-0.141773	0.0662082	-2.14132	0.0322483	0.235063
ENSMUSG00000025579	Gaa	ENSMUSG00000025579.14	3523	3542	3064	2968	2585	3132	3135.69	-0.222039	0.103715	-2.14085	0.0322865	0.235063
ENSMUSG00000040649	Rimklb	ENSMUSG00000040649.15	407	398	405	456	497	443	434.269	0.207045	0.0967135	2.1408	0.03229	0.235063
ENSMUSG00000037857	Nufip2	ENSMUSG00000037857.16	586	585	583	486	516	539	549.178	-0.185084	0.0864617	-2.14065	0.0323025	0.235063
ENSMUSG00000008167	Fbxw9	ENSMUSG00000008167.14	98	90	103	121	140	119	111.85	0.392634	0.183457	2.1402	0.0323389	NA
ENSMUSG00000048814	Lonrf2	ENSMUSG00000048814.10	2047	2016	1939	1790	1817	1925	1922.46	-0.117008	0.0546749	-2.14006	0.0323499	0.235063
ENSMUSG00000090061	Nwd2	ENSMUSG00000090061.9	526	442	485	419	383	446	449.998	-0.21792	0.101834	-2.13995	0.0323585	0.235063
ENSMUSG00000045160	Bola3	ENSMUSG00000045160.14	198	217	214	271	260	233	232.378	0.277942	0.129884	2.13993	0.0323603	NA
ENSMUSG00000007029	Vars	ENSMUSG00000007029.16	407	431	408	370	322	377	385.877	-0.223063	0.104296	-2.13875	0.0324558	0.235505
ENSMUSG00000030744	Rps3	ENSMUSG00000030744.13	2405	2561	2766	2916	2857	2656	2693.41	0.123625	0.0578252	2.13791	0.0325242	0.235635
ENSMUSG00000035629	Rubcn	ENSMUSG00000035629.18	964	1056	949	848	873	940	938.229	-0.157703	0.0737777	-2.13755	0.0325533	0.235635
ENSMUSG00000084799	Ino80dos	ENSMUSG00000084799.7	307	277	310	329	351	372	324.299	0.239238	0.111939	2.13721	0.0325806	NA
ENSMUSG00000027933	Ints3	ENSMUSG00000027933.11	641	681	633	599	540	588	613.815	-0.180007	0.0842301	-2.13709	0.0325909	0.235635
ENSMUSG00000021514	Zfp369	ENSMUSG00000021514.18	315	314	320	274	284	241	291.051	-0.250128	0.117051	-2.13692	0.0326042	NA
ENSMUSG00000071072	Ptges3	ENSMUSG00000071072.12	704	671	749	647	555	663	664.623	-0.188004	0.0880019	-2.13637	0.0326496	0.235635
ENSMUSG00000066306	Numa1	ENSMUSG00000066306.13	1309	1297	1199	1130	1110	1210	1209.25	-0.141026	0.0660267	-2.1359	0.0326875	0.235635
ENSMUSG00000022829	Stxbp5l	ENSMUSG00000022829.14	757	754	748	632	620	740	708.644	-0.179806	0.0841949	-2.13559	0.0327127	0.235635
ENSMUSG00000034424	Gcsh	ENSMUSG00000034424.5	340	262	316	395	360	339	335.29	0.254816	0.119337	2.13525	0.0327403	NA
ENSMUSG00000058546	Rpl23a	ENSMUSG00000058546.8	1174	1166	1228	1267	1237	1452	1254	0.150024	0.0702776	2.13473	0.0327828	0.235635
ENSMUSG00000021262	Evl	ENSMUSG00000021262.15	785	883	785	866	915	966	866.727	0.16449	0.0770552	2.1347	0.0327854	0.235635
ENSMUSG00000011877	Git1	ENSMUSG00000011877.13	2271	2532	2256	2122	2205	2170	2259.35	-0.11992	0.0561818	-2.1345	0.0328021	0.235635
ENSMUSG00000029607	Ankrd61	ENSMUSG00000029607.14	186	188	187	158	123	165	167.705	-0.334012	0.156532	-2.13382	0.0328576	NA
ENSMUSG00000025531	Chm	ENSMUSG00000025531.14	559	501	577	585	629	649	583.366	0.189382	0.088757	2.13371	0.0328665	0.235835
ENSMUSG00000081487	Gm13689	ENSMUSG00000081487.1	4	10	4	2	1	0	3.6189	-2.5963	1.21685	-2.13363	0.0328729	NA
ENSMUSG00000081058	Hist2h3c2	ENSMUSG00000081058.5	16	16	17	8	6	7	11.6193	-1.21539	0.569861	-2.13278	0.0329424	NA
ENSMUSG00000028524	Sgip1	ENSMUSG00000028524.21	1731	1613	1762	1518	1599	1563	1631.05	-0.124369	0.0583219	-2.13246	0.0329692	0.23631
ENSMUSG00000073125	Xlr3b	ENSMUSG00000073125.10	59	23	84	24	35	36	43.5476	-0.800569	0.375425	-2.13243	0.0329711	NA
ENSMUSG00000009563	Tor2a	ENSMUSG00000009563.16	142	166	134	208	164	188	166.759	0.337595	0.15833	2.13222	0.0329887	NA
ENSMUSG00000006958	Chrd	ENSMUSG00000006958.14	206	164	193	264	204	231	210.196	0.310958	0.1459	2.1313	0.0330641	NA
ENSMUSG00000015766	Eps8	ENSMUSG00000015766.14	502	464	410	589	529	486	496.678	0.218068	0.102336	2.13091	0.0330969	0.236962
ENSMUSG00000048799	Cep120	ENSMUSG00000048799.7	694	725	638	628	575	616	646.064	-0.179127	0.0840989	-2.12996	0.0331748	0.237129
ENSMUSG00000048707	Tprn	ENSMUSG00000048707.9	319	319	290	378	376	339	336.693	0.233747	0.109754	2.12974	0.0331934	NA
ENSMUSG00000022139	Mbnl2	ENSMUSG00000022139.17	2670	2794	2648	2354	2551	2597	2602.31	-0.11157	0.0523939	-2.12946	0.0332165	0.237129
ENSMUSG00000062184	Hs6st2	ENSMUSG00000062184.11	552	563	536	468	486	495	516.382	-0.187241	0.0879359	-2.12929	0.0332304	0.237129
ENSMUSG00000022884	Eif4a2	ENSMUSG00000022884.15	5905	6012	6480	6515	6682	6430	6337.56	0.0933187	0.0438528	2.128	0.0333373	0.237291
ENSMUSG00000035299	Mid1	ENSMUSG00000035299.16	40	34	28	21	15	23	26.8685	-0.803224	0.37746	-2.12797	0.0333397	NA
ENSMUSG00000039478	Micu3	ENSMUSG00000039478.15	1123	1076	1133	1194	1217	1243	1164.29	0.134047	0.0629975	2.12782	0.0333522	0.237291
ENSMUSG00000030605	Mfge8	ENSMUSG00000030605.15	922	969	945	926	821	797	896.784	-0.160083	0.075238	-2.12768	0.0333633	0.237291
ENSMUSG00000089396	Gm23027	ENSMUSG00000089396.1	7	3	2	0	0	1	2.177	-3.4938	1.64344	-2.12591	0.0335112	NA
ENSMUSG00000020788	Atp2a3	ENSMUSG00000020788.15	649	623	568	621	486	481	571.399	-0.217131	0.10214	-2.12582	0.0335184	0.238132
ENSMUSG00000098233	Gm26954	ENSMUSG00000098233.1	188	174	190	164	107	160	163.758	-0.361361	0.170112	-2.12425	0.0336491	NA
ENSMUSG00000000740	Rpl13	ENSMUSG00000000740.12	1952	1856	1936	2234	2035	1988	2000.27	0.122147	0.0575139	2.12378	0.0336888	0.238566
ENSMUSG00000026463	Atp2b4	ENSMUSG00000026463.17	2351	2562	2438	1980	2125	2512	2327.94	-0.150398	0.0708169	-2.12376	0.03369	0.238566
ENSMUSG00000006740	Kif5b	ENSMUSG00000006740.13	3706	3539	3520	3323	3508	3183	3463.03	-0.104107	0.0490204	-2.12376	0.0336903	0.238566
ENSMUSG00000092680	Snord55	ENSMUSG00000092680.1	1	1	0	6	2	8	2.97913	3.00204	1.41403	2.12304	0.0337508	NA
ENSMUSG00000029276	Glmn	ENSMUSG00000029276.13	124	113	121	157	156	143	135.407	0.350279	0.164996	2.12296	0.0337571	NA
ENSMUSG00000033931	Rbm34	ENSMUSG00000033931.9	214	205	204	219	281	256	229.916	0.28486	0.134197	2.1227	0.0337786	NA
ENSMUSG00000024985	Tcf7l2	ENSMUSG00000024985.18	355	330	336	299	300	266	314.189	-0.238619	0.112434	-2.12232	0.0338112	NA
ENSMUSG00000025381	Cnpy2	ENSMUSG00000025381.3	286	251	282	315	343	313	298.608	0.245978	0.115958	2.12126	0.0338999	NA
ENSMUSG00000039753	Fbxl5	ENSMUSG00000039753.16	908	906	909	954	1002	1057	956.025	0.14744	0.0695214	2.12079	0.0339397	0.239996
ENSMUSG00000032096	Arcn1	ENSMUSG00000032096.16	1285	1316	1355	1371	1458	1496	1380.05	0.129694	0.0611631	2.12047	0.0339666	0.239996
ENSMUSG00000032182	Yipf2	ENSMUSG00000032182.15	326	311	312	360	363	384	342.745	0.224525	0.105948	2.1192	0.0340735	0.240488
ENSMUSG00000048439	Nupl2	ENSMUSG00000048439.15	58	61	68	82	84	92	74.1494	0.47105	0.222327	2.11872	0.0341137	NA
ENSMUSG00000019774	Mtrf1l	ENSMUSG00000019774.8	64	69	77	98	87	102	82.9466	0.449424	0.212153	2.1184	0.0341416	NA
ENSMUSG00000053950	Adnp2	ENSMUSG00000053950.10	286	272	293	263	235	211	260.04	-0.266321	0.125726	-2.11826	0.034153	NA
ENSMUSG00000047260	Emc6	ENSMUSG00000047260.4	293	310	288	367	360	323	323.439	0.235878	0.1114	2.11739	0.0342269	NA
ENSMUSG00000021102	Glrx5	ENSMUSG00000021102.4	468	494	506	573	568	533	523.319	0.187856	0.088729	2.11719	0.0342436	0.241425
ENSMUSG00000085788	4930470G03Rik	ENSMUSG00000085788.1	240	277	272	204	215	233	240.318	-0.272705	0.128815	-2.11702	0.034258	NA
ENSMUSG00000086814	Gm15677	ENSMUSG00000086814.1	2	0	0	5	7	5	2.98188	2.97142	1.40367	2.1169	0.0342685	NA
ENSMUSG00000029875	Ccdc184	ENSMUSG00000029875.5	344	354	341	324	277	282	320.37	-0.237736	0.112312	-2.11674	0.0342816	NA
ENSMUSG00000021244	Ylpm1	ENSMUSG00000021244.15	1387	1359	1209	1134	1156	1272	1252.75	-0.149802	0.0707701	-2.11674	0.0342823	0.241434
ENSMUSG00000037029	Zfp146	ENSMUSG00000037029.8	352	373	366	296	331	304	336.867	-0.228616	0.10802	-2.11642	0.0343089	NA
ENSMUSG00000038174	Fam126b	ENSMUSG00000038174.14	1502	1414	1456	1462	1735	1613	1530.21	0.140006	0.0662009	2.11487	0.0344411	0.242288
ENSMUSG00000096655	1700065D16Rik	ENSMUSG00000096655.2	4	2	3	14	8	7	6.456	1.70879	0.808008	2.11482	0.0344453	NA
ENSMUSG00000032047	Acat1	ENSMUSG00000032047.5	807	820	818	913	910	888	859.36	0.148039	0.0700251	2.11408	0.0345082	0.242496
ENSMUSG00000030255	Sspn	ENSMUSG00000030255.13	149	124	125	159	171	171	149.762	0.337869	0.159836	2.11385	0.0345281	NA
ENSMUSG00000037605	Adgrl3	ENSMUSG00000037605.16	1222	1170	1059	1054	1002	1057	1093.93	-0.14846	0.0702614	-2.11297	0.0346036	0.24261
ENSMUSG00000020894	Vamp2	ENSMUSG00000020894.16	6809	7289	7246	7472	7530	7628	7328.99	0.0843069	0.039906	2.11264	0.0346317	0.24261
ENSMUSG00000042390	Gatad2b	ENSMUSG00000042390.9	927	965	943	844	822	890	898.596	-0.149024	0.070561	-2.11199	0.034687	0.24261
ENSMUSG00000039913	Pak7	ENSMUSG00000039913.12	344	405	451	350	343	325	369.738	-0.240161	0.113719	-2.11189	0.0346959	0.24261
ENSMUSG00000041351	Rap1gap	ENSMUSG00000041351.16	2173	2033	1996	2026	1710	1915	1975.64	-0.135019	0.0639429	-2.11156	0.034724	0.24261
ENSMUSG00000031432	Prps1	ENSMUSG00000031432.3	542	560	578	603	634	661	596.327	0.177362	0.0840242	2.11085	0.0347853	0.24261
ENSMUSG00000020044	Timp3	ENSMUSG00000020044.13	1194	1200	1154	1039	1141	1039	1127.8	-0.139991	0.0663275	-2.1106	0.0348063	0.24261
ENSMUSG00000078307	AI593442	ENSMUSG00000078307.3	1623	1736	1699	1574	1513	1570	1619.14	-0.119783	0.0567586	-2.11039	0.034825	0.24261
ENSMUSG00000064351	mt-Co1	ENSMUSG00000064351.1	133769	132831	142384	151714	150056	134975	140955	0.0947282	0.0448986	2.10982	0.0348737	0.242613
ENSMUSG00000032518	Rpsa	ENSMUSG00000032518.6	2815	2768	2811	3138	3074	2830	2906.18	0.10667	0.0505661	2.10951	0.0349005	0.242613
ENSMUSG00000046432	Bex3	ENSMUSG00000046432.12	1151	1154	1300	1320	1396	1267	1264.64	0.144376	0.0684602	2.10891	0.0349523	0.242712
ENSMUSG00000032514	Ttc21a	ENSMUSG00000032514.11	37	40	40	16	22	31	30.9886	-0.748297	0.354868	-2.10867	0.0349734	NA
ENSMUSG00000028700	Pomgnt1	ENSMUSG00000028700.14	581	677	650	716	790	668	680.422	0.18672	0.0885844	2.10782	0.0350468	0.243107
ENSMUSG00000024558	Mapk4	ENSMUSG00000024558.12	536	596	571	447	531	506	531.119	-0.196686	0.0934031	-2.10577	0.0352242	0.244075
ENSMUSG00000038102	Trappc11	ENSMUSG00000038102.15	814	808	828	726	703	767	774.522	-0.157456	0.0747955	-2.10516	0.0352776	0.244183
ENSMUSG00000018906	P4ha2	ENSMUSG00000018906.14	135	143	125	105	108	99	119.285	-0.370602	0.176087	-2.10465	0.0353217	NA
ENSMUSG00000005699	Pard6a	ENSMUSG00000005699.16	197	188	208	242	236	240	218.557	0.275015	0.130689	2.10436	0.0353474	NA
ENSMUSG00000032870	Smap2	ENSMUSG00000032870.8	1757	1790	1701	1658	1543	1633	1680.45	-0.119164	0.0566465	-2.10364	0.03541	0.244664
ENSMUSG00000042628	Zfyve1	ENSMUSG00000042628.8	573	619	609	517	546	527	565.247	-0.179612	0.0853874	-2.10349	0.0354229	0.244664
ENSMUSG00000051146	Camk2n2	ENSMUSG00000051146.2	995	1053	1032	1180	1076	1145	1080.29	0.140728	0.0669259	2.10274	0.0354884	0.244854
ENSMUSG00000097229	Platr23	ENSMUSG00000097229.1	0	0	0	5	2	2	1.38908	3.91005	1.86009	2.10208	0.0355464	NA
ENSMUSG00000036698	Ago2	ENSMUSG00000036698.11	1467	1538	1453	1252	1352	1448	1418.15	-0.136269	0.0648457	-2.10144	0.0356027	0.245378
ENSMUSG00000019194	Scn1b	ENSMUSG00000019194.15	4281	4423	4266	4674	4675	4455	4462.3	0.0893904	0.0425464	2.10101	0.0356402	0.245378
ENSMUSG00000040659	Efhd2	ENSMUSG00000040659.3	2240	2397	2269	2118	2175	2117	2219.46	-0.107912	0.051373	-2.10056	0.0356798	0.245389
ENSMUSG00000046387	Pcdhb17	ENSMUSG00000046387.5	175	170	188	122	140	160	159.275	-0.332335	0.158242	-2.10017	0.0357135	NA
ENSMUSG00000097928	Gm26578	ENSMUSG00000097928.1	1	3	1	6	6	10	4.39065	2.13435	1.01657	2.09957	0.035767	NA
ENSMUSG00000039662	Icmt	ENSMUSG00000039662.16	1600	1560	1549	1484	1444	1407	1507.36	-0.119849	0.0571206	-2.09817	0.0358897	0.24657
ENSMUSG00000024217	Snrpc	ENSMUSG00000024217.9	236	209	231	179	193	181	204.878	-0.285979	0.136368	-2.09711	0.0359836	NA
ENSMUSG00000039686	Zer1	ENSMUSG00000039686.14	1525	1485	1480	1415	1223	1438	1427.53	-0.140698	0.067104	-2.09671	0.0360191	0.247196
ENSMUSG00000046603	Tcaim	ENSMUSG00000046603.16	175	150	159	191	226	184	180.777	0.314595	0.150166	2.09498	0.0361727	NA
ENSMUSG00000024962	Vegfb	ENSMUSG00000024962.13	379	415	417	498	504	411	437.356	0.219472	0.10479	2.0944	0.0362246	0.248125
ENSMUSG00000087026	A230103J11Rik	ENSMUSG00000087026.7	407	411	431	360	358	362	388.307	-0.208474	0.0995502	-2.09416	0.0362457	0.248125
ENSMUSG00000033618	Map3k13	ENSMUSG00000033618.7	407	484	400	363	377	369	399.97	-0.221422	0.105747	-2.09389	0.0362697	0.248125
ENSMUSG00000072812	Ahnak2	ENSMUSG00000072812.4	53	59	59	44	37	35	47.8164	-0.578596	0.276481	-2.09271	0.0363748	NA
ENSMUSG00000041923	Nol4	ENSMUSG00000041923.15	811	860	911	733	778	798	815.026	-0.159552	0.0762483	-2.09254	0.0363904	0.248687
ENSMUSG00000112714	Gm4798	ENSMUSG00000112714.1	13	20	9	7	5	5	9.56824	-1.36505	0.652353	-2.0925	0.0363941	NA
ENSMUSG00000037072	Selenof	ENSMUSG00000037072.15	1401	1303	1574	1667	1649	1449	1507.38	0.15507	0.0741266	2.09196	0.0364422	0.248778
ENSMUSG00000039997	Ifi203	ENSMUSG00000039997.16	22	32	42	18	20	16	24.9573	-0.837276	0.400308	-2.09158	0.036476	NA
ENSMUSG00000009356	Lpo	ENSMUSG00000009356.12	26	12	17	22	40	38	25.7455	0.856169	0.409531	2.09061	0.0365631	NA
ENSMUSG00000031358	Msl3	ENSMUSG00000031358.17	174	160	171	233	188	204	188.354	0.303742	0.145295	2.09053	0.0365705	NA
ENSMUSG00000038982	Bloc1s5	ENSMUSG00000038982.10	172	149	149	195	191	194	175.056	0.306469	0.14673	2.08867	0.0367379	NA
ENSMUSG00000032238	Rora	ENSMUSG00000032238.17	1523	1513	1622	1741	1657	1665	1620.34	0.119908	0.0574448	2.08736	0.0368557	0.251335
ENSMUSG00000001150	Mcm3ap	ENSMUSG00000001150.7	580	584	583	539	496	510	548.647	-0.179252	0.085898	-2.08681	0.0369057	0.251389
ENSMUSG00000039477	Tnrc18	ENSMUSG00000039477.16	1223	1365	1325	1199	1135	1226	1245.53	-0.137455	0.0658813	-2.08641	0.0369415	0.251389
ENSMUSG00000085182	Gm13596	ENSMUSG00000085182.1	0	0	0	3	3	2	1.35375	3.88119	1.86046	2.08615	0.036965	NA
ENSMUSG00000099759	1700030C10Rik	ENSMUSG00000099759.1	1	1	0	7	3	5	2.87118	2.93329	1.40625	2.08589	0.0369887	NA
ENSMUSG00000023971	Rrp36	ENSMUSG00000023971.8	113	133	118	97	91	91	107.186	-0.387398	0.185846	-2.08452	0.0371131	NA
ENSMUSG00000036873	2410004B18Rik	ENSMUSG00000036873.13	236	230	216	270	280	264	249.472	0.25622	0.122953	2.08389	0.0371702	NA
ENSMUSG00000029221	Slc30a9	ENSMUSG00000029221.15	1429	1552	1500	1627	1647	1599	1558.78	0.120431	0.0577924	2.08385	0.0371734	0.252701
ENSMUSG00000020528	Prpsap2	ENSMUSG00000020528.14	239	261	261	282	321	301	277.44	0.248121	0.119091	2.08346	0.0372094	NA
ENSMUSG00000018844	Fndc8	ENSMUSG00000018844.6	25	25	33	10	19	16	21.383	-0.883783	0.424215	-2.08333	0.0372207	NA
ENSMUSG00000052794	1700030K09Rik	ENSMUSG00000052794.13	162	150	132	113	110	123	131.542	-0.35518	0.170498	-2.08319	0.0372337	NA
ENSMUSG00000035513	Ntng2	ENSMUSG00000035513.19	218	222	206	181	165	183	195.866	-0.288435	0.138475	-2.08293	0.0372572	NA
ENSMUSG00000035969	Rusc2	ENSMUSG00000035969.15	1465	1518	1339	1329	1280	1334	1377.65	-0.132973	0.0638451	-2.08274	0.0372751	0.253126
ENSMUSG00000028530	Jak1	ENSMUSG00000028530.14	1626	1748	1703	1555	1501	1613	1624.4	-0.121003	0.0581185	-2.082	0.037342	0.253255
ENSMUSG00000020463	Ppp4r3b	ENSMUSG00000020463.15	556	509	581	588	617	663	585.691	0.184723	0.0887442	2.08153	0.0373857	0.253255
ENSMUSG00000109274	Gm45133	ENSMUSG00000109274.1	276	280	316	405	315	324	319.328	0.255477	0.122736	2.08152	0.0373866	NA
ENSMUSG00000022822	Abcc5	ENSMUSG00000022822.16	2030	2089	2058	1869	1785	2029	1976.54	-0.119836	0.0575835	-2.08108	0.0374266	0.253255
ENSMUSG00000005357	Slc1a6	ENSMUSG00000005357.9	350	325	361	312	297	274	319.768	-0.233698	0.11231	-2.08082	0.0374503	NA
ENSMUSG00000057531	Dtnbp1	ENSMUSG00000057531.14	433	424	425	498	474	493	457.882	0.19202	0.0922919	2.08057	0.0374734	0.253255
ENSMUSG00000029207	Apbb2	ENSMUSG00000029207.16	549	506	494	473	451	430	483.672	-0.194168	0.093344	-2.08014	0.0375129	0.253255
ENSMUSG00000013523	Bcas1	ENSMUSG00000013523.13	2508	2250	2337	2332	2076	2109	2268.83	-0.123406	0.0593327	-2.0799	0.0375343	0.253255
ENSMUSG00000022185	Acin1	ENSMUSG00000022185.19	1508	1711	1526	1433	1374	1513	1510.73	-0.136252	0.065527	-2.07933	0.0375869	0.253255
ENSMUSG00000040907	Atp1a3	ENSMUSG00000040907.15	21217	23179	19551	19411	17199	19463	20003.3	-0.189627	0.0912062	-2.0791	0.0376079	0.253255
ENSMUSG00000074625	Arhgap40	ENSMUSG00000074625.10	5	9	4	3	0	0	3.67382	-2.56612	1.23451	-2.07865	0.0376495	NA
ENSMUSG00000089817	Gm7162	ENSMUSG00000089817.1	12	12	17	32	27	18	19.7847	0.928431	0.446766	2.07811	0.0376989	NA
ENSMUSG00000036112	Metap2	ENSMUSG00000036112.15	885	806	911	966	946	974	914.562	0.150307	0.0723316	2.07802	0.0377073	0.253614
ENSMUSG00000024851	Pitpnm1	ENSMUSG00000024851.13	1909	2004	1886	2194	1995	2099	2014.52	0.115384	0.0555352	2.07767	0.0377397	0.253614
ENSMUSG00000111877	Gm6477	ENSMUSG00000111877.1	7	12	22	3	5	7	9.51073	-1.40612	0.676897	-2.07731	0.037773	NA
ENSMUSG00000059213	Ddn	ENSMUSG00000059213.7	5852	6478	5705	6489	6762	6172	6243.03	0.106595	0.0513159	2.07724	0.0377797	0.253619
ENSMUSG00000106791	4930553P18Rik	ENSMUSG00000106791.1	10	12	15	5	2	7	8.58341	-1.4427	0.694573	-2.0771	0.0377921	NA
ENSMUSG00000025366	Esyt1	ENSMUSG00000025366.8	270	262	229	219	216	195	231.779	-0.27306	0.131473	-2.07693	0.0378083	NA
ENSMUSG00000002578	Ikzf4	ENSMUSG00000002578.17	138	128	120	152	168	165	145.103	0.333218	0.160463	2.0766	0.0378384	NA
ENSMUSG00000021266	Wars	ENSMUSG00000021266.16	1078	1052	907	894	889	937	959.538	-0.158897	0.0765199	-2.07655	0.037843	0.25378
ENSMUSG00000021196	Pfkp	ENSMUSG00000021196.14	3499	3645	3223	3241	3145	3247	3333.38	-0.106384	0.0512592	-2.07541	0.0379482	0.25412
ENSMUSG00000026384	Ptpn4	ENSMUSG00000026384.13	1814	1603	1765	1906	1807	1934	1804.97	0.124976	0.0602249	2.07515	0.0379724	0.25412
ENSMUSG00000020953	Coch	ENSMUSG00000020953.17	300	279	310	254	244	252	273.144	-0.245377	0.118253	-2.07501	0.0379852	NA
ENSMUSG00000103477	5930409G06Rik	ENSMUSG00000103477.1	23	17	22	29	30	47	27.9434	0.781559	0.376772	2.07435	0.0380464	NA
ENSMUSG00000110711	Gm45760	ENSMUSG00000110711.1	747	845	722	602	703	727	724.131	-0.185337	0.0893641	-2.07395	0.0380838	0.254602
ENSMUSG00000050272	Dscam	ENSMUSG00000050272.9	789	693	715	618	603	712	688.25	-0.18188	0.0877452	-2.07282	0.0381892	0.255042
ENSMUSG00000024639	Gnaq	ENSMUSG00000024639.5	2426	2431	2386	2162	2195	2361	2326.61	-0.107686	0.051966	-2.07224	0.038243	0.255138
ENSMUSG00000040025	Ythdf2	ENSMUSG00000040025.17	313	356	342	288	291	282	311.802	-0.232373	0.112179	-2.07144	0.0383179	NA
ENSMUSG00000103092	Pcdha5	ENSMUSG00000103092.1	69	61	51	43	37	43	50.5889	-0.564119	0.272405	-2.07089	0.0383694	NA
ENSMUSG00000019302	Atp6v0a1	ENSMUSG00000019302.16	4419	4660	4315	4120	3963	4395	4312.08	-0.102157	0.0493327	-2.07077	0.0383801	0.255788
ENSMUSG00000039396	Neil3	ENSMUSG00000039396.11	1	0	1	8	2	5	2.91884	2.93249	1.41634	2.07047	0.0384088	NA
ENSMUSG00000064302	Clasp1	ENSMUSG00000064302.13	1217	1225	1089	1044	997	1138	1118.3	-0.150424	0.0726616	-2.0702	0.0384334	0.25588
ENSMUSG00000085987	Gm13403	ENSMUSG00000085987.2	3	2	3	0	0	0	1.33754	-3.86089	1.86499	-2.07019	0.0384341	NA
ENSMUSG00000029199	Lias	ENSMUSG00000029199.11	292	257	311	349	354	314	312.567	0.242076	0.116952	2.06988	0.0384637	NA
ENSMUSG00000029594	Rbm19	ENSMUSG00000029594.12	153	165	157	126	115	135	141.853	-0.335869	0.16239	-2.06829	0.0386132	NA
ENSMUSG00000021967	Mrpl57	ENSMUSG00000021967.4	281	247	259	333	350	264	289.008	0.265201	0.128252	2.06781	0.0386579	NA
ENSMUSG00000053550	Shisa7	ENSMUSG00000053550.13	921	1014	921	863	783	911	902.233	-0.16012	0.0774758	-2.06671	0.0387611	0.257796
ENSMUSG00000020647	Ncoa1	ENSMUSG00000020647.10	1311	1384	1353	1206	1232	1271	1292.82	-0.12593	0.060954	-2.06599	0.0388297	0.257986
ENSMUSG00000048677	Tpcn2	ENSMUSG00000048677.9	63	44	58	68	74	91	66.3684	0.507619	0.245706	2.06596	0.038832	NA
ENSMUSG00000038173	Enpp6	ENSMUSG00000038173.15	148	127	168	179	195	178	165.835	0.323346	0.156542	2.06555	0.0388708	NA
ENSMUSG00000027375	Mal	ENSMUSG00000027375.14	3475	3328	3570	3287	3218	3209	3347.93	-0.0947706	0.0458979	-2.06481	0.0389405	0.258456
ENSMUSG00000024077	Strn	ENSMUSG00000024077.15	1170	1298	1257	1130	1163	1099	1186.2	-0.135376	0.0655793	-2.06431	0.0389884	0.258508
ENSMUSG00000027088	Phospho2	ENSMUSG00000027088.10	239	219	250	292	319	244	260.574	0.271369	0.13153	2.06317	0.0390962	NA
ENSMUSG00000025971	Maip1	ENSMUSG00000025971.6	191	185	180	215	237	222	204.992	0.278408	0.134964	2.06283	0.0391285	NA
ENSMUSG00000055024	Ep300	ENSMUSG00000055024.12	845	872	819	798	690	782	801.138	-0.161627	0.0783634	-2.06253	0.0391572	0.259157
ENSMUSG00000087644	Gm14703	ENSMUSG00000087644.1	6171	6510	6319	6195	5594	6025	6135.67	-0.0936078	0.045393	-2.06216	0.0391922	0.259157
ENSMUSG00000015337	Endog	ENSMUSG00000015337.5	178	129	148	207	193	172	171.256	0.328611	0.159386	2.06173	0.0392337	NA
ENSMUSG00000097006	9530082P21Rik	ENSMUSG00000097006.7	922	920	915	801	825	864	874.508	-0.145551	0.0705973	-2.0617	0.0392361	0.259157
ENSMUSG00000038900	Rpl12	ENSMUSG00000038900.17	989	1059	1029	1200	1192	1029	1083.05	0.150626	0.0730764	2.06121	0.0392828	0.259157
ENSMUSG00000060938	Rpl26	ENSMUSG00000060938.14	1119	1078	1151	1323	1262	1124	1176.34	0.145996	0.0708397	2.06094	0.0393086	0.259157
ENSMUSG00000036819	Jmjd4	ENSMUSG00000036819.14	352	302	299	357	400	360	344.818	0.230838	0.112017	2.06075	0.0393271	0.259157
ENSMUSG00000033916	Chmp2a	ENSMUSG00000033916.5	599	651	650	738	726	673	672.935	0.167528	0.0813234	2.06002	0.0393965	0.25935
ENSMUSG00000114961	A930002C04Rik	ENSMUSG00000114961.1	3	0	3	16	4	5	5.26498	2.04924	0.994783	2.05999	0.0393999	NA
ENSMUSG00000039095	En2	ENSMUSG00000039095.8	230	264	272	380	281	275	283.511	0.282077	0.136947	2.05974	0.039423	NA
ENSMUSG00000019232	Etnppl	ENSMUSG00000019232.14	396	357	374	426	446	426	404.111	0.20457	0.0993364	2.05937	0.039459	0.259497
ENSMUSG00000108181	C030015A19Rik	ENSMUSG00000108181.1	43	38	36	18	20	32	31.2801	-0.72757	0.353514	-2.05811	0.0395797	NA
ENSMUSG00000027335	Adra1d	ENSMUSG00000027335.9	229	264	191	164	184	203	205.852	-0.31012	0.150771	-2.05689	0.0396964	NA
ENSMUSG00000028760	Eif4g3	ENSMUSG00000028760.16	2683	2671	2520	2441	2308	2550	2528.93	-0.109397	0.0532394	-2.05481	0.0398974	0.262113
ENSMUSG00000005583	Mef2c	ENSMUSG00000005583.16	3507	3616	3728	3069	3596	3356	3478.63	-0.113646	0.0553496	-2.05325	0.0400486	0.262612
ENSMUSG00000038055	Dexi	ENSMUSG00000038055.12	300	346	352	372	400	392	360.247	0.220656	0.10747	2.05319	0.0400546	0.262612
ENSMUSG00000032126	Hmbs	ENSMUSG00000032126.16	100	75	92	127	109	115	103.052	0.399853	0.194757	2.05308	0.0400644	NA
ENSMUSG00000027674	Pex5l	ENSMUSG00000027674.16	2317	2228	2288	1919	2173	2192	2186.25	-0.118655	0.0578083	-2.05257	0.0401146	0.262695
ENSMUSG00000035168	Tanc1	ENSMUSG00000035168.16	643	697	621	615	528	589	615.597	-0.181113	0.0882526	-2.05222	0.0401486	0.262695
ENSMUSG00000048482	Bdnf	ENSMUSG00000048482.14	287	338	289	224	254	284	279.212	-0.26089	0.127135	-2.05208	0.0401621	NA
ENSMUSG00000026725	Tnn	ENSMUSG00000026725.17	4	1	2	10	7	8	5.39413	1.83702	0.895893	2.05049	0.0403165	NA
ENSMUSG00000029440	Psmd9	ENSMUSG00000029440.15	245	255	278	219	214	218	238.38	-0.259287	0.126453	-2.05047	0.0403188	NA
ENSMUSG00000105556	Gm43080	ENSMUSG00000105556.1	24	22	18	8	11	13	16.1298	-0.99028	0.482985	-2.05033	0.0403321	NA
ENSMUSG00000040415	Dtx3	ENSMUSG00000040415.15	1457	1322	1409	1559	1506	1499	1458.69	0.123615	0.0602958	2.05015	0.04035	0.263745
ENSMUSG00000020422	Tns3	ENSMUSG00000020422.13	990	968	887	882	826	858	901.81	-0.149299	0.072871	-2.04881	0.0404806	0.263797
ENSMUSG00000031303	Map3k15	ENSMUSG00000031303.8	832	825	892	975	951	900	895.659	0.147709	0.0721037	2.04856	0.0405048	0.263797
ENSMUSG00000025666	Tmem47	ENSMUSG00000025666.16	1293	1257	1316	1357	1473	1385	1346.88	0.125548	0.061293	2.04832	0.0405283	0.263797
ENSMUSG00000060794	Tssk5	ENSMUSG00000060794.8	6	3	2	14	9	9	7.25545	1.5512	0.757303	2.04832	0.0405285	NA
ENSMUSG00000007564	Ppp2r1a	ENSMUSG00000007564.15	4690	4849	4502	4471	4377	4359	4541.39	-0.0887322	0.0433261	-2.04801	0.040559	0.263797
ENSMUSG00000025162	Csnk1d	ENSMUSG00000025162.17	1508	1548	1498	1369	1372	1449	1457.45	-0.119497	0.0583488	-2.04798	0.0405622	0.263797
ENSMUSG00000031785	Adgrg1	ENSMUSG00000031785.16	820	755	678	617	677	695	706.86	-0.178088	0.086982	-2.04742	0.0406173	0.26389
ENSMUSG00000038718	Pbx3	ENSMUSG00000038718.15	217	213	209	238	275	253	234.202	0.262248	0.128126	2.0468	0.0406776	NA
ENSMUSG00000007850	Hnrnph1	ENSMUSG00000007850.16	3011	2990	3086	2843	2831	2850	2935.42	-0.0923073	0.0451102	-2.04626	0.0407307	0.264361
ENSMUSG00000070858	Gm1673	ENSMUSG00000070858.12	165	184	183	221	213	214	196.63	0.281929	0.137873	2.04485	0.0408696	NA
ENSMUSG00000001098	Kctd10	ENSMUSG00000001098.15	514	569	558	463	484	497	514.082	-0.18431	0.0901401	-2.0447	0.0408843	0.26442
ENSMUSG00000020802	Ube2o	ENSMUSG00000020802.8	1459	1559	1389	1403	1248	1365	1403.97	-0.135558	0.0663028	-2.04452	0.0409019	0.26442
ENSMUSG00000093880	Tmem181c-ps	ENSMUSG00000093880.3	18	12	9	27	26	21	18.8314	0.926268	0.453167	2.04399	0.0409546	NA
ENSMUSG00000062234	Gak	ENSMUSG00000062234.14	984	1050	973	910	867	944	954.698	-0.144186	0.0705429	-2.04394	0.0409592	0.26442
ENSMUSG00000024777	Ppp2r5b	ENSMUSG00000024777.9	1106	1109	1061	1174	1217	1190	1142.73	0.129089	0.0631608	2.04381	0.040972	0.26442
ENSMUSG00000040423	Rc3h1	ENSMUSG00000040423.10	676	641	711	617	588	600	638.694	-0.167451	0.0819462	-2.04342	0.0410106	0.26442
ENSMUSG00000047495	Dlgap2	ENSMUSG00000047495.15	474	459	426	379	393	410	423.552	-0.200337	0.0980401	-2.04342	0.0410107	0.26442
ENSMUSG00000002504	Slc9a3r2	ENSMUSG00000002504.14	460	535	450	598	556	511	518.398	0.200228	0.0979942	2.04326	0.0410265	0.26442
ENSMUSG00000085517	Gm12963	ENSMUSG00000085517.7	13	6	6	20	14	19	12.8657	1.13831	0.557726	2.04099	0.0412519	NA
ENSMUSG00000063800	Prpf38a	ENSMUSG00000063800.5	184	210	225	245	278	229	228.483	0.278942	0.136697	2.04058	0.0412929	NA
ENSMUSG00000025898	Cwf19l2	ENSMUSG00000025898.6	130	133	158	159	175	191	157.838	0.324323	0.158946	2.04046	0.0413041	NA
ENSMUSG00000006154	Eps8l1	ENSMUSG00000006154.13	122	132	155	99	118	99	120.785	-0.369902	0.181349	-2.03973	0.0413774	NA
ENSMUSG00000102516	Gm38340	ENSMUSG00000102516.1	2	2	1	6	7	8	4.26236	2.05895	1.00964	2.03929	0.0414213	NA
ENSMUSG00000025204	Ndufb8	ENSMUSG00000025204.10	454	514	515	547	606	538	529.093	0.189547	0.0929664	2.03888	0.0414625	0.266964
ENSMUSG00000079505	Gm11131	ENSMUSG00000079505.2	25	24	21	15	9	13	17.9581	-0.929833	0.456136	-2.0385	0.0414999	NA
ENSMUSG00000064897	Gm22504	ENSMUSG00000064897.1	1	4	6	16	8	9	7.27741	1.5829	0.776522	2.03844	0.0415058	NA
ENSMUSG00000056820	Tsnax	ENSMUSG00000056820.7	1846	1745	1829	2065	2011	1822	1886.24	0.12093	0.0593424	2.03784	0.0415658	0.267363
ENSMUSG00000043313	Pcdhb19	ENSMUSG00000043313.6	151	124	111	89	102	103	113.271	-0.384919	0.188894	-2.03775	0.0415754	NA
ENSMUSG00000055003	Lrtm2	ENSMUSG00000055003.14	632	646	641	525	548	621	602.444	-0.17799	0.0873647	-2.03732	0.0416183	0.267434
ENSMUSG00000085165	Gm12089	ENSMUSG00000085165.1	2	4	2	0	0	0	1.30561	-3.8335	1.88206	-2.03686	0.0416637	NA
ENSMUSG00000054986	Sec14l3	ENSMUSG00000054986.13	6	5	9	12	12	23	11.1129	1.23693	0.607588	2.03581	0.0417695	NA
ENSMUSG00000057182	Scn3a	ENSMUSG00000057182.14	563	560	601	498	493	532	541.091	-0.17848	0.0876703	-2.03581	0.0417697	0.26814
ENSMUSG00000026924	Sec16a	ENSMUSG00000026924.17	678	682	660	562	602	631	635.993	-0.167122	0.0821388	-2.03463	0.0418882	0.268617
ENSMUSG00000020646	Mboat2	ENSMUSG00000020646.17	457	470	506	525	535	567	510.096	0.184199	0.0905491	2.03424	0.0419272	0.268617
ENSMUSG00000072572	Slc39a2	ENSMUSG00000072572.9	90	62	77	54	53	56	65.4828	-0.49428	0.243031	-2.03382	0.0419699	NA
ENSMUSG00000003039	Fam32a	ENSMUSG00000003039.9	774	787	794	894	886	831	827.676	0.147485	0.0725728	2.03224	0.0421296	0.269414
ENSMUSG00000097412	1810014B01Rik	ENSMUSG00000097412.2	1269	1327	1255	1233	1120	1169	1228.93	-0.130349	0.0641424	-2.03218	0.042135	0.269414
ENSMUSG00000041238	Rbbp8	ENSMUSG00000041238.15	58	60	52	37	40	38	47.4248	-0.559478	0.275328	-2.03204	0.0421496	NA
ENSMUSG00000096768	Gm47283	ENSMUSG00000096768.7	19	5	21	68	36	22	28.427	1.4962	0.73653	2.03142	0.0422128	NA
ENSMUSG00000096014	Sox1	ENSMUSG00000096014.1	186	163	135	223	189	191	181.001	0.315795	0.155466	2.03129	0.0422259	NA
ENSMUSG00000053004	Hrh1	ENSMUSG00000053004.9	136	141	158	107	110	124	129.34	-0.34707	0.170893	-2.03093	0.0422625	NA
ENSMUSG00000109517	Gm44763	ENSMUSG00000109517.1	15	13	8	29	23	18	17.5934	0.956857	0.471372	2.02994	0.0423629	NA
ENSMUSG00000082809	Gm14150	ENSMUSG00000082809.3	46	45	48	38	27	25	38.2102	-0.637943	0.314282	-2.02984	0.0423727	NA
ENSMUSG00000030757	Zkscan2	ENSMUSG00000030757.13	246	228	286	298	310	295	277.15	0.249273	0.122814	2.02969	0.0423883	NA
ENSMUSG00000025085	Ablim1	ENSMUSG00000025085.16	1785	1844	1723	1714	1633	1600	1716.54	-0.115054	0.0566989	-2.02921	0.0424374	0.271079
ENSMUSG00000026923	Notch1	ENSMUSG00000026923.15	338	360	339	297	284	308	320.976	-0.222778	0.109802	-2.02891	0.0424671	NA
ENSMUSG00000114393	Gm47359	ENSMUSG00000114393.1	4	4	3	0	1	0	1.97993	-3.34832	1.65069	-2.02844	0.0425155	NA
ENSMUSG00000031600	Vps37a	ENSMUSG00000031600.10	794	848	749	893	841	932	842.743	0.15567	0.0767797	2.02748	0.0426131	0.271933
ENSMUSG00000027635	Dsn1	ENSMUSG00000027635.15	23	30	17	37	38	40	30.8153	0.712737	0.351632	2.02694	0.0426688	NA
ENSMUSG00000039842	Mcph1	ENSMUSG00000039842.15	92	79	90	115	117	110	100.687	0.386793	0.190847	2.02672	0.0426911	NA
ENSMUSG00000011658	Fuz	ENSMUSG00000011658.16	814	769	753	717	677	705	739.127	-0.155115	0.0765593	-2.02607	0.0427572	0.272583
ENSMUSG00000002835	Chaf1a	ENSMUSG00000002835.8	51	40	39	62	65	61	53.2273	0.533513	0.263369	2.02572	0.0427933	NA
ENSMUSG00000029298	Gbp9	ENSMUSG00000029298.15	55	44	52	73	85	58	60.9724	0.516606	0.255058	2.02545	0.0428216	NA
ENSMUSG00000050910	Cdr2l	ENSMUSG00000050910.5	379	384	354	353	288	316	345.624	-0.22517	0.111244	-2.02411	0.0429589	0.273081
ENSMUSG00000038331	Satb2	ENSMUSG00000038331.15	378	410	413	271	323	407	367.081	-0.255896	0.126429	-2.02402	0.0429677	0.273081
ENSMUSG00000046330	Rpl37a	ENSMUSG00000046330.10	1036	1118	974	1253	1187	1051	1103.36	0.155592	0.0768794	2.02384	0.0429864	0.273081
ENSMUSG00000033124	Atg9a	ENSMUSG00000033124.15	622	632	586	554	519	561	579.027	-0.172631	0.085306	-2.02367	0.0430046	0.273081
ENSMUSG00000071341	Egr4	ENSMUSG00000071341.4	262	292	265	187	242	248	249.565	-0.270777	0.133875	-2.02261	0.043113	NA
ENSMUSG00000022594	Lynx1	ENSMUSG00000022594.14	4329	4666	4152	4804	4618	4651	4536.51	0.0975132	0.0482332	2.0217	0.0432069	0.273953
ENSMUSG00000047989	Ino80c	ENSMUSG00000047989.11	208	160	192	227	234	220	206.797	0.284808	0.140879	2.02166	0.0432118	NA
ENSMUSG00000027406	Idh3b	ENSMUSG00000027406.12	1875	1922	1902	2036	2035	2051	1970.25	0.102962	0.050937	2.02136	0.0432427	0.273953
ENSMUSG00000022186	Oxct1	ENSMUSG00000022186.14	2634	2426	2782	2762	2923	2785	2718.6	0.112026	0.0554384	2.02074	0.0433071	0.273953
ENSMUSG00000013663	Pten	ENSMUSG00000013663.7	1395	1473	1465	1516	1619	1567	1505.76	0.118148	0.0584699	2.02067	0.0433141	0.273953
ENSMUSG00000051375	Pcdh1	ENSMUSG00000051375.15	2038	2214	1955	1873	1807	2016	1983.86	-0.124023	0.061389	-2.02028	0.0433539	0.273953
ENSMUSG00000044502	Bod1	ENSMUSG00000044502.16	524	555	521	602	630	575	567.714	0.173705	0.0860584	2.01846	0.0435438	0.274883
ENSMUSG00000096826	Ccl27b	ENSMUSG00000096826.1	12	2	9	2	0	3	4.58384	-2.15748	1.06908	-2.01807	0.043584	NA
ENSMUSG00000032482	Cspg5	ENSMUSG00000032482.9	2027	2308	2140	2324	2358	2319	2245.93	0.112069	0.0555875	2.01609	0.0437906	0.276098
ENSMUSG00000028369	Svep1	ENSMUSG00000028369.15	119	119	139	97	90	104	111.223	-0.371476	0.184263	-2.016	0.0437996	NA
ENSMUSG00000087367	Gm15491	ENSMUSG00000087367.1	434	480	444	349	414	412	422.098	-0.206941	0.10266	-2.01579	0.0438217	0.276098
ENSMUSG00000010406	Mrpl52	ENSMUSG00000010406.12	185	156	157	218	205	188	184.562	0.295624	0.146763	2.01429	0.043979	NA
ENSMUSG00000034714	Ttyh2	ENSMUSG00000034714.9	601	579	515	512	486	495	531.344	-0.183845	0.0912775	-2.01413	0.0439956	0.276923
ENSMUSG00000075266	Cenpw	ENSMUSG00000075266.5	23	12	7	25	37	19	20.6013	0.954715	0.474098	2.01375	0.0440356	NA
ENSMUSG00000082536	Gm13456	ENSMUSG00000082536.1	89	121	105	81	86	70	91.824	-0.418976	0.208129	-2.01306	0.0441083	NA
ENSMUSG00000031007	Atp6ap2	ENSMUSG00000031007.2	2397	2353	2488	2251	2290	2211	2331.6	-0.100377	0.0499032	-2.01143	0.0442804	0.27823
ENSMUSG00000105477	Gm47307	ENSMUSG00000105477.1	16	7	10	2	5	5	7.47263	-1.49089	0.74122	-2.0114	0.0442828	NA
ENSMUSG00000020841	Cpd	ENSMUSG00000020841.5	1290	1237	1320	1208	1181	1137	1228.75	-0.126381	0.0628342	-2.01134	0.0442893	0.27823
ENSMUSG00000097159	Gm26517	ENSMUSG00000097159.1	38	28	29	22	14	19	25.0252	-0.783983	0.389817	-2.01116	0.0443088	NA
ENSMUSG00000030662	Ipo5	ENSMUSG00000030662.10	1347	1360	1269	1264	1171	1209	1269.89	-0.126796	0.063095	-2.0096	0.0444735	0.278885
ENSMUSG00000025332	Kdm5c	ENSMUSG00000025332.14	702	693	653	624	562	638	645.214	-0.168358	0.0837806	-2.00951	0.0444826	0.278885
ENSMUSG00000018076	Med13l	ENSMUSG00000018076.12	1043	1147	972	991	949	913	1002.57	-0.150269	0.0747927	-2.00913	0.0445231	0.278885
ENSMUSG00000114590	5930438M14Rik	ENSMUSG00000114590.1	9	6	16	7	3	0	6.81157	-1.73258	0.862772	-2.00816	0.0446267	NA
ENSMUSG00000029554	Mad1l1	ENSMUSG00000029554.15	156	163	145	120	125	124	138.993	-0.326504	0.16259	-2.00814	0.0446281	NA
ENSMUSG00000097167	Gm16740	ENSMUSG00000097167.1	551	582	597	714	626	618	614.527	0.174888	0.0871121	2.00762	0.0446842	0.279372
ENSMUSG00000004568	Arhgef18	ENSMUSG00000004568.12	608	541	533	514	486	482	527.469	-0.18283	0.0910697	-2.00759	0.0446874	0.279372
ENSMUSG00000019362	D8Ertd738e	ENSMUSG00000019362.8	373	294	359	400	412	385	370.559	0.223303	0.111277	2.00673	0.0447782	0.279669
ENSMUSG00000105245	Gm31305	ENSMUSG00000105245.1	53	38	56	33	31	32	40.7666	-0.613328	0.305638	-2.00671	0.0447805	NA
ENSMUSG00000022216	Psme1	ENSMUSG00000022216.17	197	207	201	236	252	237	221.547	0.259808	0.129523	2.00589	0.044868	NA
ENSMUSG00000036181	Hist1h1c	ENSMUSG00000036181.2	235	245	220	186	200	196	213.608	-0.266387	0.132841	-2.00531	0.0449304	NA
ENSMUSG00000040481	Bptf	ENSMUSG00000040481.17	1538	1483	1444	1318	1310	1458	1424.94	-0.126499	0.0630991	-2.00477	0.0449882	0.280445
ENSMUSG00000041638	Gcn1l1	ENSMUSG00000041638.18	800	888	733	783	658	705	761.043	-0.177301	0.0884404	-2.00475	0.0449894	0.280445
ENSMUSG00000090026	Gm15996	ENSMUSG00000090026.1	36	33	34	54	46	53	42.6632	0.583094	0.291012	2.00368	0.0451048	NA
ENSMUSG00000042870	Tom1	ENSMUSG00000042870.15	114	129	120	119	75	82	106.687	-0.404995	0.202153	-2.00341	0.0451332	NA
ENSMUSG00000085492	Trmt61b	ENSMUSG00000085492.7	78	76	66	94	103	97	85.6042	0.413951	0.206667	2.00299	0.0451788	NA
ENSMUSG00000034757	Tmub2	ENSMUSG00000034757.15	544	527	543	477	462	489	506.976	-0.177102	0.0884448	-2.0024	0.0452414	0.281745
ENSMUSG00000027488	Snta1	ENSMUSG00000027488.12	243	279	277	202	252	211	244.229	-0.264921	0.132319	-2.00215	0.0452689	NA
ENSMUSG00000048920	Fkrp	ENSMUSG00000048920.8	394	452	417	447	517	485	451.96	0.198307	0.0990573	2.00194	0.0452907	0.281779
ENSMUSG00000027015	Cybrd1	ENSMUSG00000027015.4	34	29	23	15	17	16	22.335	-0.815969	0.407675	-2.00152	0.0453365	NA
ENSMUSG00000007440	Pcdha11	ENSMUSG00000007440.10	40	27	48	30	15	24	30.6699	-0.749246	0.37437	-2.00135	0.0453547	NA
ENSMUSG00000003032	Klf4	ENSMUSG00000003032.8	70	115	99	70	76	59	81.6045	-0.463244	0.231506	-2.001	0.045392	NA
ENSMUSG00000028838	Extl1	ENSMUSG00000028838.11	533	523	488	438	483	435	483.133	-0.187321	0.0936158	-2.00095	0.0453977	0.281995
ENSMUSG00000100228	Gm29257	ENSMUSG00000100228.1	0	0	0	1	4	3	1.27849	3.8177	1.90805	2.00084	0.0454096	NA
ENSMUSG00000031239	Itm2a	ENSMUSG00000031239.5	457	441	531	527	576	530	510.326	0.192774	0.096348	2.00081	0.0454126	0.281995
ENSMUSG00000032578	Cish	ENSMUSG00000032578.7	74	70	72	40	56	57	61.579	-0.494666	0.247239	-2.00076	0.0454183	NA
ENSMUSG00000042208	0610010F05Rik	ENSMUSG00000042208.15	420	430	451	482	462	545	465.009	0.195502	0.0977866	1.99927	0.045579	0.282218
ENSMUSG00000037754	Ppp1r16b	ENSMUSG00000037754.13	1823	1921	1784	1737	1705	1684	1775.6	-0.110345	0.0551984	-1.99906	0.0456021	0.282218
ENSMUSG00000039728	Slc6a5	ENSMUSG00000039728.15	802	710	550	614	491	452	603.25	-0.405966	0.203088	-1.99897	0.0456121	0.282218
ENSMUSG00000054452	Aes	ENSMUSG00000054452.10	3186	3453	3263	3612	3662	3353	3421.41	0.101046	0.0505517	1.99886	0.0456234	0.282218
ENSMUSG00000046598	Bdh1	ENSMUSG00000046598.15	498	451	522	551	544	572	522.903	0.181916	0.0910463	1.99806	0.0457105	0.282286
ENSMUSG00000026819	Slc25a25	ENSMUSG00000026819.15	721	779	729	625	666	702	703.515	-0.160642	0.080403	-1.99795	0.0457217	0.282286
ENSMUSG00000040938	Slc16a11	ENSMUSG00000040938.16	168	148	186	239	199	184	187.293	0.305743	0.15305	1.99767	0.0457527	NA
ENSMUSG00000021374	Nup153	ENSMUSG00000021374.10	624	550	533	490	521	490	534.789	-0.183873	0.0920505	-1.99753	0.0457681	0.282302
ENSMUSG00000072571	Tmem253	ENSMUSG00000072571.3	16	34	21	10	12	14	17.791	-0.951585	0.476661	-1.99635	0.0458954	NA
ENSMUSG00000000823	Zfp512b	ENSMUSG00000000823.16	367	384	384	483	389	443	408.293	0.209189	0.104825	1.9956	0.0459771	0.282756
ENSMUSG00000054770	Kctd18	ENSMUSG00000054770.16	122	130	148	178	156	166	149.964	0.319715	0.16022	1.99548	0.0459904	NA
ENSMUSG00000038255	Neurod2	ENSMUSG00000038255.6	607	665	627	723	757	656	672.594	0.167677	0.0840299	1.99544	0.0459944	0.282756
ENSMUSG00000025781	Atp5c1	ENSMUSG00000025781.14	1572	1693	1696	1830	1777	1761	1721.55	0.112509	0.0563869	1.99529	0.0460107	0.282756
ENSMUSG00000024426	Atat1	ENSMUSG00000024426.17	378	389	386	350	310	339	358.591	-0.209351	0.104925	-1.99524	0.0460168	0.282756
ENSMUSG00000071658	Gng3	ENSMUSG00000071658.4	1363	1465	1338	1502	1523	1502	1448.66	0.119315	0.0598285	1.99429	0.0461208	0.283126
ENSMUSG00000028138	Adh5	ENSMUSG00000028138.8	417	419	426	478	489	469	449.776	0.185213	0.0928918	1.99386	0.0461674	0.283142
ENSMUSG00000044533	Rps2	ENSMUSG00000044533.15	2297	2238	2511	2628	2591	2407	2445.29	0.113478	0.0569603	1.99223	0.0463459	0.283968
ENSMUSG00000097861	Gm26858	ENSMUSG00000097861.1	29	33	28	17	19	16	23.7934	-0.776418	0.390053	-1.99055	0.0465308	NA
ENSMUSG00000050064	Zfp697	ENSMUSG00000050064.14	184	205	208	171	140	175	180.448	-0.297692	0.149563	-1.99041	0.0465456	NA
ENSMUSG00000029810	Tmem176b	ENSMUSG00000029810.15	237	224	237	222	184	174	213.026	-0.275492	0.138522	-1.9888	0.0467228	NA
ENSMUSG00000053289	Ddx10	ENSMUSG00000053289.8	174	183	187	197	214	248	200.514	0.28203	0.141809	1.9888	0.0467234	NA
ENSMUSG00000069237	Fam8a1	ENSMUSG00000069237.8	1205	1206	1143	1031	1116	1098	1133.29	-0.129775	0.0652748	-1.98814	0.0467959	0.285837
ENSMUSG00000024109	Nrxn1	ENSMUSG00000024109.18	4068	4094	4146	3837	3939	3846	3988.25	-0.0825385	0.041523	-1.98778	0.0468361	0.285837
ENSMUSG00000019494	Cops6	ENSMUSG00000019494.14	1006	1012	973	1045	1187	1061	1047.46	0.139794	0.070337	1.98749	0.0468677	0.285837
ENSMUSG00000025207	Sema4g	ENSMUSG00000025207.15	360	359	394	458	417	407	399.122	0.202773	0.102062	1.98677	0.0469476	0.285837
ENSMUSG00000041096	Tspyl2	ENSMUSG00000041096.13	1093	954	1020	958	845	957	971.214	-0.152028	0.0765277	-1.98658	0.0469691	0.285837
ENSMUSG00000017831	Rab5a	ENSMUSG00000017831.7	1000	993	1115	1141	1161	1113	1087.05	0.136339	0.0686304	1.98658	0.0469695	0.285837
ENSMUSG00000021792	Fam213a	ENSMUSG00000021792.15	1088	1007	1065	1106	1223	1136	1103.94	0.134852	0.0678869	1.98643	0.0469858	0.285837
ENSMUSG00000020271	Fbxw11	ENSMUSG00000020271.17	1637	1641	1656	1506	1586	1470	1582.52	-0.113272	0.0570298	-1.98619	0.0470121	0.285837
ENSMUSG00000022518	4930562C15Rik	ENSMUSG00000022518.16	8	10	9	5	3	2	6.1601	-1.60961	0.810511	-1.98592	0.0470419	NA
ENSMUSG00000062729	Ppox	ENSMUSG00000062729.11	258	264	266	336	318	277	286.498	0.237282	0.119507	1.98551	0.0470875	NA
ENSMUSG00000029673	Auts2	ENSMUSG00000029673.17	742	854	697	692	620	716	719.974	-0.178497	0.0899051	-1.98539	0.0471014	0.285837
ENSMUSG00000068099	1500009C09Rik	ENSMUSG00000068099.4	865	884	867	951	980	943	915.033	0.136005	0.0685107	1.98516	0.0471267	0.285837
ENSMUSG00000025316	Banp	ENSMUSG00000025316.16	242	295	265	201	241	227	245.354	-0.261081	0.131536	-1.98486	0.0471602	NA
ENSMUSG00000032012	Nectin1	ENSMUSG00000032012.8	499	628	485	469	406	508	499.09	-0.22228	0.112019	-1.9843	0.0472222	0.285837
ENSMUSG00000099681	1700052K11Rik	ENSMUSG00000099681.1	59	59	78	80	108	81	77.4071	0.459496	0.23158	1.98418	0.0472358	NA
ENSMUSG00000006651	Aplp1	ENSMUSG00000006651.8	10047	10541	9493	9965	9131	9097	9712.23	-0.0940881	0.0474237	-1.98399	0.0472573	0.285837
ENSMUSG00000004897	Hdgf	ENSMUSG00000004897.16	1330	1333	1340	1477	1476	1391	1391.15	0.117354	0.0591506	1.98399	0.0472574	0.285837
ENSMUSG00000032009	Sesn3	ENSMUSG00000032009.8	2092	2129	2001	1883	1836	2034	1995.69	-0.112406	0.0566602	-1.98387	0.0472706	0.285837
ENSMUSG00000097553	4930455D15Rik	ENSMUSG00000097553.1	15	7	4	0	3	4	5.28562	-1.89655	0.956221	-1.98338	0.0473251	NA
ENSMUSG00000048240	Gng7	ENSMUSG00000048240.14	1458	1551	1517	1694	1538	1690	1574.55	0.119965	0.0605151	1.98239	0.0474351	0.286511
ENSMUSG00000021670	Hmgcr	ENSMUSG00000021670.14	1148	1209	1209	1007	1112	1128	1135.4	-0.133483	0.0673529	-1.98184	0.0474966	0.286511
ENSMUSG00000021501	Caml	ENSMUSG00000021501.4	278	255	294	342	318	310	299.4	0.229198	0.115658	1.9817	0.047513	NA
ENSMUSG00000039262	Prrc2b	ENSMUSG00000039262.16	5620	5622	5275	5108	5171	5302	5349.75	-0.0839096	0.0423427	-1.98168	0.0475153	0.286511
ENSMUSG00000030124	Lag3	ENSMUSG00000030124.2	43	37	27	25	14	25	28.6087	-0.747146	0.377058	-1.98151	0.0475338	NA
ENSMUSG00000090364	Gm3043	ENSMUSG00000090364.1	0	0	1	1	11	0	2.24553	3.55452	1.79395	1.98139	0.0475474	NA
ENSMUSG00000087177	E130307A14Rik	ENSMUSG00000087177.7	210	181	166	222	216	236	205.002	0.278094	0.140468	1.97977	0.047729	NA
ENSMUSG00000042529	Kcnj12	ENSMUSG00000042529.14	260	261	262	223	216	222	240.732	-0.245038	0.123774	-1.97972	0.0477349	NA
ENSMUSG00000022209	Dhrs2	ENSMUSG00000022209.12	0	0	0	1	2	5	1.26926	3.80904	1.92416	1.97959	0.0477499	NA
ENSMUSG00000001763	Tspan33	ENSMUSG00000001763.14	210	262	226	283	245	312	256.288	0.265993	0.134377	1.97945	0.0477655	NA
ENSMUSG00000023960	Enpp5	ENSMUSG00000023960.13	2784	2773	2856	2652	2626	2620	2718.51	-0.0913703	0.0461643	-1.97924	0.0477889	0.287709
ENSMUSG00000023175	Bsg	ENSMUSG00000023175.15	3872	3869	3719	3794	3405	3521	3696.59	-0.0971025	0.0490636	-1.97912	0.0478031	0.287709
ENSMUSG00000028575	Eqtn	ENSMUSG00000028575.11	2	14	2	15	14	17	10.7695	1.3392	0.676859	1.97855	0.0478666	NA
ENSMUSG00000075486	Commd6	ENSMUSG00000075486.10	245	290	279	343	339	284	296.761	0.24217	0.122398	1.97855	0.0478668	NA
ENSMUSG00000030682	Cdipt	ENSMUSG00000030682.4	1088	1174	1082	1035	999	1020	1066.34	-0.131848	0.0666554	-1.97806	0.0479219	0.288156
ENSMUSG00000021376	Tpmt	ENSMUSG00000021376.11	76	74	90	122	100	96	92.9975	0.405714	0.205147	1.97767	0.0479655	NA
ENSMUSG00000026628	Atf3	ENSMUSG00000026628.13	18	18	11	5	9	6	11.1728	-1.17324	0.593285	-1.97753	0.0479817	NA
ENSMUSG00000032376	Usp3	ENSMUSG00000032376.12	337	286	314	358	377	352	337.271	0.217781	0.110129	1.9775	0.0479853	NA
ENSMUSG00000071533	Pcnp	ENSMUSG00000071533.11	1283	1181	1271	1379	1459	1262	1305.73	0.134896	0.0682278	1.97714	0.0480261	0.288514
ENSMUSG00000050600	Zfp831	ENSMUSG00000050600.5	218	254	203	169	196	190	205.084	-0.281818	0.142551	-1.97696	0.0480464	NA
ENSMUSG00000024785	Rcl1	ENSMUSG00000024785.6	143	113	126	154	165	157	142.825	0.324618	0.164229	1.97662	0.0480848	NA
ENSMUSG00000029651	Mtus2	ENSMUSG00000029651.16	537	578	545	488	489	495	522.173	-0.173387	0.0877328	-1.97631	0.0481201	0.288612
ENSMUSG00000021303	Gng4	ENSMUSG00000021303.14	523	481	460	514	631	531	523.435	0.195628	0.0989921	1.9762	0.0481318	0.288612
ENSMUSG00000045903	Npas4	ENSMUSG00000045903.8	130	138	146	99	106	120	123.072	-0.345616	0.174916	-1.9759	0.0481664	NA
ENSMUSG00000073758	Sh3d21	ENSMUSG00000073758.10	10	6	10	22	18	15	13.4371	1.06151	0.537356	1.97543	0.0482195	NA
ENSMUSG00000078838	Gm17382	ENSMUSG00000078838.2	6	11	5	3	1	2	4.78877	-1.89563	0.959918	-1.97478	0.048293	NA
ENSMUSG00000037679	Inf2	ENSMUSG00000037679.9	1089	1152	999	1009	916	1007	1028.7	-0.145337	0.0735984	-1.97474	0.048298	0.288667
ENSMUSG00000030062	Rpn1	ENSMUSG00000030062.7	984	1111	1095	963	967	970	1014.99	-0.13797	0.0698785	-1.97443	0.0483327	0.288667
ENSMUSG00000024208	Uqcc2	ENSMUSG00000024208.15	453	548	561	636	595	556	558.196	0.191619	0.0970575	1.97428	0.0483495	0.288667
ENSMUSG00000032298	Neil1	ENSMUSG00000032298.13	67	55	52	74	78	87	68.9058	0.460491	0.233253	1.97421	0.0483579	NA
ENSMUSG00000034157	Cipc	ENSMUSG00000034157.12	991	989	1015	902	917	913	954.665	-0.13231	0.0670325	-1.97382	0.0484023	0.288667
ENSMUSG00000078137	Ankrd63	ENSMUSG00000078137.1	310	359	366	277	282	323	319.654	-0.230678	0.116882	-1.97359	0.0484283	NA
ENSMUSG00000059447	Hadhb	ENSMUSG00000059447.13	520	506	529	585	590	571	550.225	0.167943	0.0850995	1.97349	0.0484403	0.288667
ENSMUSG00000045671	Spred2	ENSMUSG00000045671.17	1031	1159	1055	975	989	989	1032.82	-0.136475	0.0691572	-1.97341	0.048449	0.288667
ENSMUSG00000025931	Paqr8	ENSMUSG00000025931.15	2013	1985	1941	1868	1850	1814	1911.73	-0.102795	0.0520914	-1.97337	0.0484539	0.288667
ENSMUSG00000008450	Nutf2	ENSMUSG00000008450.8	220	222	208	187	200	145	196.921	-0.293321	0.148721	-1.97229	0.0485767	NA
ENSMUSG00000092655	Gm25238	ENSMUSG00000092655.1	79	91	72	55	66	55	69.7735	-0.458537	0.232597	-1.97138	0.0486808	NA
ENSMUSG00000022557	Bop1	ENSMUSG00000022557.11	451	457	439	430	347	397	420.207	-0.202731	0.10288	-1.97056	0.0487746	0.29031
ENSMUSG00000002812	Flii	ENSMUSG00000002812.4	726	685	631	641	527	633	640.463	-0.182196	0.0924911	-1.96988	0.0488526	0.290506
ENSMUSG00000114438	Gm47827	ENSMUSG00000114438.1	8	9	2	3	1	0	4.02031	-2.25199	1.14345	-1.96946	0.0488998	NA
ENSMUSG00000067199	Frat1	ENSMUSG00000067199.4	116	98	103	125	134	144	119.834	0.349323	0.177405	1.96907	0.0489453	NA
ENSMUSG00000092086	Gm6793	ENSMUSG00000092086.1	60	82	48	42	49	39	53.323	-0.550619	0.279742	-1.96831	0.0490326	NA
ENSMUSG00000031981	Capn9	ENSMUSG00000031981.7	0	0	2	8	4	3	2.76829	2.85477	1.45176	1.96642	0.0492502	NA
ENSMUSG00000037979	Ccdc92	ENSMUSG00000037979.13	880	944	809	783	771	816	833.992	-0.152316	0.0774596	-1.96639	0.0492536	0.292449
ENSMUSG00000085080	2310044K18Rik	ENSMUSG00000085080.1	35	41	22	18	19	20	25.8617	-0.766557	0.389838	-1.96635	0.0492582	NA
ENSMUSG00000021219	Rgs6	ENSMUSG00000021219.16	562	549	568	423	544	499	524.01	-0.191998	0.0976466	-1.96625	0.0492698	0.292449
ENSMUSG00000008090	Fgfrl1	ENSMUSG00000008090.14	115	132	121	177	157	133	139.176	0.335603	0.170702	1.96602	0.0492965	NA
ENSMUSG00000031536	Polb	ENSMUSG00000031536.6	383	341	389	440	434	405	398.625	0.200887	0.102224	1.96517	0.0493951	0.292844
ENSMUSG00000024131	Slc3a1	ENSMUSG00000024131.7	1315	1263	1251	1139	1064	1271	1217.12	-0.139383	0.0709369	-1.96489	0.049427	0.292844
ENSMUSG00000003929	Zfp81	ENSMUSG00000003929.10	230	220	246	282	262	279	253.121	0.241915	0.123139	1.96457	0.0494645	NA
ENSMUSG00000028960	Ube4b	ENSMUSG00000028960.18	1387	1349	1333	1283	1232	1236	1303.41	-0.117978	0.0600732	-1.9639	0.0495418	0.293049
ENSMUSG00000032648	Pygm	ENSMUSG00000032648.14	550	543	494	548	407	415	492.744	-0.216384	0.110186	-1.96381	0.0495525	0.293049
ENSMUSG00000038668	Lpar1	ENSMUSG00000038668.14	513	476	482	455	433	406	460.721	-0.185899	0.0947812	-1.96134	0.0498389	0.294473
ENSMUSG00000037465	Klf10	ENSMUSG00000037465.10	251	281	248	234	189	230	238.815	-0.261204	0.133222	-1.96067	0.0499176	NA
ENSMUSG00000024873	Cnih2	ENSMUSG00000024873.6	1245	1468	1359	1530	1471	1460	1422.18	0.129943	0.0662841	1.9604	0.0499489	0.294645
ENSMUSG00000087356	Gm13856	ENSMUSG00000087356.1	97	110	96	66	81	81	88.2198	-0.404518	0.206402	-1.95986	0.0500125	NA
ENSMUSG00000046312	AI464131	ENSMUSG00000046312.4	435	412	355	333	371	329	372.539	-0.216639	0.110563	-1.95941	0.0500646	0.294645
ENSMUSG00000087526	Gm15738	ENSMUSG00000087526.2	97	85	92	55	64	81	79.1185	-0.436719	0.222917	-1.95912	0.0500993	NA
ENSMUSG00000113662	Gm35558	ENSMUSG00000113662.1	188	186	136	129	143	133	152.507	-0.329723	0.168309	-1.95903	0.0501091	NA
ENSMUSG00000021385	Ippk	ENSMUSG00000021385.10	214	233	247	178	193	205	211.696	-0.266427	0.136013	-1.95884	0.0501321	NA
ENSMUSG00000020917	Acly	ENSMUSG00000020917.17	2593	2464	2260	2304	2180	2289	2348.16	-0.111897	0.0571273	-1.95872	0.0501452	0.294645
ENSMUSG00000071014	Ndufb6	ENSMUSG00000071014.10	527	607	623	702	700	596	625.882	0.182999	0.0934288	1.9587	0.050148	0.294645
ENSMUSG00000023456	Tpi1	ENSMUSG00000023456.15	4755	4932	5025	5165	5328	5083	5048.02	0.0821644	0.0419544	1.95842	0.0501803	0.294645
ENSMUSG00000032193	Ldlr	ENSMUSG00000032193.9	363	325	320	271	277	311	311.214	-0.225983	0.115394	-1.95836	0.0501874	NA
ENSMUSG00000046442	Ppm1e	ENSMUSG00000046442.4	2829	2633	2551	2156	2564	2599	2555.35	-0.128892	0.0658278	-1.95802	0.0502278	0.294645
ENSMUSG00000035284	Vps13c	ENSMUSG00000035284.10	1522	1421	1275	1323	1264	1255	1343.33	-0.13516	0.0690325	-1.95792	0.0502388	0.294645
ENSMUSG00000059921	Unc5c	ENSMUSG00000059921.15	604	567	552	540	474	512	541.716	-0.175914	0.0898681	-1.95747	0.0502919	0.294645
ENSMUSG00000038077	Kcna6	ENSMUSG00000038077.7	1290	1309	1193	1179	1051	1218	1206.83	-0.138109	0.0705663	-1.95715	0.0503302	0.294645
ENSMUSG00000052040	Klf13	ENSMUSG00000052040.10	1519	1562	1467	1384	1369	1444	1457.45	-0.115415	0.0589741	-1.95704	0.0503425	0.294645
ENSMUSG00000110980	Gm47204	ENSMUSG00000110980.1	81	57	71	103	99	81	81.8728	0.434291	0.221914	1.95703	0.0503443	NA
ENSMUSG00000015843	Rxrg	ENSMUSG00000015843.10	126	131	137	111	104	96	117.424	-0.346178	0.176943	-1.95644	0.0504139	NA
ENSMUSG00000033579	Fa2h	ENSMUSG00000033579.16	632	717	658	592	603	599	633.862	-0.162551	0.0830863	-1.9564	0.0504175	0.294645
ENSMUSG00000011831	Evi5	ENSMUSG00000011831.16	683	644	651	657	792	766	698.778	0.166764	0.0852616	1.95591	0.0504761	0.294645
ENSMUSG00000041879	Ipo9	ENSMUSG00000041879.13	1630	1715	1538	1488	1500	1517	1564.7	-0.116169	0.0593968	-1.95581	0.0504876	0.294645
ENSMUSG00000035530	Eif1	ENSMUSG00000035530.13	2083	2183	2112	2015	1984	1955	2055.23	-0.100326	0.0513008	-1.95565	0.0505066	0.294645
ENSMUSG00000030887	Pdzd9	ENSMUSG00000030887.4	342	364	357	423	391	407	380.673	0.19812	0.101337	1.95506	0.0505754	0.29478
ENSMUSG00000021702	Thbs4	ENSMUSG00000021702.7	43	58	64	45	33	34	46.1622	-0.572005	0.29274	-1.95397	0.0507047	NA
ENSMUSG00000045102	Poln	ENSMUSG00000045102.12	2	2	3	6	8	9	5.06422	1.75792	0.899953	1.95335	0.0507786	NA
ENSMUSG00000044715	Gskip	ENSMUSG00000044715.7	347	367	337	319	301	288	326.431	-0.214209	0.109684	-1.95297	0.050823	NA
ENSMUSG00000032313	Tmem266	ENSMUSG00000032313.11	117	140	136	166	161	161	146.905	0.311768	0.159673	1.95254	0.0508739	NA
ENSMUSG00000028176	Lrrc7	ENSMUSG00000028176.11	884	806	743	655	705	794	764.485	-0.172478	0.0883842	-1.95146	0.0510022	0.296999
ENSMUSG00000039154	Shd	ENSMUSG00000039154.7	188	169	231	261	231	224	217.434	0.281671	0.144352	1.95128	0.0510239	NA
ENSMUSG00000029145	Eif2b4	ENSMUSG00000029145.12	434	385	373	450	506	417	427.619	0.2061	0.105699	1.94987	0.0511915	0.297833
ENSMUSG00000045062	Pcdhb7	ENSMUSG00000045062.4	89	93	89	81	59	63	79.1871	-0.426833	0.218909	-1.94982	0.0511974	NA
ENSMUSG00000088108	Snora47	ENSMUSG00000088108.1	1	0	1	3	5	5	2.62042	2.77557	1.42375	1.94948	0.0512385	NA
ENSMUSG00000042476	Abcb4	ENSMUSG00000042476.12	34	41	39	53	51	62	46.6665	0.547198	0.280726	1.94922	0.0512686	NA
ENSMUSG00000062198	2700097O09Rik	ENSMUSG00000062198.5	98	78	110	133	123	114	109.182	0.373587	0.191758	1.94822	0.0513882	NA
ENSMUSG00000046994	Mars2	ENSMUSG00000046994.9	419	374	385	350	321	351	366.622	-0.204957	0.105315	-1.94613	0.0516386	0.300164
ENSMUSG00000037344	Slc12a9	ENSMUSG00000037344.14	261	279	248	227	225	214	242.634	-0.2442	0.125527	-1.94539	0.0517278	NA
ENSMUSG00000039257	Vstm2b	ENSMUSG00000039257.11	246	258	212	266	293	289	260.754	0.244034	0.125466	1.94502	0.0517723	NA
ENSMUSG00000030607	Acan	ENSMUSG00000030607.7	67	88	72	67	34	59	64.7296	-0.51778	0.266342	-1.94404	0.0518905	NA
ENSMUSG00000040128	Pnrc1	ENSMUSG00000040128.9	325	356	332	314	279	279	314.15	-0.21938	0.112876	-1.94355	0.0519499	NA
ENSMUSG00000030000	Add2	ENSMUSG00000030000.10	2718	2830	2718	2566	2569	2623	2670.61	-0.0917362	0.0472107	-1.94312	0.0520012	0.302
ENSMUSG00000026234	Ncl	ENSMUSG00000026234.12	2747	2649	2790	2429	2597	2616	2638.07	-0.0976175	0.0502699	-1.94187	0.0521532	0.30261
ENSMUSG00000103341	1700051O22Rik	ENSMUSG00000103341.1	41	44	35	28	29	19	32.6699	-0.660793	0.340329	-1.94163	0.052182	NA
ENSMUSG00000018865	Sult4a1	ENSMUSG00000018865.9	4497	4784	4431	4339	4421	4125	4432.88	-0.0902738	0.0465048	-1.94117	0.0522372	0.302825
ENSMUSG00000020303	Stc2	ENSMUSG00000020303.2	29	45	40	25	24	23	31.0222	-0.67608	0.348435	-1.94033	0.0523394	NA
ENSMUSG00000038909	Kat7	ENSMUSG00000038909.16	751	799	742	693	701	674	726.772	-0.148815	0.0767134	-1.93988	0.0523942	0.303463
ENSMUSG00000097216	4932441J04Rik	ENSMUSG00000097216.3	501	545	494	423	489	441	482.129	-0.185478	0.0957173	-1.93777	0.0526517	0.304682
ENSMUSG00000047710	Champ1	ENSMUSG00000047710.8	376	388	332	335	304	307	340.252	-0.214798	0.110875	-1.9373	0.052709	0.304696
ENSMUSG00000026203	Dnajb2	ENSMUSG00000026203.16	1302	1360	1272	1237	1220	1163	1258.8	-0.12109	0.0625152	-1.93697	0.0527486	0.304696
ENSMUSG00000033033	Calhm2	ENSMUSG00000033033.10	87	89	69	59	58	64	71.0473	-0.445509	0.230024	-1.9368	0.0527704	NA
ENSMUSG00000021983	Atp8a2	ENSMUSG00000021983.16	1196	1176	1094	1027	998	1127	1103.01	-0.135893	0.0701791	-1.93637	0.0528222	0.304696
ENSMUSG00000023913	Pla2g7	ENSMUSG00000023913.17	1208	1223	1249	1484	1379	1201	1290.71	0.141288	0.0729719	1.9362	0.0528428	0.304696
ENSMUSG00000039195	1110008P14Rik	ENSMUSG00000039195.4	723	829	808	878	873	864	829.036	0.146468	0.0756904	1.93509	0.0529792	0.305209
ENSMUSG00000050668	Gpatch11	ENSMUSG00000050668.9	316	272	283	338	328	346	313.91	0.218163	0.11277	1.93458	0.0530415	NA
ENSMUSG00000031843	Mphosph6	ENSMUSG00000031843.2	91	91	104	147	124	102	109.789	0.375388	0.194072	1.93427	0.0530805	NA
ENSMUSG00000052026	Slc6a7	ENSMUSG00000052026.7	569	551	531	603	614	629	582.631	0.161668	0.0836031	1.93376	0.0531427	0.305538
ENSMUSG00000029649	Pomp	ENSMUSG00000029649.10	741	779	831	912	833	861	826.352	0.146979	0.0760119	1.93363	0.0531588	0.305538
ENSMUSG00000028035	Dnajb4	ENSMUSG00000028035.13	767	831	881	740	724	769	785.164	-0.150527	0.0778532	-1.93347	0.0531781	0.305538
ENSMUSG00000053094	Tmem248	ENSMUSG00000053094.15	510	451	459	528	511	568	504.48	0.180266	0.0933259	1.93157	0.0534125	0.306197
ENSMUSG00000019437	Tlcd1	ENSMUSG00000019437.17	1249	1230	1333	1333	1340	1488	1328.77	0.1272	0.0658641	1.93125	0.0534522	0.306197
ENSMUSG00000002608	Ccdc97	ENSMUSG00000002608.8	502	480	449	413	431	415	448.514	-0.183622	0.0951312	-1.9302	0.0535825	0.306197
ENSMUSG00000021066	Atl1	ENSMUSG00000021066.9	1253	1162	1222	1221	1350	1405	1268.89	0.130364	0.0675452	1.93003	0.0536027	0.306197
ENSMUSG00000024589	Nedd4l	ENSMUSG00000024589.16	1198	1358	1167	1150	1125	1121	1186.43	-0.134078	0.0694697	-1.93003	0.0536035	0.306197
ENSMUSG00000021737	Psmd6	ENSMUSG00000021737.4	552	535	578	619	647	598	588.231	0.163079	0.0845028	1.92986	0.0536238	0.306197
ENSMUSG00000020265	Sumo3	ENSMUSG00000020265.16	582	532	609	610	642	681	609.274	0.168126	0.0871187	1.92985	0.0536249	0.306197
ENSMUSG00000032527	Pccb	ENSMUSG00000032527.13	559	592	580	660	622	652	610.946	0.158497	0.0821481	1.92941	0.0536804	0.306244
ENSMUSG00000005681	Apoa2	ENSMUSG00000005681.12	8	9	5	12	17	20	11.8965	1.1044	0.57254	1.92895	0.0537376	NA
ENSMUSG00000053453	Thoc7	ENSMUSG00000053453.9	344	401	419	431	435	473	417.175	0.20072	0.104102	1.92812	0.0538407	0.306887
ENSMUSG00000097195	Snhg5	ENSMUSG00000097195.9	43	45	42	67	58	60	52.4677	0.505114	0.261976	1.92809	0.0538437	NA
ENSMUSG00000091803	Cox16	ENSMUSG00000091803.7	6	7	17	7	1	3	6.90836	-1.58669	0.823132	-1.92763	0.0539012	NA
ENSMUSG00000060450	Rnf14	ENSMUSG00000060450.13	3118	2896	3090	2547	2984	2881	2919.47	-0.112594	0.0584636	-1.92589	0.0541185	0.308199
ENSMUSG00000033439	Trmt13	ENSMUSG00000033439.12	83	96	89	107	108	131	102.487	0.371214	0.192792	1.92547	0.054171	NA
ENSMUSG00000080875	Gm7332	ENSMUSG00000080875.4	5	6	4	18	6	14	8.78522	1.33549	0.69411	1.92403	0.0543512	NA
ENSMUSG00000030551	Nr2f2	ENSMUSG00000030551.14	235	279	249	236	206	201	234.343	-0.254953	0.132575	-1.92309	0.0544686	NA
ENSMUSG00000075297	H60b	ENSMUSG00000075297.10	3	18	8	3	5	1	6.32948	-1.68958	0.878792	-1.92261	0.0545284	NA
ENSMUSG00000038070	Cntln	ENSMUSG00000038070.15	120	122	153	159	163	167	147.381	0.314098	0.163429	1.92192	0.0546162	NA
ENSMUSG00000029095	Ablim2	ENSMUSG00000029095.17	1171	1285	1272	1145	1009	1222	1183.89	-0.143592	0.0747142	-1.92188	0.0546208	0.310785
ENSMUSG00000062373	Tmem65	ENSMUSG00000062373.8	969	900	1013	1074	1058	1030	1007.37	0.133811	0.06965	1.92119	0.0547072	0.31085
ENSMUSG00000023572	Ccndbp1	ENSMUSG00000023572.16	588	545	591	679	655	600	609.806	0.16478	0.0857848	1.92086	0.0547497	0.31085
ENSMUSG00000049090	Zadh2	ENSMUSG00000049090.2	344	327	362	423	390	376	370.309	0.201427	0.104885	1.92046	0.0547993	0.31085
ENSMUSG00000024548	Setbp1	ENSMUSG00000024548.11	455	451	405	397	384	368	409.982	-0.192286	0.100155	-1.91987	0.0548741	0.31085
ENSMUSG00000037646	Vps13b	ENSMUSG00000037646.10	900	819	827	747	716	825	805.664	-0.152531	0.079458	-1.91965	0.0549027	0.31085
ENSMUSG00000030983	Bccip	ENSMUSG00000030983.4	348	345	410	409	451	410	395.39	0.203938	0.106245	1.9195	0.0549211	0.31085
ENSMUSG00000046058	Eid2	ENSMUSG00000046058.7	258	294	301	312	319	367	308.379	0.226968	0.118297	1.91863	0.0550311	NA
ENSMUSG00000030341	Tnfrsf1a	ENSMUSG00000030341.17	105	82	111	73	77	74	86.9337	-0.404463	0.210822	-1.91851	0.0550467	NA
ENSMUSG00000085272	Sbk3	ENSMUSG00000085272.7	8	13	23	12	5	3	10.5929	-1.27021	0.662087	-1.91849	0.0550487	NA
ENSMUSG00000020154	Ptprb	ENSMUSG00000020154.10	594	655	614	527	536	594	586.581	-0.167932	0.0875418	-1.91831	0.0550715	0.311429
ENSMUSG00000086816	Gm16726	ENSMUSG00000086816.1	134	147	137	110	102	121	125.072	-0.331517	0.172829	-1.91818	0.0550878	NA
ENSMUSG00000109917	Gm45671	ENSMUSG00000109917.1	3	7	5	0	2	1	3.07071	-2.42489	1.26434	-1.91792	0.0551218	NA
ENSMUSG00000096945	Gm26546	ENSMUSG00000096945.1	27	19	25	45	43	27	30.9946	0.69224	0.36111	1.91698	0.055241	NA
ENSMUSG00000032512	Wdr48	ENSMUSG00000032512.7	745	859	807	895	888	883	846.11	0.143837	0.0750407	1.91678	0.0552659	0.311854
ENSMUSG00000048878	Hexim1	ENSMUSG00000048878.6	684	727	764	669	630	659	688.742	-0.153559	0.0801147	-1.91674	0.0552705	0.311854
ENSMUSG00000003037	Rab8a	ENSMUSG00000003037.16	348	352	350	389	404	406	374.998	0.193214	0.100812	1.91658	0.0552916	0.311854
ENSMUSG00000039395	Mreg	ENSMUSG00000039395.8	97	89	93	133	126	102	106.682	0.365135	0.190576	1.91595	0.0553711	NA
ENSMUSG00000046667	Rbm12b1	ENSMUSG00000046667.14	103	104	120	81	72	97	96.0344	-0.387097	0.2021	-1.91538	0.0554445	NA
ENSMUSG00000032216	Nedd4	ENSMUSG00000032216.14	5331	5090	5218	4841	4852	5092	5070.49	-0.0803119	0.0419318	-1.9153	0.0554548	0.312348
ENSMUSG00000060429	Sntb1	ENSMUSG00000060429.12	101	99	85	64	69	81	83.106	-0.409165	0.213639	-1.91521	0.0554652	NA
ENSMUSG00000068742	Cry2	ENSMUSG00000068742.11	1249	1346	1147	1180	1145	1085	1192.14	-0.135402	0.0707134	-1.9148	0.0555178	0.312348
ENSMUSG00000028917	Plekhm2	ENSMUSG00000028917.14	873	879	848	968	939	943	908.398	0.131569	0.0687196	1.91458	0.0555462	0.312348
ENSMUSG00000060636	Rpl35a	ENSMUSG00000060636.14	925	961	987	1185	1037	969	1010.71	0.148157	0.077392	1.91437	0.0555727	0.312348
ENSMUSG00000097497	Gm26652	ENSMUSG00000097497.1	0	1	0	6	4	1	1.89849	3.27378	1.7103	1.91416	0.0555999	NA
ENSMUSG00000066798	Zbtb6	ENSMUSG00000066798.3	203	169	163	203	227	216	197.039	0.274135	0.143334	1.91256	0.0558042	NA
ENSMUSG00000053293	Pom121	ENSMUSG00000053293.9	743	814	733	694	617	736	722.618	-0.16295	0.0852036	-1.91248	0.055815	0.313438
ENSMUSG00000110400	Gm45416	ENSMUSG00000110400.1	0	0	2	3	7	4	2.62238	2.7879	1.45809	1.91203	0.0558723	NA
ENSMUSG00000058581	Gm5801	ENSMUSG00000058581.7	0	1	1	5	8	1	2.65923	2.8288	1.47976	1.91166	0.0559193	NA
ENSMUSG00000034910	Pygo1	ENSMUSG00000034910.5	527	551	536	650	562	604	571.606	0.167641	0.0877181	1.91114	0.0559868	0.313734
ENSMUSG00000031812	Map1lc3b	ENSMUSG00000031812.16	1896	1873	1853	1836	1703	1690	1808.47	-0.106045	0.0554896	-1.91108	0.0559938	0.313734
ENSMUSG00000030869	Ndufab1	ENSMUSG00000030869.11	554	572	675	677	699	652	637.829	0.170882	0.0894268	1.91085	0.0560232	0.313734
ENSMUSG00000005683	Cs	ENSMUSG00000005683.8	2488	2459	2304	2374	2195	2184	2333.98	-0.103821	0.0543408	-1.91055	0.0560621	0.313734
ENSMUSG00000024048	Myl12a	ENSMUSG00000024048.14	309	277	311	242	243	276	276.456	-0.231471	0.121164	-1.9104	0.0560811	NA
ENSMUSG00000026344	Lypd1	ENSMUSG00000026344.9	729	782	752	844	833	819	793.288	0.140293	0.0734617	1.90974	0.0561663	0.314028
ENSMUSG00000090667	Gm765	ENSMUSG00000090667.2	26	23	23	13	14	14	18.8661	-0.836159	0.438004	-1.90902	0.056259	NA
ENSMUSG00000079657	Rab26	ENSMUSG00000079657.10	189	167	171	194	208	232	193.377	0.272361	0.142682	1.90887	0.0562793	NA
ENSMUSG00000062202	Btbd9	ENSMUSG00000062202.13	746	657	713	635	624	640	669.144	-0.15522	0.0813157	-1.90886	0.0562805	0.314028
ENSMUSG00000022890	Atp5j	ENSMUSG00000022890.13	1675	1695	1829	1943	1840	1828	1801.78	0.109406	0.0573179	1.90875	0.0562943	0.314028
ENSMUSG00000090841	Myl6	ENSMUSG00000090841.2	1903	1931	2141	2217	2176	2064	2071.99	0.111442	0.0583883	1.90864	0.0563091	0.314028
ENSMUSG00000036264	Fstl4	ENSMUSG00000036264.9	200	186	183	149	162	157	173.012	-0.279317	0.146435	-1.90744	0.056463	NA
ENSMUSG00000104097	Gm37313	ENSMUSG00000104097.1	8	11	7	3	4	2	5.9449	-1.56745	0.822817	-1.90498	0.056782	NA
ENSMUSG00000050428	Fbxo46	ENSMUSG00000050428.7	151	160	130	128	119	105	132.184	-0.329021	0.172724	-1.9049	0.0567931	NA
ENSMUSG00000005610	Eif4g2	ENSMUSG00000005610.17	5773	5710	5929	5373	5703	5407	5649.17	-0.0787951	0.0413645	-1.9049	0.0567934	0.316433
ENSMUSG00000007038	Neu1	ENSMUSG00000007038.5	488	456	542	483	405	412	464.296	-0.195941	0.1029	-1.90418	0.0568868	0.316433
ENSMUSG00000025241	Fyco1	ENSMUSG00000025241.16	468	446	491	536	499	551	498.312	0.175101	0.0919639	1.90402	0.0569078	0.316433
ENSMUSG00000002949	Timm44	ENSMUSG00000002949.15	392	378	407	500	435	416	421.417	0.195017	0.102436	1.9038	0.0569364	0.316433
ENSMUSG00000038615	Nfe2l1	ENSMUSG00000038615.17	3577	3586	3550	3371	3416	3339	3472.89	-0.0813012	0.0427281	-1.90276	0.0570721	0.316596
ENSMUSG00000054115	Skp2	ENSMUSG00000054115.11	84	100	103	82	55	78	83.4246	-0.422193	0.221887	-1.90274	0.0570745	NA
ENSMUSG00000041815	Poldip3	ENSMUSG00000041815.14	729	676	688	670	622	587	661.876	-0.157682	0.0828804	-1.90253	0.0571023	0.316596
ENSMUSG00000028234	Rps20	ENSMUSG00000028234.6	667	739	737	799	823	756	753.408	0.149172	0.0784262	1.90207	0.0571619	0.316596
ENSMUSG00000029559	2210016L21Rik	ENSMUSG00000029559.15	846	901	804	896	941	973	893.488	0.139835	0.0735316	1.9017	0.0572103	0.316596
ENSMUSG00000025272	Tro	ENSMUSG00000025272.16	2004	1828	1821	1563	1699	1895	1801.78	-0.130261	0.0684973	-1.9017	0.0572107	0.316596
ENSMUSG00000098041	Gm26981	ENSMUSG00000098041.1	5	7	9	9	24	15	11.5317	1.13415	0.596766	1.90049	0.0573686	NA
ENSMUSG00000052837	Junb	ENSMUSG00000052837.6	575	616	582	565	482	532	558.42	-0.170524	0.0897284	-1.90045	0.0573746	0.31723
ENSMUSG00000004383	Large1	ENSMUSG00000004383.18	1127	1082	1156	1050	1006	1032	1075.43	-0.12417	0.0653936	-1.89881	0.0575895	0.317652
ENSMUSG00000090625	Gm20721	ENSMUSG00000090625.1	11362	11405	10698	10757	10599	10483	10884	-0.0720483	0.0379462	-1.89869	0.0576049	0.317652
ENSMUSG00000022387	Brd1	ENSMUSG00000022387.17	618	585	609	527	545	549	572.064	-0.159548	0.0840487	-1.89828	0.0576592	0.317652
ENSMUSG00000016349	Eef1a2	ENSMUSG00000016349.10	8913	9202	8487	8753	8066	8307	8621.25	-0.0828483	0.0436485	-1.89808	0.0576856	0.317652
ENSMUSG00000037104	Socs5	ENSMUSG00000037104.8	1062	1115	1145	1010	1013	1023	1061.36	-0.124555	0.0656279	-1.8979	0.0577092	0.317652
ENSMUSG00000043635	Adamts3	ENSMUSG00000043635.12	170	182	171	132	157	136	157.975	-0.294509	0.155189	-1.89774	0.0577298	NA
ENSMUSG00000051980	Casr	ENSMUSG00000051980.13	15	20	9	7	6	7	10.6878	-1.1572	0.6098	-1.89767	0.0577399	NA
ENSMUSG00000022551	Cyc1	ENSMUSG00000022551.8	1341	1257	1293	1480	1402	1344	1352.84	0.118489	0.0624406	1.89762	0.057746	0.317652
ENSMUSG00000042410	Agps	ENSMUSG00000042410.16	479	519	502	516	566	609	531.677	0.174665	0.0920836	1.89681	0.057853	0.317936
ENSMUSG00000035929	H2-Q4	ENSMUSG00000035929.11	57	79	47	51	42	33	51.5375	-0.549155	0.289544	-1.89662	0.0578775	NA
ENSMUSG00000014313	Cox6c	ENSMUSG00000014313.15	1873	1927	2084	2218	2151	1996	2041.59	0.112314	0.0592434	1.8958	0.0579859	0.317936
ENSMUSG00000032802	Srxn1	ENSMUSG00000032802.8	864	899	809	956	949	922	900.02	0.135658	0.0715585	1.89576	0.0579913	0.317936
ENSMUSG00000022403	St13	ENSMUSG00000022403.15	1780	1769	1815	1663	1705	1627	1726.54	-0.102755	0.054203	-1.89574	0.0579945	0.317936
ENSMUSG00000037493	Cib2	ENSMUSG00000037493.6	213	192	187	239	227	238	215.985	0.251305	0.132588	1.89539	0.0580407	NA
ENSMUSG00000101111	Gm28437	ENSMUSG00000101111.1	1307	1693	1456	1891	1883	1567	1632.89	0.260913	0.137674	1.89515	0.0580731	0.318097
ENSMUSG00000078700	D030028A08Rik	ENSMUSG00000078700.10	220	288	257	283	297	325	278.354	0.240918	0.127147	1.89481	0.0581181	NA
ENSMUSG00000002006	Pdzd4	ENSMUSG00000002006.12	975	1048	1002	1109	1160	1045	1056.43	0.130117	0.0686977	1.89405	0.0582188	0.318624
ENSMUSG00000029596	Sdsl	ENSMUSG00000029596.13	36	30	35	67	38	48	42.1528	0.589402	0.311223	1.89383	0.0582478	NA
ENSMUSG00000113666	Gm35725	ENSMUSG00000113666.1	1	6	5	8	17	7	7.3394	1.46296	0.772601	1.89355	0.0582849	NA
ENSMUSG00000021838	Samd4	ENSMUSG00000021838.17	670	616	624	550	559	598	602.882	-0.160012	0.0845192	-1.89321	0.0583305	0.318747
ENSMUSG00000021260	Hhipl1	ENSMUSG00000021260.8	93	92	102	115	117	133	108.691	0.349173	0.184443	1.89312	0.0583416	NA
ENSMUSG00000091712	Sec14l5	ENSMUSG00000091712.2	340	390	366	313	302	335	340.919	-0.207544	0.109639	-1.89298	0.0583612	0.318747
ENSMUSG00000020873	Slc35b1	ENSMUSG00000020873.14	307	273	280	323	339	333	309.413	0.212464	0.112246	1.89284	0.0583795	NA
ENSMUSG00000026519	Tmem63a	ENSMUSG00000026519.16	496	524	449	472	417	403	460.239	-0.190427	0.100608	-1.89276	0.0583892	0.318747
ENSMUSG00000026930	Gpsm1	ENSMUSG00000026930.15	649	662	624	673	730	745	680.58	0.151661	0.0801456	1.89231	0.0584491	0.318804
ENSMUSG00000069917	Hba-a2	ENSMUSG00000069917.7	28	86	65	33	36	46	49.0683	-0.641408	0.338972	-1.89221	0.0584627	NA
ENSMUSG00000073437	D330041H03Rik	ENSMUSG00000073437.10	249	262	218	229	167	210	222.248	-0.272515	0.144046	-1.89187	0.0585089	NA
ENSMUSG00000024841	Eif1ad	ENSMUSG00000024841.7	230	228	203	252	275	253	240.24	0.240626	0.127192	1.89184	0.0585129	NA
ENSMUSG00000030084	Plxna1	ENSMUSG00000030084.11	1223	1262	1164	1055	1087	1191	1163.82	-0.129084	0.0682432	-1.89153	0.0585537	0.319028
ENSMUSG00000046447	Camk2n1	ENSMUSG00000046447.3	12234	13919	13589	13833	14599	13832	13667.6	0.0886979	0.0468987	1.89127	0.058589	0.319028
ENSMUSG00000059049	Frem1	ENSMUSG00000059049.14	67	45	56	60	75	98	66.9179	0.484638	0.256381	1.8903	0.0587174	NA
ENSMUSG00000026977	March7	ENSMUSG00000026977.17	642	623	666	707	741	693	678.48	0.149452	0.0791198	1.88893	0.0589015	0.320367
ENSMUSG00000033152	Podxl2	ENSMUSG00000033152.13	1546	1529	1507	1669	1629	1630	1584.94	0.10435	0.0552503	1.88868	0.0589341	0.320367
ENSMUSG00000102428	Pcdhga12	ENSMUSG00000102428.1	167	140	136	110	127	115	132.409	-0.324068	0.171588	-1.88864	0.0589398	NA
ENSMUSG00000032556	Bfsp2	ENSMUSG00000032556.11	63	78	76	57	47	55	62.6983	-0.460411	0.243833	-1.88822	0.0589961	NA
ENSMUSG00000027981	Rnpc3	ENSMUSG00000027981.14	263	256	255	313	290	299	279.542	0.219109	0.116087	1.88745	0.0590992	NA
ENSMUSG00000085682	Gm14267	ENSMUSG00000085682.2	3	2	2	0	0	0	1.16999	-3.66783	1.94327	-1.88745	0.0591003	NA
ENSMUSG00000021448	Shc3	ENSMUSG00000021448.7	620	584	512	499	537	478	538.234	-0.180038	0.0953907	-1.88738	0.0591094	0.32086
ENSMUSG00000081272	Gm13509	ENSMUSG00000081272.1	574	643	637	611	558	461	580.644	-0.18969	0.10051	-1.88727	0.0591241	0.32086
ENSMUSG00000029152	Ociad1	ENSMUSG00000029152.13	2791	2760	2838	2595	2670	2629	2713.84	-0.0874907	0.0463746	-1.88661	0.059213	0.321032
ENSMUSG00000061689	Dlgap4	ENSMUSG00000061689.15	2180	2209	1958	1940	1882	2049	2036.25	-0.112483	0.0596317	-1.8863	0.0592552	0.321032
ENSMUSG00000020014	Cfap54	ENSMUSG00000020014.17	38	66	51	79	61	80	62.4273	0.492338	0.261036	1.88609	0.0592829	NA
ENSMUSG00000026179	Pnkd	ENSMUSG00000026179.14	1911	1987	1815	1813	1744	1758	1837.99	-0.105209	0.055797	-1.88557	0.0593524	0.321289
ENSMUSG00000057604	Lmcd1	ENSMUSG00000057604.9	41	52	63	28	30	46	43.3382	-0.58575	0.310662	-1.88549	0.0593639	NA
ENSMUSG00000010307	Tmem86a	ENSMUSG00000010307.7	92	102	128	174	139	108	123.891	0.377175	0.200076	1.88516	0.0594088	NA
ENSMUSG00000078851	Hist3h2a	ENSMUSG00000078851.4	120	115	115	83	87	102	103.363	-0.357131	0.189484	-1.88476	0.0594629	NA
ENSMUSG00000040363	Bcor	ENSMUSG00000040363.15	328	414	333	261	302	346	330.673	-0.240867	0.127809	-1.88458	0.0594864	NA
ENSMUSG00000022748	Cmss1	ENSMUSG00000022748.8	74	75	96	97	103	120	94.1736	0.385037	0.20431	1.88458	0.0594871	NA
ENSMUSG00000103540	Gm37668	ENSMUSG00000103540.1	1	1	1	7	3	5	3.03873	2.34503	1.24456	1.88422	0.0595347	NA
ENSMUSG00000029629	Phf14	ENSMUSG00000029629.17	567	564	572	559	683	672	602.824	0.17066	0.0906642	1.88233	0.0597912	0.323393
ENSMUSG00000035325	Sec31a	ENSMUSG00000035325.16	908	938	871	836	806	835	865.563	-0.134265	0.071354	-1.88168	0.0598798	0.323479
ENSMUSG00000038861	Pi4kb	ENSMUSG00000038861.14	483	502	459	415	467	386	451.877	-0.18837	0.100118	-1.88147	0.059908	0.323479
ENSMUSG00000103164	Gm38150	ENSMUSG00000103164.1	2	2	3	0	0	0	1.16272	-3.6609	1.9458	-1.88144	0.0599118	NA
ENSMUSG00000015143	Actn1	ENSMUSG00000015143.15	646	689	634	562	575	626	622.162	-0.158587	0.084305	-1.88111	0.0599574	0.323479
ENSMUSG00000020817	Rabep1	ENSMUSG00000020817.16	1393	1356	1435	1423	1565	1536	1451.25	0.114609	0.0609574	1.88014	0.060089	0.323917
ENSMUSG00000070960	Gm19680	ENSMUSG00000070960.4	8	7	12	3	4	3	6.31429	-1.48539	0.790442	-1.87919	0.0602182	NA
ENSMUSG00000034789	Rab24	ENSMUSG00000034789.8	405	387	407	447	484	431	426.826	0.183583	0.0977179	1.87871	0.0602846	0.323917
ENSMUSG00000060988	Galnt13	ENSMUSG00000060988.12	533	512	600	619	634	594	581.927	0.166638	0.0887002	1.87866	0.0602907	0.323917
ENSMUSG00000039959	Hip1	ENSMUSG00000039959.13	690	694	642	584	629	608	641.183	-0.153343	0.0816267	-1.87859	0.0603002	0.323917
ENSMUSG00000021957	Tkt	ENSMUSG00000021957.7	1115	1057	892	1029	817	878	964.582	-0.172079	0.0916017	-1.87856	0.0603045	0.323917
ENSMUSG00000097156	Gm3764	ENSMUSG00000097156.7	601	575	589	730	599	655	624.727	0.166197	0.0884824	1.8783	0.0603395	0.323917
ENSMUSG00000108832	Gm44832	ENSMUSG00000108832.1	781	793	680	722	671	626	712.223	-0.161819	0.0861836	-1.87761	0.0604341	0.324156
ENSMUSG00000111873	Gm39463	ENSMUSG00000111873.1	4	1	2	0	0	0	1.1896	-3.68698	1.96407	-1.87721	0.0604891	NA
ENSMUSG00000048895	Cdk5r1	ENSMUSG00000048895.13	2666	2787	2717	2554	2596	2535	2642.73	-0.0886825	0.0472453	-1.87707	0.0605091	0.324288
ENSMUSG00000092724	Gm25677	ENSMUSG00000092724.1	6	2	5	0	1	1	2.50674	-2.74944	1.46494	-1.87683	0.0605416	NA
ENSMUSG00000083626	Gm4459	ENSMUSG00000083626.1	37	26	50	64	63	42	46.9701	0.577379	0.30774	1.87619	0.0606295	NA
ENSMUSG00000031534	Smim19	ENSMUSG00000031534.15	226	226	222	263	277	252	244.347	0.232714	0.124052	1.87594	0.0606631	NA
ENSMUSG00000031328	Flna	ENSMUSG00000031328.15	822	778	820	762	666	757	767.461	-0.14867	0.0792533	-1.87589	0.0606706	0.324675
ENSMUSG00000059456	Ptk2b	ENSMUSG00000059456.13	2497	2903	2686	2552	2425	2536	2599.8	-0.107232	0.057166	-1.87581	0.0606817	0.324675
ENSMUSG00000027857	Tshb	ENSMUSG00000027857.10	14	17	14	24	14	43	20.9786	0.87438	0.466145	1.87577	0.060687	NA
ENSMUSG00000037369	Kdm6a	ENSMUSG00000037369.17	337	309	312	373	371	355	342.833	0.199494	0.106437	1.8743	0.0608892	0.325515
ENSMUSG00000039089	L3mbtl3	ENSMUSG00000039089.15	278	318	252	212	257	244	260.338	-0.24538	0.130968	-1.8736	0.0609862	NA
ENSMUSG00000049086	Bmyc	ENSMUSG00000049086.8	330	391	365	440	400	408	389.045	0.19625	0.104778	1.87302	0.0610663	0.326192
ENSMUSG00000028886	Eya3	ENSMUSG00000028886.15	318	348	332	264	288	307	309.556	-0.213194	0.113871	-1.87223	0.0611742	NA
ENSMUSG00000029219	Slc10a4	ENSMUSG00000029219.10	74	90	65	58	57	55	66.5598	-0.447289	0.238968	-1.87175	0.0612415	NA
ENSMUSG00000110275	Gm5905	ENSMUSG00000110275.1	1	6	6	16	9	8	7.74959	1.39065	0.743164	1.87126	0.0613088	NA
ENSMUSG00000114568	Gm48732	ENSMUSG00000114568.1	5	4	4	1	0	1	2.51013	-2.68994	1.4375	-1.87125	0.0613099	NA
ENSMUSG00000030321	Efcab12	ENSMUSG00000030321.15	40	40	34	38	62	66	46.7162	0.552744	0.295404	1.87115	0.0613248	NA
ENSMUSG00000031543	Ank1	ENSMUSG00000031543.18	2158	1967	1797	1903	1782	1757	1893.95	-0.12264	0.0655472	-1.87102	0.061342	0.327394
ENSMUSG00000098498	Mir8099-1	ENSMUSG00000098498.1	14	10	13	27	23	18	17.4058	0.866248	0.46299	1.87099	0.061347	NA
ENSMUSG00000078651	Aoc2	ENSMUSG00000078651.8	53	35	38	29	25	28	34.9625	-0.618117	0.330466	-1.87044	0.0614223	NA
ENSMUSG00000023232	Serinc2	ENSMUSG00000023232.17	100	93	112	81	73	81	89.7189	-0.379993	0.203168	-1.87034	0.0614368	NA
ENSMUSG00000102437	Gm38048	ENSMUSG00000102437.1	20	14	11	7	7	7	10.9676	-1.10522	0.591048	-1.86993	0.0614933	NA
ENSMUSG00000047797	Gjb1	ENSMUSG00000047797.14	301	292	246	261	223	228	258.669	-0.241182	0.128999	-1.86964	0.0615333	NA
ENSMUSG00000002496	Tsc2	ENSMUSG00000002496.10	1108	1124	1117	1084	927	1047	1067.74	-0.132757	0.0710366	-1.86885	0.0616437	0.328694
ENSMUSG00000071379	Hpcal1	ENSMUSG00000071379.2	723	741	764	767	616	603	702.237	-0.170716	0.0913634	-1.86854	0.0616873	0.328694
ENSMUSG00000025917	Cops5	ENSMUSG00000025917.9	608	552	609	642	692	638	623.608	0.157421	0.084313	1.86711	0.0618867	0.328781
ENSMUSG00000054640	Slc8a1	ENSMUSG00000054640.14	674	553	551	485	506	568	556.341	-0.186275	0.099773	-1.86699	0.0619026	0.328781
ENSMUSG00000059824	Dbp	ENSMUSG00000059824.12	334	400	407	454	423	431	408.054	0.195468	0.104698	1.86696	0.0619069	0.328781
ENSMUSG00000044288	Cnr1	ENSMUSG00000044288.6	1920	1918	1949	2082	2074	2026	1994.72	0.09511	0.0509511	1.86669	0.0619446	0.328781
ENSMUSG00000025371	Chmp6	ENSMUSG00000025371.12	199	175	191	216	248	211	206.774	0.258643	0.138558	1.86667	0.061947	NA
ENSMUSG00000025417	Pip4k2c	ENSMUSG00000025417.8	1182	1270	1125	1048	1132	1093	1141.93	-0.12732	0.0682267	-1.86613	0.062023	0.328781
ENSMUSG00000114376	Gm18807	ENSMUSG00000114376.1	21	26	22	33	40	36	29.6569	0.652556	0.349712	1.86598	0.0620437	NA
ENSMUSG00000084880	Tomm6os	ENSMUSG00000084880.1	520	527	559	624	607	567	567.391	0.161134	0.0863583	1.86587	0.0620592	0.328781
ENSMUSG00000032336	Nptn	ENSMUSG00000032336.17	4372	4732	4869	4450	4399	4302	4520.56	-0.0879361	0.0471289	-1.86587	0.0620601	0.328781
ENSMUSG00000023904	Hcfc1r1	ENSMUSG00000023904.10	364	391	420	442	453	441	418.529	0.184349	0.0988753	1.86446	0.0622564	0.329551
ENSMUSG00000024793	Tnfrsf25	ENSMUSG00000024793.14	49	36	33	22	25	29	32.4214	-0.640425	0.343501	-1.8644	0.0622651	NA
ENSMUSG00000042035	Igsf3	ENSMUSG00000042035.11	287	303	221	234	211	234	248.514	-0.256702	0.137701	-1.8642	0.0622936	NA
ENSMUSG00000047246	Hist1h2be	ENSMUSG00000047246.7	58	63	35	32	33	39	43.4801	-0.575682	0.308859	-1.8639	0.0623361	NA
ENSMUSG00000023495	Pcbp4	ENSMUSG00000023495.13	1118	1131	1179	1336	1278	1141	1197.24	0.129788	0.0696513	1.86339	0.0624069	0.330077
ENSMUSG00000066440	Zfyve26	ENSMUSG00000066440.5	277	288	299	236	242	261	266.984	-0.223252	0.119815	-1.8633	0.0624197	NA
ENSMUSG00000104253	Gm37174	ENSMUSG00000104253.1	6	11	7	15	15	20	12.4555	1.03066	0.553216	1.86302	0.0624589	NA
ENSMUSG00000114266	Gm10403	ENSMUSG00000114266.1	5	5	5	0	2	1	2.9547	-2.35189	1.26439	-1.86009	0.0628728	NA
ENSMUSG00000110376	Gm45688	ENSMUSG00000110376.1	0	0	0	0	4	4	1.23855	3.77946	2.03208	1.8599	0.0628996	NA
ENSMUSG00000062867	Impdh2	ENSMUSG00000062867.13	260	244	236	208	229	187	227.332	-0.24764	0.133171	-1.85957	0.0629462	NA
ENSMUSG00000034675	Dbn1	ENSMUSG00000034675.17	1481	1541	1459	1381	1364	1412	1439.7	-0.108443	0.0583176	-1.85952	0.062953	0.332589
ENSMUSG00000021366	Hivep1	ENSMUSG00000021366.8	852	999	852	766	840	830	856.506	-0.15026	0.0808176	-1.85925	0.0629918	0.332589
ENSMUSG00000055691	Gja6	ENSMUSG00000055691.5	3	3	1	0	0	0	1.15766	-3.65575	1.96665	-1.85887	0.0630456	NA
ENSMUSG00000111539	Gm48372	ENSMUSG00000111539.1	3	3	1	0	0	0	1.15766	-3.65575	1.96665	-1.85887	0.0630456	NA
ENSMUSG00000104548	Gm43857	ENSMUSG00000104548.1	522	480	525	484	401	462	478.892	-0.182681	0.0982763	-1.85885	0.0630486	0.332589
ENSMUSG00000085289	Gm15337	ENSMUSG00000085289.1	78	90	97	67	54	77	77.0068	-0.421487	0.226755	-1.85878	0.0630587	NA
ENSMUSG00000084866	A930006K02Rik	ENSMUSG00000084866.2	13	3	12	3	4	2	6.08497	-1.59982	0.860741	-1.85865	0.0630767	NA
ENSMUSG00000078653	Cntd1	ENSMUSG00000078653.4	463	439	517	520	533	545	502.599	0.173706	0.093462	1.85857	0.0630878	0.332589
ENSMUSG00000035007	Rundc1	ENSMUSG00000035007.5	478	492	504	441	422	446	463.797	-0.171348	0.0922144	-1.85814	0.0631485	0.332637
ENSMUSG00000047675	Rps8	ENSMUSG00000047675.15	1502	1408	1606	1628	1703	1567	1569.15	0.117481	0.0632603	1.8571	0.0632965	0.333145
ENSMUSG00000087598	Zfp111	ENSMUSG00000087598.9	134	130	115	96	103	102	113.237	-0.335534	0.180685	-1.85701	0.0633095	NA
ENSMUSG00000071724	Smpd5	ENSMUSG00000071724.5	16	12	4	15	21	27	15.6918	0.977611	0.526608	1.85643	0.0633923	NA
ENSMUSG00000079259	Trim71	ENSMUSG00000079259.2	19	11	17	3	12	5	11.3928	-1.12703	0.607191	-1.85614	0.0634332	NA
ENSMUSG00000052296	Ppp6r1	ENSMUSG00000052296.7	1228	1330	1247	1372	1374	1372	1320.3	0.113123	0.0609523	1.85592	0.0634651	0.333422
ENSMUSG00000021007	Spata7	ENSMUSG00000021007.14	149	149	128	165	179	175	157.442	0.287496	0.154952	1.8554	0.0635397	NA
ENSMUSG00000066900	Suds3	ENSMUSG00000066900.11	919	959	993	1053	1049	1029	1000.53	0.124683	0.0672035	1.8553	0.0635528	0.333422
ENSMUSG00000021198	Unc79	ENSMUSG00000021198.16	628	663	563	559	525	570	584.739	-0.165818	0.0894003	-1.85478	0.0636275	0.333422
ENSMUSG00000108584	Gm45216	ENSMUSG00000108584.1	7	7	7	3	1	2	4.52261	-1.78279	0.961192	-1.85477	0.063629	NA
ENSMUSG00000073902	Gm1966	ENSMUSG00000073902.5	0	0	1	7	4	0	1.95076	3.30238	1.78083	1.85441	0.063681	NA
ENSMUSG00000030249	Abcc9	ENSMUSG00000030249.15	121	130	104	97	84	97	105.409	-0.354129	0.190974	-1.85433	0.0636918	NA
ENSMUSG00000042532	Golga7b	ENSMUSG00000042532.14	903	941	878	1050	1010	931	951.884	0.13369	0.0721036	1.85414	0.0637196	0.333422
ENSMUSG00000097378	B230208H11Rik	ENSMUSG00000097378.8	5	3	7	0	1	2	2.97475	-2.36865	1.27766	-1.8539	0.0637532	NA
ENSMUSG00000039137	Whrn	ENSMUSG00000039137.18	604	541	544	610	624	649	595.284	0.158402	0.0854434	1.85388	0.0637561	0.333422
ENSMUSG00000113167	Gm48482	ENSMUSG00000113167.1	25	22	24	12	12	16	18.6544	-0.822125	0.443463	-1.85387	0.0637573	NA
ENSMUSG00000031654	Cbln1	ENSMUSG00000031654.16	1701	1596	1774	2538	1943	1782	1889.11	0.303712	0.163828	1.85385	0.0637611	0.333422
ENSMUSG00000057177	Gsk3a	ENSMUSG00000057177.12	1612	1653	1723	1856	1777	1735	1726	0.104618	0.0564385	1.85367	0.0637866	0.333422
ENSMUSG00000022812	Gsk3b	ENSMUSG00000022812.14	2524	2583	2479	2232	2334	2507	2443.14	-0.0996595	0.053764	-1.85365	0.0637895	0.333422
ENSMUSG00000020349	Ppp2ca	ENSMUSG00000020349.4	3498	3541	3491	3737	3763	3630	3609.93	0.0795082	0.0428981	1.85342	0.0638221	0.333422
ENSMUSG00000074067	Gm10619	ENSMUSG00000074067.9	1	4	5	0	0	1	1.78595	-3.19515	1.72419	-1.85313	0.0638639	NA
ENSMUSG00000038121	Fam210a	ENSMUSG00000038121.6	621	604	611	563	554	533	581.32	-0.154155	0.0831925	-1.85299	0.0638839	0.333422
ENSMUSG00000027184	Caprin1	ENSMUSG00000027184.14	2561	2552	2535	2439	2308	2439	2472.31	-0.090518	0.0488558	-1.85276	0.063917	0.333422
ENSMUSG00000097842	9330104G04Rik	ENSMUSG00000097842.2	46	42	56	76	69	57	57.6873	0.479549	0.258874	1.85244	0.0639624	NA
ENSMUSG00000016493	Cd46	ENSMUSG00000016493.13	329	303	347	267	246	320	301.989	-0.229967	0.124147	-1.85237	0.0639728	NA
ENSMUSG00000025486	Sirt3	ENSMUSG00000025486.17	537	541	529	588	603	598	565.928	0.154941	0.0836489	1.85227	0.0639868	0.333516
ENSMUSG00000034880	Mrpl34	ENSMUSG00000034880.7	146	169	173	206	213	174	179.957	0.278889	0.150569	1.85224	0.0639916	NA
ENSMUSG00000025608	Podxl	ENSMUSG00000025608.9	346	391	313	346	267	285	324.623	-0.231747	0.125144	-1.85185	0.0640476	NA
ENSMUSG00000025314	Ptprj	ENSMUSG00000025314.16	1012	1034	999	886	916	981	971.365	-0.128515	0.069412	-1.85148	0.0641012	0.333653
ENSMUSG00000082691	Dynlt1-ps1	ENSMUSG00000082691.6	51	21	24	44	58	48	40.9858	0.63114	0.340885	1.85147	0.0641013	NA
ENSMUSG00000055491	Pprc1	ENSMUSG00000055491.13	302	274	269	252	231	241	261.446	-0.225551	0.121825	-1.85143	0.0641071	NA
ENSMUSG00000023284	Zfp605	ENSMUSG00000023284.15	113	102	111	115	160	135	122.761	0.336213	0.181608	1.85131	0.0641249	NA
ENSMUSG00000036613	Eipr1	ENSMUSG00000036613.8	360	374	358	292	299	353	339.377	-0.207242	0.111945	-1.85129	0.0641285	NA
ENSMUSG00000028132	Tmem56	ENSMUSG00000028132.15	870	893	911	933	997	989	932.183	0.128182	0.0692582	1.85078	0.0642007	0.333653
ENSMUSG00000026939	Tmem141	ENSMUSG00000026939.12	108	121	110	137	149	135	126.747	0.315781	0.170622	1.85076	0.0642039	NA
ENSMUSG00000057886	Cbx3-ps6	ENSMUSG00000057886.5	45	29	31	29	21	16	28.3838	-0.701482	0.379073	-1.85052	0.0642383	NA
ENSMUSG00000030498	Gas2	ENSMUSG00000030498.15	94	83	84	107	111	115	99.2775	0.354316	0.191488	1.85033	0.0642655	NA
ENSMUSG00000021012	Zc3h14	ENSMUSG00000021012.16	717	625	718	783	715	794	725.321	0.154406	0.0834526	1.85022	0.0642822	0.333653
ENSMUSG00000100131	Gm28439	ENSMUSG00000100131.1	587	597	630	634	841	603	648.764	0.196592	0.106255	1.85019	0.0642869	0.333653
ENSMUSG00000025982	Sf3b1	ENSMUSG00000025982.13	2411	2363	2459	2545	2618	2530	2487.72	0.0892661	0.0482516	1.85001	0.0643117	0.333653
ENSMUSG00000029071	Dvl1	ENSMUSG00000029071.16	828	776	832	889	899	880	850.761	0.132455	0.0715996	1.84993	0.064323	0.333653
ENSMUSG00000020171	Yeats4	ENSMUSG00000020171.8	252	219	232	289	255	282	254.647	0.231274	0.125104	1.84865	0.0645087	NA
ENSMUSG00000028836	Slc30a2	ENSMUSG00000028836.14	43	36	32	22	26	23	30.4516	-0.642342	0.347467	-1.84864	0.0645095	NA
ENSMUSG00000020627	Klhl29	ENSMUSG00000020627.10	564	650	571	566	503	522	562.853	-0.168965	0.0914131	-1.84837	0.0645487	0.334555
ENSMUSG00000088982	Gm25600	ENSMUSG00000088982.1	26	24	21	38	41	32	30.527	0.640713	0.346666	1.84821	0.0645718	NA
ENSMUSG00000037995	Igsf9	ENSMUSG00000037995.15	52	29	36	30	22	23	32.0149	-0.659616	0.357035	-1.84748	0.0646772	NA
ENSMUSG00000049580	Tsku	ENSMUSG00000049580.12	17	13	14	18	32	26	20.0077	0.806533	0.436762	1.84662	0.0648025	NA
ENSMUSG00000049526	Tmem202	ENSMUSG00000049526.8	104	88	78	67	71	67	79.2016	-0.403023	0.218275	-1.8464	0.0648344	NA
ENSMUSG00000025255	Zfhx4	ENSMUSG00000025255.18	316	293	258	245	269	223	267.368	-0.235491	0.127562	-1.8461	0.0648783	NA
ENSMUSG00000000563	Atp5f1	ENSMUSG00000000563.17	2043	2089	2147	2278	2320	2129	2167.87	0.0988687	0.0535596	1.84596	0.0648984	0.336098
ENSMUSG00000097030	Gm26693	ENSMUSG00000097030.1	59	43	63	43	35	37	46.5203	-0.532134	0.288329	-1.84558	0.0649534	NA
ENSMUSG00000029624	Ptcd1	ENSMUSG00000029624.10	359	368	368	299	324	330	341.375	-0.196518	0.1065	-1.84525	0.0650017	0.336132
ENSMUSG00000048118	Arid4a	ENSMUSG00000048118.17	532	544	546	482	481	488	511.935	-0.161288	0.08741	-1.8452	0.0650091	0.336132
ENSMUSG00000022555	Dgat1	ENSMUSG00000022555.12	157	145	151	184	164	203	167.366	0.281998	0.15286	1.84481	0.0650652	NA
ENSMUSG00000020721	Helz	ENSMUSG00000020721.16	901	868	840	774	813	791	831.059	-0.13363	0.0724412	-1.84467	0.0650862	0.336202
ENSMUSG00000043419	Chd3os	ENSMUSG00000043419.11	1287	1151	1207	1283	1427	1266	1270.36	0.126779	0.068738	1.84439	0.0651268	0.336202
ENSMUSG00000097454	Gm26892	ENSMUSG00000097454.1	123	127	177	194	160	177	159.53	0.31412	0.170329	1.84419	0.0651553	NA
ENSMUSG00000053617	Sh3pxd2a	ENSMUSG00000053617.11	634	752	655	627	626	574	644.706	-0.162825	0.0883034	-1.84392	0.0651943	0.33621
ENSMUSG00000097728	Gm26840	ENSMUSG00000097728.1	223	243	209	192	187	190	207.379	-0.249988	0.13558	-1.84384	0.0652066	NA
ENSMUSG00000021643	Serf1	ENSMUSG00000021643.15	71	81	82	96	100	108	89.7558	0.372453	0.202027	1.84357	0.0652452	NA
ENSMUSG00000105836	Gm17954	ENSMUSG00000105836.1	7	3	3	0	0	2	2.49706	-2.75603	1.4951	-1.84338	0.0652733	NA
ENSMUSG00000037966	Ninj1	ENSMUSG00000037966.15	129	124	161	201	173	143	155.144	0.317323	0.172148	1.84332	0.0652829	NA
ENSMUSG00000022462	Slc38a2	ENSMUSG00000022462.7	1827	1891	2035	1736	1769	1837	1849.01	-0.106334	0.0576976	-1.84295	0.0653357	0.33621
ENSMUSG00000036155	Mgat5	ENSMUSG00000036155.13	1312	1206	1129	1152	1039	1137	1162.65	-0.132217	0.0717423	-1.84295	0.0653364	0.33621
ENSMUSG00000061451	Tmem151a	ENSMUSG00000061451.13	2247	2435	2254	2157	2170	2163	2237.74	-0.0962802	0.0522507	-1.84266	0.0653788	0.33621
ENSMUSG00000020190	Mknk2	ENSMUSG00000020190.13	395	374	381	328	336	344	359.743	-0.190193	0.10322	-1.84259	0.0653887	0.33621
ENSMUSG00000018470	Kcnab3	ENSMUSG00000018470.8	576	577	580	665	626	634	609.761	0.150237	0.0815623	1.84199	0.0654766	0.336371
ENSMUSG00000028568	Btf3l4	ENSMUSG00000028568.16	505	456	448	492	594	510	500.794	0.181765	0.0986961	1.84166	0.0655242	0.336371
ENSMUSG00000105561	Gm43462	ENSMUSG00000105561.1	3	5	4	8	10	12	7.02893	1.36104	0.739574	1.8403	0.0657247	NA
ENSMUSG00000043008	Klhl6	ENSMUSG00000043008.9	12	7	16	22	25	17	16.3299	0.908307	0.49359	1.8402	0.0657385	NA
ENSMUSG00000070287	Slc35g2	ENSMUSG00000070287.3	185	166	200	203	229	224	201.158	0.258048	0.140232	1.84015	0.0657468	NA
ENSMUSG00000036916	Zfp280c	ENSMUSG00000036916.13	212	189	232	226	261	262	230.389	0.247239	0.134366	1.84004	0.0657624	NA
ENSMUSG00000104861	3110039M20Rik	ENSMUSG00000104861.1	4	15	5	15	20	16	12.5672	1.07318	0.583247	1.84001	0.0657674	NA
ENSMUSG00000000216	Scnn1g	ENSMUSG00000000216.8	0	6	5	12	15	5	6.97014	1.53195	0.832595	1.83997	0.0657723	NA
ENSMUSG00000074220	Zfp382	ENSMUSG00000074220.10	158	153	154	129	125	124	140.682	-0.294874	0.160275	-1.8398	0.0657983	NA
ENSMUSG00000022037	Clu	ENSMUSG00000022037.15	5358	5445	5512	5437	4900	5072	5287.57	-0.0831834	0.0452282	-1.83919	0.0658866	0.337052
ENSMUSG00000001018	Snapin	ENSMUSG00000001018.15	439	455	470	506	543	488	483.651	0.170289	0.0925967	1.83904	0.0659089	0.337052
ENSMUSG00000039043	Arpin	ENSMUSG00000039043.5	183	174	177	216	200	221	194.987	0.25409	0.138171	1.83895	0.0659224	NA
ENSMUSG00000097660	Gm26762	ENSMUSG00000097660.1	1273	1307	1123	1163	1086	1139	1181.84	-0.12922	0.0702724	-1.83885	0.0659373	0.337052
ENSMUSG00000015149	Sirt2	ENSMUSG00000015149.14	1600	1648	1616	1536	1530	1463	1565.43	-0.103649	0.056376	-1.83853	0.065984	0.337052
ENSMUSG00000036241	Ube2r2	ENSMUSG00000036241.3	626	602	707	730	760	671	682.489	0.159207	0.086597	1.83848	0.0659917	0.337052
ENSMUSG00000070713	Gm10282	ENSMUSG00000070713.5	152	131	178	171	212	181	170.924	0.294618	0.160258	1.8384	0.0660032	NA
ENSMUSG00000071064	Zfp827	ENSMUSG00000071064.13	446	468	460	406	378	429	431.233	-0.179015	0.0973785	-1.83835	0.0660113	0.337052
ENSMUSG00000031538	Plat	ENSMUSG00000031538.6	458	434	481	368	437	400	429.605	-0.185235	0.100779	-1.83803	0.0660579	0.337052
ENSMUSG00000027692	Tnik	ENSMUSG00000027692.16	2084	2032	1945	1801	1837	1993	1948.73	-0.105154	0.0572136	-1.83792	0.0660742	0.337052
ENSMUSG00000087143	A830082K12Rik	ENSMUSG00000087143.9	200	240	253	273	269	276	251.917	0.23504	0.12789	1.83784	0.0660863	NA
ENSMUSG00000097648	9330185C12Rik	ENSMUSG00000097648.1	1	2	0	2	10	3	3.05609	2.39696	1.3047	1.83718	0.0661838	NA
ENSMUSG00000074578	Zfas1	ENSMUSG00000074578.13	132	163	174	132	132	115	141.33	-0.31137	0.169484	-1.83717	0.0661854	NA
ENSMUSG00000040270	Bach2	ENSMUSG00000040270.16	154	154	157	98	124	148	139.096	-0.320997	0.174743	-1.83697	0.0662149	NA
ENSMUSG00000022674	Ube2v2	ENSMUSG00000022674.15	355	394	342	416	439	392	389.491	0.191907	0.104479	1.83679	0.0662406	0.337633
ENSMUSG00000005774	Rfx5	ENSMUSG00000005774.12	266	222	240	289	273	289	263.263	0.226356	0.123239	1.83672	0.0662506	NA
ENSMUSG00000097699	5430400D12Rik	ENSMUSG00000097699.2	4	9	5	25	5	15	10.5489	1.24445	0.677941	1.83563	0.0664118	NA
ENSMUSG00000113898	Gm19144	ENSMUSG00000113898.1	12	10	6	2	6	2	6.26839	-1.49357	0.813757	-1.8354	0.0664461	NA
ENSMUSG00000039801	2410089E03Rik	ENSMUSG00000039801.7	728	667	633	621	571	627	641.244	-0.156704	0.0853869	-1.83523	0.0664722	0.338498
ENSMUSG00000110683	Gm45874	ENSMUSG00000110683.1	6	2	2	7	8	14	6.39383	1.49821	0.816442	1.83505	0.066498	NA
ENSMUSG00000028603	Scp2	ENSMUSG00000028603.15	831	893	837	909	1017	893	896.729	0.138421	0.0754525	1.83454	0.0665736	0.338498
ENSMUSG00000003233	Dvl3	ENSMUSG00000003233.12	728	706	687	685	572	649	671.045	-0.156054	0.0850644	-1.83454	0.0665736	0.338498
ENSMUSG00000020180	Snrpd3	ENSMUSG00000020180.10	700	825	841	696	716	717	749.242	-0.152689	0.0832474	-1.83416	0.0666304	0.338498
ENSMUSG00000020745	Pafah1b1	ENSMUSG00000020745.15	6399	6217	6380	6398	6912	6698	6500.88	0.0755269	0.0411843	1.83388	0.0666722	0.338498
ENSMUSG00000034993	Vat1	ENSMUSG00000034993.7	721	641	643	553	555	669	630.339	-0.170745	0.0931357	-1.83329	0.0667597	0.338676
ENSMUSG00000030590	Fam98c	ENSMUSG00000030590.15	232	247	258	320	272	274	266.99	0.22684	0.123744	1.83314	0.066782	NA
ENSMUSG00000062372	Otof	ENSMUSG00000062372.13	194	198	186	165	151	166	176.665	-0.26552	0.144878	-1.83271	0.0668454	NA
ENSMUSG00000032999	Nlrp4f	ENSMUSG00000032999.10	0	0	0	1	3	3	1.12136	3.62775	1.97987	1.83232	0.0669036	NA
ENSMUSG00000042359	Osbpl6	ENSMUSG00000042359.18	861	952	883	794	804	855	858.148	-0.135702	0.0740958	-1.83145	0.0670341	0.339801
ENSMUSG00000032217	Rnf111	ENSMUSG00000032217.13	406	383	369	365	329	319	361.818	-0.194821	0.106411	-1.83084	0.0671241	0.33999
ENSMUSG00000078572	Ndufaf8	ENSMUSG00000078572.3	109	116	77	161	120	113	116.102	0.370482	0.202456	1.82994	0.0672595	NA
ENSMUSG00000114552	Gm48570	ENSMUSG00000114552.1	1	1	5	0	0	0	1.16779	-3.66622	2.00355	-1.82986	0.0672704	NA
ENSMUSG00000033960	Jcad	ENSMUSG00000033960.5	1256	1237	1236	1084	1152	1197	1193.51	-0.116958	0.0639201	-1.82975	0.0672875	0.340551
ENSMUSG00000030760	Acer3	ENSMUSG00000030760.14	270	254	229	260	315	306	272.225	0.22936	0.12535	1.82975	0.0672876	NA
ENSMUSG00000114788	Gm48899	ENSMUSG00000114788.1	52	47	44	24	41	31	39.8573	-0.568263	0.310591	-1.82962	0.0673065	NA
ENSMUSG00000049482	Ctu2	ENSMUSG00000049482.16	125	114	115	142	151	143	131.444	0.304928	0.166665	1.82959	0.0673116	NA
ENSMUSG00000038803	Ost4	ENSMUSG00000038803.7	297	300	340	364	372	341	335.659	0.201749	0.110272	1.82956	0.0673158	NA
ENSMUSG00000110949	Nudt8	ENSMUSG00000110949.1	1	0	0	6	0	5	1.89962	3.26319	1.78381	1.82934	0.0673494	NA
ENSMUSG00000070697	Utp3	ENSMUSG00000070697.4	280	247	274	232	243	206	247.087	-0.234276	0.128125	-1.8285	0.067475	NA
ENSMUSG00000041939	Mvk	ENSMUSG00000041939.14	170	177	201	225	230	200	200.589	0.257331	0.140749	1.8283	0.0675043	NA
ENSMUSG00000044071	Fam19a2	ENSMUSG00000044071.8	476	536	545	605	602	544	551.425	0.166714	0.0912318	1.82737	0.0676446	0.34209
ENSMUSG00000020387	Jade2	ENSMUSG00000020387.15	745	847	695	590	665	763	717.302	-0.177809	0.0973312	-1.82684	0.0677237	0.342222
ENSMUSG00000108957	Gm45235	ENSMUSG00000108957.1	13	10	16	29	22	19	18.1139	0.836951	0.458144	1.82683	0.0677255	NA
ENSMUSG00000048349	Pou4f1	ENSMUSG00000048349.9	43	38	34	16	32	25	31.3826	-0.6472	0.354312	-1.82664	0.067754	NA
ENSMUSG00000026750	Psmb7	ENSMUSG00000026750.6	1178	1052	1195	1225	1310	1201	1193.63	0.126328	0.06917	1.82635	0.0677983	0.342331
ENSMUSG00000022325	Pop1	ENSMUSG00000022325.14	76	83	76	65	57	55	68.4906	-0.420444	0.230296	-1.82567	0.0679003	NA
ENSMUSG00000063229	Ldha	ENSMUSG00000063229.15	2379	2654	2557	2394	2351	2360	2449.26	-0.0962402	0.0527175	-1.82558	0.0679133	0.342355
ENSMUSG00000048833	Slc39a9	ENSMUSG00000048833.9	641	559	570	507	551	520	557.82	-0.163896	0.0897803	-1.82553	0.0679214	0.342355
ENSMUSG00000051504	Siglech	ENSMUSG00000051504.18	97	83	70	115	103	104	95.3843	0.367751	0.201453	1.82549	0.0679269	NA
ENSMUSG00000037652	Phc3	ENSMUSG00000037652.15	924	883	872	748	799	878	850.637	-0.140586	0.0770226	-1.82526	0.0679621	0.342355
ENSMUSG00000024429	Gnl1	ENSMUSG00000024429.9	1373	1455	1358	1509	1532	1471	1449.75	0.10773	0.0590549	1.82424	0.0681156	0.342861
ENSMUSG00000092118	Fancf	ENSMUSG00000092118.1	24	30	24	35	52	34	33.0674	0.625456	0.342921	1.82391	0.0681661	NA
ENSMUSG00000101856	1700096K18Rik	ENSMUSG00000101856.1	15	12	16	22	24	28	19.4587	0.792058	0.434376	1.82344	0.0682367	NA
ENSMUSG00000033208	S100b	ENSMUSG00000033208.7	1351	1275	1333	1553	1408	1345	1377.62	0.119819	0.0657178	1.82324	0.0682666	0.3432
ENSMUSG00000020882	Cacnb1	ENSMUSG00000020882.17	969	1183	976	859	954	997	989.63	-0.154194	0.08458	-1.82305	0.0682956	0.3432
ENSMUSG00000036422	Pcdh8	ENSMUSG00000036422.10	390	398	366	348	308	353	360.476	-0.194585	0.106772	-1.82243	0.0683892	0.3432
ENSMUSG00000016559	H3f3b	ENSMUSG00000016559.14	1793	1698	1919	1914	2074	1858	1876.09	0.11283	0.0619132	1.82238	0.0683969	0.3432
ENSMUSG00000021253	Tgfb3	ENSMUSG00000021253.7	168	199	203	152	165	155	173.708	-0.272843	0.149764	-1.82182	0.0684828	NA
ENSMUSG00000039428	Tmem135	ENSMUSG00000039428.11	584	621	561	507	504	566	557.198	-0.162963	0.0894642	-1.82154	0.0685247	0.3432
ENSMUSG00000084783	Gm15419	ENSMUSG00000084783.1	22	19	29	6	14	17	17.8514	-0.877835	0.481988	-1.82128	0.0685641	NA
ENSMUSG00000033157	Abhd10	ENSMUSG00000033157.17	169	180	211	232	205	233	204.958	0.258204	0.141804	1.82085	0.0686291	NA
ENSMUSG00000028657	Ppt1	ENSMUSG00000028657.14	941	915	929	998	987	1046	969.162	0.123091	0.0676113	1.82057	0.0686727	0.3432
ENSMUSG00000022553	Maf1	ENSMUSG00000022553.16	606	567	600	647	683	637	623.28	0.149615	0.0821812	1.82055	0.068676	0.3432
ENSMUSG00000030468	Siglecg	ENSMUSG00000030468.12	0	0	0	1	2	4	1.11675	3.62284	1.99026	1.82028	0.0687157	NA
ENSMUSG00000043911	Olfr922	ENSMUSG00000043911.5	0	0	0	1	2	4	1.11675	3.62284	1.99026	1.82028	0.0687157	NA
ENSMUSG00000037217	Syn1	ENSMUSG00000037217.15	3458	3551	3283	3367	3149	3168	3329.42	-0.0889625	0.0488786	-1.82007	0.068748	0.3432
ENSMUSG00000067847	Romo1	ENSMUSG00000067847.13	352	359	385	433	419	395	390.488	0.184462	0.101354	1.81999	0.0687608	0.3432
ENSMUSG00000051413	Plagl2	ENSMUSG00000051413.17	72	90	84	42	62	76	71.1498	-0.449119	0.246784	-1.81988	0.0687768	NA
ENSMUSG00000034586	Hid1	ENSMUSG00000034586.14	888	874	848	779	766	835	831.814	-0.133314	0.0732601	-1.81974	0.0687986	0.3432
ENSMUSG00000027199	Gatm	ENSMUSG00000027199.14	1244	1127	1150	1152	1068	1002	1123.92	-0.129212	0.0710088	-1.81966	0.0688105	0.3432
ENSMUSG00000032348	Gsta4	ENSMUSG00000032348.6	324	373	344	435	362	400	372.946	0.198476	0.109077	1.81959	0.0688207	0.3432
ENSMUSG00000031622	Sin3b	ENSMUSG00000031622.16	787	839	738	752	653	728	749.52	-0.149991	0.0824691	-1.81876	0.0689481	0.34357
ENSMUSG00000042129	Rassf4	ENSMUSG00000042129.8	234	244	199	215	188	163	207.038	-0.266065	0.146337	-1.81817	0.0690387	NA
ENSMUSG00000027371	Fahd2a	ENSMUSG00000027371.10	104	92	116	143	125	124	117.293	0.329451	0.181247	1.81769	0.0691108	NA
ENSMUSG00000029699	Ssc4d	ENSMUSG00000029699.13	6	5	3	10	9	14	7.91864	1.27105	0.699356	1.81746	0.0691474	NA
ENSMUSG00000028099	Polr3c	ENSMUSG00000028099.8	171	183	180	201	223	211	195.02	0.251566	0.138429	1.8173	0.0691717	NA
ENSMUSG00000057530	Ece1	ENSMUSG00000057530.14	626	675	672	620	600	559	625.286	-0.151819	0.0835421	-1.81728	0.0691747	0.344433
ENSMUSG00000097134	1110002J07Rik	ENSMUSG00000097134.2	10	10	5	3	2	4	5.79498	-1.52264	0.838064	-1.81686	0.0692386	NA
ENSMUSG00000027996	Sfrp2	ENSMUSG00000027996.13	33	24	17	35	41	39	31.3913	0.639666	0.352085	1.8168	0.0692485	NA
ENSMUSG00000037110	Ralgapa2	ENSMUSG00000037110.20	322	289	311	276	239	278	285.672	-0.217317	0.119617	-1.81678	0.0692503	NA
ENSMUSG00000097158	Gm26516	ENSMUSG00000097158.1	7	7	8	3	0	4	4.99327	-1.70062	0.93617	-1.81658	0.0692822	NA
ENSMUSG00000043498	9330132A10Rik	ENSMUSG00000043498.3	389	385	406	441	469	425	419.026	0.1776	0.097795	1.81604	0.0693641	0.345111
ENSMUSG00000054051	Ercc6	ENSMUSG00000054051.7	309	310	299	256	265	273	285.346	-0.208383	0.114778	-1.81554	0.0694415	NA
ENSMUSG00000032571	Pik3r4	ENSMUSG00000032571.14	419	426	389	357	336	389	385.751	-0.189134	0.104178	-1.81549	0.0694491	0.345267
ENSMUSG00000031551	Ido1	ENSMUSG00000031551.12	8	9	15	14	23	25	15.6622	0.91109	0.501899	1.81529	0.0694799	NA
ENSMUSG00000085658	Gm15704	ENSMUSG00000085658.1	2	1	1	3	7	6	3.41722	2.05438	1.13192	1.81494	0.0695326	NA
ENSMUSG00000096209	Olfr510	ENSMUSG00000096209.4	0	0	0	5	0	3	1.22733	3.73096	2.05585	1.81481	0.0695536	NA
ENSMUSG00000045875	Adra1a	ENSMUSG00000045875.13	150	147	159	103	118	145	136.862	-0.31345	0.172747	-1.81451	0.0695991	NA
ENSMUSG00000063286	Gm8995	ENSMUSG00000063286.7	53	61	29	40	28	26	39.5837	-0.615358	0.339174	-1.81428	0.0696344	NA
ENSMUSG00000041147	Brca2	ENSMUSG00000041147.10	106	88	81	114	124	112	104.374	0.347416	0.191507	1.81411	0.0696605	NA
ENSMUSG00000113654	Gm30893	ENSMUSG00000113654.1	8	15	20	12	4	5	10.5486	-1.1634	0.6415	-1.81356	0.0697451	NA
ENSMUSG00000014592	Camta1	ENSMUSG00000014592.20	3374	3289	3358	2987	3213	3234	3242.57	-0.0859561	0.0473971	-1.81353	0.0697497	0.345815
ENSMUSG00000024436	Mrps18b	ENSMUSG00000024436.16	131	138	127	105	108	104	118.905	-0.316318	0.174436	-1.81338	0.0697735	NA
ENSMUSG00000000184	Ccnd2	ENSMUSG00000000184.12	548	594	578	482	520	535	542.83	-0.160348	0.0884309	-1.81326	0.0697924	0.345815
ENSMUSG00000053783	1700016K19Rik	ENSMUSG00000053783.5	18	14	14	20	25	33	20.6504	0.778119	0.429164	1.81311	0.0698153	NA
ENSMUSG00000047037	Nipa1	ENSMUSG00000047037.5	808	745	801	851	855	872	822.015	0.132419	0.0730527	1.81265	0.0698851	0.345815
ENSMUSG00000037225	Fgf2	ENSMUSG00000037225.13	65	72	71	83	105	85	80.1676	0.392461	0.216515	1.81263	0.0698886	NA
ENSMUSG00000040078	Ptges3-ps	ENSMUSG00000040078.9	178	221	210	154	202	143	184.537	-0.290238	0.160124	-1.81258	0.0698965	NA
ENSMUSG00000025130	P4hb	ENSMUSG00000025130.11	913	902	863	878	754	805	852.43	-0.138113	0.076221	-1.812	0.0699855	0.345815
ENSMUSG00000018659	Pnpo	ENSMUSG00000018659.12	451	441	396	536	464	463	458.379	0.180819	0.0998055	1.81171	0.0700303	0.345815
ENSMUSG00000027519	Rab22a	ENSMUSG00000027519.10	687	734	638	754	748	775	722.661	0.144295	0.079647	1.81168	0.0700357	0.345815
ENSMUSG00000034926	Dhcr24	ENSMUSG00000034926.3	1337	1307	1237	1242	1174	1170	1244.51	-0.114753	0.0633456	-1.81153	0.0700584	0.345815
ENSMUSG00000071176	Arhgef10	ENSMUSG00000071176.10	671	726	644	610	612	621	647.498	-0.148658	0.0820645	-1.81147	0.0700674	0.345815
ENSMUSG00000037112	Sik2	ENSMUSG00000037112.16	411	536	415	357	401	421	423.534	-0.209084	0.115433	-1.81131	0.0700934	0.345815
ENSMUSG00000019179	Mdh2	ENSMUSG00000019179.10	2169	2135	2154	2089	1953	2015	2086.04	-0.0934322	0.0515928	-1.81095	0.0701481	0.345815
ENSMUSG00000003531	Dgcr6	ENSMUSG00000003531.15	394	386	399	476	441	420	419.492	0.177967	0.0982768	1.81088	0.07016	0.345815
ENSMUSG00000004031	Brinp2	ENSMUSG00000004031.13	773	782	712	693	669	695	720.636	-0.141036	0.0778942	-1.81061	0.0702018	0.345815
ENSMUSG00000104344	Gm38077	ENSMUSG00000104344.1	37	43	37	45	62	59	47.0947	0.510607	0.282103	1.81	0.0702961	NA
ENSMUSG00000022055	Nefl	ENSMUSG00000022055.7	5967	5789	5318	5447	5457	5177	5525.86	-0.0866756	0.0478937	-1.80975	0.0703346	0.346205
ENSMUSG00000028402	Mpdz	ENSMUSG00000028402.18	820	742	781	689	705	730	744.731	-0.139584	0.0771566	-1.8091	0.0704361	0.34644
ENSMUSG00000069743	Zfp820	ENSMUSG00000069743.4	8	6	4	13	11	16	9.59522	1.14366	0.632369	1.80854	0.0705232	NA
ENSMUSG00000085546	Gm14252	ENSMUSG00000085546.1	13	7	4	12	15	23	12.2611	1.05734	0.584689	1.80839	0.0705461	NA
ENSMUSG00000051675	Trim32	ENSMUSG00000051675.13	1860	1674	1748	1627	1653	1631	1698.63	-0.104302	0.0577015	-1.80761	0.0706679	0.347155
ENSMUSG00000026458	Ppfia4	ENSMUSG00000026458.13	1219	1132	1184	1378	1251	1220	1230.66	0.120902	0.0668904	1.80746	0.0706902	0.347155
ENSMUSG00000036611	Eepd1	ENSMUSG00000036611.5	171	183	182	154	140	151	163.572	-0.271344	0.15015	-1.80715	0.0707387	NA
ENSMUSG00000046897	Zfp740	ENSMUSG00000046897.17	849	769	790	909	885	848	841.711	0.133709	0.0739899	1.80713	0.0707427	0.347155
ENSMUSG00000112550	Gm6627	ENSMUSG00000112550.1	17	16	6	21	39	14	18.6351	0.922088	0.510279	1.80703	0.0707578	NA
ENSMUSG00000035441	Myo1d	ENSMUSG00000035441.14	216	236	217	200	187	179	205.771	-0.24489	0.135586	-1.80616	0.0708941	NA
ENSMUSG00000026090	2010300C02Rik	ENSMUSG00000026090.16	1470	1513	1388	1291	1413	1336	1401.9	-0.112883	0.0625375	-1.80505	0.0710674	0.348484
ENSMUSG00000047867	Gimap6	ENSMUSG00000047867.11	48	44	31	31	25	26	34.0827	-0.605505	0.335575	-1.80438	0.0711713	NA
ENSMUSG00000086108	Gm5602	ENSMUSG00000086108.2	18	20	20	12	9	10	14.7559	-0.895699	0.496436	-1.80426	0.0711908	NA
ENSMUSG00000033383	Rtp1	ENSMUSG00000033383.6	5	2	0	15	5	5	5.23457	1.76898	0.980489	1.80419	0.0712021	NA
ENSMUSG00000029088	Kcnip4	ENSMUSG00000029088.16	575	588	646	693	640	677	636.495	0.151204	0.0838225	1.80386	0.0712538	0.349133
ENSMUSG00000115096	CT030637.1	ENSMUSG00000115096.1	9	18	14	23	27	22	18.9341	0.806254	0.447149	1.8031	0.0713722	NA
ENSMUSG00000059040	Eno1b	ENSMUSG00000059040.4	200	214	170	145	169	168	177.843	-0.273492	0.151682	-1.80306	0.0713784	NA
ENSMUSG00000047921	Trappc9	ENSMUSG00000047921.16	733	784	682	687	637	663	697.787	-0.1475	0.0818429	-1.80223	0.0715085	0.350115
ENSMUSG00000036617	Etl4	ENSMUSG00000036617.16	879	952	851	777	815	848	853.857	-0.13531	0.0751278	-1.80107	0.0716921	0.350748
ENSMUSG00000014747	Ankrd53	ENSMUSG00000014747.6	33	23	33	22	16	16	23.9019	-0.715289	0.397159	-1.80101	0.0717008	NA
ENSMUSG00000028655	Mfsd2a	ENSMUSG00000028655.11	178	175	197	169	156	131	167.573	-0.279155	0.155045	-1.80048	0.0717846	NA
ENSMUSG00000053510	Nrd1	ENSMUSG00000053510.12	1268	1332	1365	1374	1456	1446	1373.44	0.10943	0.0607882	1.80018	0.0718327	0.350767
[truncated: 24,481 more rows]

## Sheet: Table S3
Table S3. 354 DEGs between KO and WT
Ensembl_id	Gene_symbol	Gene_id	WT1-expression level	WT2-expression level	WT3-expression level	KO1-expression level	KO2-expression level	KO3-expression level	log2FoldChange(KO/WT)	pvalue	padj
ENSMUSG00000096780	Tmem181b-ps	ENSMUSG00000096780.7	600	595	595	1744	1552	1667	1.46999	7.5027e-98	4.84524e-94
ENSMUSG00000000560	Gabra2	ENSMUSG00000000560.9	626	629	622	1375	1439	1443	1.18205	4.99585e-68	1.61316e-64
ENSMUSG00000073643	Wdfy1	ENSMUSG00000073643.11	200	194	193	580	673	684	1.72535	1.55798e-56	3.35381e-53
ENSMUSG00000090015	Gm15446	ENSMUSG00000090015.8	212	193	224	3	5	4	-5.72086	2.24579e-37	NA
ENSMUSG00000056999	Ide	ENSMUSG00000056999.14	1036	1063	974	478	411	543	-1.10158	1.77111e-33	2.85945e-30
ENSMUSG00000038418	Egr1	ENSMUSG00000038418.7	2191	2594	2514	1542	1524	1675	-0.622646	3.99977e-21	5.1661e-18
ENSMUSG00000033585	Ndn	ENSMUSG00000033585.5	1756	1563	1695	2443	2331	2558	0.549163	9.67428e-21	1.04127e-17
ENSMUSG00000062933	Gm10123	ENSMUSG00000062933.7	724	816	789	1744	2510	2242	1.4801	1.58449e-19	1.43411e-16
ENSMUSG00000040565	Btaf1	ENSMUSG00000040565.7	763	763	765	446	474	445	-0.74635	1.77653e-19	1.43411e-16
ENSMUSG00000091971	Hspa1a	ENSMUSG00000091971.3	147	171	137	46	41	41	-1.83682	1.22072e-17	NA
ENSMUSG00000026864	Hspa5	ENSMUSG00000026864.13	2895	3484	3149	2185	2102	2352	-0.521458	5.68083e-16	4.07631e-13
ENSMUSG00000101939	Gm28438	ENSMUSG00000101939.1	297	347	392	749	688	536	0.926273	2.55868e-14	1.6524e-11
ENSMUSG00000005483	Dnajb1	ENSMUSG00000005483.10	857	916	883	597	581	611	-0.570588	8.27853e-14	4.86025e-11
ENSMUSG00000023034	Nr4a1	ENSMUSG00000023034.7	1046	980	966	633	593	727	-0.61339	1.37149e-13	7.38092e-11
ENSMUSG00000052727	Map1b	ENSMUSG00000052727.6	12029	11884	10910	9215	8420	9701	-0.349311	1.21751e-11	6.04822e-09
ENSMUSG00000027951	Adar	ENSMUSG00000027951.16	2146	2224	2046	1693	1582	1678	-0.374217	3.04476e-11	1.4045e-08
ENSMUSG00000064367	mt-Nd5	ENSMUSG00000064367.1	38339	36336	40412	46747	50174	44863	0.301005	7.7249e-11	3.32583e-08
ENSMUSG00000003814	Calr	ENSMUSG00000003814.8	3252	3580	3050	2578	2342	2602	-0.394227	1.12342e-10	4.53439e-08
ENSMUSG00000064368	mt-Nd6	ENSMUSG00000064368.1	10752	11492	11794	13737	14689	13273	0.292788	1.62966e-10	6.1908e-08
ENSMUSG00000096255	Dynlt1	ENSMUSG00000096255.2	29	34	45	100	132	93	1.57907	4.8621e-10	NA
ENSMUSG00000029135	Fosl2	ENSMUSG00000029135.10	657	685	565	417	415	433	-0.592832	5.16687e-10	1.85376e-07
ENSMUSG00000022454	Nell2	ENSMUSG00000022454.17	4094	4174	4167	3362	3486	3510	-0.263002	7.98323e-10	2.71346e-07
ENSMUSG00000039485	Tspyl4	ENSMUSG00000039485.8	7516	7283	7362	6219	6284	6403	-0.228808	9.6793e-10	3.12545e-07
ENSMUSG00000029657	Hsph1	ENSMUSG00000029657.15	3388	3467	3276	2796	2743	2810	-0.279568	1.23596e-09	3.80087e-07
ENSMUSG00000056602	Fry	ENSMUSG00000056602.11	2096	2080	1907	1610	1499	1638	-0.358086	1.90465e-09	5.591e-07
ENSMUSG00000069601	Ank3	ENSMUSG00000069601.14	5432	5386	5008	4373	4263	4482	-0.270758	2.08716e-09	5.86039e-07
ENSMUSG00000105703	Gm43305	ENSMUSG00000105703.2	24	34	67	1	2	1	-4.98706	2.20011e-09	NA
ENSMUSG00000093954	Gm16867	ENSMUSG00000093954.8	31	33	30	0	0	0	-7.41787	2.87626e-09	NA
ENSMUSG00000023944	Hsp90ab1	ENSMUSG00000023944.14	15186	15464	14971	13520	12256	12867	-0.239872	2.90089e-09	7.80581e-07
ENSMUSG00000027254	Map1a	ENSMUSG00000027254.13	13234	13209	11501	10684	9842	10310	-0.299465	6.40065e-09	1.65342e-06
ENSMUSG00000030209	Grin2b	ENSMUSG00000030209.14	4796	4738	4551	3462	3627	4124	-0.328011	7.63338e-09	1.89601e-06
ENSMUSG00000023805	Synj2	ENSMUSG00000023805.17	1008	1123	975	693	768	803	-0.454221	1.22561e-08	2.93148e-06
ENSMUSG00000007594	Hapln4	ENSMUSG00000007594.10	1194	1371	1270	1013	914	974	-0.405116	1.33129e-08	3.07053e-06
ENSMUSG00000028341	Nr4a3	ENSMUSG00000028341.9	445	549	508	323	327	342	-0.597038	1.38873e-08	3.09255e-06
ENSMUSG00000019874	Fabp7	ENSMUSG00000019874.11	450	421	431	589	673	600	0.518102	1.63444e-08	3.51754e-06
ENSMUSG00000042834	Nrep	ENSMUSG00000042834.14	2215	2239	2418	3201	3108	2619	0.376664	1.68851e-08	3.51754e-06
ENSMUSG00000040035	Disp2	ENSMUSG00000040035.14	4486	4473	3833	3401	3049	3541	-0.356809	2.34668e-08	4.73589e-06
ENSMUSG00000063524	Eno1	ENSMUSG00000063524.13	7059	7441	6458	6068	5423	5473	-0.305848	2.50937e-08	4.91075e-06
ENSMUSG00000032589	Bsn	ENSMUSG00000032589.14	4364	4440	4149	3574	3351	3761	-0.27768	3.67548e-08	6.98125e-06
ENSMUSG00000022892	App	ENSMUSG00000022892.11	18880	19069	18250	16300	16079	16791	-0.192737	4.10873e-08	7.58119e-06
ENSMUSG00000019916	P4ha1	ENSMUSG00000019916.14	665	763	648	461	452	533	-0.522277	4.31293e-08	7.73692e-06
ENSMUSG00000058153	Sez6l	ENSMUSG00000058153.15	2351	2420	2141	1824	1674	1943	-0.345327	6.84573e-08	1.19486e-05
ENSMUSG00000090877	Hspa1b	ENSMUSG00000090877.3	134	199	146	28	54	22	-2.21012	6.989e-08	NA
ENSMUSG00000021282	Eif5	ENSMUSG00000021282.17	2140	2159	2242	2607	2660	2585	0.263885	7.03559e-08	1.19568e-05
ENSMUSG00000022602	Arc	ENSMUSG00000022602.14	1638	1796	1939	999	1051	1275	-0.691755	7.32923e-08	1.20466e-05
ENSMUSG00000004951	Hspb1	ENSMUSG00000004951.10	117	155	129	74	52	58	-1.13943	7.36388e-08	NA
ENSMUSG00000000787	Ddx3x	ENSMUSG00000000787.12	2681	2607	2666	3106	3157	3152	0.243895	7.4615e-08	1.20466e-05
ENSMUSG00000030302	Atp2b2	ENSMUSG00000030302.16	7407	8001	6929	6307	5943	6293	-0.268909	9.85841e-08	1.55282e-05
ENSMUSG00000001383	Zmat2	ENSMUSG00000001383.8	1387	1490	1528	1824	1857	1779	0.309383	1.0553e-07	1.62266e-05
ENSMUSG00000026131	Dst	ENSMUSG00000026131.18	6669	6207	5908	5149	4946	5467	-0.271203	1.11241e-07	1.67069e-05
ENSMUSG00000029467	Atp2a2	ENSMUSG00000029467.15	11126	11385	10813	9683	9115	9887	-0.216394	1.16457e-07	1.70927e-05
ENSMUSG00000048978	Nrsn1	ENSMUSG00000048978.14	2964	2973	2979	3448	3722	3440	0.251331	1.28446e-07	1.84334e-05
ENSMUSG00000051359	Ncald	ENSMUSG00000051359.15	3707	3979	3937	3193	3309	3334	-0.240583	2.07154e-07	2.90827e-05
ENSMUSG00000040249	Lrp1	ENSMUSG00000040249.15	6508	6431	5699	5268	4740	5282	-0.285898	2.54702e-07	3.4961e-05
ENSMUSG00000001774	Chordc1	ENSMUSG00000001774.8	1115	1211	1106	857	955	803	-0.392313	2.59852e-07	3.4961e-05
ENSMUSG00000047187	Rab2a	ENSMUSG00000047187.9	2341	2337	2484	2880	2858	2788	0.251361	2.79788e-07	3.6875e-05
ENSMUSG00000035781	R3hdm4	ENSMUSG00000035781.14	1302	1430	1397	1740	1699	1663	0.303975	2.90456e-07	3.75153e-05
ENSMUSG00000031996	Aplp2	ENSMUSG00000031996.17	7839	7657	7611	6934	6344	6655	-0.213617	3.03505e-07	3.84321e-05
ENSMUSG00000032060	Cryab	ENSMUSG00000032060.10	995	979	968	809	739	732	-0.369741	3.36109e-07	4.17421e-05
ENSMUSG00000032826	Ank2	ENSMUSG00000032826.17	9156	8800	8304	7536	7405	7664	-0.21614	3.51177e-07	4.27906e-05
ENSMUSG00000092609	Gm20481	ENSMUSG00000092609.1	69	76	72	31	28	20	-1.46515	3.66178e-07	NA
ENSMUSG00000030451	Herc2	ENSMUSG00000030451.16	3797	3764	3467	2991	2948	3236	-0.26512	4.43378e-07	5.30248e-05
ENSMUSG00000021313	Ryr2	ENSMUSG00000021313.16	2548	2474	2352	2059	1943	2117	-0.269019	7.70888e-07	9.05162e-05
ENSMUSG00000038664	Herc1	ENSMUSG00000038664.16	3149	3084	3058	2562	2356	2754	-0.275973	8.38622e-07	9.67111e-05
ENSMUSG00000097451	Rian	ENSMUSG00000097451.10	4609	4562	4759	5427	5160	5593	0.216091	8.77226e-07	9.93882e-05
ENSMUSG00000066036	Ubr4	ENSMUSG00000066036.14	2860	2726	2462	2144	1955	2323	-0.325218	1.05897e-06	0.000117911
ENSMUSG00000031708	Tecr	ENSMUSG00000031708.16	3565	3595	3310	3067	2624	2928	-0.281787	1.10327e-06	0.000120762
ENSMUSG00000015656	Hspa8	ENSMUSG00000015656.17	16240	16327	16502	14873	14334	14671	-0.161481	1.19494e-06	0.000128615
ENSMUSG00000064372	mt-Tp	ENSMUSG00000064372.1	738	810	912	1114	1088	1018	0.387077	1.25413e-06	0.000132773
ENSMUSG00000019947	Arid5b	ENSMUSG00000019947.10	533	515	529	321	406	390	-0.491929	1.42715e-06	0.000148654
ENSMUSG00000024966	Stip1	ENSMUSG00000024966.8	2310	2248	2212	1910	1862	1939	-0.245224	1.74859e-06	0.000179245
ENSMUSG00000096596	Gm10591	ENSMUSG00000096596.1	16	9	20	0	0	0	-6.35322	1.90617e-06	NA
ENSMUSG00000042744	Hectd4	ENSMUSG00000042744.16	3578	3432	3113	2829	2621	2914	-0.275371	1.95003e-06	0.00019677
ENSMUSG00000069072	Slc7a14	ENSMUSG00000069072.9	1581	1742	1551	1350	1265	1347	-0.29988	2.37786e-06	0.000236249
ENSMUSG00000020964	Sel1l	ENSMUSG00000020964.14	2123	2067	1996	1651	1680	1813	-0.264919	2.97079e-06	0.000290688
ENSMUSG00000021939	Ctsb	ENSMUSG00000021939.8	5786	5931	5777	5354	4925	4882	-0.207437	3.33733e-06	0.000321678
ENSMUSG00000029020	Mfn2	ENSMUSG00000029020.13	2116	2319	2035	1826	1768	1776	-0.269921	3.89053e-06	0.000368198
ENSMUSG00000025264	Tsr2	ENSMUSG00000025264.12	635	566	577	722	828	774	0.388947	3.93399e-06	0.000368198
ENSMUSG00000053192	Mllt11	ENSMUSG00000053192.9	2485	2512	2713	3023	3011	2998	0.228259	4.09447e-06	0.000377744
ENSMUSG00000053580	Tanc2	ENSMUSG00000053580.16	1887	1827	1673	1339	1353	1593	-0.328523	4.16788e-06	0.000379101
ENSMUSG00000039953	Clstn1	ENSMUSG00000039953.13	10583	11300	10168	9639	8970	9163	-0.207116	4.23428e-06	0.000379792
ENSMUSG00000083929	Gm10600	ENSMUSG00000083929.3	13	8	19	0	0	0	-6.18143	4.9074e-06	NA
ENSMUSG00000020484	Xbp1	ENSMUSG00000020484.18	775	915	827	657	637	653	-0.371566	4.9078e-06	0.000434172
ENSMUSG00000101671	Gm28221	ENSMUSG00000101671.1	923	1061	962	763	787	774	-0.34233	4.99006e-06	0.000435484
ENSMUSG00000051391	Ywhag	ENSMUSG00000051391.9	11856	12128	11830	10702	10581	10860	-0.156112	5.29477e-06	0.000450752
ENSMUSG00000050071	Bex1	ENSMUSG00000050071.8	600	607	640	455	493	450	-0.401349	5.3046e-06	0.000450752
ENSMUSG00000069833	Ahnak	ENSMUSG00000069833.12	436	485	438	354	292	327	-0.486466	5.5004e-06	0.000461319
ENSMUSG00000046876	Atxn1	ENSMUSG00000046876.16	884	875	784	678	651	664	-0.353037	6.64618e-06	0.000550269
ENSMUSG00000049044	Rapgef4	ENSMUSG00000049044.16	3435	3674	3897	3137	3154	3110	-0.22744	7.37837e-06	0.000603158
ENSMUSG00000096054	Syne1	ENSMUSG00000096054.3	8533	7975	7770	7165	6597	7213	-0.211024	7.64012e-06	0.000616749
ENSMUSG00000028410	Dnaja1	ENSMUSG00000028410.13	3751	3848	3869	3202	3389	3388	-0.200038	8.27469e-06	0.000659727
ENSMUSG00000034825	Nrip3	ENSMUSG00000034825.14	1536	1435	1545	1783	1795	1794	0.251242	8.41992e-06	0.00066312
ENSMUSG00000033004	Mycbp2	ENSMUSG00000033004.15	4635	4510	4524	3755	3747	4207	-0.222422	8.6367e-06	0.000671998
ENSMUSG00000045193	Cirbp	ENSMUSG00000045193.13	481	436	451	614	600	583	0.392756	9.34751e-06	0.000717889
ENSMUSG00000004110	Cacna1e	ENSMUSG00000004110.16	3039	3173	3036	2581	2349	2794	-0.259815	9.44883e-06	0.000717889
ENSMUSG00000022255	Mtdh	ENSMUSG00000022255.16	896	939	1011	1109	1194	1223	0.309862	1.20447e-05	0.000904473
ENSMUSG00000024335	Brd2	ENSMUSG00000024335.19	1660	1737	1603	2022	1934	1962	0.24178	1.24906e-05	0.000927178
ENSMUSG00000056222	Spock1	ENSMUSG00000056222.15	2187	2173	2129	1966	1719	1766	-0.253305	1.37762e-05	0.000998669
ENSMUSG00000048154	Kmt2d	ENSMUSG00000048154.17	1571	1511	1333	1304	1043	1123	-0.350122	1.38851e-05	0.000998669
ENSMUSG00000032115	Hyou1	ENSMUSG00000032115.14	1224	1298	1117	969	892	1036	-0.329631	1.39177e-05	0.000998669
ENSMUSG00000030695	Aldoa	ENSMUSG00000030695.16	11463	11977	11125	10585	9711	10122	-0.184728	1.41723e-05	0.00100577
ENSMUSG00000061601	Pclo	ENSMUSG00000061601.15	3355	3401	3224	2734	2453	3050	-0.276784	1.43904e-05	0.00101014
ENSMUSG00000025153	Fasn	ENSMUSG00000025153.9	2899	3138	2679	2462	2290	2531	-0.259813	1.76859e-05	0.00122647
ENSMUSG00000035885	Cox8a	ENSMUSG00000035885.4	2741	2859	2997	3423	3466	3160	0.224428	1.79145e-05	0.00122647
ENSMUSG00000039542	Ncam1	ENSMUSG00000039542.16	2774	2719	2492	2282	2128	2341	-0.242669	1.80419e-05	0.00122647
ENSMUSG00000025261	Huwe1	ENSMUSG00000025261.17	4372	4142	3922	3556	3330	3728	-0.228349	1.82713e-05	0.00122912
ENSMUSG00000002028	Kmt2a	ENSMUSG00000002028.13	2277	2224	2183	1664	1859	2009	-0.270578	1.85532e-05	0.00123522
ENSMUSG00000049313	Sorl1	ENSMUSG00000049313.8	5043	5387	4816	4538	4020	4451	-0.229663	1.98187e-05	0.00130601
ENSMUSG00000053536	Cstf2t	ENSMUSG00000053536.6	920	915	899	734	754	727	-0.302927	2.26452e-05	0.00146981
ENSMUSG00000018411	Mapt	ENSMUSG00000018411.17	5369	5391	5094	4696	4581	4740	-0.177825	2.27595e-05	0.00146981
ENSMUSG00000015837	Sqstm1	ENSMUSG00000015837.15	4062	4113	3882	3641	3443	3484	-0.191088	2.54277e-05	0.00162586
ENSMUSG00000020850	Prpf8	ENSMUSG00000020850.14	2422	2459	2370	2102	1959	2152	-0.223282	2.59355e-05	0.00164207
ENSMUSG00000060681	Slc9a6	ENSMUSG00000060681.15	1325	1320	1264	1462	1589	1615	0.257093	2.97984e-05	0.0018538
ENSMUSG00000025190	Got1	ENSMUSG00000025190.13	3706	3805	3527	3345	3058	3165	-0.20709	2.98537e-05	0.0018538
ENSMUSG00000071659	Hnrnpul2	ENSMUSG00000071659.3	3710	3611	3535	3069	3222	3223	-0.189387	3.21497e-05	0.00197736
ENSMUSG00000031391	L1cam	ENSMUSG00000031391.18	1460	1444	1260	1142	1001	1195	-0.319001	3.26344e-05	0.00198586
ENSMUSG00000102543	Pcdhgc5	ENSMUSG00000102543.5	759	835	725	533	599	655	-0.373578	3.2903e-05	0.00198586
ENSMUSG00000022228	Zscan26	ENSMUSG00000022228.14	907	932	886	663	720	788	-0.325431	3.46669e-05	0.00207295
ENSMUSG00000074505	Fat3	ENSMUSG00000074505.5	1103	1102	1027	808	892	922	-0.299408	3.64181e-05	0.00215769
ENSMUSG00000024942	Capn1	ENSMUSG00000024942.16	294	246	240	343	386	362	0.487588	3.68253e-05	NA
ENSMUSG00000002100	Mybpc3	ENSMUSG00000002100.15	64	51	64	163	98	96	0.984777	3.75289e-05	NA
ENSMUSG00000066392	Nrxn3	ENSMUSG00000066392.11	2604	2667	2565	2177	2250	2352	-0.208329	3.76892e-05	0.0022127
ENSMUSG00000031770	Herpud1	ENSMUSG00000031770.16	563	582	547	417	436	455	-0.371002	4.05768e-05	0.00236077
ENSMUSG00000043940	Wdfy3	ENSMUSG00000043940.15	3509	3446	3044	2690	2814	2967	-0.238375	4.1936e-05	0.00241806
ENSMUSG00000036766	Dner	ENSMUSG00000036766.12	2270	2251	2193	2051	1795	1867	-0.234636	4.32838e-05	0.00247369
ENSMUSG00000074657	Kif5a	ENSMUSG00000074657.5	23740	23759	22987	21667	21549	20954	-0.135566	4.62921e-05	0.0026224
ENSMUSG00000052698	Tln2	ENSMUSG00000052698.15	1650	1710	1530	1398	1323	1391	-0.250801	4.76741e-05	0.00264868
ENSMUSG00000004207	Psap	ENSMUSG00000004207.14	14010	14533	13849	12900	12594	12893	-0.143311	4.79044e-05	0.00264868
ENSMUSG00000034135	Sik3	ENSMUSG00000034135.15	1758	1798	1579	1366	1362	1524	-0.271682	4.79862e-05	0.00264868
ENSMUSG00000020048	Hsp90b1	ENSMUSG00000020048.13	2461	2450	2407	2173	2100	2102	-0.199482	4.866e-05	0.0026631
ENSMUSG00000085830	Grin1os	ENSMUSG00000085830.1	1987	2052	1783	1660	1443	1691	-0.280741	5.19902e-05	0.00282145
ENSMUSG00000022769	Sdf2l1	ENSMUSG00000022769.9	120	184	139	70	99	79	-0.833379	5.27112e-05	NA
ENSMUSG00000024073	Birc6	ENSMUSG00000024073.15	2039	1830	1858	1675	1526	1627	-0.246413	5.38757e-05	0.00289941
ENSMUSG00000028634	Hivep3	ENSMUSG00000028634.17	724	807	810	528	591	682	-0.375403	5.4806e-05	0.0029251
ENSMUSG00000003316	Glg1	ENSMUSG00000003316.14	3216	3221	2894	2610	2575	2808	-0.223072	5.59967e-05	0.00296415
ENSMUSG00000034892	Rps29	ENSMUSG00000034892.8	1168	1254	1394	1516	1578	1511	0.270954	6.17803e-05	0.00324372
ENSMUSG00000045482	Trrap	ENSMUSG00000045482.16	1753	1786	1653	1445	1362	1553	-0.251802	6.23166e-05	0.00324549
ENSMUSG00000059003	Grin2a	ENSMUSG00000059003.12	1459	1492	1332	1252	1170	1156	-0.261407	6.87631e-05	0.00355258
ENSMUSG00000045983	Eif4g1	ENSMUSG00000045983.16	3329	3199	3162	2881	2697	2896	-0.193536	6.95476e-05	0.00356459
ENSMUSG00000029328	Hnrnpdl	ENSMUSG00000029328.15	1651	1358	1543	1897	1771	1818	0.269692	7.05446e-05	0.00358722
ENSMUSG00000040225	Prrc2c	ENSMUSG00000040225.15	2473	2494	2230	1971	1947	2173	-0.240116	7.14298e-05	0.00360386
ENSMUSG00000095675	Ccl21b	ENSMUSG00000095675.1	9	18	2	0	0	0	-5.73	8.81311e-05	NA
ENSMUSG00000028804	Csmd2	ENSMUSG00000028804.20	727	722	629	478	490	611	-0.392885	8.87504e-05	0.00443297
ENSMUSG00000020571	Pdia6	ENSMUSG00000020571.12	1201	1471	1298	1048	1069	1124	-0.293048	8.97503e-05	0.00443297
ENSMUSG00000020893	Per1	ENSMUSG00000020893.17	962	996	991	781	782	861	-0.282496	9.03182e-05	0.00443297
ENSMUSG00000038128	Camk4	ENSMUSG00000038128.6	3331	3253	3365	3836	3756	3636	0.174117	9.06088e-05	0.00443297
ENSMUSG00000019082	Slc25a22	ENSMUSG00000019082.18	1717	1853	1642	1555	1392	1438	-0.250851	9.16178e-05	0.00444863
ENSMUSG00000031778	Cx3cl1	ENSMUSG00000031778.13	4839	5396	4817	4360	4121	4562	-0.206928	9.70345e-05	0.0046268
ENSMUSG00000025823	Pdia4	ENSMUSG00000025823.9	415	443	399	329	321	299	-0.409133	9.71633e-05	0.0046268
ENSMUSG00000034336	Ina	ENSMUSG00000034336.3	2728	2827	2419	2269	2294	2252	-0.227002	9.74365e-05	0.0046268
ENSMUSG00000026959	Grin1	ENSMUSG00000026959.13	4034	4394	3887	3775	3105	3508	-0.246615	9.92326e-05	0.0046777
ENSMUSG00000028790	Khdrbs1	ENSMUSG00000028790.13	1232	1315	1347	1126	1098	1051	-0.251178	0.000110877	0.00518872
ENSMUSG00000036452	Arhgap26	ENSMUSG00000036452.17	1290	1329	1341	1152	1125	1078	-0.240534	0.00011535	0.00535922
ENSMUSG00000107756	Gm44164	ENSMUSG00000107756.1	24	35	16	6	5	6	-2.16609	0.000116042	NA
ENSMUSG00000026442	Nfasc	ENSMUSG00000026442.14	4304	3958	3692	3617	3103	3428	-0.237024	0.000116504	0.00537416
ENSMUSG00000038894	Irs2	ENSMUSG00000038894.7	961	1065	839	764	713	799	-0.333166	0.000126204	0.00578031
ENSMUSG00000040383	Aqr	ENSMUSG00000040383.16	527	512	461	383	386	391	-0.371012	0.000127847	0.00581434
ENSMUSG00000018648	Dusp14	ENSMUSG00000018648.15	281	349	326	252	214	219	-0.487715	0.000129175	NA
ENSMUSG00000024427	Spry4	ENSMUSG00000024427.6	227	222	192	134	122	166	-0.601537	0.000133987	NA
ENSMUSG00000039671	Zmynd8	ENSMUSG00000039671.18	1200	1374	1305	1082	1101	1067	-0.255968	0.000138745	0.00622433
ENSMUSG00000026193	Fn1	ENSMUSG00000026193.15	725	710	747	577	608	582	-0.302711	0.000138836	0.00622433
ENSMUSG00000042406	Atf4	ENSMUSG00000042406.8	1041	1098	1095	936	914	838	-0.267863	0.000140682	0.00622433
ENSMUSG00000030103	Bhlhe40	ENSMUSG00000030103.11	905	1151	980	767	748	879	-0.343269	0.000140717	0.00622433
ENSMUSG00000008348	Ubc	ENSMUSG00000008348.9	941	844	873	732	673	756	-0.297686	0.000142054	0.00624073
ENSMUSG00000030020	Prickle2	ENSMUSG00000030020.13	1792	1866	1769	1413	1549	1640	-0.236172	0.00014713	0.00642005
ENSMUSG00000020142	Slc1a4	ENSMUSG00000020142.12	672	685	612	514	513	544	-0.325866	0.000152222	0.0065617
ENSMUSG00000026112	Coa5	ENSMUSG00000026112.7	839	752	790	932	1014	944	0.281071	0.000152409	0.0065617
ENSMUSG00000078816	Prkcg	ENSMUSG00000078816.9	2204	2391	2163	2048	1700	1938	-0.250717	0.000157899	0.00675307
ENSMUSG00000021750	Fam107a	ENSMUSG00000021750.15	2768	2643	2729	3196	3383	2880	0.216358	0.000161134	0.00684607
ENSMUSG00000050211	Pla2g4e	ENSMUSG00000050211.14	43	37	43	87	73	79	0.94509	0.000163682	NA
ENSMUSG00000020737	Hn1	ENSMUSG00000020737.12	391	352	328	457	498	447	0.38939	0.000170794	0.00720905
ENSMUSG00000027894	Slc6a17	ENSMUSG00000027894.14	5295	5511	5159	4658	4564	4956	-0.171196	0.000176529	0.00740276
ENSMUSG00000027763	Mbnl1	ENSMUSG00000027763.13	1159	1105	1137	912	972	975	-0.248476	0.000186613	0.00777512
ENSMUSG00000030683	Sez6l2	ENSMUSG00000030683.11	3087	3192	2669	2719	2332	2472	-0.251198	0.000188703	0.00781183
ENSMUSG00000038170	Pde4dip	ENSMUSG00000038170.15	2119	2251	2044	1849	1776	1916	-0.211312	0.000192418	0.00789537
ENSMUSG00000115469	CT010505.2	ENSMUSG00000115469.1	2079	2029	1902	1708	1684	1797	-0.211537	0.000193166	0.00789537
ENSMUSG00000095562	Gm21887	ENSMUSG00000095562.7	37	27	17	79	69	43	1.23257	0.000199952	NA
ENSMUSG00000022416	Cacna1i	ENSMUSG00000022416.15	1226	1258	1096	991	1015	986	-0.258852	0.000205674	0.00835373
ENSMUSG00000001924	Uba1	ENSMUSG00000001924.15	3839	4196	3470	3349	3045	3399	-0.232916	0.000207611	0.00837972
ENSMUSG00000005533	Igf1r	ENSMUSG00000005533.10	885	927	783	709	680	721	-0.299334	0.000209851	0.00841748
ENSMUSG00000035864	Syt1	ENSMUSG00000035864.14	10629	11394	11076	9462	9784	10380	-0.159705	0.000211413	0.0084278
ENSMUSG00000037152	Ndufc1	ENSMUSG00000037152.11	381	378	374	540	486	445	0.374178	0.000214383	0.00849378
ENSMUSG00000039568	Ubald1	ENSMUSG00000039568.6	772	823	781	699	624	619	-0.295061	0.000232743	0.00916496
ENSMUSG00000039501	Znfx1	ENSMUSG00000039501.14	731	731	691	610	507	605	-0.324064	0.000236037	0.00923835
ENSMUSG00000079564	Gm11149	ENSMUSG00000079564.3	666	672	569	521	456	522	-0.348435	0.000238976	0.00929704
ENSMUSG00000041444	Arhgap32	ENSMUSG00000041444.14	3186	3242	2964	2652	2661	2888	-0.194839	0.000240473	0.00929924
ENSMUSG00000030268	Bcat1	ENSMUSG00000030268.17	1242	1226	1109	980	976	1042	-0.253651	0.000243407	0.00935667
ENSMUSG00000054423	Cadps	ENSMUSG00000054423.14	3379	3390	3253	2996	2888	3033	-0.168723	0.00024705	0.00944052
ENSMUSG00000055866	Per2	ENSMUSG00000055866.9	324	418	296	210	222	285	-0.530946	0.000252355	NA
ENSMUSG00000032301	Psma4	ENSMUSG00000032301.13	614	571	586	740	716	712	0.291787	0.000253011	0.00961145
ENSMUSG00000027296	Itpka	ENSMUSG00000027296.7	818	954	885	715	762	697	-0.290164	0.0002647	0.00999667
ENSMUSG00000042182	Bend6	ENSMUSG00000042182.16	1513	1492	1585	1829	1800	1688	0.211452	0.000271604	0.0101978
ENSMUSG00000062591	Tubb4a	ENSMUSG00000062591.5	7900	8072	7227	7242	6358	6751	-0.18952	0.000281559	0.0105104
ENSMUSG00000089774	Slc5a3	ENSMUSG00000089774.2	549	573	485	404	398	449	-0.35916	0.000286001	0.0106149
ENSMUSG00000023033	Scn8a	ENSMUSG00000023033.14	3693	3869	3458	3220	2990	3381	-0.20044	0.000300835	0.0111017
ENSMUSG00000016150	Tenm1	ENSMUSG00000016150.15	1076	996	1035	828	766	946	-0.289592	0.000309038	0.0113396
ENSMUSG00000058006	Mdn1	ENSMUSG00000058006.12	1003	997	855	792	678	826	-0.314719	0.000312577	0.0114046
ENSMUSG00000070003	Ssbp4	ENSMUSG00000070003.7	624	648	681	820	821	744	0.286985	0.000318712	0.0115632
ENSMUSG00000027499	Pkia	ENSMUSG00000027499.12	1901	1759	1976	2141	2297	2093	0.213099	0.000322501	0.0116353
ENSMUSG00000047976	Kcna1	ENSMUSG00000047976.4	1568	1587	1421	1260	1327	1323	-0.226236	0.00033478	0.0120112
ENSMUSG00000094800	Gm9780	ENSMUSG00000094800.8	1	1	3	22	29	2	3.40726	0.000337115	NA
ENSMUSG00000026944	Abca2	ENSMUSG00000026944.18	3739	3430	3150	3088	2821	2996	-0.213016	0.000343452	0.0122111
ENSMUSG00000024030	Abcg1	ENSMUSG00000024030.6	702	693	617	577	492	542	-0.32273	0.000344135	0.0122111
ENSMUSG00000022658	Tagln3	ENSMUSG00000022658.10	2159	2096	2153	2536	2410	2339	0.183973	0.000363627	0.0127657
ENSMUSG00000040459	Arglu1	ENSMUSG00000040459.11	1199	1152	1259	1389	1412	1399	0.219376	0.000363717	0.0127657
ENSMUSG00000031983	2310022B05Rik	ENSMUSG00000031983.7	742	666	666	842	879	798	0.281407	0.000371488	0.0129449
ENSMUSG00000025020	Slit1	ENSMUSG00000025020.11	666	622	587	499	424	545	-0.352533	0.000372832	0.0129449
ENSMUSG00000036158	Prickle1	ENSMUSG00000036158.12	769	845	797	647	664	682	-0.275036	0.000378903	0.0130853
ENSMUSG00000006711	D130043K22Rik	ENSMUSG00000006711.15	393	446	428	303	328	345	-0.376108	0.000386128	0.0132639
ENSMUSG00000064370	mt-Cytb	ENSMUSG00000064370.1	56711	56754	61720	64557	69371	61930	0.160931	0.000392149	0.0133994
ENSMUSG00000059970	Hspa2	ENSMUSG00000059970.7	335	379	348	269	287	244	-0.409954	0.000409756	NA
ENSMUSG00000048078	Tenm4	ENSMUSG00000048078.16	1309	1385	1281	1095	1065	1207	-0.238903	0.000417451	0.0141889
ENSMUSG00000020716	Nf1	ENSMUSG00000020716.16	1176	1211	1086	1009	834	1016	-0.281593	0.000420922	0.014232
ENSMUSG00000002052	Supt6	ENSMUSG00000002052.6	1989	2137	1924	1734	1641	1840	-0.214312	0.000426066	0.0143108
ENSMUSG00000024213	Nudt3	ENSMUSG00000024213.14	2811	2987	3016	2768	2506	2422	-0.197373	0.000427683	0.0143108
ENSMUSG00000022565	Plec	ENSMUSG00000022565.15	1892	1942	1689	1611	1474	1631	-0.228835	0.000435298	0.0144905
ENSMUSG00000041313	Slc7a1	ENSMUSG00000041313.14	658	678	638	538	561	510	-0.29593	0.00044095	0.0146034
ENSMUSG00000106375	Gm43361	ENSMUSG00000106375.1	724	697	666	542	574	588	-0.289655	0.000445136	0.0146668
ENSMUSG00000071172	Srsf3	ENSMUSG00000071172.12	1456	1419	1532	1255	1299	1248	-0.212474	0.000454164	0.0148883
ENSMUSG00000039804	Ncoa5	ENSMUSG00000039804.15	637	600	563	473	446	517	-0.324029	0.000462423	0.0150825
ENSMUSG00000037266	Rsrp1	ENSMUSG00000037266.18	2411	2173	2268	2608	2517	2670	0.186751	0.000476536	0.0154647
ENSMUSG00000022311	Csmd3	ENSMUSG00000022311.15	439	408	413	305	318	352	-0.367538	0.000480724	0.0155226
ENSMUSG00000036098	Myrf	ENSMUSG00000036098.15	766	680	661	550	565	595	-0.299811	0.000491062	0.0157775
ENSMUSG00000029777	Gars	ENSMUSG00000029777.10	1164	1091	1203	1028	932	968	-0.240999	0.0005115	0.0163528
ENSMUSG00000027963	Extl2	ENSMUSG00000027963.14	1012	948	1021	836	853	830	-0.242477	0.00052615	0.0167383
ENSMUSG00000021250	Fos	ENSMUSG00000021250.13	404	306	411	253	270	300	-0.442337	0.000541509	NA
ENSMUSG00000024042	Sik1	ENSMUSG00000024042.6	241	196	198	125	160	150	-0.538383	0.000544649	NA
ENSMUSG00000020428	Gabra6	ENSMUSG00000020428.13	956	938	1051	1382	1241	1027	0.307843	0.000545098	0.0171658
ENSMUSG00000030284	Creld1	ENSMUSG00000030284.11	663	704	689	597	508	570	-0.297818	0.000547369	0.0171658
ENSMUSG00000017740	Slc12a5	ENSMUSG00000017740.17	6698	6834	6363	6129	5592	6091	-0.160001	0.000547561	0.0171658
ENSMUSG00000022443	Myh9	ENSMUSG00000022443.17	1062	1196	931	915	815	872	-0.295587	0.000553941	0.0172819
ENSMUSG00000063077	Kif1b	ENSMUSG00000063077.14	10668	10713	9933	9399	9182	9760	-0.143863	0.000564291	0.0175045
ENSMUSG00000005871	Apc	ENSMUSG00000005871.14	4133	4025	3926	3345	3747	3634	-0.170752	0.000566496	0.0175045
ENSMUSG00000004455	Ppp1cc	ENSMUSG00000004455.16	1347	1466	1448	1707	1825	1508	0.241477	0.000571826	0.017585
ENSMUSG00000024413	Npc1	ENSMUSG00000024413.13	910	908	834	774	639	762	-0.28815	0.000590596	0.0180762
ENSMUSG00000021373	Cap2	ENSMUSG00000021373.16	2113	2192	2146	1822	1944	1923	-0.180422	0.000607254	0.0184983
ENSMUSG00000031765	Mt1	ENSMUSG00000031765.8	1558	1455	1549	1764	1894	1643	0.217035	0.000616783	0.0187004
ENSMUSG00000097545	Mir124a-1hg	ENSMUSG00000097545.7	1277	1353	1335	1608	1413	1613	0.224203	0.000628597	0.0189349
ENSMUSG00000025217	Btrc	ENSMUSG00000025217.15	998	1037	1017	804	875	899	-0.242261	0.000630381	0.0189349
ENSMUSG00000028833	Ncdn	ENSMUSG00000028833.13	11044	11711	10588	10298	9743	10090	-0.146484	0.00065148	0.0194374
ENSMUSG00000097274	Gm47512	ENSMUSG00000097274.2	2850	3027	2991	2536	2612	2732	-0.169689	0.000653132	0.0194374
ENSMUSG00000020604	Arsg	ENSMUSG00000020604.13	338	369	364	286	267	272	-0.378297	0.000658319	NA
ENSMUSG00000033419	Snap91	ENSMUSG00000033419.15	3503	3591	3255	3051	3147	3011	-0.16857	0.00066004	0.019515
ENSMUSG00000030884	Uqcrc2	ENSMUSG00000030884.12	1715	1733	1750	1964	1996	1925	0.178889	0.000661783	0.019515
ENSMUSG00000085001	Rapgef4os2	ENSMUSG00000085001.1	555	605	581	461	463	490	-0.301003	0.000687084	0.020169
ENSMUSG00000044676	Zfp612	ENSMUSG00000044676.10	618	569	591	716	712	716	0.270371	0.000701196	0.0204901
ENSMUSG00000017677	Wsb1	ENSMUSG00000017677.11	956	901	963	1052	1094	1169	0.23574	0.000712339	0.020722
ENSMUSG00000034891	Sncb	ENSMUSG00000034891.13	2682	2971	2849	3230	3149	3175	0.167455	0.000725766	0.0210179
ENSMUSG00000021451	Sema4d	ENSMUSG00000021451.16	941	997	926	792	799	832	-0.2409	0.000736638	0.0211731
ENSMUSG00000046658	Zfp316	ENSMUSG00000046658.16	256	261	281	315	385	349	0.396443	0.000742583	NA
ENSMUSG00000002957	Ap2a2	ENSMUSG00000002957.11	1936	2054	1860	1790	1611	1692	-0.201501	0.000750642	0.0211731
ENSMUSG00000056258	Kcnq3	ENSMUSG00000056258.9	1771	1803	1887	1546	1558	1667	-0.193671	0.000750993	0.0211731
ENSMUSG00000090327	Gm17111	ENSMUSG00000090327.1	492	519	423	440	292	336	-0.431103	0.000752009	0.0211731
ENSMUSG00000026356	Dars	ENSMUSG00000026356.15	545	531	515	642	643	645	0.279028	0.000752855	0.0211731
ENSMUSG00000010376	Nedd8	ENSMUSG00000010376.15	840	859	859	998	1053	962	0.236115	0.000753688	0.0211731
ENSMUSG00000073702	Rpl31	ENSMUSG00000073702.11	1756	1830	1897	2248	2124	1951	0.20413	0.000754073	0.0211731
ENSMUSG00000038056	Kmt2c	ENSMUSG00000038056.15	1523	1450	1377	1247	1255	1266	-0.206691	0.000786048	0.0219753
ENSMUSG00000038690	Atp5j2	ENSMUSG00000038690.15	863	845	859	1095	1030	932	0.249721	0.000801837	0.0223201
ENSMUSG00000029765	Plxna4	ENSMUSG00000029765.12	1212	1172	1147	1022	992	1026	-0.215891	0.00080838	0.0224056
ENSMUSG00000022452	Smdt1	ENSMUSG00000022452.15	842	1010	961	1117	1135	1092	0.247853	0.000819735	0.0226233
ENSMUSG00000070733	Fryl	ENSMUSG00000070733.13	999	996	915	822	802	840	-0.239722	0.000830995	0.0228365
ENSMUSG00000097971	Gm26917	ENSMUSG00000097971.3	242	192	213	156	143	159	-0.496262	0.000852492	NA
ENSMUSG00000070436	Serpinh1	ENSMUSG00000070436.12	304	321	314	231	236	249	-0.391355	0.000853805	NA
ENSMUSG00000038244	Mical2	ENSMUSG00000038244.13	1767	1972	1865	1624	1549	1702	-0.201876	0.000857387	0.0234619
ENSMUSG00000034275	Igsf9b	ENSMUSG00000034275.18	1585	1601	1393	1344	1178	1361	-0.238642	0.000914448	0.0249177
ENSMUSG00000001930	Vwf	ENSMUSG00000001930.17	209	261	187	144	140	171	-0.528791	0.000924965	NA
ENSMUSG00000037625	Cldn11	ENSMUSG00000037625.7	2375	2603	2502	2386	1958	2104	-0.216333	0.000930672	0.0252533
ENSMUSG00000018707	Dync1h1	ENSMUSG00000018707.13	7268	7644	6309	5433	4641	5847	-0.414602	0.000937797	0.0253401
ENSMUSG00000085438	1700020I14Rik	ENSMUSG00000085438.1	6393	6173	6327	6671	7406	6846	0.147788	0.000960082	0.0258039
ENSMUSG00000022197	Pdzd2	ENSMUSG00000022197.16	644	712	694	505	580	589	-0.289548	0.000963877	0.0258039
ENSMUSG00000078887	Gm6710	ENSMUSG00000078887.10	83	13	63	12	8	6	-2.6502	0.00096428	NA
ENSMUSG00000041697	Cox6a1	ENSMUSG00000041697.8	3444	3987	3665	4367	4352	3935	0.188599	0.000966948	0.0258039
ENSMUSG00000026933	Camsap1	ENSMUSG00000026933.17	1252	1247	1114	1023	1044	1027	-0.224031	0.000976346	0.0259475
ENSMUSG00000046785	Epm2aip1	ENSMUSG00000046785.8	2204	2200	2143	1802	1884	2053	-0.188394	0.000982032	0.0259917
ENSMUSG00000091542	Gm17167	ENSMUSG00000091542.1	9	14	4	0	0	1	-4.67942	0.00099734	NA
ENSMUSG00000021794	Glud1	ENSMUSG00000021794.16	2456	2263	2438	2664	2734	2636	0.167522	0.0010008	0.0263804
ENSMUSG00000034187	Nsf	ENSMUSG00000034187.18	7924	8235	7784	7211	7257	7452	-0.127204	0.00101314	0.0265969
ENSMUSG00000036427	Gpi1	ENSMUSG00000036427.5	5642	5885	5470	5286	4890	5168	-0.148145	0.00101753	0.0266041
ENSMUSG00000004961	Syt5	ENSMUSG00000004961.7	1034	1149	1159	970	927	958	-0.228811	0.00103153	0.0268614
ENSMUSG00000058135	Gstm1	ENSMUSG00000058135.12	875	872	804	1015	1053	945	0.239847	0.00103811	0.0269241
ENSMUSG00000098975	Gm27177	ENSMUSG00000098975.7	208	69	102	12	4	33	-2.9653	0.00103836	NA
ENSMUSG00000026426	Arl8a	ENSMUSG00000026426.10	1497	1589	1561	1704	1785	1791	0.184628	0.00104795	0.0270705
ENSMUSG00000025777	Gdap1	ENSMUSG00000025777.8	1225	1230	1304	1404	1491	1421	0.20011	0.001065	0.0274014
ENSMUSG00000063316	Rpl27	ENSMUSG00000063316.13	1191	1134	1198	1356	1384	1312	0.201939	0.0010786	0.0276412
ENSMUSG00000035383	Pmch	ENSMUSG00000035383.7	138	140	124	173	181	220	0.51728	0.00112232	NA
ENSMUSG00000030357	Fkbp4	ENSMUSG00000030357.10	1676	1712	1785	1567	1490	1496	-0.185423	0.00112399	0.0285785
ENSMUSG00000075706	Gpx4	ENSMUSG00000075706.10	1715	1740	1851	2122	2083	1875	0.195457	0.00112918	0.0285785
ENSMUSG00000031197	Vbp1	ENSMUSG00000031197.11	715	680	715	834	851	811	0.242611	0.0011324	0.0285785
ENSMUSG00000020577	Tspan13	ENSMUSG00000020577.17	1674	1604	1710	1505	1401	1468	-0.190181	0.00113288	0.0285785
ENSMUSG00000051586	Mical3	ENSMUSG00000051586.16	1421	1488	1271	1175	1228	1182	-0.221206	0.0011572	0.0290785
ENSMUSG00000045095	Magi1	ENSMUSG00000045095.16	1274	1262	1208	1038	1055	1137	-0.211832	0.00120144	0.0300733
ENSMUSG00000045038	Prkce	ENSMUSG00000045038.14	3702	4033	3698	3319	3426	3503	-0.157767	0.00121123	0.0302013
ENSMUSG00000020814	Mxra7	ENSMUSG00000020814.13	131	142	137	199	189	187	0.483868	0.00126506	NA
ENSMUSG00000032777	Gtf3c1	ENSMUSG00000032777.9	1322	1350	1252	1156	1080	1164	-0.207268	0.00129695	0.0322143
ENSMUSG00000051853	Arf3	ENSMUSG00000051853.10	9406	10219	9252	8554	8893	8776	-0.139063	0.00130496	0.032289
ENSMUSG00000023915	Tnfrsf21	ENSMUSG00000023915.4	1052	1068	986	891	884	891	-0.220365	0.00131043	0.0323006
ENSMUSG00000022285	Ywhaz	ENSMUSG00000022285.17	7489	7885	7394	7109	6693	6964	-0.133322	0.00131594	0.032313
ENSMUSG00000023169	Slc38a1	ENSMUSG00000023169.15	3337	3301	3239	2941	3023	2979	-0.142857	0.00132893	0.0325085
ENSMUSG00000043079	Synpo	ENSMUSG00000043079.17	1251	1503	1210	1120	1120	1105	-0.246274	0.00135343	0.032971
ENSMUSG00000030058	Copg1	ENSMUSG00000030058.17	2975	3098	2853	2672	2546	2750	-0.163945	0.00135805	0.032971
ENSMUSG00000020482	Ccdc117	ENSMUSG00000020482.4	273	291	295	240	186	220	-0.416387	0.00135935	NA
ENSMUSG00000068739	Sars	ENSMUSG00000068739.13	1756	1809	1805	1645	1524	1578	-0.179079	0.00139354	0.033706
ENSMUSG00000055407	Map6	ENSMUSG00000055407.14	1229	1259	1132	1016	1011	1086	-0.217406	0.00141048	0.0339884
ENSMUSG00000025151	Maged1	ENSMUSG00000025151.16	4854	4696	4509	4317	3901	4359	-0.160816	0.00143173	0.0343721
ENSMUSG00000038248	Sobp	ENSMUSG00000038248.8	797	812	814	644	651	737	-0.25216	0.00147261	0.0352227
ENSMUSG00000030655	Smg1	ENSMUSG00000030655.15	3115	2977	2757	2679	2557	2635	-0.169228	0.00148982	0.0355028
ENSMUSG00000040761	Spen	ENSMUSG00000040761.16	1047	1039	947	886	846	864	-0.225823	0.00149811	0.0355692
ENSMUSG00000013089	Etv5	ENSMUSG00000013089.15	986	1153	1012	858	853	946	-0.245999	0.00153276	0.0361907
ENSMUSG00000004032	Gstm5	ENSMUSG00000004032.10	872	898	902	1069	1074	975	0.222128	0.00153641	0.0361907
ENSMUSG00000039318	Rab3gap2	ENSMUSG00000039318.12	999	1194	1068	895	878	976	-0.246366	0.0015411	0.0361907
ENSMUSG00000025855	Prkar1b	ENSMUSG00000025855.13	6155	6500	6179	5785	5658	5809	-0.126865	0.00158593	0.0371085
ENSMUSG00000059248	Sept9	ENSMUSG00000059248.13	567	648	577	488	488	499	-0.281853	0.00163639	0.0381508
ENSMUSG00000031561	Tenm3	ENSMUSG00000031561.16	1110	990	1034	815	883	952	-0.238886	0.00165862	0.0385302
ENSMUSG00000086360	Gm16214	ENSMUSG00000086360.1	298	291	312	217	196	264	-0.410692	0.00169115	NA
ENSMUSG00000006920	Ezh1	ENSMUSG00000006920.14	778	772	715	611	651	642	-0.248786	0.00169317	0.0390544
ENSMUSG00000022973	Synj1	ENSMUSG00000022973.18	4027	4009	3856	3262	3457	3828	-0.172134	0.00169329	0.0390544
ENSMUSG00000027350	Chgb	ENSMUSG00000027350.8	4446	4555	4729	4145	4068	4272	-0.137007	0.00170074	0.0390868
ENSMUSG00000086040	Wipf3	ENSMUSG00000086040.8	984	1081	902	800	818	879	-0.247815	0.0017421	0.0398953
ENSMUSG00000006575	Rundc3a	ENSMUSG00000006575.14	2333	2292	2420	2701	2581	2568	0.155577	0.00174869	0.0399048
ENSMUSG00000032265	Fam46a	ENSMUSG00000032265.14	142	115	136	90	82	90	-0.584753	0.00178543	NA
ENSMUSG00000074923	Pak6	ENSMUSG00000074923.10	453	547	487	575	636	608	0.291033	0.00178759	0.0406382
ENSMUSG00000031530	Dusp4	ENSMUSG00000031530.6	162	217	163	139	104	130	-0.546828	0.00179138	NA
ENSMUSG00000022263	Trio	ENSMUSG00000022263.10	2268	2382	2181	1935	2070	2061	-0.170723	0.00179876	0.0406382
ENSMUSG00000022463	Srebf2	ENSMUSG00000022463.8	2293	2280	2109	1980	1968	2005	-0.166435	0.00179971	0.0406382
ENSMUSG00000034088	Hdlbp	ENSMUSG00000034088.15	2192	2247	2112	1933	1849	2033	-0.172055	0.0018248	0.0410612
ENSMUSG00000042750	Bex2	ENSMUSG00000042750.7	1613	1693	1784	1543	1528	1366	-0.199655	0.00187329	0.041806
ENSMUSG00000032572	Col6a4	ENSMUSG00000032572.9	22	22	21	7	8	5	-1.64917	0.00187979	NA
ENSMUSG00000042453	Reln	ENSMUSG00000042453.14	1455	1552	1463	1364	1203	1327	-0.200567	0.00188214	0.041806
ENSMUSG00000020074	Ccar1	ENSMUSG00000020074.7	694	697	749	606	577	615	-0.251264	0.00188236	0.041806
ENSMUSG00000001229	Dpp9	ENSMUSG00000001229.8	719	736	681	619	538	621	-0.264845	0.0018838	0.041806
ENSMUSG00000037851	Iars	ENSMUSG00000037851.13	694	677	678	583	536	597	-0.255982	0.00191298	0.0423084
ENSMUSG00000056749	Nfil3	ENSMUSG00000056749.7	142	160	170	114	100	113	-0.527914	0.00191885	NA
ENSMUSG00000030224	Strap	ENSMUSG00000030224.10	1260	1354	1294	1098	1192	1111	-0.200236	0.0019289	0.0425148
ENSMUSG00000048644	Ctxn1	ENSMUSG00000048644.8	2129	2433	2315	2532	2720	2530	0.17787	0.00194439	0.0427105
ENSMUSG00000055430	Nap1l5	ENSMUSG00000055430.4	4249	4089	4285	4477	4651	4704	0.13266	0.00197105	0.0429896
ENSMUSG00000003363	Pld3	ENSMUSG00000003363.15	4008	4368	3941	3710	3541	3808	-0.155822	0.0019716	0.0429896
ENSMUSG00000003199	Mpnd	ENSMUSG00000003199.16	497	507	480	674	580	561	0.287533	0.00197707	0.0429896
ENSMUSG00000034593	Myo5a	ENSMUSG00000034593.16	5912	5812	5870	5200	5173	5640	-0.135317	0.00199229	0.0431753
ENSMUSG00000047215	Rpl9	ENSMUSG00000047215.14	1693	1642	1830	1947	2005	1892	0.178682	0.0020396	0.0440526
ENSMUSG00000019726	Lyst	ENSMUSG00000019726.12	828	896	782	700	688	731	-0.24206	0.00206776	0.0444236
ENSMUSG00000039474	Wfs1	ENSMUSG00000039474.13	846	901	740	692	717	671	-0.258609	0.00207053	0.0444236
ENSMUSG00000027651	Rprd1b	ENSMUSG00000027651.16	381	346	354	284	282	289	-0.337218	0.00207587	NA
ENSMUSG00000110631	Gm42047	ENSMUSG00000110631.1	71	34	76	32	22	34	-1.04311	0.00209974	NA
ENSMUSG00000022054	Nefm	ENSMUSG00000022054.11	7016	6768	5893	5983	5767	5766	-0.168096	0.00210844	0.0450871
ENSMUSG00000034994	Eef2	ENSMUSG00000034994.10	11565	11777	10921	10980	10203	10035	-0.134791	0.00213204	0.0454413
ENSMUSG00000064345	mt-Nd2	ENSMUSG00000064345.1	32492	33445	35459	37945	38862	34781	0.138113	0.00219868	0.0467076
ENSMUSG00000009863	Sdhb	ENSMUSG00000009863.14	857	938	889	1083	1079	972	0.222134	0.00223197	0.0472593
ENSMUSG00000005667	Mthfd2	ENSMUSG00000005667.8	128	116	118	88	85	67	-0.600794	0.00224099	NA
ENSMUSG00000017485	Top2b	ENSMUSG00000017485.11	1331	1288	1391	1466	1620	1491	0.191735	0.0022472	0.0474263
ENSMUSG00000085925	Rtl1	ENSMUSG00000085925.3	83	93	72	48	37	60	-0.769775	0.00229526	NA
ENSMUSG00000055945	Prr18	ENSMUSG00000055945.8	906	930	829	784	728	761	-0.23137	0.00231053	0.048604
ENSMUSG00000038013	Wipf2	ENSMUSG00000038013.14	906	962	891	776	809	785	-0.219307	0.00234555	0.0491804
ENSMUSG00000035954	Dock4	ENSMUSG00000035954.10	1339	1361	1331	1164	1127	1240	-0.190932	0.00239712	0.0499507
ENSMUSG00000025487	Psmd13	ENSMUSG00000025487.15	497	465	538	625	592	593	0.270748	0.00239776	0.0499507

## Sheet: Table S4
Table S4. Gene ontology (GO) enrichment analysis of 354 DEGs.
GO Term	ID	Input number	Background number	P-Value	Corrected P-Value	Input	Hyperlink
intracellular	GO:0005622	243	11177	1.49e-24	8.07e-21	ENSMUSG00000040249|ENSMUSG00000024073|ENSMUSG00000006575|ENSMUSG00000030357|ENSMUSG00000068739|ENSMUSG00000025855|ENSMUSG00000022263|ENSMUSG00000023805|ENSMUSG00000031770|ENSMUSG00000019947|ENSMUSG00000038894|ENSMUSG00000026959|ENSMUSG00000022565|ENSMUSG00000059003|ENSMUSG00000031778|ENSMUSG00000059248|ENSMUSG00000042453|ENSMUSG00000039953|ENSMUSG00000034088|ENSMUSG00000047215|ENSMUSG00000056602|…	http://amigo.geneontology.org/cgi-bin/amigo/term_details?term=GO:0005622
intracellular part	GO:0044424	241	11083	3.9e-24	1.02e-20	ENSMUSG00000040249|ENSMUSG00000024073|ENSMUSG00000006575|ENSMUSG00000030357|ENSMUSG00000068739|ENSMUSG00000025855|ENSMUSG00000022263|ENSMUSG00000023805|ENSMUSG00000031770|ENSMUSG00000019947|ENSMUSG00000038894|ENSMUSG00000026959|ENSMUSG00000022565|ENSMUSG00000059003|ENSMUSG00000031778|ENSMUSG00000059248|ENSMUSG00000042453|ENSMUSG00000039953|ENSMUSG00000034088|ENSMUSG00000047215|ENSMUSG00000056602|…	http://amigo.geneontology.org/cgi-bin/amigo/term_details?term=GO:0044424
neuron part	GO:0097458	72	1301	5.67e-24	1.02e-20	ENSMUSG00000025190|ENSMUSG00000040249|ENSMUSG00000026131|ENSMUSG00000022892|ENSMUSG00000021373|ENSMUSG00000027894|ENSMUSG00000063077|ENSMUSG00000034891|ENSMUSG00000030357|ENSMUSG00000049044|ENSMUSG00000030209|ENSMUSG00000032589|ENSMUSG00000023805|ENSMUSG00000078816|ENSMUSG00000031770|ENSMUSG00000062591|ENSMUSG00000035864|ENSMUSG00000056258|ENSMUSG00000059003|ENSMUSG00000029777|ENSMUSG00000005533|…	http://amigo.geneontology.org/cgi-bin/amigo/term_details?term=GO:0097458
cytoplasm	GO:0005737	209	8864	4.49e-23	6.08e-20	ENSMUSG00000040249|ENSMUSG00000024073|ENSMUSG00000006575|ENSMUSG00000030357|ENSMUSG00000068739|ENSMUSG00000025855|ENSMUSG00000022263|ENSMUSG00000023805|ENSMUSG00000031770|ENSMUSG00000002957|ENSMUSG00000038894|ENSMUSG00000026959|ENSMUSG00000022565|ENSMUSG00000059003|ENSMUSG00000031778|ENSMUSG00000059248|ENSMUSG00000042453|ENSMUSG00000039953|ENSMUSG00000034088|ENSMUSG00000047215|ENSMUSG00000056602|…	http://amigo.geneontology.org/cgi-bin/amigo/term_details?term=GO:0005737
protein binding	GO:0005515	180	6985	1.36e-22	1.47e-19	ENSMUSG00000040249|ENSMUSG00000024073|ENSMUSG00000006575|ENSMUSG00000030357|ENSMUSG00000025855|ENSMUSG00000022263|ENSMUSG00000023805|ENSMUSG00000031770|ENSMUSG00000002957|ENSMUSG00000038894|ENSMUSG00000022565|ENSMUSG00000059003|ENSMUSG00000031778|ENSMUSG00000059248|ENSMUSG00000039953|ENSMUSG00000034088|ENSMUSG00000001774|ENSMUSG00000051391|ENSMUSG00000021794|ENSMUSG00000042453|ENSMUSG00000004951|…	http://amigo.geneontology.org/cgi-bin/amigo/term_details?term=GO:0005515
intracellular organelle	GO:0043229	219	9665	1.63e-22	1.47e-19	ENSMUSG00000040249|ENSMUSG00000024073|ENSMUSG00000030357|ENSMUSG00000068739|ENSMUSG00000023805|ENSMUSG00000031770|ENSMUSG00000002957|ENSMUSG00000028341|ENSMUSG00000026959|ENSMUSG00000022565|ENSMUSG00000059003|ENSMUSG00000059248|ENSMUSG00000039953|ENSMUSG00000034088|ENSMUSG00000047215|ENSMUSG00000056602|ENSMUSG00000021794|ENSMUSG00000034892|ENSMUSG00000004951|ENSMUSG00000040761|ENSMUSG00000034891|…	http://amigo.geneontology.org/cgi-bin/amigo/term_details?term=GO:0043229
cell	GO:0005623	257	12696	3.37e-22	2.28e-19	ENSMUSG00000040249|ENSMUSG00000024073|ENSMUSG00000006575|ENSMUSG00000030357|ENSMUSG00000068739|ENSMUSG00000025855|ENSMUSG00000022263|ENSMUSG00000023805|ENSMUSG00000031770|ENSMUSG00000041313|ENSMUSG00000038894|ENSMUSG00000026959|ENSMUSG00000022565|ENSMUSG00000059003|ENSMUSG00000031778|ENSMUSG00000059248|ENSMUSG00000042453|ENSMUSG00000039953|ENSMUSG00000034088|ENSMUSG00000047215|ENSMUSG00000056602|…	http://amigo.geneontology.org/cgi-bin/amigo/term_details?term=GO:0005623
cell part	GO:0044464	257	12696	3.37e-22	2.28e-19	ENSMUSG00000040249|ENSMUSG00000024073|ENSMUSG00000006575|ENSMUSG00000030357|ENSMUSG00000068739|ENSMUSG00000025855|ENSMUSG00000022263|ENSMUSG00000023805|ENSMUSG00000031770|ENSMUSG00000041313|ENSMUSG00000038894|ENSMUSG00000026959|ENSMUSG00000022565|ENSMUSG00000059003|ENSMUSG00000031778|ENSMUSG00000059248|ENSMUSG00000042453|ENSMUSG00000039953|ENSMUSG00000034088|ENSMUSG00000047215|ENSMUSG00000056602|…	http://amigo.geneontology.org/cgi-bin/amigo/term_details?term=GO:0044464
organelle	GO:0043226	229	10598	2.54e-21	1.53e-18	ENSMUSG00000040249|ENSMUSG00000024073|ENSMUSG00000030357|ENSMUSG00000068739|ENSMUSG00000023805|ENSMUSG00000031770|ENSMUSG00000019947|ENSMUSG00000028341|ENSMUSG00000026959|ENSMUSG00000022565|ENSMUSG00000059003|ENSMUSG00000059248|ENSMUSG00000039953|ENSMUSG00000034088|ENSMUSG00000047215|ENSMUSG00000056602|ENSMUSG00000021794|ENSMUSG00000034892|ENSMUSG00000004951|ENSMUSG00000040761|ENSMUSG00000034891|…	http://amigo.geneontology.org/cgi-bin/amigo/term_details?term=GO:0043226
cellular process	GO:0009987	243	11700	2.93e-21	1.58e-18	ENSMUSG00000040249|ENSMUSG00000024073|ENSMUSG00000006575|ENSMUSG00000030357|ENSMUSG00000068739|ENSMUSG00000025855|ENSMUSG00000022263|ENSMUSG00000023805|ENSMUSG00000031770|ENSMUSG00000041313|ENSMUSG00000038894|ENSMUSG00000026959|ENSMUSG00000022565|ENSMUSG00000059003|ENSMUSG00000031778|ENSMUSG00000059248|ENSMUSG00000042453|ENSMUSG00000039953|ENSMUSG00000049313|ENSMUSG00000047215|ENSMUSG00000056602|…	http://amigo.geneontology.org/cgi-bin/amigo/term_details?term=GO:0009987
neuron projection	GO:0043005	58	1005	4.43e-20	2.18e-17	ENSMUSG00000040249|ENSMUSG00000023915|ENSMUSG00000020716|ENSMUSG00000063077|ENSMUSG00000034891|ENSMUSG00000030357|ENSMUSG00000022892|ENSMUSG00000020428|ENSMUSG00000032589|ENSMUSG00000023805|ENSMUSG00000056258|ENSMUSG00000022454|ENSMUSG00000035864|ENSMUSG00000059003|ENSMUSG00000005533|ENSMUSG00000018411|ENSMUSG00000034187|ENSMUSG00000034593|ENSMUSG00000029777|ENSMUSG00000026959|ENSMUSG00000022054|…	http://amigo.geneontology.org/cgi-bin/amigo/term_details?term=GO:0043005
single-organism process	GO:0044699	222	10288	5.39e-20	2.43e-17	ENSMUSG00000032589|ENSMUSG00000040249|ENSMUSG00000024073|ENSMUSG00000006575|ENSMUSG00000030357|ENSMUSG00000068739|ENSMUSG00000025855|ENSMUSG00000022263|ENSMUSG00000023805|ENSMUSG00000031770|ENSMUSG00000019947|ENSMUSG00000038894|ENSMUSG00000026959|ENSMUSG00000022565|ENSMUSG00000059003|ENSMUSG00000031778|ENSMUSG00000059248|ENSMUSG00000042453|ENSMUSG00000039953|ENSMUSG00000034088|ENSMUSG00000056602|…	http://amigo.geneontology.org/cgi-bin/amigo/term_details?term=GO:0044699
intracellular membrane-bounded organelle	GO:0043231	201	8811	9.51e-20	3.96e-17	ENSMUSG00000040249|ENSMUSG00000024073|ENSMUSG00000030357|ENSMUSG00000068739|ENSMUSG00000023805|ENSMUSG00000031770|ENSMUSG00000002957|ENSMUSG00000028341|ENSMUSG00000026959|ENSMUSG00000059003|ENSMUSG00000039953|ENSMUSG00000034088|ENSMUSG00000047215|ENSMUSG00000021794|ENSMUSG00000004951|ENSMUSG00000040761|ENSMUSG00000034891|ENSMUSG00000037152|ENSMUSG00000025264|ENSMUSG00000020893|ENSMUSG00000053192|…	http://amigo.geneontology.org/cgi-bin/amigo/term_details?term=GO:0043231
membrane-bounded organelle	GO:0043227	214	9845	4.15e-19	1.6e-16	ENSMUSG00000040249|ENSMUSG00000024073|ENSMUSG00000030357|ENSMUSG00000068739|ENSMUSG00000023805|ENSMUSG00000031770|ENSMUSG00000019947|ENSMUSG00000028341|ENSMUSG00000026959|ENSMUSG00000022565|ENSMUSG00000059003|ENSMUSG00000039953|ENSMUSG00000034088|ENSMUSG00000047215|ENSMUSG00000051391|ENSMUSG00000021794|ENSMUSG00000034892|ENSMUSG00000004951|ENSMUSG00000040761|ENSMUSG00000034891|ENSMUSG00000037152|…	http://amigo.geneontology.org/cgi-bin/amigo/term_details?term=GO:0043227
binding	GO:0005488	223	10562	8.1e-19	2.92e-16	ENSMUSG00000040249|ENSMUSG00000024073|ENSMUSG00000006575|ENSMUSG00000030357|ENSMUSG00000068739|ENSMUSG00000025855|ENSMUSG00000022263|ENSMUSG00000023805|ENSMUSG00000031770|ENSMUSG00000019947|ENSMUSG00000038894|ENSMUSG00000026959|ENSMUSG00000022565|ENSMUSG00000059003|ENSMUSG00000031778|ENSMUSG00000059248|ENSMUSG00000042453|ENSMUSG00000039953|ENSMUSG00000034088|ENSMUSG00000047215|ENSMUSG00000051391|…	http://amigo.geneontology.org/cgi-bin/amigo/term_details?term=GO:0005488
single-organism cellular process	GO:0044763	204	9204	1.24e-18	4.19e-16	ENSMUSG00000040249|ENSMUSG00000024073|ENSMUSG00000006575|ENSMUSG00000030357|ENSMUSG00000068739|ENSMUSG00000022263|ENSMUSG00000023805|ENSMUSG00000031770|ENSMUSG00000019947|ENSMUSG00000038894|ENSMUSG00000026959|ENSMUSG00000022565|ENSMUSG00000059003|ENSMUSG00000031778|ENSMUSG00000059248|ENSMUSG00000042453|ENSMUSG00000039953|ENSMUSG00000049313|ENSMUSG00000056602|ENSMUSG00000021794|ENSMUSG00000034892|…	http://amigo.geneontology.org/cgi-bin/amigo/term_details?term=GO:0044763
cytoplasmic part	GO:0044444	153	5890	2.54e-18	8.08e-16	ENSMUSG00000040249|ENSMUSG00000024073|ENSMUSG00000006575|ENSMUSG00000030357|ENSMUSG00000068739|ENSMUSG00000023805|ENSMUSG00000031770|ENSMUSG00000002957|ENSMUSG00000038894|ENSMUSG00000022565|ENSMUSG00000059003|ENSMUSG00000031778|ENSMUSG00000059248|ENSMUSG00000039953|ENSMUSG00000047215|ENSMUSG00000056602|ENSMUSG00000021794|ENSMUSG00000034892|ENSMUSG00000004951|ENSMUSG00000034891|ENSMUSG00000037152|…	http://amigo.geneontology.org/cgi-bin/amigo/term_details?term=GO:0044444
system development	GO:0048731	113	3652	5.86e-18	1.76e-15	ENSMUSG00000040249|ENSMUSG00000024073|ENSMUSG00000030357|ENSMUSG00000025855|ENSMUSG00000002957|ENSMUSG00000038894|ENSMUSG00000059003|ENSMUSG00000031778|ENSMUSG00000039953|ENSMUSG00000049313|ENSMUSG00000051391|ENSMUSG00000042453|ENSMUSG00000004951|ENSMUSG00000040761|ENSMUSG00000030209|ENSMUSG00000038248|ENSMUSG00000024042|ENSMUSG00000048078|ENSMUSG00000042182|ENSMUSG00000030683|ENSMUSG00000036427|…	http://amigo.geneontology.org/cgi-bin/amigo/term_details?term=GO:0048731
cell projection	GO:0042995	75	1815	6.76e-18	1.93e-15	ENSMUSG00000025190|ENSMUSG00000040249|ENSMUSG00000026131|ENSMUSG00000033585|ENSMUSG00000023915|ENSMUSG00000020716|ENSMUSG00000063077|ENSMUSG00000056258|ENSMUSG00000034891|ENSMUSG00000030357|ENSMUSG00000022892|ENSMUSG00000020428|ENSMUSG00000032589|ENSMUSG00000023805|ENSMUSG00000078816|ENSMUSG00000022454|ENSMUSG00000035864|ENSMUSG00000015837|ENSMUSG00000059003|ENSMUSG00000031778|ENSMUSG00000022443|…	http://amigo.geneontology.org/cgi-bin/amigo/term_details?term=GO:0042995
single-multicellular organism process	GO:0044707	136	4985	1.54e-17	4.17e-15	ENSMUSG00000032589|ENSMUSG00000040249|ENSMUSG00000024073|ENSMUSG00000030357|ENSMUSG00000025855|ENSMUSG00000002957|ENSMUSG00000038894|ENSMUSG00000059003|ENSMUSG00000031778|ENSMUSG00000039953|ENSMUSG00000049313|ENSMUSG00000056602|ENSMUSG00000042453|ENSMUSG00000004951|ENSMUSG00000040761|ENSMUSG00000020893|ENSMUSG00000030209|ENSMUSG00000038248|ENSMUSG00000024042|ENSMUSG00000048078|ENSMUSG00000075706|…	http://amigo.geneontology.org/cgi-bin/amigo/term_details?term=GO:0044707
multicellular organism development	GO:0007275	121	4147	1.94e-17	5e-15	ENSMUSG00000032589|ENSMUSG00000040249|ENSMUSG00000024073|ENSMUSG00000030357|ENSMUSG00000025855|ENSMUSG00000002957|ENSMUSG00000038894|ENSMUSG00000059003|ENSMUSG00000031778|ENSMUSG00000039953|ENSMUSG00000049313|ENSMUSG00000051391|ENSMUSG00000042453|ENSMUSG00000004951|ENSMUSG00000040761|ENSMUSG00000030209|ENSMUSG00000038248|ENSMUSG00000024042|ENSMUSG00000048078|ENSMUSG00000075706|ENSMUSG00000030683|…	http://amigo.geneontology.org/cgi-bin/amigo/term_details?term=GO:0007275
nervous system development	GO:0007399	74	1811	2.15e-17	5.28e-15	ENSMUSG00000059003|ENSMUSG00000040249|ENSMUSG00000020716|ENSMUSG00000026131|ENSMUSG00000033585|ENSMUSG00000028341|ENSMUSG00000027894|ENSMUSG00000042834|ENSMUSG00000021451|ENSMUSG00000047976|ENSMUSG00000049044|ENSMUSG00000056602|ENSMUSG00000031996|ENSMUSG00000026864|ENSMUSG00000038894|ENSMUSG00000026193|ENSMUSG00000035864|ENSMUSG00000055407|ENSMUSG00000017485|ENSMUSG00000031778|ENSMUSG00000005533|…	http://amigo.geneontology.org/cgi-bin/amigo/term_details?term=GO:0007399
somatodendritic compartment	GO:0036477	46	739	3.45e-17	8.11e-15	ENSMUSG00000040249|ENSMUSG00000020716|ENSMUSG00000030357|ENSMUSG00000049044|ENSMUSG00000030209|ENSMUSG00000032589|ENSMUSG00000022454|ENSMUSG00000056258|ENSMUSG00000059003|ENSMUSG00000005533|ENSMUSG00000018411|ENSMUSG00000034187|ENSMUSG00000034593|ENSMUSG00000049313|ENSMUSG00000026959|ENSMUSG00000022054|ENSMUSG00000096054|ENSMUSG00000023033|ENSMUSG00000042453|ENSMUSG00000017740|ENSMUSG00000034891|…	http://amigo.geneontology.org/cgi-bin/amigo/term_details?term=GO:0036477
cell junction	GO:0030054	59	1236	9.74e-17	2.2e-14	ENSMUSG00000040249|ENSMUSG00000026131|ENSMUSG00000027894|ENSMUSG00000020428|ENSMUSG00000032589|ENSMUSG00000035864|ENSMUSG00000026864|ENSMUSG00000022892|ENSMUSG00000022565|ENSMUSG00000059003|ENSMUSG00000023944|ENSMUSG00000022443|ENSMUSG00000025153|ENSMUSG00000039953|ENSMUSG00000034088|ENSMUSG00000047215|ENSMUSG00000032826|ENSMUSG00000032115|ENSMUSG00000051391|ENSMUSG00000054423|ENSMUSG00000024427|…	http://amigo.geneontology.org/cgi-bin/amigo/term_details?term=GO:0030054
anatomical structure development	GO:0048856	127	4582	1.13e-16	2.45e-14	ENSMUSG00000032589|ENSMUSG00000040249|ENSMUSG00000024073|ENSMUSG00000030357|ENSMUSG00000025855|ENSMUSG00000002957|ENSMUSG00000038894|ENSMUSG00000059003|ENSMUSG00000031778|ENSMUSG00000059248|ENSMUSG00000039953|ENSMUSG00000049313|ENSMUSG00000051391|ENSMUSG00000042453|ENSMUSG00000004951|ENSMUSG00000040761|ENSMUSG00000030209|ENSMUSG00000038248|ENSMUSG00000024042|ENSMUSG00000048078|ENSMUSG00000075706|…	http://amigo.geneontology.org/cgi-bin/amigo/term_details?term=GO:0048856
developmental process	GO:0032502	132	4896	1.75e-16	3.64e-14	ENSMUSG00000032589|ENSMUSG00000040249|ENSMUSG00000024073|ENSMUSG00000030357|ENSMUSG00000025855|ENSMUSG00000002957|ENSMUSG00000038894|ENSMUSG00000059003|ENSMUSG00000031778|ENSMUSG00000059248|ENSMUSG00000039953|ENSMUSG00000049313|ENSMUSG00000056602|ENSMUSG00000042453|ENSMUSG00000004951|ENSMUSG00000040761|ENSMUSG00000025261|ENSMUSG00000030209|ENSMUSG00000038248|ENSMUSG00000024042|ENSMUSG00000048078|…	http://amigo.geneontology.org/cgi-bin/amigo/term_details?term=GO:0032502
single-organism developmental process	GO:0044767	131	4847	2.04e-16	4.09e-14	ENSMUSG00000032589|ENSMUSG00000040249|ENSMUSG00000024073|ENSMUSG00000030357|ENSMUSG00000025855|ENSMUSG00000002957|ENSMUSG00000038894|ENSMUSG00000059003|ENSMUSG00000031778|ENSMUSG00000059248|ENSMUSG00000039953|ENSMUSG00000049313|ENSMUSG00000051391|ENSMUSG00000042453|ENSMUSG00000004951|ENSMUSG00000040761|ENSMUSG00000025261|ENSMUSG00000030209|ENSMUSG00000038248|ENSMUSG00000024042|ENSMUSG00000048078|…	http://amigo.geneontology.org/cgi-bin/amigo/term_details?term=GO:0044767
axon	GO:0030424	35	444	3.83e-16	7.41e-14	ENSMUSG00000020716|ENSMUSG00000030357|ENSMUSG00000032589|ENSMUSG00000023805|ENSMUSG00000035864|ENSMUSG00000022892|ENSMUSG00000056258|ENSMUSG00000059003|ENSMUSG00000005533|ENSMUSG00000018411|ENSMUSG00000034593|ENSMUSG00000029777|ENSMUSG00000026959|ENSMUSG00000022054|ENSMUSG00000023033|ENSMUSG00000042453|ENSMUSG00000049044|ENSMUSG00000034891|ENSMUSG00000061601|ENSMUSG00000004951|ENSMUSG00000030209|…	http://amigo.geneontology.org/cgi-bin/amigo/term_details?term=GO:0030424
multicellular organismal process	GO:0032501	141	5496	5.11e-16	9.55e-14	ENSMUSG00000032589|ENSMUSG00000040249|ENSMUSG00000024073|ENSMUSG00000030357|ENSMUSG00000025855|ENSMUSG00000002957|ENSMUSG00000038894|ENSMUSG00000059003|ENSMUSG00000031778|ENSMUSG00000039953|ENSMUSG00000049313|ENSMUSG00000056602|ENSMUSG00000042453|ENSMUSG00000004951|ENSMUSG00000040761|ENSMUSG00000020893|ENSMUSG00000030209|ENSMUSG00000038248|ENSMUSG00000024042|ENSMUSG00000048078|ENSMUSG00000075706|…	http://amigo.geneontology.org/cgi-bin/amigo/term_details?term=GO:0032501
localization	GO:0051179	128	4794	1.51e-15	2.72e-13	ENSMUSG00000040249|ENSMUSG00000030357|ENSMUSG00000023805|ENSMUSG00000031770|ENSMUSG00000054423|ENSMUSG00000038894|ENSMUSG00000059003|ENSMUSG00000031778|ENSMUSG00000034088|ENSMUSG00000051391|ENSMUSG00000021794|ENSMUSG00000042453|ENSMUSG00000004951|ENSMUSG00000037152|ENSMUSG00000020893|ENSMUSG00000025261|ENSMUSG00000020428|ENSMUSG00000032826|ENSMUSG00000024042|ENSMUSG00000045038|ENSMUSG00000038690|…	http://amigo.geneontology.org/cgi-bin/amigo/term_details?term=GO:0051179
single organism signaling	GO:0044700	120	4356	2.15e-15	3.76e-13	ENSMUSG00000040249|ENSMUSG00000024073|ENSMUSG00000030357|ENSMUSG00000031770|ENSMUSG00000019947|ENSMUSG00000038894|ENSMUSG00000059003|ENSMUSG00000031778|ENSMUSG00000039953|ENSMUSG00000049313|ENSMUSG00000051391|ENSMUSG00000021794|ENSMUSG00000042453|ENSMUSG00000004951|ENSMUSG00000040761|ENSMUSG00000034891|ENSMUSG00000020893|ENSMUSG00000053192|ENSMUSG00000030209|ENSMUSG00000032826|ENSMUSG00000024042|…	http://amigo.geneontology.org/cgi-bin/amigo/term_details?term=GO:0044700
signaling	GO:0023052	120	4363	2.42e-15	4.1e-13	ENSMUSG00000040249|ENSMUSG00000024073|ENSMUSG00000030357|ENSMUSG00000031770|ENSMUSG00000019947|ENSMUSG00000038894|ENSMUSG00000059003|ENSMUSG00000031778|ENSMUSG00000039953|ENSMUSG00000049313|ENSMUSG00000051391|ENSMUSG00000021794|ENSMUSG00000042453|ENSMUSG00000004951|ENSMUSG00000040761|ENSMUSG00000034891|ENSMUSG00000020893|ENSMUSG00000053192|ENSMUSG00000030209|ENSMUSG00000032826|ENSMUSG00000024042|…	http://amigo.geneontology.org/cgi-bin/amigo/term_details?term=GO:0023052
membrane	GO:0016020	166	7188	2.93e-15	4.81e-13	ENSMUSG00000040249|ENSMUSG00000024073|ENSMUSG00000006575|ENSMUSG00000030357|ENSMUSG00000025855|ENSMUSG00000023805|ENSMUSG00000031770|ENSMUSG00000041313|ENSMUSG00000038894|ENSMUSG00000022565|ENSMUSG00000059003|ENSMUSG00000031778|ENSMUSG00000039953|ENSMUSG00000049313|ENSMUSG00000047215|ENSMUSG00000051391|ENSMUSG00000021794|ENSMUSG00000004951|ENSMUSG00000037152|ENSMUSG00000025261|ENSMUSG00000030209|…	http://amigo.geneontology.org/cgi-bin/amigo/term_details?term=GO:0016020
response to stimulus	GO:0050896	150	6172	3.22e-15	5.13e-13	ENSMUSG00000040249|ENSMUSG00000024073|ENSMUSG00000030357|ENSMUSG00000031770|ENSMUSG00000038894|ENSMUSG00000022565|ENSMUSG00000059003|ENSMUSG00000031778|ENSMUSG00000049313|ENSMUSG00000051391|ENSMUSG00000021794|ENSMUSG00000042453|ENSMUSG00000004951|ENSMUSG00000040761|ENSMUSG00000020893|ENSMUSG00000053192|ENSMUSG00000025261|ENSMUSG00000030209|ENSMUSG00000032826|ENSMUSG00000024042|ENSMUSG00000048078|…	http://amigo.geneontology.org/cgi-bin/amigo/term_details?term=GO:0050896
cell communication	GO:0007154	120	4414	5.68e-15	8.79e-13	ENSMUSG00000040249|ENSMUSG00000024073|ENSMUSG00000030357|ENSMUSG00000031770|ENSMUSG00000019947|ENSMUSG00000038894|ENSMUSG00000059003|ENSMUSG00000031778|ENSMUSG00000039953|ENSMUSG00000049313|ENSMUSG00000051391|ENSMUSG00000021794|ENSMUSG00000042453|ENSMUSG00000004951|ENSMUSG00000040761|ENSMUSG00000034891|ENSMUSG00000020893|ENSMUSG00000053192|ENSMUSG00000030209|ENSMUSG00000032826|ENSMUSG00000024042|…	http://amigo.geneontology.org/cgi-bin/amigo/term_details?term=GO:0007154
synapse part	GO:0044456	37	552	6.37e-15	9.59e-13	ENSMUSG00000026131|ENSMUSG00000020716|ENSMUSG00000020428|ENSMUSG00000032589|ENSMUSG00000022892|ENSMUSG00000035864|ENSMUSG00000059003|ENSMUSG00000096054|ENSMUSG00000018411|ENSMUSG00000039953|ENSMUSG00000034593|ENSMUSG00000027894|ENSMUSG00000022054|ENSMUSG00000004951|ENSMUSG00000034891|ENSMUSG00000022285|ENSMUSG00000027254|ENSMUSG00000049044|ENSMUSG00000030209|ENSMUSG00000069601|ENSMUSG00000032826|…	http://amigo.geneontology.org/cgi-bin/amigo/term_details?term=GO:0044456
regulation of cellular process	GO:0050794	175	7861	8.02e-15	1.17e-12	ENSMUSG00000040249|ENSMUSG00000024073|ENSMUSG00000006575|ENSMUSG00000030357|ENSMUSG00000025855|ENSMUSG00000022263|ENSMUSG00000031770|ENSMUSG00000019947|ENSMUSG00000038894|ENSMUSG00000059003|ENSMUSG00000031778|ENSMUSG00000059248|ENSMUSG00000042453|ENSMUSG00000039953|ENSMUSG00000049313|ENSMUSG00000056602|ENSMUSG00000021794|ENSMUSG00000034892|ENSMUSG00000004951|ENSMUSG00000040761|ENSMUSG00000034891|…	http://amigo.geneontology.org/cgi-bin/amigo/term_details?term=GO:0050794
nucleus	GO:0005634	138	5509	9.76e-15	1.39e-12	ENSMUSG00000040249|ENSMUSG00000030357|ENSMUSG00000028341|ENSMUSG00000039953|ENSMUSG00000034088|ENSMUSG00000047215|ENSMUSG00000004951|ENSMUSG00000040761|ENSMUSG00000034891|ENSMUSG00000025264|ENSMUSG00000020893|ENSMUSG00000053192|ENSMUSG00000025261|ENSMUSG00000039501|ENSMUSG00000038248|ENSMUSG00000024042|ENSMUSG00000038244|ENSMUSG00000042182|ENSMUSG00000075706|ENSMUSG00000045038|ENSMUSG00000036427|…	http://amigo.geneontology.org/cgi-bin/amigo/term_details?term=GO:0005634
synapse	GO:0045202	42	726	1.01e-14	1.4e-12	ENSMUSG00000026131|ENSMUSG00000020716|ENSMUSG00000020428|ENSMUSG00000032589|ENSMUSG00000022892|ENSMUSG00000035864|ENSMUSG00000059003|ENSMUSG00000022443|ENSMUSG00000096054|ENSMUSG00000018411|ENSMUSG00000039953|ENSMUSG00000034593|ENSMUSG00000027894|ENSMUSG00000022054|ENSMUSG00000054423|ENSMUSG00000004951|ENSMUSG00000034891|ENSMUSG00000022285|ENSMUSG00000027254|ENSMUSG00000049044|ENSMUSG00000030302|…	http://amigo.geneontology.org/cgi-bin/amigo/term_details?term=GO:0045202
neuronal cell body	GO:0043025	36	537	1.51e-14	2.05e-12	ENSMUSG00000040249|ENSMUSG00000049313|ENSMUSG00000030357|ENSMUSG00000020428|ENSMUSG00000022054|ENSMUSG00000022454|ENSMUSG00000056258|ENSMUSG00000005533|ENSMUSG00000034593|ENSMUSG00000026959|ENSMUSG00000004951|ENSMUSG00000023033|ENSMUSG00000042453|ENSMUSG00000017740|ENSMUSG00000034891|ENSMUSG00000061601|ENSMUSG00000049044|ENSMUSG00000030302|ENSMUSG00000058153|ENSMUSG00000048978|ENSMUSG00000047976|…	http://amigo.geneontology.org/cgi-bin/amigo/term_details?term=GO:0043025
synaptic signaling	GO:0099536	34	488	3.03e-14	3.72e-12	ENSMUSG00000020716|ENSMUSG00000063077|ENSMUSG00000020428|ENSMUSG00000035864|ENSMUSG00000059003|ENSMUSG00000031778|ENSMUSG00000018411|ENSMUSG00000039953|ENSMUSG00000034593|ENSMUSG00000051391|ENSMUSG00000054423|ENSMUSG00000042453|ENSMUSG00000017740|ENSMUSG00000034891|ENSMUSG00000061601|ENSMUSG00000049044|ENSMUSG00000030302|ENSMUSG00000030209|ENSMUSG00000046876|ENSMUSG00000029467|ENSMUSG00000027296|…	http://amigo.geneontology.org/cgi-bin/amigo/term_details?term=GO:0099536
anterograde trans-synaptic signaling	GO:0098916	34	488	3.03e-14	3.72e-12	ENSMUSG00000020716|ENSMUSG00000063077|ENSMUSG00000020428|ENSMUSG00000035864|ENSMUSG00000059003|ENSMUSG00000031778|ENSMUSG00000018411|ENSMUSG00000039953|ENSMUSG00000034593|ENSMUSG00000051391|ENSMUSG00000054423|ENSMUSG00000042453|ENSMUSG00000017740|ENSMUSG00000034891|ENSMUSG00000061601|ENSMUSG00000049044|ENSMUSG00000030302|ENSMUSG00000030209|ENSMUSG00000046876|ENSMUSG00000029467|ENSMUSG00000027296|…	http://amigo.geneontology.org/cgi-bin/amigo/term_details?term=GO:0098916
trans-synaptic signaling	GO:0099537	34	488	3.03e-14	3.72e-12	ENSMUSG00000020716|ENSMUSG00000063077|ENSMUSG00000020428|ENSMUSG00000035864|ENSMUSG00000059003|ENSMUSG00000031778|ENSMUSG00000018411|ENSMUSG00000039953|ENSMUSG00000034593|ENSMUSG00000051391|ENSMUSG00000054423|ENSMUSG00000042453|ENSMUSG00000017740|ENSMUSG00000034891|ENSMUSG00000061601|ENSMUSG00000049044|ENSMUSG00000030302|ENSMUSG00000030209|ENSMUSG00000046876|ENSMUSG00000029467|ENSMUSG00000027296|…	http://amigo.geneontology.org/cgi-bin/amigo/term_details?term=GO:0099537
chemical synaptic transmission	GO:0007268	34	488	3.03e-14	3.72e-12	ENSMUSG00000020716|ENSMUSG00000063077|ENSMUSG00000020428|ENSMUSG00000035864|ENSMUSG00000059003|ENSMUSG00000031778|ENSMUSG00000018411|ENSMUSG00000039953|ENSMUSG00000034593|ENSMUSG00000051391|ENSMUSG00000054423|ENSMUSG00000042453|ENSMUSG00000017740|ENSMUSG00000034891|ENSMUSG00000061601|ENSMUSG00000049044|ENSMUSG00000030302|ENSMUSG00000030209|ENSMUSG00000046876|ENSMUSG00000029467|ENSMUSG00000027296|…	http://amigo.geneontology.org/cgi-bin/amigo/term_details?term=GO:0007268
regulation of biological process	GO:0050789	180	8311	3.23e-14	3.89e-12	ENSMUSG00000040249|ENSMUSG00000024073|ENSMUSG00000006575|ENSMUSG00000030357|ENSMUSG00000025855|ENSMUSG00000022263|ENSMUSG00000031770|ENSMUSG00000019947|ENSMUSG00000038894|ENSMUSG00000059003|ENSMUSG00000031778|ENSMUSG00000059248|ENSMUSG00000042453|ENSMUSG00000039953|ENSMUSG00000049313|ENSMUSG00000056602|ENSMUSG00000021794|ENSMUSG00000034892|ENSMUSG00000004951|ENSMUSG00000040761|ENSMUSG00000034891|…	http://amigo.geneontology.org/cgi-bin/amigo/term_details?term=GO:0050789
postsynapse	GO:0098794	30	373	3.36e-14	3.96e-12	ENSMUSG00000026131|ENSMUSG00000020716|ENSMUSG00000020428|ENSMUSG00000032589|ENSMUSG00000059003|ENSMUSG00000096054|ENSMUSG00000018411|ENSMUSG00000039953|ENSMUSG00000022054|ENSMUSG00000004951|ENSMUSG00000022285|ENSMUSG00000027254|ENSMUSG00000049044|ENSMUSG00000030209|ENSMUSG00000069601|ENSMUSG00000032826|ENSMUSG00000027296|ENSMUSG00000034187|ENSMUSG00000021373|ENSMUSG00000078816|ENSMUSG00000026959|…	http://amigo.geneontology.org/cgi-bin/amigo/term_details?term=GO:0098794
establishment of localization	GO:0051234	107	3794	3.64e-14	4.19e-12	ENSMUSG00000040249|ENSMUSG00000030357|ENSMUSG00000031770|ENSMUSG00000002957|ENSMUSG00000038894|ENSMUSG00000059003|ENSMUSG00000031778|ENSMUSG00000034088|ENSMUSG00000051391|ENSMUSG00000021794|ENSMUSG00000042453|ENSMUSG00000037152|ENSMUSG00000020893|ENSMUSG00000025261|ENSMUSG00000020428|ENSMUSG00000032826|ENSMUSG00000024042|ENSMUSG00000045038|ENSMUSG00000038690|ENSMUSG00000026959|ENSMUSG00000033419|…	http://amigo.geneontology.org/cgi-bin/amigo/term_details?term=GO:0051234
biological regulation	GO:0065007	186	8737	3.75e-14	4.23e-12	ENSMUSG00000040249|ENSMUSG00000024073|ENSMUSG00000006575|ENSMUSG00000030357|ENSMUSG00000025855|ENSMUSG00000022263|ENSMUSG00000031770|ENSMUSG00000019947|ENSMUSG00000038894|ENSMUSG00000059003|ENSMUSG00000031778|ENSMUSG00000059248|ENSMUSG00000042453|ENSMUSG00000039953|ENSMUSG00000049313|ENSMUSG00000056602|ENSMUSG00000021794|ENSMUSG00000034892|ENSMUSG00000004951|ENSMUSG00000040761|ENSMUSG00000034891|…	http://amigo.geneontology.org/cgi-bin/amigo/term_details?term=GO:0065007
cellular component organization	GO:0016043	125	4849	5.66e-14	6.25e-12	ENSMUSG00000040249|ENSMUSG00000024073|ENSMUSG00000030357|ENSMUSG00000023805|ENSMUSG00000028341|ENSMUSG00000026959|ENSMUSG00000022565|ENSMUSG00000059003|ENSMUSG00000031778|ENSMUSG00000059248|ENSMUSG00000039953|ENSMUSG00000049313|ENSMUSG00000056602|ENSMUSG00000042453|ENSMUSG00000004951|ENSMUSG00000034891|ENSMUSG00000020893|ENSMUSG00000053192|ENSMUSG00000025261|ENSMUSG00000030209|ENSMUSG00000032826|…	http://amigo.geneontology.org/cgi-bin/amigo/term_details?term=GO:0016043
response to chemical	GO:0042221	86	2710	6.34e-14	6.87e-12	ENSMUSG00000030357|ENSMUSG00000031770|ENSMUSG00000038894|ENSMUSG00000022565|ENSMUSG00000059003|ENSMUSG00000031778|ENSMUSG00000051391|ENSMUSG00000021794|ENSMUSG00000042453|ENSMUSG00000004951|ENSMUSG00000020893|ENSMUSG00000030209|ENSMUSG00000024042|ENSMUSG00000045038|ENSMUSG00000036427|ENSMUSG00000026959|ENSMUSG00000031765|ENSMUSG00000025217|ENSMUSG00000022255|ENSMUSG00000006920|ENSMUSG00000022769|…	http://amigo.geneontology.org/cgi-bin/amigo/term_details?term=GO:0042221
transport	GO:0006810	104	3666	6.9e-14	7.33e-12	ENSMUSG00000040249|ENSMUSG00000030357|ENSMUSG00000031770|ENSMUSG00000002957|ENSMUSG00000038894|ENSMUSG00000059003|ENSMUSG00000031778|ENSMUSG00000034088|ENSMUSG00000051391|ENSMUSG00000021794|ENSMUSG00000042453|ENSMUSG00000037152|ENSMUSG00000020893|ENSMUSG00000025261|ENSMUSG00000020428|ENSMUSG00000032826|ENSMUSG00000024042|ENSMUSG00000045038|ENSMUSG00000038690|ENSMUSG00000026959|ENSMUSG00000033419|…	http://amigo.geneontology.org/cgi-bin/amigo/term_details?term=GO:0006810
cellular component organization or biogenesis	GO:0071840	127	4990	7.96e-14	8.21e-12	ENSMUSG00000040249|ENSMUSG00000024073|ENSMUSG00000030357|ENSMUSG00000023805|ENSMUSG00000028341|ENSMUSG00000026959|ENSMUSG00000022565|ENSMUSG00000059003|ENSMUSG00000031778|ENSMUSG00000059248|ENSMUSG00000039953|ENSMUSG00000049313|ENSMUSG00000056602|ENSMUSG00000042453|ENSMUSG00000004951|ENSMUSG00000034891|ENSMUSG00000025264|ENSMUSG00000020893|ENSMUSG00000053192|ENSMUSG00000025261|ENSMUSG00000030209|…	http://amigo.geneontology.org/cgi-bin/amigo/term_details?term=GO:0071840
enzyme binding	GO:0019899	64	1674	9.58e-14	9.7e-12	ENSMUSG00000059003|ENSMUSG00000040249|ENSMUSG00000051586|ENSMUSG00000021373|ENSMUSG00000049313|ENSMUSG00000059970|ENSMUSG00000022892|ENSMUSG00000001930|ENSMUSG00000022263|ENSMUSG00000026864|ENSMUSG00000002957|ENSMUSG00000038894|ENSMUSG00000026193|ENSMUSG00000056258|ENSMUSG00000015837|ENSMUSG00000028410|ENSMUSG00000023944|ENSMUSG00000008348|ENSMUSG00000096054|ENSMUSG00000018411|ENSMUSG00000034187|…	http://amigo.geneontology.org/cgi-bin/amigo/term_details?term=GO:0019899
cell body	GO:0044297	37	607	9.99e-14	9.93e-12	ENSMUSG00000040249|ENSMUSG00000049313|ENSMUSG00000030357|ENSMUSG00000020428|ENSMUSG00000022054|ENSMUSG00000022454|ENSMUSG00000056258|ENSMUSG00000005533|ENSMUSG00000018411|ENSMUSG00000034593|ENSMUSG00000026959|ENSMUSG00000004951|ENSMUSG00000023033|ENSMUSG00000042453|ENSMUSG00000017740|ENSMUSG00000034891|ENSMUSG00000061601|ENSMUSG00000049044|ENSMUSG00000030302|ENSMUSG00000058153|ENSMUSG00000048978|…	http://amigo.geneontology.org/cgi-bin/amigo/term_details?term=GO:0044297
membrane-bounded vesicle	GO:0031988	87	2791	1.15e-13	1.13e-11	ENSMUSG00000040249|ENSMUSG00000030357|ENSMUSG00000068739|ENSMUSG00000002957|ENSMUSG00000062591|ENSMUSG00000022565|ENSMUSG00000059003|ENSMUSG00000039953|ENSMUSG00000051391|ENSMUSG00000034892|ENSMUSG00000004951|ENSMUSG00000040761|ENSMUSG00000025261|ENSMUSG00000030209|ENSMUSG00000075706|ENSMUSG00000036427|ENSMUSG00000038690|ENSMUSG00000026959|ENSMUSG00000033419|ENSMUSG00000000560|ENSMUSG00000025190|…	http://amigo.geneontology.org/cgi-bin/amigo/term_details?term=GO:0031988
regulation of biological quality	GO:0065008	88	2849	1.31e-13	1.26e-11	ENSMUSG00000053192|ENSMUSG00000031770|ENSMUSG00000038894|ENSMUSG00000059003|ENSMUSG00000031778|ENSMUSG00000039953|ENSMUSG00000049313|ENSMUSG00000051391|ENSMUSG00000021794|ENSMUSG00000042453|ENSMUSG00000004951|ENSMUSG00000030209|ENSMUSG00000032826|ENSMUSG00000045038|ENSMUSG00000036427|ENSMUSG00000026959|ENSMUSG00000052698|ENSMUSG00000031765|ENSMUSG00000000560|ENSMUSG00000025190|ENSMUSG00000033419|…	http://amigo.geneontology.org/cgi-bin/amigo/term_details?term=GO:0065008
cellular response to stimulus	GO:0051716	127	5047	1.84e-13	1.74e-11	ENSMUSG00000040249|ENSMUSG00000024073|ENSMUSG00000030357|ENSMUSG00000031770|ENSMUSG00000038894|ENSMUSG00000059003|ENSMUSG00000031778|ENSMUSG00000049313|ENSMUSG00000051391|ENSMUSG00000042453|ENSMUSG00000004951|ENSMUSG00000040761|ENSMUSG00000020893|ENSMUSG00000053192|ENSMUSG00000025261|ENSMUSG00000030209|ENSMUSG00000032826|ENSMUSG00000024042|ENSMUSG00000048078|ENSMUSG00000042182|ENSMUSG00000045038|…	http://amigo.geneontology.org/cgi-bin/amigo/term_details?term=GO:0051716
vesicle	GO:0031982	92	3080	2.01e-13	1.86e-11	ENSMUSG00000040249|ENSMUSG00000030357|ENSMUSG00000068739|ENSMUSG00000002957|ENSMUSG00000062591|ENSMUSG00000022565|ENSMUSG00000059003|ENSMUSG00000039953|ENSMUSG00000051391|ENSMUSG00000034892|ENSMUSG00000004951|ENSMUSG00000040761|ENSMUSG00000025261|ENSMUSG00000030209|ENSMUSG00000075706|ENSMUSG00000036427|ENSMUSG00000038690|ENSMUSG00000026959|ENSMUSG00000033419|ENSMUSG00000000560|ENSMUSG00000025190|…	http://amigo.geneontology.org/cgi-bin/amigo/term_details?term=GO:0031982
excitatory synapse	GO:0060076	22	206	5.76e-13	5.24e-11	ENSMUSG00000052727|ENSMUSG00000020716|ENSMUSG00000032589|ENSMUSG00000035864|ENSMUSG00000059003|ENSMUSG00000018411|ENSMUSG00000039953|ENSMUSG00000022054|ENSMUSG00000049044|ENSMUSG00000022285|ENSMUSG00000027254|ENSMUSG00000030209|ENSMUSG00000032826|ENSMUSG00000034187|ENSMUSG00000021373|ENSMUSG00000078816|ENSMUSG00000026959|ENSMUSG00000033419|ENSMUSG00000061601|ENSMUSG00000026131|ENSMUSG00000032060|…	http://amigo.geneontology.org/cgi-bin/amigo/term_details?term=GO:0060076
poly(A) RNA binding	GO:0044822	46	979	6.16e-13	5.51e-11	ENSMUSG00000040249|ENSMUSG00000027951|ENSMUSG00000002052|ENSMUSG00000039804|ENSMUSG00000022565|ENSMUSG00000030655|ENSMUSG00000023944|ENSMUSG00000008348|ENSMUSG00000025153|ENSMUSG00000070436|ENSMUSG00000071659|ENSMUSG00000045983|ENSMUSG00000034593|ENSMUSG00000034088|ENSMUSG00000027763|ENSMUSG00000026356|ENSMUSG00000045193|ENSMUSG00000051391|ENSMUSG00000040383|ENSMUSG00000022443|ENSMUSG00000096054|…	http://amigo.geneontology.org/cgi-bin/amigo/term_details?term=GO:0044822
dendrite	GO:0030425	32	495	1.2e-12	1.05e-10	ENSMUSG00000040249|ENSMUSG00000020716|ENSMUSG00000020428|ENSMUSG00000032589|ENSMUSG00000026959|ENSMUSG00000056258|ENSMUSG00000059003|ENSMUSG00000096054|ENSMUSG00000018411|ENSMUSG00000034187|ENSMUSG00000004951|ENSMUSG00000023033|ENSMUSG00000042453|ENSMUSG00000017740|ENSMUSG00000061601|ENSMUSG00000049044|ENSMUSG00000030302|ENSMUSG00000030209|ENSMUSG00000069601|ENSMUSG00000047976|ENSMUSG00000027296|…	http://amigo.geneontology.org/cgi-bin/amigo/term_details?term=GO:0030425
neurogenesis	GO:0022008	54	1371	3.85e-12	3.34e-10	ENSMUSG00000059003|ENSMUSG00000042834|ENSMUSG00000026131|ENSMUSG00000033585|ENSMUSG00000020716|ENSMUSG00000040249|ENSMUSG00000021451|ENSMUSG00000055407|ENSMUSG00000056602|ENSMUSG00000028341|ENSMUSG00000026193|ENSMUSG00000035864|ENSMUSG00000017485|ENSMUSG00000031778|ENSMUSG00000005533|ENSMUSG00000006711|ENSMUSG00000018411|ENSMUSG00000030020|ENSMUSG00000049313|ENSMUSG00000026959|ENSMUSG00000051391|…	http://amigo.geneontology.org/cgi-bin/amigo/term_details?term=GO:0022008
postsynaptic specialization	GO:0099572	20	187	6.51e-12	5.46e-10	ENSMUSG00000026959|ENSMUSG00000018411|ENSMUSG00000030209|ENSMUSG00000039953|ENSMUSG00000020716|ENSMUSG00000032826|ENSMUSG00000027254|ENSMUSG00000026131|ENSMUSG00000022054|ENSMUSG00000032589|ENSMUSG00000034187|ENSMUSG00000032060|ENSMUSG00000021373|ENSMUSG00000015656|ENSMUSG00000078816|ENSMUSG00000022285|ENSMUSG00000059003|ENSMUSG00000061601|ENSMUSG00000033419|ENSMUSG00000052727	http://amigo.geneontology.org/cgi-bin/amigo/term_details?term=GO:0099572
postsynaptic density	GO:0014069	20	187	6.51e-12	5.46e-10	ENSMUSG00000026959|ENSMUSG00000018411|ENSMUSG00000030209|ENSMUSG00000039953|ENSMUSG00000020716|ENSMUSG00000032826|ENSMUSG00000027254|ENSMUSG00000026131|ENSMUSG00000022054|ENSMUSG00000032589|ENSMUSG00000034187|ENSMUSG00000032060|ENSMUSG00000021373|ENSMUSG00000015656|ENSMUSG00000078816|ENSMUSG00000022285|ENSMUSG00000059003|ENSMUSG00000061601|ENSMUSG00000033419|ENSMUSG00000052727	http://amigo.geneontology.org/cgi-bin/amigo/term_details?term=GO:0014069
extracellular exosome	GO:0070062	72	2269	1.28e-11	1.06e-09	ENSMUSG00000051853|ENSMUSG00000022892|ENSMUSG00000022285|ENSMUSG00000049313|ENSMUSG00000059970|ENSMUSG00000030357|ENSMUSG00000068739|ENSMUSG00000001930|ENSMUSG00000031996|ENSMUSG00000026864|ENSMUSG00000026193|ENSMUSG00000022565|ENSMUSG00000015837|ENSMUSG00000028410|ENSMUSG00000023944|ENSMUSG00000008348|ENSMUSG00000025153|ENSMUSG00000025487|ENSMUSG00000039953|ENSMUSG00000009863|ENSMUSG00000029777|…	http://amigo.geneontology.org/cgi-bin/amigo/term_details?term=GO:0070062
extracellular vesicle	GO:1903561	72	2281	1.62e-11	1.32e-09	ENSMUSG00000051853|ENSMUSG00000022892|ENSMUSG00000022285|ENSMUSG00000049313|ENSMUSG00000059970|ENSMUSG00000030357|ENSMUSG00000068739|ENSMUSG00000001930|ENSMUSG00000031996|ENSMUSG00000026864|ENSMUSG00000026193|ENSMUSG00000022565|ENSMUSG00000015837|ENSMUSG00000028410|ENSMUSG00000023944|ENSMUSG00000008348|ENSMUSG00000025153|ENSMUSG00000025487|ENSMUSG00000039953|ENSMUSG00000009863|ENSMUSG00000029777|…	http://amigo.geneontology.org/cgi-bin/amigo/term_details?term=GO:1903561
extracellular organelle	GO:0043230	72	2285	1.76e-11	1.41e-09	ENSMUSG00000051853|ENSMUSG00000022892|ENSMUSG00000022285|ENSMUSG00000049313|ENSMUSG00000059970|ENSMUSG00000030357|ENSMUSG00000068739|ENSMUSG00000001930|ENSMUSG00000031996|ENSMUSG00000026864|ENSMUSG00000026193|ENSMUSG00000022565|ENSMUSG00000015837|ENSMUSG00000028410|ENSMUSG00000023944|ENSMUSG00000008348|ENSMUSG00000025153|ENSMUSG00000025487|ENSMUSG00000039953|ENSMUSG00000009863|ENSMUSG00000029777|…	http://amigo.geneontology.org/cgi-bin/amigo/term_details?term=GO:0043230
organelle part	GO:0044422	129	5517	2.13e-11	1.68e-09	ENSMUSG00000040249|ENSMUSG00000024073|ENSMUSG00000030357|ENSMUSG00000023805|ENSMUSG00000031770|ENSMUSG00000059248|ENSMUSG00000047215|ENSMUSG00000021794|ENSMUSG00000034892|ENSMUSG00000004951|ENSMUSG00000040761|ENSMUSG00000034891|ENSMUSG00000037152|ENSMUSG00000025261|ENSMUSG00000030209|ENSMUSG00000032826|ENSMUSG00000075706|ENSMUSG00000045038|ENSMUSG00000036427|ENSMUSG00000038690|ENSMUSG00000062591|…	http://amigo.geneontology.org/cgi-bin/amigo/term_details?term=GO:0044422
cellular localization	GO:0051641	64	1919	3.12e-11	2.43e-09	ENSMUSG00000047976|ENSMUSG00000052727|ENSMUSG00000004961|ENSMUSG00000020716|ENSMUSG00000063077|ENSMUSG00000022892|ENSMUSG00000002052|ENSMUSG00000022054|ENSMUSG00000023805|ENSMUSG00000031770|ENSMUSG00000002957|ENSMUSG00000028341|ENSMUSG00000055407|ENSMUSG00000035864|ENSMUSG00000028410|ENSMUSG00000023944|ENSMUSG00000022443|ENSMUSG00000096054|ENSMUSG00000042453|ENSMUSG00000018411|ENSMUSG00000034187|…	http://amigo.geneontology.org/cgi-bin/amigo/term_details?term=GO:0051641
generation of neurons	GO:0048699	50	1283	3.91e-11	3.01e-09	ENSMUSG00000042834|ENSMUSG00000026131|ENSMUSG00000033585|ENSMUSG00000020716|ENSMUSG00000040249|ENSMUSG00000021451|ENSMUSG00000055407|ENSMUSG00000056602|ENSMUSG00000028341|ENSMUSG00000026193|ENSMUSG00000035864|ENSMUSG00000017485|ENSMUSG00000031778|ENSMUSG00000005533|ENSMUSG00000006711|ENSMUSG00000018411|ENSMUSG00000030020|ENSMUSG00000049313|ENSMUSG00000026959|ENSMUSG00000051391|ENSMUSG00000050071|…	http://amigo.geneontology.org/cgi-bin/amigo/term_details?term=GO:0048699
axon part	GO:0033267	21	236	4.69e-11	3.55e-09	ENSMUSG00000026442|ENSMUSG00000018411|ENSMUSG00000030209|ENSMUSG00000059003|ENSMUSG00000069601|ENSMUSG00000026959|ENSMUSG00000047976|ENSMUSG00000025190|ENSMUSG00000030357|ENSMUSG00000052727|ENSMUSG00000034891|ENSMUSG00000023805|ENSMUSG00000056258|ENSMUSG00000023033|ENSMUSG00000049044|ENSMUSG00000015656|ENSMUSG00000035864|ENSMUSG00000062591|ENSMUSG00000022892|ENSMUSG00000061601|ENSMUSG00000033419	http://amigo.geneontology.org/cgi-bin/amigo/term_details?term=GO:0033267
organic cyclic compound binding	GO:0097159	113	4620	5.59e-11	4.18e-09	ENSMUSG00000040249|ENSMUSG00000030357|ENSMUSG00000068739|ENSMUSG00000025855|ENSMUSG00000023805|ENSMUSG00000028341|ENSMUSG00000022565|ENSMUSG00000059248|ENSMUSG00000034088|ENSMUSG00000047215|ENSMUSG00000051391|ENSMUSG00000021794|ENSMUSG00000004951|ENSMUSG00000040761|ENSMUSG00000020893|ENSMUSG00000025261|ENSMUSG00000039501|ENSMUSG00000024042|ENSMUSG00000038244|ENSMUSG00000045038|ENSMUSG00000062591|…	http://amigo.geneontology.org/cgi-bin/amigo/term_details?term=GO:0097159
RNA binding	GO:0003723	51	1342	5.78e-11	4.26e-09	ENSMUSG00000040249|ENSMUSG00000018707|ENSMUSG00000030357|ENSMUSG00000002052|ENSMUSG00000023805|ENSMUSG00000001383|ENSMUSG00000039804|ENSMUSG00000022565|ENSMUSG00000030655|ENSMUSG00000023944|ENSMUSG00000008348|ENSMUSG00000025153|ENSMUSG00000070436|ENSMUSG00000071659|ENSMUSG00000045983|ENSMUSG00000034593|ENSMUSG00000034088|ENSMUSG00000027763|ENSMUSG00000026356|ENSMUSG00000045193|ENSMUSG00000051391|…	http://amigo.geneontology.org/cgi-bin/amigo/term_details?term=GO:0003723
cell periphery	GO:0071944	99	3841	9.51e-11	6.91e-09	ENSMUSG00000040249|ENSMUSG00000006575|ENSMUSG00000025855|ENSMUSG00000023805|ENSMUSG00000002957|ENSMUSG00000038894|ENSMUSG00000022565|ENSMUSG00000059003|ENSMUSG00000031778|ENSMUSG00000059248|ENSMUSG00000039953|ENSMUSG00000056602|ENSMUSG00000004951|ENSMUSG00000030209|ENSMUSG00000032826|ENSMUSG00000048078|ENSMUSG00000030683|ENSMUSG00000036427|ENSMUSG00000026959|ENSMUSG00000052698|ENSMUSG00000033419|…	http://amigo.geneontology.org/cgi-bin/amigo/term_details?term=GO:0071944
cellular response to chemical stimulus	GO:0070887	62	1883	1.13e-10	8.09e-09	ENSMUSG00000059003|ENSMUSG00000042834|ENSMUSG00000033585|ENSMUSG00000039804|ENSMUSG00000027951|ENSMUSG00000030357|ENSMUSG00000022892|ENSMUSG00000024042|ENSMUSG00000025217|ENSMUSG00000056258|ENSMUSG00000031770|ENSMUSG00000022255|ENSMUSG00000038894|ENSMUSG00000026193|ENSMUSG00000035864|ENSMUSG00000028341|ENSMUSG00000028410|ENSMUSG00000031778|ENSMUSG00000005533|ENSMUSG00000018411|ENSMUSG00000004207|…	http://amigo.geneontology.org/cgi-bin/amigo/term_details?term=GO:0070887
endomembrane system	GO:0012505	85	3085	1.42e-10	1e-08	ENSMUSG00000059003|ENSMUSG00000040249|ENSMUSG00000030209|ENSMUSG00000027894|ENSMUSG00000027963|ENSMUSG00000034891|ENSMUSG00000030357|ENSMUSG00000022892|ENSMUSG00000051853|ENSMUSG00000001930|ENSMUSG00000032589|ENSMUSG00000045038|ENSMUSG00000031770|ENSMUSG00000002957|ENSMUSG00000055407|ENSMUSG00000035864|ENSMUSG00000026959|ENSMUSG00000015837|ENSMUSG00000028410|ENSMUSG00000029777|ENSMUSG00000025153|…	http://amigo.geneontology.org/cgi-bin/amigo/term_details?term=GO:0012505
myelin sheath	GO:0043209	19	200	1.44e-10	1e-08	ENSMUSG00000026442|ENSMUSG00000034187|ENSMUSG00000059970|ENSMUSG00000030884|ENSMUSG00000015656|ENSMUSG00000051391|ENSMUSG00000024966|ENSMUSG00000034336|ENSMUSG00000022658|ENSMUSG00000041697|ENSMUSG00000026864|ENSMUSG00000032060|ENSMUSG00000036427|ENSMUSG00000039542|ENSMUSG00000062591|ENSMUSG00000058135|ENSMUSG00000037625|ENSMUSG00000008348|ENSMUSG00000022054	http://amigo.geneontology.org/cgi-bin/amigo/term_details?term=GO:0043209
regulation of cell communication	GO:0010646	72	2398	1.49e-10	1.03e-08	ENSMUSG00000059003|ENSMUSG00000040249|ENSMUSG00000049313|ENSMUSG00000039804|ENSMUSG00000020716|ENSMUSG00000042834|ENSMUSG00000021451|ENSMUSG00000053192|ENSMUSG00000022892|ENSMUSG00000030209|ENSMUSG00000022263|ENSMUSG00000042182|ENSMUSG00000031996|ENSMUSG00000031770|ENSMUSG00000022255|ENSMUSG00000038894|ENSMUSG00000026193|ENSMUSG00000035864|ENSMUSG00000026959|ENSMUSG00000015837|ENSMUSG00000028410|…	http://amigo.geneontology.org/cgi-bin/amigo/term_details?term=GO:0010646
extracellular region part	GO:0044421	86	3151	1.7e-10	1.16e-08	ENSMUSG00000030357|ENSMUSG00000068739|ENSMUSG00000022565|ENSMUSG00000031778|ENSMUSG00000039953|ENSMUSG00000034088|ENSMUSG00000047215|ENSMUSG00000051391|ENSMUSG00000042453|ENSMUSG00000004951|ENSMUSG00000040761|ENSMUSG00000025261|ENSMUSG00000075706|ENSMUSG00000036427|ENSMUSG00000038690|ENSMUSG00000062591|ENSMUSG00000025190|ENSMUSG00000034336|ENSMUSG00000026426|ENSMUSG00000015656|ENSMUSG00000032301|…	http://amigo.geneontology.org/cgi-bin/amigo/term_details?term=GO:0044421
regulation of signaling	GO:0023051	72	2417	2.1e-10	1.41e-08	ENSMUSG00000059003|ENSMUSG00000040249|ENSMUSG00000049313|ENSMUSG00000039804|ENSMUSG00000020716|ENSMUSG00000042834|ENSMUSG00000021451|ENSMUSG00000053192|ENSMUSG00000022892|ENSMUSG00000030209|ENSMUSG00000022263|ENSMUSG00000042182|ENSMUSG00000031996|ENSMUSG00000031770|ENSMUSG00000022255|ENSMUSG00000038894|ENSMUSG00000026193|ENSMUSG00000035864|ENSMUSG00000026959|ENSMUSG00000015837|ENSMUSG00000028410|…	http://amigo.geneontology.org/cgi-bin/amigo/term_details?term=GO:0023051
heterocyclic compound binding	GO:1901363	110	4550	2.36e-10	1.57e-08	ENSMUSG00000040249|ENSMUSG00000030357|ENSMUSG00000068739|ENSMUSG00000025855|ENSMUSG00000023805|ENSMUSG00000028341|ENSMUSG00000022565|ENSMUSG00000059248|ENSMUSG00000034088|ENSMUSG00000047215|ENSMUSG00000051391|ENSMUSG00000021794|ENSMUSG00000004951|ENSMUSG00000040761|ENSMUSG00000020893|ENSMUSG00000025261|ENSMUSG00000039501|ENSMUSG00000024042|ENSMUSG00000038244|ENSMUSG00000045038|ENSMUSG00000062591|…	http://amigo.geneontology.org/cgi-bin/amigo/term_details?term=GO:1901363
anchoring junction	GO:0070161	31	585	3.08e-10	2.02e-08	ENSMUSG00000040249|ENSMUSG00000026864|ENSMUSG00000022565|ENSMUSG00000023944|ENSMUSG00000022443|ENSMUSG00000059248|ENSMUSG00000045983|ENSMUSG00000034088|ENSMUSG00000047215|ENSMUSG00000032115|ENSMUSG00000051391|ENSMUSG00000024427|ENSMUSG00000020048|ENSMUSG00000004951|ENSMUSG00000034994|ENSMUSG00000003814|ENSMUSG00000034892|ENSMUSG00000040459|ENSMUSG00000021282|ENSMUSG00000045095|ENSMUSG00000001924|…	http://amigo.geneontology.org/cgi-bin/amigo/term_details?term=GO:0070161
cell adhesion molecule binding	GO:0050839	25	384	3.37e-10	2.19e-08	ENSMUSG00000001930|ENSMUSG00000026864|ENSMUSG00000026193|ENSMUSG00000022565|ENSMUSG00000059003|ENSMUSG00000031778|ENSMUSG00000022443|ENSMUSG00000059248|ENSMUSG00000045983|ENSMUSG00000034088|ENSMUSG00000023944|ENSMUSG00000025153|ENSMUSG00000034994|ENSMUSG00000003814|ENSMUSG00000022285|ENSMUSG00000040459|ENSMUSG00000021282|ENSMUSG00000030209|ENSMUSG00000048078|ENSMUSG00000069601|ENSMUSG00000016150|…	http://amigo.geneontology.org/cgi-bin/amigo/term_details?term=GO:0050839
cell-cell signaling	GO:0007267	44	1108	3.83e-10	2.46e-08	ENSMUSG00000040249|ENSMUSG00000004961|ENSMUSG00000020716|ENSMUSG00000063077|ENSMUSG00000020428|ENSMUSG00000038894|ENSMUSG00000026959|ENSMUSG00000035864|ENSMUSG00000059003|ENSMUSG00000031778|ENSMUSG00000018411|ENSMUSG00000039953|ENSMUSG00000034593|ENSMUSG00000051391|ENSMUSG00000054423|ENSMUSG00000021794|ENSMUSG00000042453|ENSMUSG00000017740|ENSMUSG00000034891|ENSMUSG00000022285|ENSMUSG00000061601|…	http://amigo.geneontology.org/cgi-bin/amigo/term_details?term=GO:0007267
cell development	GO:0048468	60	1848	4.07e-10	2.58e-08	ENSMUSG00000042834|ENSMUSG00000052727|ENSMUSG00000033585|ENSMUSG00000020716|ENSMUSG00000040249|ENSMUSG00000059970|ENSMUSG00000021451|ENSMUSG00000055407|ENSMUSG00000056602|ENSMUSG00000028341|ENSMUSG00000026193|ENSMUSG00000035864|ENSMUSG00000017485|ENSMUSG00000031778|ENSMUSG00000022443|ENSMUSG00000005533|ENSMUSG00000006711|ENSMUSG00000018411|ENSMUSG00000030020|ENSMUSG00000049313|ENSMUSG00000026959|…	http://amigo.geneontology.org/cgi-bin/amigo/term_details?term=GO:0048468
regulation of localization	GO:0032879	67	2199	4.23e-10	2.65e-08	ENSMUSG00000040249|ENSMUSG00000047976|ENSMUSG00000004961|ENSMUSG00000020716|ENSMUSG00000059970|ENSMUSG00000021451|ENSMUSG00000020577|ENSMUSG00000002052|ENSMUSG00000078816|ENSMUSG00000026864|ENSMUSG00000038894|ENSMUSG00000026193|ENSMUSG00000035864|ENSMUSG00000056258|ENSMUSG00000028410|ENSMUSG00000031778|ENSMUSG00000005533|ENSMUSG00000018411|ENSMUSG00000034187|ENSMUSG00000033004|ENSMUSG00000049313|…	http://amigo.geneontology.org/cgi-bin/amigo/term_details?term=GO:0032879
signal transduction	GO:0007165	100	4022	5.35e-10	3.31e-08	ENSMUSG00000040249|ENSMUSG00000024073|ENSMUSG00000030357|ENSMUSG00000031770|ENSMUSG00000038894|ENSMUSG00000059003|ENSMUSG00000031778|ENSMUSG00000049313|ENSMUSG00000042453|ENSMUSG00000004951|ENSMUSG00000040761|ENSMUSG00000020893|ENSMUSG00000053192|ENSMUSG00000030209|ENSMUSG00000032826|ENSMUSG00000024042|ENSMUSG00000048078|ENSMUSG00000042182|ENSMUSG00000045038|ENSMUSG00000026959|ENSMUSG00000031765|…	http://amigo.geneontology.org/cgi-bin/amigo/term_details?term=GO:0007165
regulation of transport	GO:0051049	54	1578	5.97e-10	3.65e-08	ENSMUSG00000040249|ENSMUSG00000004961|ENSMUSG00000020716|ENSMUSG00000059970|ENSMUSG00000020577|ENSMUSG00000002052|ENSMUSG00000056258|ENSMUSG00000038894|ENSMUSG00000026193|ENSMUSG00000035864|ENSMUSG00000028341|ENSMUSG00000028410|ENSMUSG00000031778|ENSMUSG00000096054|ENSMUSG00000018411|ENSMUSG00000034187|ENSMUSG00000034593|ENSMUSG00000049313|ENSMUSG00000023944|ENSMUSG00000054423|ENSMUSG00000023033|…	http://amigo.geneontology.org/cgi-bin/amigo/term_details?term=GO:0051049
establishment of localization in cell	GO:0051649	51	1439	6.11e-10	3.7e-08	ENSMUSG00000052727|ENSMUSG00000004961|ENSMUSG00000020716|ENSMUSG00000063077|ENSMUSG00000002052|ENSMUSG00000022054|ENSMUSG00000031770|ENSMUSG00000002957|ENSMUSG00000028341|ENSMUSG00000022892|ENSMUSG00000035864|ENSMUSG00000023944|ENSMUSG00000022443|ENSMUSG00000096054|ENSMUSG00000018411|ENSMUSG00000034187|ENSMUSG00000034593|ENSMUSG00000029020|ENSMUSG00000025777|ENSMUSG00000032115|ENSMUSG00000051391|…	http://amigo.geneontology.org/cgi-bin/amigo/term_details?term=GO:0051649
adherens junction	GO:0005912	30	568	6.51e-10	3.9e-08	ENSMUSG00000040249|ENSMUSG00000026864|ENSMUSG00000022565|ENSMUSG00000023944|ENSMUSG00000022443|ENSMUSG00000059248|ENSMUSG00000045983|ENSMUSG00000034088|ENSMUSG00000047215|ENSMUSG00000032115|ENSMUSG00000051391|ENSMUSG00000024427|ENSMUSG00000034892|ENSMUSG00000004951|ENSMUSG00000034994|ENSMUSG00000003814|ENSMUSG00000020048|ENSMUSG00000040459|ENSMUSG00000021282|ENSMUSG00000045095|ENSMUSG00000025153|…	http://amigo.geneontology.org/cgi-bin/amigo/term_details?term=GO:0005912
intracellular organelle part	GO:0044446	122	5364	6.67e-10	3.95e-08	ENSMUSG00000040249|ENSMUSG00000024073|ENSMUSG00000030357|ENSMUSG00000023805|ENSMUSG00000031770|ENSMUSG00000059248|ENSMUSG00000047215|ENSMUSG00000021794|ENSMUSG00000034892|ENSMUSG00000040761|ENSMUSG00000034891|ENSMUSG00000037152|ENSMUSG00000025261|ENSMUSG00000075706|ENSMUSG00000045038|ENSMUSG00000036427|ENSMUSG00000038690|ENSMUSG00000062591|ENSMUSG00000033419|ENSMUSG00000000560|ENSMUSG00000027651|…	http://amigo.geneontology.org/cgi-bin/amigo/term_details?term=GO:0044446
single-organism localization	GO:1902578	68	2281	7.42e-10	4.34e-08	ENSMUSG00000040249|ENSMUSG00000052727|ENSMUSG00000022892|ENSMUSG00000004961|ENSMUSG00000020716|ENSMUSG00000063077|ENSMUSG00000035885|ENSMUSG00000020571|ENSMUSG00000078816|ENSMUSG00000051586|ENSMUSG00000026864|ENSMUSG00000054423|ENSMUSG00000038894|ENSMUSG00000026193|ENSMUSG00000035864|ENSMUSG00000056258|ENSMUSG00000013089|ENSMUSG00000031778|ENSMUSG00000022443|ENSMUSG00000096054|ENSMUSG00000018411|…	http://amigo.geneontology.org/cgi-bin/amigo/term_details?term=GO:1902578
cell projection part	GO:0044463	37	841	7.87e-10	4.56e-08	ENSMUSG00000030357|ENSMUSG00000032589|ENSMUSG00000023805|ENSMUSG00000056258|ENSMUSG00000022892|ENSMUSG00000035864|ENSMUSG00000015837|ENSMUSG00000059003|ENSMUSG00000023944|ENSMUSG00000096054|ENSMUSG00000018411|ENSMUSG00000034187|ENSMUSG00000034593|ENSMUSG00000026959|ENSMUSG00000023033|ENSMUSG00000049044|ENSMUSG00000034891|ENSMUSG00000061601|ENSMUSG00000004032|ENSMUSG00000017740|ENSMUSG00000030209|…	http://amigo.geneontology.org/cgi-bin/amigo/term_details?term=GO:0044463
neuron differentiation	GO:0030182	44	1145	1.02e-09	5.85e-08	ENSMUSG00000042834|ENSMUSG00000026131|ENSMUSG00000033585|ENSMUSG00000020716|ENSMUSG00000040249|ENSMUSG00000021451|ENSMUSG00000055407|ENSMUSG00000056602|ENSMUSG00000028341|ENSMUSG00000026193|ENSMUSG00000035864|ENSMUSG00000017485|ENSMUSG00000005533|ENSMUSG00000006711|ENSMUSG00000018411|ENSMUSG00000030020|ENSMUSG00000026959|ENSMUSG00000051391|ENSMUSG00000050071|ENSMUSG00000096054|ENSMUSG00000042453|…	http://amigo.geneontology.org/cgi-bin/amigo/term_details?term=GO:0030182
macromolecular complex	GO:0032991	100	4083	1.21e-09	6.86e-08	ENSMUSG00000040249|ENSMUSG00000030357|ENSMUSG00000025855|ENSMUSG00000031770|ENSMUSG00000002957|ENSMUSG00000038894|ENSMUSG00000059003|ENSMUSG00000059248|ENSMUSG00000034088|ENSMUSG00000047215|ENSMUSG00000034892|ENSMUSG00000004951|ENSMUSG00000040761|ENSMUSG00000037152|ENSMUSG00000030209|ENSMUSG00000038690|ENSMUSG00000026959|ENSMUSG00000024966|ENSMUSG00000033419|ENSMUSG00000000560|ENSMUSG00000027651|…	http://amigo.geneontology.org/cgi-bin/amigo/term_details?term=GO:0032991
negative regulation of biological process	GO:0048519	96	3860	1.39e-09	7.79e-08	ENSMUSG00000040249|ENSMUSG00000024073|ENSMUSG00000030357|ENSMUSG00000025855|ENSMUSG00000031770|ENSMUSG00000038894|ENSMUSG00000059003|ENSMUSG00000031778|ENSMUSG00000049313|ENSMUSG00000056602|ENSMUSG00000004951|ENSMUSG00000040761|ENSMUSG00000034891|ENSMUSG00000020893|ENSMUSG00000032826|ENSMUSG00000024042|ENSMUSG00000042182|ENSMUSG00000045038|ENSMUSG00000036427|ENSMUSG00000026959|ENSMUSG00000031765|…	http://amigo.geneontology.org/cgi-bin/amigo/term_details?term=GO:0048519
plasma membrane	GO:0005886	94	3747	1.44e-09	7.99e-08	ENSMUSG00000040249|ENSMUSG00000006575|ENSMUSG00000025855|ENSMUSG00000023805|ENSMUSG00000002957|ENSMUSG00000038894|ENSMUSG00000022565|ENSMUSG00000059003|ENSMUSG00000031778|ENSMUSG00000039953|ENSMUSG00000004951|ENSMUSG00000030209|ENSMUSG00000032826|ENSMUSG00000048078|ENSMUSG00000030683|ENSMUSG00000036427|ENSMUSG00000026959|ENSMUSG00000052698|ENSMUSG00000033419|ENSMUSG00000000560|ENSMUSG00000022311|…	http://amigo.geneontology.org/cgi-bin/amigo/term_details?term=GO:0005886
negative regulation of cellular process	GO:0048523	91	3591	1.8e-09	9.89e-08	ENSMUSG00000040249|ENSMUSG00000024073|ENSMUSG00000030357|ENSMUSG00000025855|ENSMUSG00000031770|ENSMUSG00000038894|ENSMUSG00000031778|ENSMUSG00000049313|ENSMUSG00000056602|ENSMUSG00000004951|ENSMUSG00000040761|ENSMUSG00000034891|ENSMUSG00000020893|ENSMUSG00000032826|ENSMUSG00000024042|ENSMUSG00000042182|ENSMUSG00000045038|ENSMUSG00000036427|ENSMUSG00000026959|ENSMUSG00000031765|ENSMUSG00000027499|…	http://amigo.geneontology.org/cgi-bin/amigo/term_details?term=GO:0048523
organic substance metabolic process	GO:0071704	163	8162	2.32e-09	1.26e-07	ENSMUSG00000040249|ENSMUSG00000024073|ENSMUSG00000006575|ENSMUSG00000030357|ENSMUSG00000068739|ENSMUSG00000025855|ENSMUSG00000023805|ENSMUSG00000031770|ENSMUSG00000038894|ENSMUSG00000059003|ENSMUSG00000031778|ENSMUSG00000042453|ENSMUSG00000034088|ENSMUSG00000047215|ENSMUSG00000056602|ENSMUSG00000021794|ENSMUSG00000034892|ENSMUSG00000004951|ENSMUSG00000040761|ENSMUSG00000034891|ENSMUSG00000025264|…	http://amigo.geneontology.org/cgi-bin/amigo/term_details?term=GO:0071704
cell death	GO:0008219	55	1692	2.41e-09	1.3e-07	ENSMUSG00000059003|ENSMUSG00000040249|ENSMUSG00000049313|ENSMUSG00000023915|ENSMUSG00000024073|ENSMUSG00000053192|ENSMUSG00000022892|ENSMUSG00000031770|ENSMUSG00000038894|ENSMUSG00000026193|ENSMUSG00000015837|ENSMUSG00000028410|ENSMUSG00000031778|ENSMUSG00000005533|ENSMUSG00000018411|ENSMUSG00000004207|ENSMUSG00000020716|ENSMUSG00000025151|ENSMUSG00000020048|ENSMUSG00000032826|ENSMUSG00000032115|…	http://amigo.geneontology.org/cgi-bin/amigo/term_details?term=GO:0008219
extracellular region	GO:0005576	91	3651	4.08e-09	2.17e-07	ENSMUSG00000030357|ENSMUSG00000068739|ENSMUSG00000026959|ENSMUSG00000022565|ENSMUSG00000031778|ENSMUSG00000039953|ENSMUSG00000034088|ENSMUSG00000047215|ENSMUSG00000051391|ENSMUSG00000042453|ENSMUSG00000004951|ENSMUSG00000040761|ENSMUSG00000025261|ENSMUSG00000030209|ENSMUSG00000075706|ENSMUSG00000036427|ENSMUSG00000038690|ENSMUSG00000062591|ENSMUSG00000025190|ENSMUSG00000034336|ENSMUSG00000026426|…	http://amigo.geneontology.org/cgi-bin/amigo/term_details?term=GO:0005576
cytosol	GO:0005829	46	1300	4.99e-09	2.64e-07	ENSMUSG00000033585|ENSMUSG00000059970|ENSMUSG00000006575|ENSMUSG00000030357|ENSMUSG00000078816|ENSMUSG00000038894|ENSMUSG00000028410|ENSMUSG00000023944|ENSMUSG00000022443|ENSMUSG00000030224|ENSMUSG00000025487|ENSMUSG00000034593|ENSMUSG00000029020|ENSMUSG00000047215|ENSMUSG00000051359|ENSMUSG00000017485|ENSMUSG00000034892|ENSMUSG00000049044|ENSMUSG00000034994|ENSMUSG00000003814|ENSMUSG00000020048|…	http://amigo.geneontology.org/cgi-bin/amigo/term_details?term=GO:0005829
cell differentiation	GO:0030154	84	3277	5.78e-09	3.01e-07	ENSMUSG00000059003|ENSMUSG00000040249|ENSMUSG00000047976|ENSMUSG00000052727|ENSMUSG00000033585|ENSMUSG00000023915|ENSMUSG00000020716|ENSMUSG00000042834|ENSMUSG00000059970|ENSMUSG00000021451|ENSMUSG00000027951|ENSMUSG00000055407|ENSMUSG00000002052|ENSMUSG00000022892|ENSMUSG00000056602|ENSMUSG00000042182|ENSMUSG00000029765|ENSMUSG00000028341|ENSMUSG00000026193|ENSMUSG00000035864|ENSMUSG00000015837|…	http://amigo.geneontology.org/cgi-bin/amigo/term_details?term=GO:0030154
regulation of cell death	GO:0010941	47	1353	5.82e-09	3.01e-07	ENSMUSG00000059003|ENSMUSG00000040249|ENSMUSG00000023915|ENSMUSG00000024073|ENSMUSG00000053192|ENSMUSG00000031770|ENSMUSG00000038894|ENSMUSG00000026193|ENSMUSG00000028341|ENSMUSG00000028410|ENSMUSG00000031778|ENSMUSG00000005533|ENSMUSG00000004207|ENSMUSG00000020716|ENSMUSG00000025151|ENSMUSG00000020048|ENSMUSG00000032115|ENSMUSG00000034892|ENSMUSG00000004951|ENSMUSG00000034891|ENSMUSG00000023034|…	http://amigo.geneontology.org/cgi-bin/amigo/term_details?term=GO:0010941
metabolic process	GO:0008152	167	8538	6.03e-09	3.05e-07	ENSMUSG00000040249|ENSMUSG00000024073|ENSMUSG00000006575|ENSMUSG00000030357|ENSMUSG00000068739|ENSMUSG00000025855|ENSMUSG00000023805|ENSMUSG00000031770|ENSMUSG00000038894|ENSMUSG00000059003|ENSMUSG00000031778|ENSMUSG00000042453|ENSMUSG00000034088|ENSMUSG00000047215|ENSMUSG00000056602|ENSMUSG00000021794|ENSMUSG00000034892|ENSMUSG00000004951|ENSMUSG00000040761|ENSMUSG00000034891|ENSMUSG00000037152|…	http://amigo.geneontology.org/cgi-bin/amigo/term_details?term=GO:0008152
regulation of neurogenesis	GO:0050767	32	706	6.05e-09	3.05e-07	ENSMUSG00000040249|ENSMUSG00000050071|ENSMUSG00000020716|ENSMUSG00000042834|ENSMUSG00000021451|ENSMUSG00000022892|ENSMUSG00000022054|ENSMUSG00000026193|ENSMUSG00000035864|ENSMUSG00000013089|ENSMUSG00000031778|ENSMUSG00000096054|ENSMUSG00000006711|ENSMUSG00000018411|ENSMUSG00000045983|ENSMUSG00000049313|ENSMUSG00000051391|ENSMUSG00000042453|ENSMUSG00000004951|ENSMUSG00000040761|ENSMUSG00000003814|…	http://amigo.geneontology.org/cgi-bin/amigo/term_details?term=GO:0050767
cellular metabolic process	GO:0044237	155	7716	6.05e-09	3.05e-07	ENSMUSG00000024073|ENSMUSG00000006575|ENSMUSG00000030357|ENSMUSG00000068739|ENSMUSG00000025855|ENSMUSG00000023805|ENSMUSG00000031770|ENSMUSG00000038894|ENSMUSG00000059003|ENSMUSG00000031778|ENSMUSG00000042453|ENSMUSG00000049313|ENSMUSG00000047215|ENSMUSG00000056602|ENSMUSG00000021794|ENSMUSG00000034892|ENSMUSG00000004951|ENSMUSG00000040761|ENSMUSG00000034891|ENSMUSG00000025264|ENSMUSG00000020893|…	http://amigo.geneontology.org/cgi-bin/amigo/term_details?term=GO:0044237
response to organic substance	GO:0010033	60	1994	6.67e-09	3.33e-07	ENSMUSG00000059003|ENSMUSG00000042834|ENSMUSG00000033585|ENSMUSG00000039804|ENSMUSG00000030357|ENSMUSG00000022892|ENSMUSG00000024042|ENSMUSG00000031770|ENSMUSG00000038894|ENSMUSG00000026193|ENSMUSG00000028341|ENSMUSG00000028410|ENSMUSG00000031778|ENSMUSG00000005533|ENSMUSG00000018411|ENSMUSG00000004207|ENSMUSG00000034593|ENSMUSG00000029020|ENSMUSG00000046785|ENSMUSG00000023944|ENSMUSG00000020048|…	http://amigo.geneontology.org/cgi-bin/amigo/term_details?term=GO:0010033
modulation of synaptic transmission	GO:0050804	20	289	7.9e-09	3.91e-07	ENSMUSG00000030302|ENSMUSG00000018411|ENSMUSG00000030209|ENSMUSG00000039953|ENSMUSG00000020716|ENSMUSG00000034275|ENSMUSG00000029467|ENSMUSG00000051391|ENSMUSG00000035383|ENSMUSG00000002028|ENSMUSG00000027296|ENSMUSG00000045038|ENSMUSG00000049044|ENSMUSG00000028833|ENSMUSG00000026959|ENSMUSG00000035864|ENSMUSG00000039542|ENSMUSG00000059003|ENSMUSG00000038418|ENSMUSG00000042453	http://amigo.geneontology.org/cgi-bin/amigo/term_details?term=GO:0050804
regulation of nervous system development	GO:0051960	34	797	8.41e-09	4.12e-07	ENSMUSG00000040249|ENSMUSG00000050071|ENSMUSG00000020716|ENSMUSG00000042834|ENSMUSG00000021451|ENSMUSG00000022892|ENSMUSG00000022054|ENSMUSG00000026193|ENSMUSG00000035864|ENSMUSG00000013089|ENSMUSG00000031778|ENSMUSG00000096054|ENSMUSG00000006711|ENSMUSG00000018411|ENSMUSG00000039953|ENSMUSG00000049313|ENSMUSG00000051391|ENSMUSG00000042453|ENSMUSG00000004951|ENSMUSG00000040761|ENSMUSG00000003814|…	http://amigo.geneontology.org/cgi-bin/amigo/term_details?term=GO:0051960
primary metabolic process	GO:0044238	155	7757	8.96e-09	4.35e-07	ENSMUSG00000040249|ENSMUSG00000024073|ENSMUSG00000006575|ENSMUSG00000030357|ENSMUSG00000068739|ENSMUSG00000025855|ENSMUSG00000023805|ENSMUSG00000031770|ENSMUSG00000038894|ENSMUSG00000059003|ENSMUSG00000031778|ENSMUSG00000042453|ENSMUSG00000034088|ENSMUSG00000047215|ENSMUSG00000056602|ENSMUSG00000021794|ENSMUSG00000034892|ENSMUSG00000004951|ENSMUSG00000040761|ENSMUSG00000025264|ENSMUSG00000020893|…	http://amigo.geneontology.org/cgi-bin/amigo/term_details?term=GO:0044238
negative regulation of cell death	GO:0060548	35	844	9.94e-09	4.78e-07	ENSMUSG00000040249|ENSMUSG00000028341|ENSMUSG00000024073|ENSMUSG00000027951|ENSMUSG00000031770|ENSMUSG00000038894|ENSMUSG00000026193|ENSMUSG00000028410|ENSMUSG00000031778|ENSMUSG00000005533|ENSMUSG00000004207|ENSMUSG00000049313|ENSMUSG00000023944|ENSMUSG00000032115|ENSMUSG00000020048|ENSMUSG00000004951|ENSMUSG00000034891|ENSMUSG00000023034|ENSMUSG00000039474|ENSMUSG00000045038|ENSMUSG00000036427|…	http://amigo.geneontology.org/cgi-bin/amigo/term_details?term=GO:0060548
cellular developmental process	GO:0048869	88	3553	1.1e-08	5.27e-07	ENSMUSG00000040249|ENSMUSG00000002957|ENSMUSG00000028341|ENSMUSG00000059003|ENSMUSG00000031778|ENSMUSG00000059248|ENSMUSG00000030020|ENSMUSG00000049313|ENSMUSG00000056602|ENSMUSG00000042453|ENSMUSG00000004951|ENSMUSG00000040761|ENSMUSG00000025261|ENSMUSG00000032826|ENSMUSG00000024042|ENSMUSG00000048078|ENSMUSG00000042182|ENSMUSG00000026959|ENSMUSG00000033419|ENSMUSG00000034336|ENSMUSG00000028833|…	http://amigo.geneontology.org/cgi-bin/amigo/term_details?term=GO:0048869
cell-cell junction	GO:0005911	28	573	1.24e-08	5.86e-07	ENSMUSG00000026864|ENSMUSG00000022892|ENSMUSG00000022565|ENSMUSG00000023944|ENSMUSG00000022443|ENSMUSG00000059248|ENSMUSG00000045983|ENSMUSG00000034088|ENSMUSG00000032826|ENSMUSG00000025153|ENSMUSG00000034994|ENSMUSG00000022285|ENSMUSG00000040459|ENSMUSG00000021282|ENSMUSG00000069601|ENSMUSG00000045095|ENSMUSG00000001924|ENSMUSG00000005483|ENSMUSG00000078816|ENSMUSG00000052698|ENSMUSG00000074923|…	http://amigo.geneontology.org/cgi-bin/amigo/term_details?term=GO:0005911
locomotory behavior	GO:0007626	17	213	1.53e-08	7.18e-07	ENSMUSG00000030302|ENSMUSG00000018411|ENSMUSG00000058153|ENSMUSG00000046876|ENSMUSG00000034593|ENSMUSG00000026959|ENSMUSG00000038248|ENSMUSG00000013089|ENSMUSG00000031996|ENSMUSG00000023033|ENSMUSG00000030683|ENSMUSG00000022892|ENSMUSG00000045038|ENSMUSG00000059003|ENSMUSG00000024413|ENSMUSG00000074923|ENSMUSG00000042453	http://amigo.geneontology.org/cgi-bin/amigo/term_details?term=GO:0007626
behavior	GO:0007610	28	580	1.59e-08	7.38e-07	ENSMUSG00000020716|ENSMUSG00000030209|ENSMUSG00000031996|ENSMUSG00000028341|ENSMUSG00000022892|ENSMUSG00000059003|ENSMUSG00000018411|ENSMUSG00000045983|ENSMUSG00000034593|ENSMUSG00000023033|ENSMUSG00000042453|ENSMUSG00000017740|ENSMUSG00000030302|ENSMUSG00000058153|ENSMUSG00000046876|ENSMUSG00000038248|ENSMUSG00000025855|ENSMUSG00000030683|ENSMUSG00000078816|ENSMUSG00000026959|ENSMUSG00000074923|…	http://amigo.geneontology.org/cgi-bin/amigo/term_details?term=GO:0007610
cytoskeletal protein binding	GO:0008092	32	740	1.75e-08	8.05e-07	ENSMUSG00000026131|ENSMUSG00000033585|ENSMUSG00000020716|ENSMUSG00000063077|ENSMUSG00000034891|ENSMUSG00000030357|ENSMUSG00000051586|ENSMUSG00000055407|ENSMUSG00000022565|ENSMUSG00000022443|ENSMUSG00000096054|ENSMUSG00000018411|ENSMUSG00000039953|ENSMUSG00000034593|ENSMUSG00000051359|ENSMUSG00000032826|ENSMUSG00000034994|ENSMUSG00000027254|ENSMUSG00000026933|ENSMUSG00000069601|ENSMUSG00000045095|…	http://amigo.geneontology.org/cgi-bin/amigo/term_details?term=GO:0008092
single-organism transport	GO:0044765	61	2101	1.76e-08	8.05e-07	ENSMUSG00000040249|ENSMUSG00000052727|ENSMUSG00000022892|ENSMUSG00000004961|ENSMUSG00000020716|ENSMUSG00000063077|ENSMUSG00000035885|ENSMUSG00000020571|ENSMUSG00000078816|ENSMUSG00000051586|ENSMUSG00000054423|ENSMUSG00000038894|ENSMUSG00000026193|ENSMUSG00000035864|ENSMUSG00000056258|ENSMUSG00000031778|ENSMUSG00000022443|ENSMUSG00000018411|ENSMUSG00000034187|ENSMUSG00000034593|ENSMUSG00000027894|…	http://amigo.geneontology.org/cgi-bin/amigo/term_details?term=GO:0044765
neuron projection development	GO:0031175	33	783	1.87e-08	8.46e-07	ENSMUSG00000040249|ENSMUSG00000026131|ENSMUSG00000033585|ENSMUSG00000006711|ENSMUSG00000021451|ENSMUSG00000055407|ENSMUSG00000022054|ENSMUSG00000028341|ENSMUSG00000026193|ENSMUSG00000035864|ENSMUSG00000096054|ENSMUSG00000018411|ENSMUSG00000030020|ENSMUSG00000056602|ENSMUSG00000017485|ENSMUSG00000042453|ENSMUSG00000004951|ENSMUSG00000005533|ENSMUSG00000049044|ENSMUSG00000026933|ENSMUSG00000069601|…	http://amigo.geneontology.org/cgi-bin/amigo/term_details?term=GO:0031175
carbohydrate derivative binding	GO:0097367	57	1903	2.01e-08	9.01e-07	ENSMUSG00000051853|ENSMUSG00000022892|ENSMUSG00000029777|ENSMUSG00000063077|ENSMUSG00000059970|ENSMUSG00000030357|ENSMUSG00000068739|ENSMUSG00000001930|ENSMUSG00000031996|ENSMUSG00000026864|ENSMUSG00000022454|ENSMUSG00000030655|ENSMUSG00000028410|ENSMUSG00000023944|ENSMUSG00000022443|ENSMUSG00000005533|ENSMUSG00000034187|ENSMUSG00000034593|ENSMUSG00000007594|ENSMUSG00000026356|ENSMUSG00000032115|…	http://amigo.geneontology.org/cgi-bin/amigo/term_details?term=GO:0097367
neuron development	GO:0048666	36	913	2.08e-08	9.28e-07	ENSMUSG00000040249|ENSMUSG00000026131|ENSMUSG00000033585|ENSMUSG00000006711|ENSMUSG00000021451|ENSMUSG00000055407|ENSMUSG00000022054|ENSMUSG00000028341|ENSMUSG00000026193|ENSMUSG00000035864|ENSMUSG00000005533|ENSMUSG00000018411|ENSMUSG00000030020|ENSMUSG00000056602|ENSMUSG00000017485|ENSMUSG00000096054|ENSMUSG00000042453|ENSMUSG00000004951|ENSMUSG00000049044|ENSMUSG00000030302|ENSMUSG00000026933|…	http://amigo.geneontology.org/cgi-bin/amigo/term_details?term=GO:0048666
intracellular non-membrane-bounded organelle	GO:0043232	82	3266	2.35e-08	1.03e-06	ENSMUSG00000032589|ENSMUSG00000040249|ENSMUSG00000026131|ENSMUSG00000033585|ENSMUSG00000034187|ENSMUSG00000020716|ENSMUSG00000063077|ENSMUSG00000059970|ENSMUSG00000030357|ENSMUSG00000055407|ENSMUSG00000019726|ENSMUSG00000030209|ENSMUSG00000022054|ENSMUSG00000023805|ENSMUSG00000051586|ENSMUSG00000039804|ENSMUSG00000034593|ENSMUSG00000022565|ENSMUSG00000015837|ENSMUSG00000059003|ENSMUSG00000025151|…	http://amigo.geneontology.org/cgi-bin/amigo/term_details?term=GO:0043232
non-membrane-bounded organelle	GO:0043228	82	3266	2.35e-08	1.03e-06	ENSMUSG00000032589|ENSMUSG00000040249|ENSMUSG00000026131|ENSMUSG00000033585|ENSMUSG00000034187|ENSMUSG00000020716|ENSMUSG00000063077|ENSMUSG00000059970|ENSMUSG00000030357|ENSMUSG00000055407|ENSMUSG00000019726|ENSMUSG00000030209|ENSMUSG00000022054|ENSMUSG00000023805|ENSMUSG00000051586|ENSMUSG00000039804|ENSMUSG00000034593|ENSMUSG00000022565|ENSMUSG00000015837|ENSMUSG00000059003|ENSMUSG00000025151|…	http://amigo.geneontology.org/cgi-bin/amigo/term_details?term=GO:0043228
cytoskeleton	GO:0005856	53	1711	2.37e-08	1.03e-06	ENSMUSG00000032589|ENSMUSG00000052727|ENSMUSG00000033585|ENSMUSG00000024073|ENSMUSG00000063077|ENSMUSG00000059970|ENSMUSG00000030357|ENSMUSG00000022892|ENSMUSG00000022054|ENSMUSG00000023805|ENSMUSG00000051586|ENSMUSG00000039804|ENSMUSG00000055407|ENSMUSG00000022565|ENSMUSG00000019726|ENSMUSG00000022443|ENSMUSG00000059248|ENSMUSG00000018411|ENSMUSG00000034593|ENSMUSG00000029020|ENSMUSG00000027763|…	http://amigo.geneontology.org/cgi-bin/amigo/term_details?term=GO:0005856
synaptic membrane	GO:0097060	18	251	2.69e-08	1.16e-06	ENSMUSG00000000560|ENSMUSG00000022602|ENSMUSG00000039953|ENSMUSG00000069601|ENSMUSG00000032826|ENSMUSG00000041444|ENSMUSG00000034275|ENSMUSG00000033419|ENSMUSG00000030209|ENSMUSG00000020428|ENSMUSG00000035864|ENSMUSG00000047976|ENSMUSG00000032060|ENSMUSG00000078816|ENSMUSG00000026959|ENSMUSG00000059003|ENSMUSG00000096054|ENSMUSG00000004951	http://amigo.geneontology.org/cgi-bin/amigo/term_details?term=GO:0097060
single-organism behavior	GO:0044708	23	417	3.29e-08	1.41e-06	ENSMUSG00000020716|ENSMUSG00000030209|ENSMUSG00000028341|ENSMUSG00000022892|ENSMUSG00000059003|ENSMUSG00000018411|ENSMUSG00000045983|ENSMUSG00000023033|ENSMUSG00000042453|ENSMUSG00000017740|ENSMUSG00000058153|ENSMUSG00000046876|ENSMUSG00000025855|ENSMUSG00000030683|ENSMUSG00000078816|ENSMUSG00000026959|ENSMUSG00000074923|ENSMUSG00000038418|ENSMUSG00000035383|ENSMUSG00000045038|ENSMUSG00000002028|…	http://amigo.geneontology.org/cgi-bin/amigo/term_details?term=GO:0044708
regulation of synaptic plasticity	GO:0048167	14	146	3.53e-08	1.49e-06	ENSMUSG00000030302|ENSMUSG00000018411|ENSMUSG00000030209|ENSMUSG00000020716|ENSMUSG00000051391|ENSMUSG00000035383|ENSMUSG00000002028|ENSMUSG00000027296|ENSMUSG00000042453|ENSMUSG00000028833|ENSMUSG00000026959|ENSMUSG00000039542|ENSMUSG00000059003|ENSMUSG00000038418	http://amigo.geneontology.org/cgi-bin/amigo/term_details?term=GO:0048167
protein folding	GO:0006457	14	146	3.53e-08	1.49e-06	ENSMUSG00000029657|ENSMUSG00000031197|ENSMUSG00000059970|ENSMUSG00000030357|ENSMUSG00000020571|ENSMUSG00000001774|ENSMUSG00000005483|ENSMUSG00000020048|ENSMUSG00000032060|ENSMUSG00000015656|ENSMUSG00000003814|ENSMUSG00000025823|ENSMUSG00000028410|ENSMUSG00000023944	http://amigo.geneontology.org/cgi-bin/amigo/term_details?term=GO:0006457
protein complex	GO:0043234	85	3477	3.91e-08	1.63e-06	ENSMUSG00000059003|ENSMUSG00000040249|ENSMUSG00000018707|ENSMUSG00000022892|ENSMUSG00000028341|ENSMUSG00000020716|ENSMUSG00000063077|ENSMUSG00000059970|ENSMUSG00000053536|ENSMUSG00000030357|ENSMUSG00000035885|ENSMUSG00000030209|ENSMUSG00000056258|ENSMUSG00000041697|ENSMUSG00000031770|ENSMUSG00000002957|ENSMUSG00000038894|ENSMUSG00000026193|ENSMUSG00000035864|ENSMUSG00000028410|ENSMUSG00000025151|…	http://amigo.geneontology.org/cgi-bin/amigo/term_details?term=GO:0043234
plasma membrane part	GO:0044459	57	1946	4.25e-08	1.76e-06	ENSMUSG00000040249|ENSMUSG00000023915|ENSMUSG00000027894|ENSMUSG00000059970|ENSMUSG00000021451|ENSMUSG00000020577|ENSMUSG00000001930|ENSMUSG00000023805|ENSMUSG00000035864|ENSMUSG00000026193|ENSMUSG00000022565|ENSMUSG00000056258|ENSMUSG00000059003|ENSMUSG00000023944|ENSMUSG00000022443|ENSMUSG00000005533|ENSMUSG00000039953|ENSMUSG00000020716|ENSMUSG00000029765|ENSMUSG00000041313|ENSMUSG00000096054|…	http://amigo.geneontology.org/cgi-bin/amigo/term_details?term=GO:0044459
protein metabolic process	GO:0019538	96	4134	4.37e-08	1.8e-06	ENSMUSG00000024073|ENSMUSG00000030357|ENSMUSG00000068739|ENSMUSG00000025855|ENSMUSG00000031770|ENSMUSG00000059003|ENSMUSG00000031778|ENSMUSG00000042453|ENSMUSG00000049313|ENSMUSG00000047215|ENSMUSG00000056602|ENSMUSG00000034892|ENSMUSG00000004951|ENSMUSG00000020893|ENSMUSG00000025261|ENSMUSG00000030209|ENSMUSG00000024042|ENSMUSG00000048078|ENSMUSG00000045038|ENSMUSG00000036427|ENSMUSG00000027651|…	http://amigo.geneontology.org/cgi-bin/amigo/term_details?term=GO:0019538
perinuclear region of cytoplasm	GO:0048471	25	498	4.71e-08	1.92e-06	ENSMUSG00000040249|ENSMUSG00000049313|ENSMUSG00000030357|ENSMUSG00000022892|ENSMUSG00000023805|ENSMUSG00000055407|ENSMUSG00000022565|ENSMUSG00000031778|ENSMUSG00000096054|ENSMUSG00000020048|ENSMUSG00000059248|ENSMUSG00000003814|ENSMUSG00000022285|ENSMUSG00000061601|ENSMUSG00000032826|ENSMUSG00000029467|ENSMUSG00000045038|ENSMUSG00000047187|ENSMUSG00000078816|ENSMUSG00000052727|ENSMUSG00000004961|…	http://amigo.geneontology.org/cgi-bin/amigo/term_details?term=GO:0048471
endoplasmic reticulum	GO:0005783	45	1358	4.9e-08	1.99e-06	ENSMUSG00000059003|ENSMUSG00000049313|ENSMUSG00000030357|ENSMUSG00000001930|ENSMUSG00000031770|ENSMUSG00000022892|ENSMUSG00000015837|ENSMUSG00000028410|ENSMUSG00000019916|ENSMUSG00000039953|ENSMUSG00000034593|ENSMUSG00000046785|ENSMUSG00000032115|ENSMUSG00000029467|ENSMUSG00000020048|ENSMUSG00000003814|ENSMUSG00000001924|ENSMUSG00000039474|ENSMUSG00000030302|ENSMUSG00000027963|ENSMUSG00000058153|…	http://amigo.geneontology.org/cgi-bin/amigo/term_details?term=GO:0005783
protein localization	GO:0008104	59	2063	5.32e-08	2.13e-06	ENSMUSG00000059003|ENSMUSG00000040249|ENSMUSG00000020716|ENSMUSG00000030357|ENSMUSG00000010376|ENSMUSG00000032589|ENSMUSG00000031770|ENSMUSG00000002957|ENSMUSG00000038894|ENSMUSG00000026193|ENSMUSG00000028410|ENSMUSG00000031778|ENSMUSG00000022443|ENSMUSG00000096054|ENSMUSG00000042453|ENSMUSG00000034187|ENSMUSG00000033004|ENSMUSG00000029020|ENSMUSG00000023944|ENSMUSG00000025777|ENSMUSG00000032826|…	http://amigo.geneontology.org/cgi-bin/amigo/term_details?term=GO:0008104
nucleic acid binding	GO:0003676	75	2936	5.74e-08	2.28e-06	ENSMUSG00000040249|ENSMUSG00000018707|ENSMUSG00000033585|ENSMUSG00000046658|ENSMUSG00000027951|ENSMUSG00000030357|ENSMUSG00000002052|ENSMUSG00000023805|ENSMUSG00000001383|ENSMUSG00000031996|ENSMUSG00000019947|ENSMUSG00000039804|ENSMUSG00000022892|ENSMUSG00000022565|ENSMUSG00000030655|ENSMUSG00000028341|ENSMUSG00000017485|ENSMUSG00000023944|ENSMUSG00000008348|ENSMUSG00000025153|ENSMUSG00000070436|…	http://amigo.geneontology.org/cgi-bin/amigo/term_details?term=GO:0003676
unfolded protein binding	GO:0051082	10	65	6.13e-08	2.42e-06	ENSMUSG00000059970|ENSMUSG00000005483|ENSMUSG00000020048|ENSMUSG00000032060|ENSMUSG00000015656|ENSMUSG00000003814|ENSMUSG00000026864|ENSMUSG00000070436|ENSMUSG00000028410|ENSMUSG00000023944	http://amigo.geneontology.org/cgi-bin/amigo/term_details?term=GO:0051082
regulation of synapse structure or activity	GO:0050803	17	239	7.36e-08	2.89e-06	ENSMUSG00000030302|ENSMUSG00000018411|ENSMUSG00000030209|ENSMUSG00000039953|ENSMUSG00000020716|ENSMUSG00000013089|ENSMUSG00000051391|ENSMUSG00000035383|ENSMUSG00000002028|ENSMUSG00000027296|ENSMUSG00000042453|ENSMUSG00000028833|ENSMUSG00000022892|ENSMUSG00000039542|ENSMUSG00000059003|ENSMUSG00000026959|ENSMUSG00000038418	http://amigo.geneontology.org/cgi-bin/amigo/term_details?term=GO:0050803
macromolecular complex binding	GO:0044877	42	1236	7.44e-08	2.9e-06	ENSMUSG00000040249|ENSMUSG00000039804|ENSMUSG00000049313|ENSMUSG00000001930|ENSMUSG00000026864|ENSMUSG00000002957|ENSMUSG00000038894|ENSMUSG00000026193|ENSMUSG00000059003|ENSMUSG00000031778|ENSMUSG00000022443|ENSMUSG00000096054|ENSMUSG00000018411|ENSMUSG00000034187|ENSMUSG00000023944|ENSMUSG00000024335|ENSMUSG00000017485|ENSMUSG00000005533|ENSMUSG00000034994|ENSMUSG00000003814|ENSMUSG00000022285|…	http://amigo.geneontology.org/cgi-bin/amigo/term_details?term=GO:0044877
intracellular transport	GO:0046907	39	1103	8.48e-08	3.28e-06	ENSMUSG00000052727|ENSMUSG00000020716|ENSMUSG00000063077|ENSMUSG00000002052|ENSMUSG00000022054|ENSMUSG00000031770|ENSMUSG00000002957|ENSMUSG00000028341|ENSMUSG00000022892|ENSMUSG00000023944|ENSMUSG00000018411|ENSMUSG00000034187|ENSMUSG00000034593|ENSMUSG00000029020|ENSMUSG00000025777|ENSMUSG00000032115|ENSMUSG00000051391|ENSMUSG00000020048|ENSMUSG00000003814|ENSMUSG00000024030|ENSMUSG00000025261|…	http://amigo.geneontology.org/cgi-bin/amigo/term_details?term=GO:0046907
endoplasmic reticulum chaperone complex	GO:0034663	6	12	8.86e-08	3.4e-06	ENSMUSG00000032115|ENSMUSG00000020571|ENSMUSG00000020048|ENSMUSG00000022769|ENSMUSG00000026864|ENSMUSG00000025823	http://amigo.geneontology.org/cgi-bin/amigo/term_details?term=GO:0034663
positive regulation of biological process	GO:0048518	100	4443	9.39e-08	3.58e-06	ENSMUSG00000040249|ENSMUSG00000024073|ENSMUSG00000006575|ENSMUSG00000053192|ENSMUSG00000031770|ENSMUSG00000054423|ENSMUSG00000038894|ENSMUSG00000059003|ENSMUSG00000031778|ENSMUSG00000059248|ENSMUSG00000042453|ENSMUSG00000039953|ENSMUSG00000049313|ENSMUSG00000021794|ENSMUSG00000034892|ENSMUSG00000004951|ENSMUSG00000040761|ENSMUSG00000020893|ENSMUSG00000025261|ENSMUSG00000030209|ENSMUSG00000032826|…	http://amigo.geneontology.org/cgi-bin/amigo/term_details?term=GO:0048518
macromolecular complex subunit organization	GO:0043933	53	1793	1.04e-07	3.94e-06	ENSMUSG00000027254|ENSMUSG00000020716|ENSMUSG00000030357|ENSMUSG00000022892|ENSMUSG00000001930|ENSMUSG00000051586|ENSMUSG00000026193|ENSMUSG00000015837|ENSMUSG00000059003|ENSMUSG00000031778|ENSMUSG00000005533|ENSMUSG00000025487|ENSMUSG00000018411|ENSMUSG00000031197|ENSMUSG00000049313|ENSMUSG00000039485|ENSMUSG00000027763|ENSMUSG00000024335|ENSMUSG00000045193|ENSMUSG00000022054|ENSMUSG00000054423|…	http://amigo.geneontology.org/cgi-bin/amigo/term_details?term=GO:0043933
protein binding involved in cell-cell adhesion	GO:0098632	17	247	1.15e-07	4.32e-06	ENSMUSG00000026442|ENSMUSG00000045983|ENSMUSG00000034088|ENSMUSG00000023944|ENSMUSG00000000787|ENSMUSG00000015656|ENSMUSG00000022443|ENSMUSG00000005483|ENSMUSG00000026864|ENSMUSG00000059248|ENSMUSG00000034994|ENSMUSG00000022565|ENSMUSG00000022285|ENSMUSG00000040459|ENSMUSG00000074923|ENSMUSG00000025153|ENSMUSG00000021282	http://amigo.geneontology.org/cgi-bin/amigo/term_details?term=GO:0098632
protein binding involved in cell adhesion	GO:0098631	17	249	1.28e-07	4.76e-06	ENSMUSG00000026442|ENSMUSG00000045983|ENSMUSG00000034088|ENSMUSG00000023944|ENSMUSG00000000787|ENSMUSG00000015656|ENSMUSG00000022443|ENSMUSG00000005483|ENSMUSG00000026864|ENSMUSG00000059248|ENSMUSG00000034994|ENSMUSG00000022565|ENSMUSG00000022285|ENSMUSG00000040459|ENSMUSG00000074923|ENSMUSG00000025153|ENSMUSG00000021282	http://amigo.geneontology.org/cgi-bin/amigo/term_details?term=GO:0098631
macromolecule metabolic process	GO:0043170	137	6843	1.39e-07	5.11e-06	ENSMUSG00000024073|ENSMUSG00000030357|ENSMUSG00000068739|ENSMUSG00000025855|ENSMUSG00000031770|ENSMUSG00000038894|ENSMUSG00000059003|ENSMUSG00000031778|ENSMUSG00000042453|ENSMUSG00000049313|ENSMUSG00000047215|ENSMUSG00000056602|ENSMUSG00000034892|ENSMUSG00000004951|ENSMUSG00000040761|ENSMUSG00000025264|ENSMUSG00000020893|ENSMUSG00000053192|ENSMUSG00000025261|ENSMUSG00000030209|ENSMUSG00000039501|…	http://amigo.geneontology.org/cgi-bin/amigo/term_details?term=GO:0043170
macromolecule localization	GO:0033036	63	2337	1.39e-07	5.11e-06	ENSMUSG00000059003|ENSMUSG00000040249|ENSMUSG00000047976|ENSMUSG00000049313|ENSMUSG00000020716|ENSMUSG00000030357|ENSMUSG00000010376|ENSMUSG00000002052|ENSMUSG00000032589|ENSMUSG00000031770|ENSMUSG00000002957|ENSMUSG00000038894|ENSMUSG00000026193|ENSMUSG00000028410|ENSMUSG00000031778|ENSMUSG00000022443|ENSMUSG00000096054|ENSMUSG00000042453|ENSMUSG00000034187|ENSMUSG00000033004|ENSMUSG00000034088|…	http://amigo.geneontology.org/cgi-bin/amigo/term_details?term=GO:0033036
neuron projection terminus	GO:0044306	14	166	1.55e-07	5.63e-06	ENSMUSG00000030209|ENSMUSG00000034891|ENSMUSG00000025190|ENSMUSG00000022892|ENSMUSG00000032589|ENSMUSG00000023805|ENSMUSG00000047976|ENSMUSG00000049044|ENSMUSG00000015656|ENSMUSG00000035864|ENSMUSG00000026959|ENSMUSG00000059003|ENSMUSG00000061601|ENSMUSG00000033419	http://amigo.geneontology.org/cgi-bin/amigo/term_details?term=GO:0044306
positive regulation of cellular process	GO:0048522	92	4018	1.82e-07	6.59e-06	ENSMUSG00000024073|ENSMUSG00000006575|ENSMUSG00000053192|ENSMUSG00000031770|ENSMUSG00000028341|ENSMUSG00000059003|ENSMUSG00000031778|ENSMUSG00000059248|ENSMUSG00000039953|ENSMUSG00000049313|ENSMUSG00000021794|ENSMUSG00000042453|ENSMUSG00000004951|ENSMUSG00000040761|ENSMUSG00000020893|ENSMUSG00000025261|ENSMUSG00000030209|ENSMUSG00000032826|ENSMUSG00000048078|ENSMUSG00000042182|ENSMUSG00000045038|…	http://amigo.geneontology.org/cgi-bin/amigo/term_details?term=GO:0048522
regulation of neuron differentiation	GO:0045664	26	576	1.85e-07	6.66e-06	ENSMUSG00000006711|ENSMUSG00000050071|ENSMUSG00000020716|ENSMUSG00000040249|ENSMUSG00000021451|ENSMUSG00000026193|ENSMUSG00000022054|ENSMUSG00000022892|ENSMUSG00000035864|ENSMUSG00000013089|ENSMUSG00000096054|ENSMUSG00000018411|ENSMUSG00000045983|ENSMUSG00000051391|ENSMUSG00000042453|ENSMUSG00000004951|ENSMUSG00000005533|ENSMUSG00000003814|ENSMUSG00000049044|ENSMUSG00000029765|ENSMUSG00000025020|…	http://amigo.geneontology.org/cgi-bin/amigo/term_details?term=GO:0045664
regulation of cell development	GO:0060284	33	868	1.89e-07	6.74e-06	ENSMUSG00000040249|ENSMUSG00000050071|ENSMUSG00000020716|ENSMUSG00000042834|ENSMUSG00000021451|ENSMUSG00000022892|ENSMUSG00000022054|ENSMUSG00000026193|ENSMUSG00000035864|ENSMUSG00000013089|ENSMUSG00000031778|ENSMUSG00000096054|ENSMUSG00000006711|ENSMUSG00000018411|ENSMUSG00000045983|ENSMUSG00000049313|ENSMUSG00000051391|ENSMUSG00000042453|ENSMUSG00000004951|ENSMUSG00000040761|ENSMUSG00000003814|…	http://amigo.geneontology.org/cgi-bin/amigo/term_details?term=GO:0060284
cadherin binding	GO:0045296	17	258	2.06e-07	7.3e-06	ENSMUSG00000045983|ENSMUSG00000069601|ENSMUSG00000034088|ENSMUSG00000023944|ENSMUSG00000000787|ENSMUSG00000015656|ENSMUSG00000022443|ENSMUSG00000005483|ENSMUSG00000026864|ENSMUSG00000059248|ENSMUSG00000034994|ENSMUSG00000022565|ENSMUSG00000022285|ENSMUSG00000040459|ENSMUSG00000074923|ENSMUSG00000025153|ENSMUSG00000021282	http://amigo.geneontology.org/cgi-bin/amigo/term_details?term=GO:0045296
cell morphogenesis involved in neuron differentiation	GO:0048667	23	468	2.36e-07	8.31e-06	ENSMUSG00000052727|ENSMUSG00000033585|ENSMUSG00000021451|ENSMUSG00000026193|ENSMUSG00000028341|ENSMUSG00000055407|ENSMUSG00000096054|ENSMUSG00000018411|ENSMUSG00000022054|ENSMUSG00000017485|ENSMUSG00000042453|ENSMUSG00000005533|ENSMUSG00000030302|ENSMUSG00000069601|ENSMUSG00000029765|ENSMUSG00000033004|ENSMUSG00000025020|ENSMUSG00000027296|ENSMUSG00000026959|ENSMUSG00000033419|ENSMUSG00000026442|…	http://amigo.geneontology.org/cgi-bin/amigo/term_details?term=GO:0048667
presynapse	GO:0098793	16	230	2.37e-07	8.32e-06	ENSMUSG00000000560|ENSMUSG00000030209|ENSMUSG00000034593|ENSMUSG00000027894|ENSMUSG00000034891|ENSMUSG00000022892|ENSMUSG00000020428|ENSMUSG00000032589|ENSMUSG00000004961|ENSMUSG00000047976|ENSMUSG00000015656|ENSMUSG00000035864|ENSMUSG00000026959|ENSMUSG00000059003|ENSMUSG00000061601|ENSMUSG00000033419	http://amigo.geneontology.org/cgi-bin/amigo/term_details?term=GO:0098793
anatomical structure morphogenesis	GO:0009653	62	2323	2.52e-07	8.77e-06	ENSMUSG00000040249|ENSMUSG00000052727|ENSMUSG00000033585|ENSMUSG00000021373|ENSMUSG00000020716|ENSMUSG00000021451|ENSMUSG00000055407|ENSMUSG00000025855|ENSMUSG00000022054|ENSMUSG00000026864|ENSMUSG00000028341|ENSMUSG00000026193|ENSMUSG00000035864|ENSMUSG00000026959|ENSMUSG00000013089|ENSMUSG00000031778|ENSMUSG00000022443|ENSMUSG00000005533|ENSMUSG00000018411|ENSMUSG00000030020|ENSMUSG00000033004|…	http://amigo.geneontology.org/cgi-bin/amigo/term_details?term=GO:0009653
cellular macromolecule metabolic process	GO:0044260	127	6252	2.59e-07	8.95e-06	ENSMUSG00000024073|ENSMUSG00000030357|ENSMUSG00000068739|ENSMUSG00000025855|ENSMUSG00000031770|ENSMUSG00000038894|ENSMUSG00000031778|ENSMUSG00000042453|ENSMUSG00000049313|ENSMUSG00000047215|ENSMUSG00000056602|ENSMUSG00000034892|ENSMUSG00000004951|ENSMUSG00000040761|ENSMUSG00000025264|ENSMUSG00000020893|ENSMUSG00000053192|ENSMUSG00000025261|ENSMUSG00000030209|ENSMUSG00000039501|ENSMUSG00000024042|…	http://amigo.geneontology.org/cgi-bin/amigo/term_details?term=GO:0044260
single-organism cellular localization	GO:1902580	32	839	2.73e-07	9.39e-06	ENSMUSG00000026131|ENSMUSG00000020716|ENSMUSG00000063077|ENSMUSG00000028341|ENSMUSG00000022892|ENSMUSG00000035864|ENSMUSG00000013089|ENSMUSG00000023944|ENSMUSG00000022443|ENSMUSG00000018411|ENSMUSG00000034187|ENSMUSG00000034593|ENSMUSG00000022054|ENSMUSG00000054423|ENSMUSG00000042453|ENSMUSG00000022285|ENSMUSG00000039318|ENSMUSG00000061601|ENSMUSG00000030209|ENSMUSG00000069601|ENSMUSG00000032826|…	http://amigo.geneontology.org/cgi-bin/amigo/term_details?term=GO:1902580
apoptotic process	GO:0006915	47	1546	2.81e-07	9.6e-06	ENSMUSG00000059003|ENSMUSG00000040249|ENSMUSG00000023915|ENSMUSG00000024073|ENSMUSG00000053192|ENSMUSG00000022892|ENSMUSG00000031770|ENSMUSG00000038894|ENSMUSG00000026193|ENSMUSG00000015837|ENSMUSG00000028410|ENSMUSG00000031778|ENSMUSG00000005533|ENSMUSG00000018411|ENSMUSG00000020048|ENSMUSG00000020716|ENSMUSG00000025151|ENSMUSG00000032115|ENSMUSG00000034892|ENSMUSG00000004951|ENSMUSG00000034891|…	http://amigo.geneontology.org/cgi-bin/amigo/term_details?term=GO:0006915
plasma membrane region	GO:0098590	31	798	2.9e-07	9.84e-06	ENSMUSG00000020428|ENSMUSG00000023805|ENSMUSG00000035864|ENSMUSG00000026193|ENSMUSG00000022565|ENSMUSG00000059003|ENSMUSG00000023944|ENSMUSG00000096054|ENSMUSG00000030020|ENSMUSG00000004951|ENSMUSG00000017740|ENSMUSG00000005533|ENSMUSG00000049044|ENSMUSG00000030302|ENSMUSG00000030209|ENSMUSG00000069601|ENSMUSG00000032826|ENSMUSG00000042406|ENSMUSG00000047976|ENSMUSG00000039953|ENSMUSG00000036427|…	http://amigo.geneontology.org/cgi-bin/amigo/term_details?term=GO:0098590
membrane part	GO:0044425	110	5174	2.97e-07	1e-05	ENSMUSG00000040249|ENSMUSG00000030357|ENSMUSG00000023805|ENSMUSG00000031770|ENSMUSG00000002957|ENSMUSG00000022565|ENSMUSG00000059003|ENSMUSG00000031778|ENSMUSG00000039953|ENSMUSG00000049313|ENSMUSG00000004951|ENSMUSG00000037152|ENSMUSG00000030209|ENSMUSG00000032826|ENSMUSG00000048078|ENSMUSG00000030683|ENSMUSG00000036427|ENSMUSG00000038690|ENSMUSG00000026959|ENSMUSG00000033419|ENSMUSG00000000560|…	http://amigo.geneontology.org/cgi-bin/amigo/term_details?term=GO:0044425
cell-substrate junction	GO:0030055	19	332	3.1e-07	1.04e-05	ENSMUSG00000026442|ENSMUSG00000040249|ENSMUSG00000015656|ENSMUSG00000047215|ENSMUSG00000026131|ENSMUSG00000032115|ENSMUSG00000051391|ENSMUSG00000024427|ENSMUSG00000024942|ENSMUSG00000034892|ENSMUSG00000004951|ENSMUSG00000022565|ENSMUSG00000022285|ENSMUSG00000003814|ENSMUSG00000020048|ENSMUSG00000026864|ENSMUSG00000052698|ENSMUSG00000022443|ENSMUSG00000073702	http://amigo.geneontology.org/cgi-bin/amigo/term_details?term=GO:0030055
regulation of cellular protein metabolic process	GO:0032268	54	1911	3.14e-07	1.05e-05	ENSMUSG00000020716|ENSMUSG00000059970|ENSMUSG00000021451|ENSMUSG00000027951|ENSMUSG00000022892|ENSMUSG00000002052|ENSMUSG00000031996|ENSMUSG00000031770|ENSMUSG00000026193|ENSMUSG00000015837|ENSMUSG00000028410|ENSMUSG00000031778|ENSMUSG00000022443|ENSMUSG00000005533|ENSMUSG00000042453|ENSMUSG00000004207|ENSMUSG00000024073|ENSMUSG00000031530|ENSMUSG00000025151|ENSMUSG00000045193|ENSMUSG00000056602|…	http://amigo.geneontology.org/cgi-bin/amigo/term_details?term=GO:0032268
regulation of protein metabolic process	GO:0051246	57	2075	3.44e-07	1.14e-05	ENSMUSG00000059003|ENSMUSG00000020716|ENSMUSG00000059970|ENSMUSG00000021451|ENSMUSG00000027951|ENSMUSG00000022892|ENSMUSG00000002052|ENSMUSG00000031996|ENSMUSG00000031770|ENSMUSG00000026193|ENSMUSG00000015837|ENSMUSG00000028410|ENSMUSG00000031778|ENSMUSG00000022443|ENSMUSG00000005533|ENSMUSG00000042453|ENSMUSG00000004207|ENSMUSG00000024073|ENSMUSG00000031530|ENSMUSG00000025151|ENSMUSG00000028790|…	http://amigo.geneontology.org/cgi-bin/amigo/term_details?term=GO:0051246
movement of cell or subcellular component	GO:0006928	45	1460	3.6e-07	1.18e-05	ENSMUSG00000040249|ENSMUSG00000052727|ENSMUSG00000033585|ENSMUSG00000028341|ENSMUSG00000020716|ENSMUSG00000063077|ENSMUSG00000021451|ENSMUSG00000022892|ENSMUSG00000026864|ENSMUSG00000038894|ENSMUSG00000026193|ENSMUSG00000028410|ENSMUSG00000031778|ENSMUSG00000022443|ENSMUSG00000005533|ENSMUSG00000006711|ENSMUSG00000018411|ENSMUSG00000034593|ENSMUSG00000049313|ENSMUSG00000029765|ENSMUSG00000022054|…	http://amigo.geneontology.org/cgi-bin/amigo/term_details?term=GO:0006928
neuron apoptotic process	GO:0051402	16	238	3.65e-07	1.2e-05	ENSMUSG00000029657|ENSMUSG00000042406|ENSMUSG00000023915|ENSMUSG00000020716|ENSMUSG00000040249|ENSMUSG00000034891|ENSMUSG00000032115|ENSMUSG00000031765|ENSMUSG00000036427|ENSMUSG00000022892|ENSMUSG00000078816|ENSMUSG00000026959|ENSMUSG00000028341|ENSMUSG00000023944|ENSMUSG00000038418|ENSMUSG00000039474	http://amigo.geneontology.org/cgi-bin/amigo/term_details?term=GO:0051402
regulation of response to stimulus	GO:0048583	70	2796	3.81e-07	1.24e-05	ENSMUSG00000059003|ENSMUSG00000042834|ENSMUSG00000022892|ENSMUSG00000028341|ENSMUSG00000024073|ENSMUSG00000040249|ENSMUSG00000021451|ENSMUSG00000053192|ENSMUSG00000035885|ENSMUSG00000058153|ENSMUSG00000022263|ENSMUSG00000031996|ENSMUSG00000031770|ENSMUSG00000039804|ENSMUSG00000026193|ENSMUSG00000015837|ENSMUSG00000028410|ENSMUSG00000031778|ENSMUSG00000005533|ENSMUSG00000004207|ENSMUSG00000034593|…	http://amigo.geneontology.org/cgi-bin/amigo/term_details?term=GO:0048583
protein complex subunit organization	GO:0071822	39	1174	3.96e-07	1.28e-05	ENSMUSG00000051586|ENSMUSG00000020716|ENSMUSG00000030357|ENSMUSG00000022892|ENSMUSG00000001930|ENSMUSG00000026193|ENSMUSG00000015837|ENSMUSG00000059003|ENSMUSG00000031778|ENSMUSG00000059248|ENSMUSG00000025487|ENSMUSG00000018411|ENSMUSG00000049313|ENSMUSG00000026959|ENSMUSG00000024335|ENSMUSG00000054423|ENSMUSG00000005533|ENSMUSG00000003814|ENSMUSG00000038170|ENSMUSG00000027254|ENSMUSG00000020428|…	http://amigo.geneontology.org/cgi-bin/amigo/term_details?term=GO:0071822
kinase binding	GO:0019900	26	601	4.03e-07	1.3e-05	ENSMUSG00000028341|ENSMUSG00000025855|ENSMUSG00000002957|ENSMUSG00000038894|ENSMUSG00000056258|ENSMUSG00000015837|ENSMUSG00000059003|ENSMUSG00000023944|ENSMUSG00000018411|ENSMUSG00000034187|ENSMUSG00000051391|ENSMUSG00000054423|ENSMUSG00000017485|ENSMUSG00000004951|ENSMUSG00000034994|ENSMUSG00000022285|ENSMUSG00000020893|ENSMUSG00000024042|ENSMUSG00000021313|ENSMUSG00000058135|ENSMUSG00000045038|…	http://amigo.geneontology.org/cgi-bin/amigo/term_details?term=GO:0019900
cadherin binding involved in cell-cell adhesion	GO:0098641	16	240	4.06e-07	1.3e-05	ENSMUSG00000045983|ENSMUSG00000034088|ENSMUSG00000023944|ENSMUSG00000000787|ENSMUSG00000015656|ENSMUSG00000022443|ENSMUSG00000005483|ENSMUSG00000026864|ENSMUSG00000059248|ENSMUSG00000034994|ENSMUSG00000022565|ENSMUSG00000022285|ENSMUSG00000040459|ENSMUSG00000074923|ENSMUSG00000025153|ENSMUSG00000021282	http://amigo.geneontology.org/cgi-bin/amigo/term_details?term=GO:0098641
axon terminus	GO:0043679	13	155	4.56e-07	1.45e-05	ENSMUSG00000030209|ENSMUSG00000034891|ENSMUSG00000025190|ENSMUSG00000022892|ENSMUSG00000023805|ENSMUSG00000047976|ENSMUSG00000049044|ENSMUSG00000015656|ENSMUSG00000035864|ENSMUSG00000026959|ENSMUSG00000059003|ENSMUSG00000061601|ENSMUSG00000033419	http://amigo.geneontology.org/cgi-bin/amigo/term_details?term=GO:0043679
programmed cell death	GO:0012501	47	1574	4.62e-07	1.46e-05	ENSMUSG00000059003|ENSMUSG00000040249|ENSMUSG00000023915|ENSMUSG00000024073|ENSMUSG00000053192|ENSMUSG00000022892|ENSMUSG00000031770|ENSMUSG00000038894|ENSMUSG00000026193|ENSMUSG00000015837|ENSMUSG00000028410|ENSMUSG00000031778|ENSMUSG00000005533|ENSMUSG00000018411|ENSMUSG00000020048|ENSMUSG00000020716|ENSMUSG00000025151|ENSMUSG00000032115|ENSMUSG00000034892|ENSMUSG00000004951|ENSMUSG00000034891|…	http://amigo.geneontology.org/cgi-bin/amigo/term_details?term=GO:0012501
regulation of primary metabolic process	GO:0080090	97	4416	5.05e-07	1.59e-05	ENSMUSG00000024073|ENSMUSG00000006575|ENSMUSG00000053192|ENSMUSG00000025855|ENSMUSG00000031770|ENSMUSG00000038894|ENSMUSG00000059003|ENSMUSG00000031778|ENSMUSG00000049313|ENSMUSG00000056602|ENSMUSG00000042453|ENSMUSG00000004951|ENSMUSG00000040761|ENSMUSG00000020893|ENSMUSG00000030209|ENSMUSG00000039501|ENSMUSG00000024042|ENSMUSG00000038244|ENSMUSG00000022658|ENSMUSG00000045038|ENSMUSG00000036427|…	http://amigo.geneontology.org/cgi-bin/amigo/term_details?term=GO:0080090
regulation of apoptotic process	GO:0042981	40	1234	5.09e-07	1.59e-05	ENSMUSG00000059003|ENSMUSG00000040249|ENSMUSG00000023915|ENSMUSG00000024073|ENSMUSG00000053192|ENSMUSG00000031770|ENSMUSG00000038894|ENSMUSG00000026193|ENSMUSG00000028341|ENSMUSG00000028410|ENSMUSG00000031778|ENSMUSG00000005533|ENSMUSG00000020048|ENSMUSG00000020716|ENSMUSG00000025151|ENSMUSG00000032115|ENSMUSG00000034892|ENSMUSG00000004951|ENSMUSG00000034891|ENSMUSG00000023034|ENSMUSG00000023944|…	http://amigo.geneontology.org/cgi-bin/amigo/term_details?term=GO:0042981
smooth endoplasmic reticulum	GO:0005790	7	30	5.23e-07	1.62e-05	ENSMUSG00000032115|ENSMUSG00000020571|ENSMUSG00000021313|ENSMUSG00000020048|ENSMUSG00000003814|ENSMUSG00000026864|ENSMUSG00000025823	http://amigo.geneontology.org/cgi-bin/amigo/term_details?term=GO:0005790
neuron death	GO:0070997	18	311	5.46e-07	1.69e-05	ENSMUSG00000029657|ENSMUSG00000042406|ENSMUSG00000049313|ENSMUSG00000020716|ENSMUSG00000040249|ENSMUSG00000034891|ENSMUSG00000045095|ENSMUSG00000032115|ENSMUSG00000023915|ENSMUSG00000031765|ENSMUSG00000036427|ENSMUSG00000022892|ENSMUSG00000078816|ENSMUSG00000026959|ENSMUSG00000028341|ENSMUSG00000023944|ENSMUSG00000038418|ENSMUSG00000039474	http://amigo.geneontology.org/cgi-bin/amigo/term_details?term=GO:0070997
main axon	GO:0044304	9	64	5.61e-07	1.72e-05	ENSMUSG00000026442|ENSMUSG00000018411|ENSMUSG00000069601|ENSMUSG00000052727|ENSMUSG00000047976|ENSMUSG00000023033|ENSMUSG00000022892|ENSMUSG00000056258|ENSMUSG00000062591	http://amigo.geneontology.org/cgi-bin/amigo/term_details?term=GO:0044304
neuromuscular process	GO:0050905	11	108	6.04e-07	1.84e-05	ENSMUSG00000030302|ENSMUSG00000030209|ENSMUSG00000034593|ENSMUSG00000047976|ENSMUSG00000019874|ENSMUSG00000031996|ENSMUSG00000023033|ENSMUSG00000028341|ENSMUSG00000022892|ENSMUSG00000026959|ENSMUSG00000059003	http://amigo.geneontology.org/cgi-bin/amigo/term_details?term=GO:0050905
ion transport	GO:0006811	38	1148	6.15e-07	1.87e-05	ENSMUSG00000020716|ENSMUSG00000059970|ENSMUSG00000030357|ENSMUSG00000020577|ENSMUSG00000020428|ENSMUSG00000038894|ENSMUSG00000056258|ENSMUSG00000059003|ENSMUSG00000019082|ENSMUSG00000034187|ENSMUSG00000034593|ENSMUSG00000027894|ENSMUSG00000041313|ENSMUSG00000023033|ENSMUSG00000042453|ENSMUSG00000017740|ENSMUSG00000089774|ENSMUSG00000020893|ENSMUSG00000024042|ENSMUSG00000039474|ENSMUSG00000030302|…	http://amigo.geneontology.org/cgi-bin/amigo/term_details?term=GO:0006811
purine ribonucleotide binding	GO:0032555	47	1591	6.21e-07	1.87e-05	ENSMUSG00000051853|ENSMUSG00000029777|ENSMUSG00000063077|ENSMUSG00000059970|ENSMUSG00000030357|ENSMUSG00000068739|ENSMUSG00000024042|ENSMUSG00000026864|ENSMUSG00000030655|ENSMUSG00000028410|ENSMUSG00000023944|ENSMUSG00000022443|ENSMUSG00000059248|ENSMUSG00000034187|ENSMUSG00000034593|ENSMUSG00000029020|ENSMUSG00000026356|ENSMUSG00000032115|ENSMUSG00000022263|ENSMUSG00000017485|ENSMUSG00000023033|…	http://amigo.geneontology.org/cgi-bin/amigo/term_details?term=GO:0032555
nucleotide binding	GO:0000166	55	2008	6.27e-07	1.87e-05	ENSMUSG00000051853|ENSMUSG00000051586|ENSMUSG00000029777|ENSMUSG00000063077|ENSMUSG00000059970|ENSMUSG00000045193|ENSMUSG00000030357|ENSMUSG00000068739|ENSMUSG00000024042|ENSMUSG00000023805|ENSMUSG00000026864|ENSMUSG00000030655|ENSMUSG00000028410|ENSMUSG00000023944|ENSMUSG00000022443|ENSMUSG00000005533|ENSMUSG00000034187|ENSMUSG00000034593|ENSMUSG00000029020|ENSMUSG00000026356|ENSMUSG00000032115|…	http://amigo.geneontology.org/cgi-bin/amigo/term_details?term=GO:0000166
nucleoside phosphate binding	GO:1901265	55	2008	6.27e-07	1.87e-05	ENSMUSG00000051853|ENSMUSG00000051586|ENSMUSG00000029777|ENSMUSG00000063077|ENSMUSG00000059970|ENSMUSG00000045193|ENSMUSG00000030357|ENSMUSG00000068739|ENSMUSG00000024042|ENSMUSG00000023805|ENSMUSG00000026864|ENSMUSG00000030655|ENSMUSG00000028410|ENSMUSG00000023944|ENSMUSG00000022443|ENSMUSG00000005533|ENSMUSG00000034187|ENSMUSG00000034593|ENSMUSG00000029020|ENSMUSG00000026356|ENSMUSG00000032115|…	http://amigo.geneontology.org/cgi-bin/amigo/term_details?term=GO:1901265
cell-cell adherens junction	GO:0005913	17	281	6.35e-07	1.88e-05	ENSMUSG00000045983|ENSMUSG00000034088|ENSMUSG00000052698|ENSMUSG00000000787|ENSMUSG00000015656|ENSMUSG00000022443|ENSMUSG00000005483|ENSMUSG00000026864|ENSMUSG00000059248|ENSMUSG00000034994|ENSMUSG00000022565|ENSMUSG00000022285|ENSMUSG00000023944|ENSMUSG00000040459|ENSMUSG00000074923|ENSMUSG00000025153|ENSMUSG00000021282	http://amigo.geneontology.org/cgi-bin/amigo/term_details?term=GO:0005913
cellular response to stress	GO:0033554	43	1392	6.38e-07	1.88e-05	ENSMUSG00000020716|ENSMUSG00000045193|ENSMUSG00000035885|ENSMUSG00000020571|ENSMUSG00000031770|ENSMUSG00000028341|ENSMUSG00000021250|ENSMUSG00000030655|ENSMUSG00000015837|ENSMUSG00000028410|ENSMUSG00000005533|ENSMUSG00000018411|ENSMUSG00000004207|ENSMUSG00000029020|ENSMUSG00000032115|ENSMUSG00000029467|ENSMUSG00000020048|ENSMUSG00000004951|ENSMUSG00000003814|ENSMUSG00000020893|ENSMUSG00000004032|…	http://amigo.geneontology.org/cgi-bin/amigo/term_details?term=GO:0033554
regulation of programmed cell death	GO:0043067	40	1248	6.7e-07	1.97e-05	ENSMUSG00000059003|ENSMUSG00000040249|ENSMUSG00000023915|ENSMUSG00000024073|ENSMUSG00000053192|ENSMUSG00000031770|ENSMUSG00000038894|ENSMUSG00000026193|ENSMUSG00000028341|ENSMUSG00000028410|ENSMUSG00000031778|ENSMUSG00000005533|ENSMUSG00000020048|ENSMUSG00000020716|ENSMUSG00000025151|ENSMUSG00000032115|ENSMUSG00000034892|ENSMUSG00000004951|ENSMUSG00000034891|ENSMUSG00000023034|ENSMUSG00000023944|…	http://amigo.geneontology.org/cgi-bin/amigo/term_details?term=GO:0043067
purine nucleotide binding	GO:0017076	47	1600	7.24e-07	2.11e-05	ENSMUSG00000051853|ENSMUSG00000029777|ENSMUSG00000063077|ENSMUSG00000059970|ENSMUSG00000030357|ENSMUSG00000068739|ENSMUSG00000024042|ENSMUSG00000026864|ENSMUSG00000030655|ENSMUSG00000028410|ENSMUSG00000023944|ENSMUSG00000022443|ENSMUSG00000059248|ENSMUSG00000034187|ENSMUSG00000034593|ENSMUSG00000029020|ENSMUSG00000026356|ENSMUSG00000032115|ENSMUSG00000022263|ENSMUSG00000017485|ENSMUSG00000023033|…	http://amigo.geneontology.org/cgi-bin/amigo/term_details?term=GO:0017076
regulation of cellular metabolic process	GO:0031323	97	4457	7.7e-07	2.21e-05	ENSMUSG00000024073|ENSMUSG00000006575|ENSMUSG00000053192|ENSMUSG00000025855|ENSMUSG00000031770|ENSMUSG00000038894|ENSMUSG00000031778|ENSMUSG00000049313|ENSMUSG00000056602|ENSMUSG00000042453|ENSMUSG00000004951|ENSMUSG00000040761|ENSMUSG00000020893|ENSMUSG00000030209|ENSMUSG00000039501|ENSMUSG00000024042|ENSMUSG00000038244|ENSMUSG00000022658|ENSMUSG00000045038|ENSMUSG00000036427|ENSMUSG00000026959|…	http://amigo.geneontology.org/cgi-bin/amigo/term_details?term=GO:0031323
protein kinase binding	GO:0019901	24	542	7.71e-07	2.21e-05	ENSMUSG00000038894|ENSMUSG00000025855|ENSMUSG00000002957|ENSMUSG00000028341|ENSMUSG00000056258|ENSMUSG00000015837|ENSMUSG00000059003|ENSMUSG00000023944|ENSMUSG00000018411|ENSMUSG00000034187|ENSMUSG00000051391|ENSMUSG00000054423|ENSMUSG00000017485|ENSMUSG00000004951|ENSMUSG00000034994|ENSMUSG00000022285|ENSMUSG00000024042|ENSMUSG00000021313|ENSMUSG00000058135|ENSMUSG00000045038|ENSMUSG00000035954|…	http://amigo.geneontology.org/cgi-bin/amigo/term_details?term=GO:0019901
ribonucleotide binding	GO:0032553	47	1606	8.02e-07	2.29e-05	ENSMUSG00000051853|ENSMUSG00000029777|ENSMUSG00000063077|ENSMUSG00000059970|ENSMUSG00000030357|ENSMUSG00000068739|ENSMUSG00000024042|ENSMUSG00000026864|ENSMUSG00000030655|ENSMUSG00000028410|ENSMUSG00000023944|ENSMUSG00000022443|ENSMUSG00000059248|ENSMUSG00000034187|ENSMUSG00000034593|ENSMUSG00000029020|ENSMUSG00000026356|ENSMUSG00000032115|ENSMUSG00000022263|ENSMUSG00000017485|ENSMUSG00000023033|…	http://amigo.geneontology.org/cgi-bin/amigo/term_details?term=GO:0032553
negative regulation of apoptotic process	GO:0043066	29	752	8.23e-07	2.34e-05	ENSMUSG00000040249|ENSMUSG00000028341|ENSMUSG00000024073|ENSMUSG00000027951|ENSMUSG00000031770|ENSMUSG00000038894|ENSMUSG00000026193|ENSMUSG00000028410|ENSMUSG00000031778|ENSMUSG00000005533|ENSMUSG00000023944|ENSMUSG00000032115|ENSMUSG00000020048|ENSMUSG00000004951|ENSMUSG00000034891|ENSMUSG00000023034|ENSMUSG00000039474|ENSMUSG00000045038|ENSMUSG00000036427|ENSMUSG00000078816|ENSMUSG00000026959|…	http://amigo.geneontology.org/cgi-bin/amigo/term_details?term=GO:0043066
small molecule binding	GO:0036094	58	2188	8.27e-07	2.34e-05	ENSMUSG00000051853|ENSMUSG00000051586|ENSMUSG00000029777|ENSMUSG00000063077|ENSMUSG00000059970|ENSMUSG00000045193|ENSMUSG00000030357|ENSMUSG00000068739|ENSMUSG00000024042|ENSMUSG00000023805|ENSMUSG00000026864|ENSMUSG00000030655|ENSMUSG00000028410|ENSMUSG00000023944|ENSMUSG00000022443|ENSMUSG00000005533|ENSMUSG00000034187|ENSMUSG00000034593|ENSMUSG00000029020|ENSMUSG00000026356|ENSMUSG00000032115|…	http://amigo.geneontology.org/cgi-bin/amigo/term_details?term=GO:0036094
neuron projection morphogenesis	GO:0048812	23	507	8.88e-07	2.5e-05	ENSMUSG00000052727|ENSMUSG00000033585|ENSMUSG00000021451|ENSMUSG00000026193|ENSMUSG00000028341|ENSMUSG00000055407|ENSMUSG00000035864|ENSMUSG00000096054|ENSMUSG00000018411|ENSMUSG00000022054|ENSMUSG00000017485|ENSMUSG00000042453|ENSMUSG00000005533|ENSMUSG00000069601|ENSMUSG00000029765|ENSMUSG00000033004|ENSMUSG00000025020|ENSMUSG00000027296|ENSMUSG00000026959|ENSMUSG00000033419|ENSMUSG00000026442|…	http://amigo.geneontology.org/cgi-bin/amigo/term_details?term=GO:0048812
regulation of macromolecule metabolic process	GO:0060255	96	4413	9.23e-07	2.58e-05	ENSMUSG00000024073|ENSMUSG00000053192|ENSMUSG00000025855|ENSMUSG00000031770|ENSMUSG00000038894|ENSMUSG00000059003|ENSMUSG00000031778|ENSMUSG00000049313|ENSMUSG00000056602|ENSMUSG00000042453|ENSMUSG00000004951|ENSMUSG00000040761|ENSMUSG00000020893|ENSMUSG00000030209|ENSMUSG00000039501|ENSMUSG00000032826|ENSMUSG00000024042|ENSMUSG00000038244|ENSMUSG00000022658|ENSMUSG00000045038|ENSMUSG00000036427|…	http://amigo.geneontology.org/cgi-bin/amigo/term_details?term=GO:0060255
focal adhesion	GO:0005925	18	324	9.56e-07	2.66e-05	ENSMUSG00000026442|ENSMUSG00000040249|ENSMUSG00000047215|ENSMUSG00000015656|ENSMUSG00000032115|ENSMUSG00000051391|ENSMUSG00000024427|ENSMUSG00000024942|ENSMUSG00000034892|ENSMUSG00000004951|ENSMUSG00000022565|ENSMUSG00000022285|ENSMUSG00000003814|ENSMUSG00000020048|ENSMUSG00000026864|ENSMUSG00000052698|ENSMUSG00000022443|ENSMUSG00000073702	http://amigo.geneontology.org/cgi-bin/amigo/term_details?term=GO:0005925
cellular component assembly	GO:0022607	54	1984	9.76e-07	2.7e-05	ENSMUSG00000018707|ENSMUSG00000049313|ENSMUSG00000059970|ENSMUSG00000030357|ENSMUSG00000022892|ENSMUSG00000001930|ENSMUSG00000032589|ENSMUSG00000026193|ENSMUSG00000022565|ENSMUSG00000015837|ENSMUSG00000059003|ENSMUSG00000031778|ENSMUSG00000005533|ENSMUSG00000042453|ENSMUSG00000025487|ENSMUSG00000018411|ENSMUSG00000039953|ENSMUSG00000029020|ENSMUSG00000026959|ENSMUSG00000027763|ENSMUSG00000024335|…	http://amigo.geneontology.org/cgi-bin/amigo/term_details?term=GO:0022607
cell-substrate adherens junction	GO:0005924	18	327	1.08e-06	2.99e-05	ENSMUSG00000026442|ENSMUSG00000040249|ENSMUSG00000047215|ENSMUSG00000015656|ENSMUSG00000032115|ENSMUSG00000051391|ENSMUSG00000024427|ENSMUSG00000024942|ENSMUSG00000034892|ENSMUSG00000004951|ENSMUSG00000022565|ENSMUSG00000022285|ENSMUSG00000003814|ENSMUSG00000020048|ENSMUSG00000026864|ENSMUSG00000052698|ENSMUSG00000022443|ENSMUSG00000073702	http://amigo.geneontology.org/cgi-bin/amigo/term_details?term=GO:0005924
negative regulation of programmed cell death	GO:0043069	29	765	1.15e-06	3.14e-05	ENSMUSG00000040249|ENSMUSG00000028341|ENSMUSG00000024073|ENSMUSG00000027951|ENSMUSG00000031770|ENSMUSG00000038894|ENSMUSG00000026193|ENSMUSG00000028410|ENSMUSG00000031778|ENSMUSG00000005533|ENSMUSG00000023944|ENSMUSG00000032115|ENSMUSG00000020048|ENSMUSG00000004951|ENSMUSG00000034891|ENSMUSG00000023034|ENSMUSG00000039474|ENSMUSG00000045038|ENSMUSG00000036427|ENSMUSG00000078816|ENSMUSG00000026959|…	http://amigo.geneontology.org/cgi-bin/amigo/term_details?term=GO:0043069
postsynaptic membrane	GO:0045211	14	199	1.19e-06	3.24e-05	ENSMUSG00000000560|ENSMUSG00000022602|ENSMUSG00000039953|ENSMUSG00000069601|ENSMUSG00000032826|ENSMUSG00000041444|ENSMUSG00000034275|ENSMUSG00000033419|ENSMUSG00000030209|ENSMUSG00000020428|ENSMUSG00000004951|ENSMUSG00000026959|ENSMUSG00000059003|ENSMUSG00000096054	http://amigo.geneontology.org/cgi-bin/amigo/term_details?term=GO:0045211
synapse organization	GO:0050808	14	199	1.19e-06	3.24e-05	ENSMUSG00000026442|ENSMUSG00000030302|ENSMUSG00000058153|ENSMUSG00000039953|ENSMUSG00000069601|ENSMUSG00000026959|ENSMUSG00000034891|ENSMUSG00000032589|ENSMUSG00000030683|ENSMUSG00000022892|ENSMUSG00000034593|ENSMUSG00000013089|ENSMUSG00000061601|ENSMUSG00000042453	http://amigo.geneontology.org/cgi-bin/amigo/term_details?term=GO:0050808
cellular protein metabolic process	GO:0044267	83	3651	1.24e-06	3.35e-05	ENSMUSG00000045983|ENSMUSG00000022892|ENSMUSG00000020716|ENSMUSG00000059970|ENSMUSG00000021451|ENSMUSG00000030357|ENSMUSG00000068739|ENSMUSG00000030209|ENSMUSG00000022263|ENSMUSG00000045038|ENSMUSG00000031996|ENSMUSG00000031770|ENSMUSG00000025855|ENSMUSG00000026193|ENSMUSG00000030655|ENSMUSG00000015837|ENSMUSG00000028410|ENSMUSG00000031778|ENSMUSG00000022443|ENSMUSG00000005533|ENSMUSG00000030224|…	http://amigo.geneontology.org/cgi-bin/amigo/term_details?term=GO:0044267
inclusion body	GO:0016234	8	52	1.31e-06	3.52e-05	ENSMUSG00000042406|ENSMUSG00000046876|ENSMUSG00000034891|ENSMUSG00000043940|ENSMUSG00000031770|ENSMUSG00000034994|ENSMUSG00000015837|ENSMUSG00000023944	http://amigo.geneontology.org/cgi-bin/amigo/term_details?term=GO:0016234
axonogenesis	GO:0007409	19	369	1.4e-06	3.74e-05	ENSMUSG00000026442|ENSMUSG00000018411|ENSMUSG00000026131|ENSMUSG00000069601|ENSMUSG00000026959|ENSMUSG00000029765|ENSMUSG00000021451|ENSMUSG00000052727|ENSMUSG00000022054|ENSMUSG00000017485|ENSMUSG00000033004|ENSMUSG00000025020|ENSMUSG00000042453|ENSMUSG00000033419|ENSMUSG00000028341|ENSMUSG00000026193|ENSMUSG00000033585|ENSMUSG00000022892|ENSMUSG00000005533	http://amigo.geneontology.org/cgi-bin/amigo/term_details?term=GO:0007409
regulation of neuronal synaptic plasticity	GO:0048168	8	53	1.49e-06	3.95e-05	ENSMUSG00000030209|ENSMUSG00000020716|ENSMUSG00000035383|ENSMUSG00000002028|ENSMUSG00000028833|ENSMUSG00000026959|ENSMUSG00000059003|ENSMUSG00000038418	http://amigo.geneontology.org/cgi-bin/amigo/term_details?term=GO:0048168
response to abiotic stimulus	GO:0009628	28	733	1.53e-06	4.03e-05	ENSMUSG00000020716|ENSMUSG00000032115|ENSMUSG00000022892|ENSMUSG00000028410|ENSMUSG00000059003|ENSMUSG00000045193|ENSMUSG00000020048|ENSMUSG00000017740|ENSMUSG00000020893|ENSMUSG00000024042|ENSMUSG00000030302|ENSMUSG00000030209|ENSMUSG00000046876|ENSMUSG00000030268|ENSMUSG00000021250|ENSMUSG00000021313|ENSMUSG00000047976|ENSMUSG00000030103|ENSMUSG00000045038|ENSMUSG00000026959|ENSMUSG00000038418|…	http://amigo.geneontology.org/cgi-bin/amigo/term_details?term=GO:0009628
neurological system process	GO:0050877	31	866	1.54e-06	4.03e-05	ENSMUSG00000033585|ENSMUSG00000020716|ENSMUSG00000025855|ENSMUSG00000031996|ENSMUSG00000028341|ENSMUSG00000022892|ENSMUSG00000059003|ENSMUSG00000034593|ENSMUSG00000023033|ENSMUSG00000042453|ENSMUSG00000017740|ENSMUSG00000027254|ENSMUSG00000049044|ENSMUSG00000030302|ENSMUSG00000030209|ENSMUSG00000046876|ENSMUSG00000069601|ENSMUSG00000038248|ENSMUSG00000048078|ENSMUSG00000047976|ENSMUSG00000023915|…	http://amigo.geneontology.org/cgi-bin/amigo/term_details?term=GO:0050877
homeostatic process	GO:0042592	42	1400	1.81e-06	4.71e-05	ENSMUSG00000033585|ENSMUSG00000028341|ENSMUSG00000020716|ENSMUSG00000053192|ENSMUSG00000020571|ENSMUSG00000031996|ENSMUSG00000031770|ENSMUSG00000039804|ENSMUSG00000022892|ENSMUSG00000030655|ENSMUSG00000008348|ENSMUSG00000005533|ENSMUSG00000039953|ENSMUSG00000034593|ENSMUSG00000026959|ENSMUSG00000017740|ENSMUSG00000024030|ENSMUSG00000027254|ENSMUSG00000027951|ENSMUSG00000039474|ENSMUSG00000030302|…	http://amigo.geneontology.org/cgi-bin/amigo/term_details?term=GO:0042592
regulation of metabolic process	GO:0019222	100	4731	1.82e-06	4.73e-05	ENSMUSG00000024073|ENSMUSG00000006575|ENSMUSG00000053192|ENSMUSG00000025855|ENSMUSG00000031770|ENSMUSG00000038894|ENSMUSG00000059003|ENSMUSG00000031778|ENSMUSG00000049313|ENSMUSG00000056602|ENSMUSG00000042453|ENSMUSG00000004951|ENSMUSG00000040761|ENSMUSG00000020893|ENSMUSG00000030209|ENSMUSG00000039501|ENSMUSG00000032826|ENSMUSG00000024042|ENSMUSG00000038244|ENSMUSG00000022658|ENSMUSG00000045038|…	http://amigo.geneontology.org/cgi-bin/amigo/term_details?term=GO:0019222
cellular response to organic substance	GO:0071310	44	1502	1.84e-06	4.73e-05	ENSMUSG00000059003|ENSMUSG00000042834|ENSMUSG00000033585|ENSMUSG00000039804|ENSMUSG00000030357|ENSMUSG00000022892|ENSMUSG00000024042|ENSMUSG00000031770|ENSMUSG00000038894|ENSMUSG00000026193|ENSMUSG00000028341|ENSMUSG00000028410|ENSMUSG00000031778|ENSMUSG00000005533|ENSMUSG00000004207|ENSMUSG00000034593|ENSMUSG00000023944|ENSMUSG00000051391|ENSMUSG00000023034|ENSMUSG00000004951|ENSMUSG00000071172|…	http://amigo.geneontology.org/cgi-bin/amigo/term_details?term=GO:0071310
purine ribonucleoside triphosphate binding	GO:0035639	45	1554	1.86e-06	4.78e-05	ENSMUSG00000051853|ENSMUSG00000029777|ENSMUSG00000063077|ENSMUSG00000059970|ENSMUSG00000030357|ENSMUSG00000068739|ENSMUSG00000024042|ENSMUSG00000026864|ENSMUSG00000030655|ENSMUSG00000028410|ENSMUSG00000023944|ENSMUSG00000022443|ENSMUSG00000059248|ENSMUSG00000034187|ENSMUSG00000034593|ENSMUSG00000029020|ENSMUSG00000026356|ENSMUSG00000032115|ENSMUSG00000022263|ENSMUSG00000017485|ENSMUSG00000021794|…	http://amigo.geneontology.org/cgi-bin/amigo/term_details?term=GO:0035639
[truncated: 343 more rows]

## Sheet: Table S5
Table S5. Kyoto Encyclopedia of Genes and Genomes (KEGG) enrichment analysis of 354 DEGs.
Pathway	Database	ID	Input number	Background number	P-Value	Corrected P-Value	Input	Hyperlink
[truncated: 130 more rows]

## Sheet: Table S6
Table S6. The gene list of DEGs in the top 10 enriched KEGG pathways
[truncated: 115 more rows]

[truncated: 1 more sheets: Table S7]
